# Supplementary material
Source: publisher figshare collection journal article supplement (https://acs.figshare.com/ndownloader/files/13372694)

Supporting Information for:

# **Silver-Catalyzed Olefination of Acetals and Ketals with Diazoesters to $\beta$ -Alkoxyacrylates**

Jiawen Li<sup>†,§</sup>, Bo Qian<sup>\*,†</sup>, and Hanmin Huang<sup>\*,†,‡</sup>

<sup>†</sup>State Key Laboratory for Oxo Synthesis and Selective Oxidation, Lanzhou Institute of Chemical Physics, Chinese Academy of Sciences, Lanzhou 730000, P. R. China

<sup>‡</sup>Hefei National Laboratory for Physical Sciences at the Microscale and Department of Chemistry, Center for Excellence in Molecular Synthesis, University of Science and Technology of China, Chinese Academy of Sciences, Hefei, 230026, P. R. China

<sup>§</sup>University of Chinese Academy of Sciences, Beijing 100049, P. R. China

E-mail: [hanmin@ustc.edu.cn](mailto:hanmin@ustc.edu.cn)

## **CONTENTS**

- 1 General experimental details and materials**
- 2 General procedure for the synthesis of acetal and ketal**
- 3 Optimization of reaction conditions**
- 4 General procedure for the olefination of acetals/ketals with diazoesters**
- 5 Experimental characterization data for products**
- 6 Gram-scale reaction**
- 7 Hydrolysis of alkenyl ether**
- 8 Procedure for the Ni-catalyzed Suzuki coupling reaction**
- 9 Procedure for the synthesis of picoxystrobin**
- 10 References**
- 11 Copies for NMR of substrate and products**

## 1. General experiment details and materials

All non-aqueous reactions and manipulations were used by standard Schlenk techniques. All solvents before used were dried and degassed by standard methods and stored under argon atmosphere. All reactions were monitored by TLC with silica gel-coated plates. NMR spectra were recorded on BRUKER Avance III (400 MHz) spectrometers. Chemical shifts were reported in parts per million (ppm) down field from TMS with the solvent resonance as the internal standard. Coupling constants (J) were reported in Hz and referred to apparent peak multiplications. High resolution mass spectra (HRMS) were recorded on Bruker MicroTOF-QII mass instrument (ESI). GC analysis were performed on Agilent 7890 with OV-225 column or Hp-5 column. GS-MS analysis were performed with Agilent 7890A/5975C GC-MS system. Acetals and ketals used here were known compounds and synthesized according to the reported references.<sup>1</sup> Methyl diazoacetate was synthesized according to the reported reference.<sup>2</sup> *t*-butyl diazoacetate was synthesized according to the reported reference.<sup>3</sup> **3r** and **3r'** were synthesized according to the reported reference.<sup>4</sup>

## 2. General procedure for the synthesis of acetal and ketal

Acetals and ketals were synthesized according the below proceduer.

(4-fluorophenyl)(4-methoxyphenyl)methanone (11.5 g, 50 mmol), methyl orthoformate (6.4 g, 60 mmol) and MeOH (30 mL) were added to a 250 mL flask under nitrogen at 25 °C. Then H<sub>2</sub>SO<sub>4</sub> (98%, 100 uL) was added into the mixture and the mixture was stirred at 25 °C for 24 hours. After the reaction finished NaOH (30% aq, 5 mL) was added. The solvent was removed under reduced pressure. The reaction mixture was purified by flash column chromatography on neutral aluminium oxide and eluted with EtOAc/hexane (1/100 – 1/20) to afford the desired product 1-(dimethoxy(4-methoxyphenyl)methyl)-4-fluorobenzene as a with solid 12.7 g (92%).

**1-(dimethoxy(4-methoxyphenyl)methyl)-4-fluorobenzene (4q):** <sup>1</sup>H NMR (400 MHz,

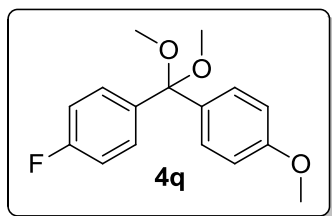

CDCl<sub>3</sub>) δ 3.09 (s, 6H), 3.78 (s, 3H), 6.83 (d, *J* = 8.8 Hz, 2H), 6.94-6.99 (m, 2H), 7.39 (d, *J* = 8.8 Hz, 2H), 7.43-7.47 (m, 2H); <sup>13</sup>C NMR (100 MHz, CDCl<sub>3</sub>) δ 49.2,

55.2, 102.4, 113.3, 114.8 (d, *J* = 85.2 Hz), 128.1, 128.7 (d, *J* = 32.4 Hz), 134.5, 138.6, 158.9, 160.8, 163.3; <sup>19</sup>F NMR (376 MHz, CDCl<sub>3</sub>) δ -115.5; HRMS (ESI) calcd. for C<sub>16</sub>H<sub>17</sub>FNao<sub>3</sub> [M+Na]: 299.1054, found: 299.1044.

## 3. Optimization of reaction conditions

**Table S1: Screening of catalysts<sup>[a]</sup>**

| entry | catalyst                                | yield (%) <sup>[b]</sup> | <b>3a/3a'</b> ( <i>E/Z</i> ) <sup>[c]</sup> |
|-------|-----------------------------------------|--------------------------|---------------------------------------------|
| 1     | BPh <sub>3</sub>                        | 0                        | -                                           |
| 2     | BF <sub>3</sub> ·Et <sub>2</sub> O      | 16                       | 3:1                                         |
| 3     | Yb(OTf) <sub>3</sub> ·xH <sub>2</sub> O | 9                        | 4:1                                         |
| 4     | Bi(OTf) <sub>3</sub> ·xH <sub>2</sub> O | 7                        | 2:1                                         |
| 5     | Eu(OTf) <sub>3</sub> ·xH <sub>2</sub> O | 6                        | 3:1                                         |
| 6     | Sc(OTf) <sub>3</sub>                    | 2                        | -                                           |
| 7     | ZnCl <sub>2</sub>                       | 0                        | -                                           |
| 8     | SnCl <sub>2</sub>                       | 0                        | -                                           |
| 9     | AlCl <sub>3</sub>                       | 0                        | -                                           |
| 10    | Ag <sub>2</sub> WO <sub>4</sub>         | 0                        | -                                           |
| 11    | Ag <sub>2</sub> SO <sub>4</sub>         | 0                        | -                                           |

|    |                                  |    |        |
|----|----------------------------------|----|--------|
| 12 | Ag <sub>2</sub> SO <sub>3</sub>  | 0  | -      |
| 13 | AgBrO <sub>3</sub>               | 0  | -      |
| 14 | AgNO <sub>3</sub>                | 0  | -      |
| 15 | AgF                              | 0  | -      |
| 16 | AgNCO                            | 0  | -      |
| 17 | Silver stearate                  | 0  | -      |
| 18 | Ag <sub>2</sub> O                | 0  | -      |
| 19 | Ag <sub>2</sub> CrO <sub>4</sub> | 0  | -      |
| 20 | AgTFA                            | 0  | -      |
| 21 | PhCOOAg                          | 0  | -      |
| 22 | Ag <sub>3</sub> PO <sub>4</sub>  | 0  | -      |
| 23 | Ag <sub>2</sub> CO <sub>3</sub>  | 0  | -      |
| 24 | AgBF <sub>4</sub>                | 0  | -      |
| 25 | AgClO <sub>4</sub>               | 0  | -      |
| 26 | AgPF <sub>6</sub>                | 22 | 2:1    |
| 27 | AgSbF <sub>6</sub>               | 69 | > 20:1 |
| 28 | HOTf                             | 0  | -      |
| 29 | TsOH                             | 0  | -      |
| 30 | NaSbF <sub>6</sub>               | 0  | -      |
| 31 | -                                | 0  | -      |

<sup>[a]</sup> Reaction conditions: **1a** (76.0 mg, 0.5 mmol), **2a** (68.4 mg, 0.6 mmol), catalyst (1.0 mol %), THF (1.0 mL) at 100 °C for 2 hours. <sup>[b]</sup> Yield was determined by GC using *n*-tetradecane as the internal standard. <sup>[c]</sup> Ratios (*E/Z*) were determined by GC-MS and GC analysis of the crude reaction mixture.

**Table S2: Screening of reaction time<sup>[a]</sup>**

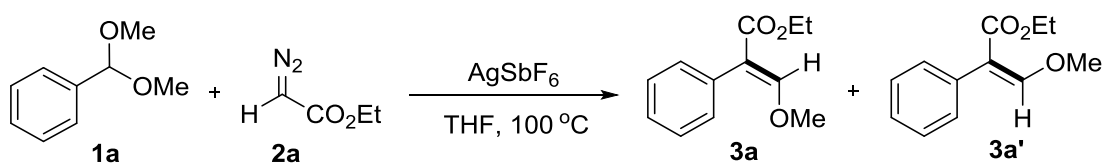

| entry | time (h) | yield (%) <sup>[b]</sup> | <i>E/Z</i> ratio <sup>[c]</sup> |
|-------|----------|--------------------------|---------------------------------|
| 1     | 1        | 24                       | 2:1                             |
| 2     | 2        | 69                       | >20:1                           |
| 3     | 3        | 73                       | >20:1                           |
| 4     | 4        | 70                       | >20:1                           |

<sup>[a]</sup> Reaction conditions: **1a** (76.0 mg, 0.5 mmol), **2a** (68.4 mg, 0.6 mmol), AgSbF<sub>6</sub> (1.0 mol %), THF (1.0 mL) at 100 °C. <sup>[b]</sup> Yield was determined by GC using *n*-tetradecane as the internal standard. <sup>[c]</sup> Ratios (*E/Z*) were determined by GC-MS and GC analysis of the crude reaction mixture.

**Table S3: Screening of solvent<sup>[a]</sup>**

| entry | solvent                                                            | yield (%) <sup>[b]</sup> | <i>E/Z</i> ratio <sup>[c]</sup> |
|-------|--------------------------------------------------------------------|--------------------------|---------------------------------|
| 1     | CH <sub>3</sub> CN                                                 | 0                        | -                               |
| 2     | toluene                                                            | 0                        | -                               |
| 3     | DMF                                                                | 0                        | -                               |
| 4     | DMSO                                                               | 0                        | -                               |
| 5     | 2-PrOH                                                             | 0                        | -                               |
| 6     | DCM                                                                | 76                       | > 20:1                          |
| 7     | 1,4-dioxane                                                        | 0                        | -                               |
| 8     | NMP                                                                | 0                        | -                               |
| 9     | ether                                                              | 0                        | -                               |
| 10    | CHCl <sub>3</sub>                                                  | 91                       | > 20:1                          |
| 11    | CCl <sub>4</sub>                                                   | 4                        | > 20:1                          |
| 12    | ClCH <sub>2</sub> CH <sub>2</sub> Cl                               | 68                       | > 20:1                          |
| 13    | Cl <sub>2</sub> CHCHCl <sub>2</sub>                                | 82                       | > 20:1                          |
| 14    | Br <sub>2</sub> CHCHBr <sub>2</sub>                                | 61                       | 10:1                            |
| 15    | CH <sub>3</sub> CH <sub>2</sub> CH <sub>2</sub> CH <sub>2</sub> Br | 15                       | 4:1                             |
| 16    | C <sub>6</sub> H <sub>5</sub> Br                                   | 0                        | -                               |

<sup>[a]</sup> Reaction conditions: **1a** (76.0 mg, 0.5 mmol), **2a** (68.4 mg, 0.6 mmol), AgSbF<sub>6</sub> (1.0 mol %), solvent (1.0 mL) at 100 °C for 3 hours. <sup>[b]</sup> Yield was determined by GC using *n*-tetradecane as the internal standard. <sup>[c]</sup> Ratios (*E/Z*) were determined by GC-MS and GC analysis of the crude reaction mixture.

**Table S4: Screening of temperature<sup>[a]</sup>**

| entry | temp. (°C) | yield (%) <sup>[b]</sup> | <i>E/Z</i> ratio <sup>[c]</sup> |
|-------|------------|--------------------------|---------------------------------|
| 1     | 25         | 23                       | > 20:1                          |
| 2     | 80         | 31                       | > 20:1                          |
| 3     | 100        | 91                       | > 20:1                          |
| 4     | 120        | 78                       | 8:1                             |

<sup>[a]</sup> Reaction conditions: **1a** (76.0 mg, 0.5 mmol), **2a** (68.4 mg, 0.6 mmol); AgSbF<sub>6</sub> (1.0 mol %), CHCl<sub>3</sub> (1.0 mL) for 3 hours. <sup>[b]</sup> Yield was determined by GC using *n*-tetradecane as the internal standard. <sup>[c]</sup> Ratios (*E/Z*) were determined by GC-MS and GC analysis of the crude reaction mixture.

#### 4. General procedure for the olefination of acetals/ketals with diazoesters

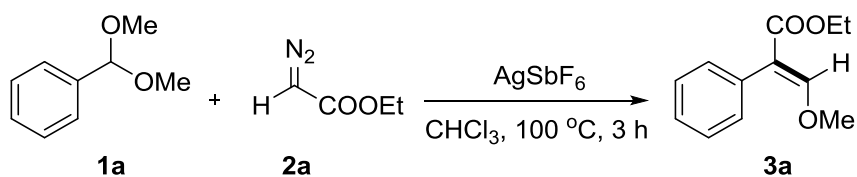

$\text{AgSbF}_6$  (1.7 mg, 0.005 mmol) was added into a 25 mL flame-dried Young-type tube in a glove box. Then acetal **1a** (76.0 mg, 0.5 mmol),  $\text{CHCl}_3$  (1.0 mL) and ethyl diazoacetate **2a** (68.4 mg, 0.6 mmol) were added into the tube under argon atmosphere. The mixture was stirred at  $100^\circ\text{C}$  for 3 hours. After cooling to room temperature, the solvent was removed under reduced pressure. The reaction mixture was purified by flash column chromatography on silica gel and eluted with EtOAc/hexane (1/50 – 1/10) to afford the desired product **3a**.

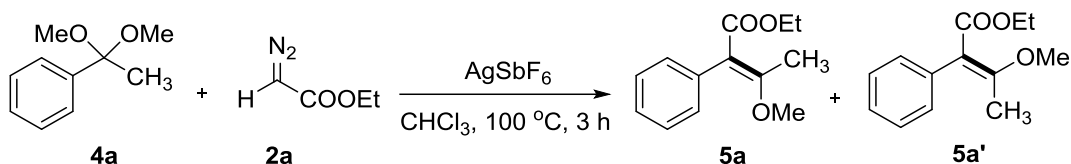

$\text{AgSbF}_6$  (1.7 mg, 0.005 mmol) was added into a 25 mL flame-dried Young-type tube in a glove box. Then ketal **4a** (83.0 mg, 0.5 mmol),  $\text{CHCl}_3$  (1.0 mL) and ethyl diazoacetate **2a** (114 mg, 1.0 mmol) were added into the tube under argon atmosphere. The mixture was stirred at  $100^\circ\text{C}$  for 3 hours. After cooling to room temperature, the solvent was removed under reduced pressure. The reaction mixture was purified by flash column chromatography on silica gel and eluted with EtOAc/hexane (1/50 – 1/5) to afford the desired product **5a** and **5a'**.

## 5. Experimental characterization data for products

**(E)-ethyl 3-methoxy-2-phenylacrylate (3a):** The title compound was prepared

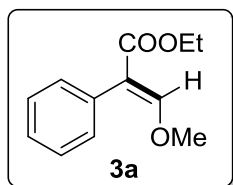

according to the general procedure and purified by flash column chromatography on silica gel to give the colorless oil, 83.4 mg, 81% yield.  $^1\text{H}$  NMR (400 MHz,  $\text{CDCl}_3$ )  $\delta$  1.29 (t,  $J = 7.2$  Hz, 3H), 3.84 (s, 3H), 4.24 (q,  $J = 7.2$  Hz, 2H), 7.23-7.29 (m, 1H), 7.34-7.35 (m, 4H), 7.54 (s, 1H);  $^{13}\text{C}$  NMR (100 MHz,  $\text{CDCl}_3$ )  $\delta$  14.4, 60.3, 61.9, 111.9, 127.1, 127.7, 130.2, 132.6, 159.4, 167.7; HRMS (ESI) calcd. for  $\text{C}_{12}\text{H}_{14}\text{NaO}_3$  [ $\text{M}+\text{Na}$ ]: 229.0835, found: 229.0837.

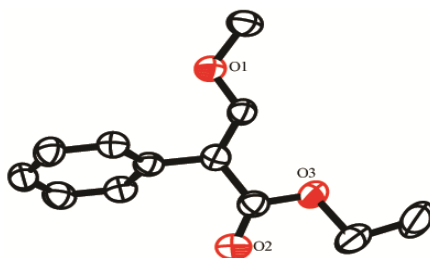

Figure S1. ORTEP drawing of product 3a

**(Z)-ethyl 3-methoxy-2-phenylacrylate (3a'):**  $^1\text{H}$  NMR (400 MHz,  $\text{CDCl}_3$ )  $\delta$  1.22 (t,  $J$

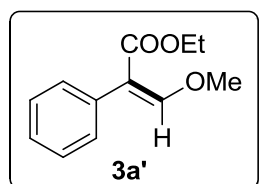

= 7.2 Hz, 3H), 3.82 (s, 3H), 4.20 (q,  $J = 7.2$  Hz, 2H), 6.56 (s, 1H), 7.16-7.25 (m, 5H);  $^{13}\text{C}$  NMR (100 MHz,  $\text{CDCl}_3$ )  $\delta$  14.3, 60.4, 62.3, 112.7, 127.0, 128.2, 128.9, 135.7, 157.6, 166.0; HRMS (ESI) calcd. for  $\text{C}_{12}\text{H}_{14}\text{NaO}_3$  [ $\text{M}+\text{Na}$ ]: 229.0835, found:

229.0834.

**(E)-ethyl 3-methoxy-2-(o-tolyl)acrylate (3b):** The title compound was prepared

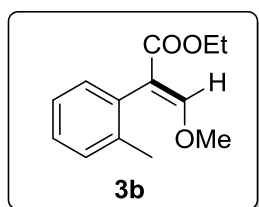

according to the general procedure and purified by flash column chromatography on silica gel to give the colorless oil, 97.8 mg, 89% yield.  $^1\text{H}$  NMR (400 MHz,  $\text{CDCl}_3$ )  $\delta$  1.25 (t,  $J = 6.8$  Hz, 3H), 2.19 (s, 3H), 3.82 (s, 3H), 4.21 (q,  $J = 7.2$  Hz, 2H), 7.10-7.11 (m, 1H), 7.16-7.26 (m, 3H), 7.55 (s, 1H);  $^{13}\text{C}$  NMR (100 MHz,  $\text{CDCl}_3$ )  $\delta$  14.4, 19.7, 60.2, 61.8, 111.6, 125.4, 127.7, 129.8, 130.7, 132.4, 137.2, 159.4, 167.7; HRMS (ESI) calcd. for  $\text{C}_{13}\text{H}_{16}\text{NaO}_3$  [ $\text{M}+\text{Na}$ ]: 243.0992, found: 243.1000.

**(E)-ethyl 3-methoxy-2-(*m*-tolyl)acrylate (3c):** The title compound was prepared

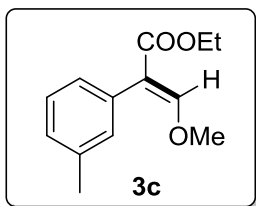

according to the general procedure and purified by flash column chromatography on silica gel to give the colorless oil, 94.0 mg, 85% yield.  $^1\text{H}$  NMR (400 MHz,  $\text{CDCl}_3$ )  $\delta$  1.29 (t,  $J = 7.2$  Hz, 3H), 2.34 (s, 3H), 3.81 (s, 3H), 4.23 (q,  $J = 7.2$  Hz, 2H), 7.06-7.14 (m, 3H), 7.21-7.25 (m, 1H), 7.52 (s, 1H);  $^{13}\text{C}$  NMR (100 MHz,  $\text{CDCl}_3$ )  $\delta$  14.4, 21.5, 60.3, 61.9, 112.0, 127.3, 127.7, 128.0, 130.9, 132.5, 137.2, 159.3, 167.8; HRMS (ESI) calcd. for  $\text{C}_{13}\text{H}_{16}\text{NaO}_3$  [ $\text{M}+\text{Na}$ ]: 243.0992, found: 243.0999.

**(E)-ethyl 3-methoxy-2-(*p*-tolyl)acrylate (3d):** The title compound was prepared

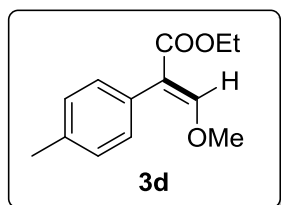

according to the general procedure and purified by flash column chromatography on silica gel to give the colorless oil, 101.2 mg, 92% yield.  $^1\text{H}$  NMR (400 MHz,  $\text{CDCl}_3$ )  $\delta$  1.29 (t,  $J = 7.2$  Hz, 3H), 2.34 (s, 3H), 3.84 (s, 3H), 4.24 (q,  $J = 7.2$  Hz, 2H), 7.17 (d,  $J = 8.0$  Hz, 2H), 7.22-7.24 (m, 2H), 7.52 (s, 1H);  $^{13}\text{C}$  NMR (100 MHz,  $\text{CDCl}_3$ )  $\delta$  14.4, 21.3, 60.3, 61.9, 111.8, 128.6, 129.6, 130.1, 136.8, 159.2, 167.8; HRMS (ESI) calcd. for  $\text{C}_{13}\text{H}_{16}\text{NaO}_3$  [ $\text{M}+\text{Na}$ ]: 243.0992, found: 243.1002.

**(E)-ethyl 2-(3,4-dimethylphenyl)-3-methoxyacrylate (3e):** The title compound was

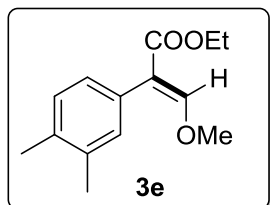

prepared according to the general procedure and purified by flash column chromatography on silica gel to give the colorless oil, 86.3 mg, 74% yield.  $^1\text{H}$  NMR (400 MHz,  $\text{CDCl}_3$ )  $\delta$  1.29 (t,  $J = 6.8$  Hz, 3H), 2.24-2.25 (m, 6H), 3.82 (s, 3H), 4.24 (q,  $J = 6.8$  Hz, 2H), 7.05-7.12 (m, 3H), 7.51 (s, 1H);  $^{13}\text{C}$  NMR (100 MHz,  $\text{CDCl}_3$ )  $\delta$  14.4, 19.6, 19.9, 60.3, 61.9, 112.0, 127.6, 129.2, 130.0, 131.3, 135.6, 135.9, 159.1, 167.9; HRMS (ESI) calcd. for  $\text{C}_{14}\text{H}_{18}\text{NaO}_3$  [ $\text{M}+\text{Na}$ ]: 257.1148, found: 257.1147.

**(E)-ethyl 3-methoxy-2-(4-methoxyphenyl)acrylate (3f):** The title compound was

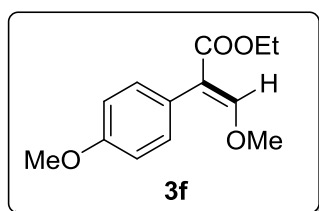

prepared according to the general procedure and purified by flash column chromatography on silica gel to give the colorless oil, 98.0 mg, 83% yield.  $^1\text{H}$  NMR (400 MHz,  $\text{CDCl}_3$ )  $\delta$  1.29 (t,  $J = 7.2$  Hz, 3H), 3.79 (s, 3H), 3.83 (s, 3H),

4.24 (q,  $J = 7.2$  Hz, 2H), 6.89 (d,  $J = 8.8$  Hz, 2H), 7.29 (d,  $J = 8.8$  Hz, 2H), 7.50 (s, 1H);  $^{13}\text{C}$  NMR (100 MHz,  $\text{CDCl}_3$ )  $\delta$  14.4, 55.2, 60.3, 61.9, 111.4, 113.3, 124.9, 131.3, 158.5, 159.0, 167.9; HRMS (ESI) calcd. for  $\text{C}_{13}\text{H}_{16}\text{NaO}_4$   $[\text{M}+\text{Na}]$ : 259.0941, found: 259.0953.

**(E)-ethyl 2-(2-chlorophenyl)-3-methoxyacrylate (3g):** The title compound was

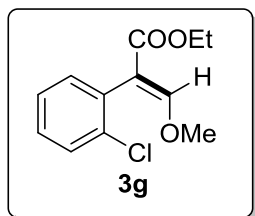

prepared according to the general procedure and purified by flash column chromatography on silica gel to give the colorless oil, 57.5 mg, 48% yield.  $^1\text{H}$  NMR (400 MHz,  $\text{CDCl}_3$ )  $\delta$  1.26 (t,  $J = 7.2$  Hz, 3H), 3.84 (s, 3H), 4.22 (q,  $J = 7.2$  Hz, 2H), 7.21-7.27 (m, 3H), 7.40-7.42 (m, 1H), 7.56 (s, 1H);  $^{13}\text{C}$  NMR (100 MHz,  $\text{CDCl}_3$ )  $\delta$  14.3, 60.4, 62.0, 110.2, 126.3, 128.9, 129.3, 132.1, 132.3, 134.5, 160.1, 167.0; HRMS (ESI) calcd. for  $\text{C}_{12}\text{H}_{13}\text{ClNaO}_3$   $[\text{M}+\text{Na}]$ : 263.0445, found: 263.0456.

**(E)-ethyl 2-(3-chlorophenyl)-3-methoxyacrylate (3h):** The title compound was

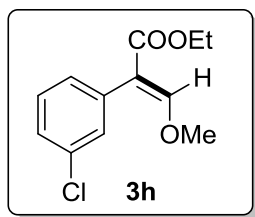

prepared according to the general procedure and purified by flash column chromatography on silica gel to give the colorless oil, 81.6 mg, 68% yield.  $^1\text{H}$  NMR (400 MHz,  $\text{CDCl}_3$ )  $\delta$  1.30 (t,  $J = 7.2$  Hz, 3H), 3.86 (s, 3H), 4.24 (q,  $J = 7.2$  Hz, 2H), 7.21-7.29 (m, 3H), 7.35 (s, 1H), 7.55 (s, 1H);  $^{13}\text{C}$  NMR (100 MHz,  $\text{CDCl}_3$ )  $\delta$  14.4, 60.5, 62.1, 110.6, 127.1, 128.4, 128.9, 130.3, 133.5, 134.4, 159.9, 167.2; HRMS (ESI) calcd. for  $\text{C}_{12}\text{H}_{13}\text{ClNaO}_3$   $[\text{M}+\text{Na}]$ : 263.0445, found: 263.0453.

**(E)-ethyl 2-(4-chlorophenyl)-3-methoxyacrylate (3i):** The title compound was

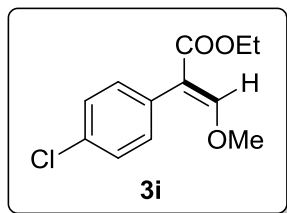

prepared according to the general procedure and purified by flash column chromatography on silica gel to give the white solid, 82.0 mg, 68% yield.  $^1\text{H}$  NMR (400 MHz,  $\text{CDCl}_3$ )  $\delta$  1.29 (t,  $J = 6.8$  Hz, 3H), 3.86 (s, 3H), 4.24 (q,  $J = 7.2$  Hz, 2H), 7.26-7.32 (m, 4H), 7.55 (s, 1H);  $^{13}\text{C}$  NMR (100 MHz,  $\text{CDCl}_3$ )  $\delta$  14.4, 60.4, 62.1, 110.8, 127.9, 131.0, 131.6, 132.8, 159.7, 167.3; HRMS (ESI) calcd. for  $\text{C}_{12}\text{H}_{13}\text{ClNaO}_3$   $[\text{M}+\text{Na}]$ : 263.0445, found: 263.0452.

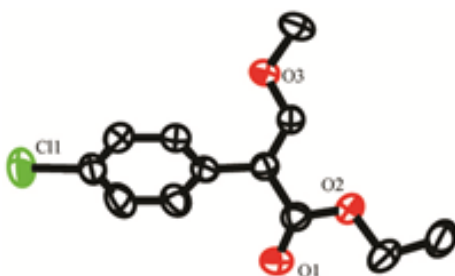

Figure S2. ORTEP drawing of product **3i**

**(*E*)-ethyl 2-(2-fluorophenyl)-3-methoxyacrylate (**3j**):** The title compound was

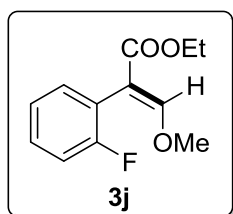

prepared according to the general procedure and purified by flash column chromatography on silica gel to give the colorless oil, 36.0 mg, 33% yield.  $^1\text{H}$  NMR (400 MHz,  $\text{CDCl}_3$ )  $\delta$  1.27 (t,  $J$  = 7.2 Hz, 3H), 3.86 (s, 3H), 4.23 (q,  $J$  = 7.2 Hz, 2H), 7.04–7.14 (m, 2H), 7.23–7.31 (m, 2H), 7.59 (s, 1H);  $^{13}\text{C}$  NMR (100 MHz,  $\text{CDCl}_3$ )  $\delta$  14.3, 60.4, 62.0, 106.2, 115.5 (d,  $J$  = 22.0 Hz), 120.6 (d,  $J$  = 16.1 Hz), 123.5 (d,  $J$  = 3.5 Hz), 129.3 (d,  $J$  = 8.2 Hz), 132.3 (d,  $J$  = 3.5 Hz), 160.4, 161.4 (d,  $J$  = 246.1 Hz), 167.0;  $^{19}\text{F}$  NMR (376 MHz,  $\text{CDCl}_3$ )  $\delta$  -112.5; HRMS (ESI) calcd. for  $\text{C}_{12}\text{H}_{13}\text{FNaO}_3$  [ $\text{M}+\text{Na}$ ]: 247.0741, found: 247.0729.

**(*E*)-methyl 4-(3-ethoxy-1-methoxy-3-oxoprop-1-en-2-yl)benzoate (**3k**):** The title

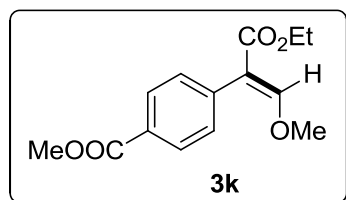

compound was prepared according to the general procedure and purified by flash column chromatography on silica gel to give the colorless oil, 34.2 mg, 26% yield.  $^1\text{H}$  NMR (400 MHz,  $\text{CDCl}_3$ )  $\delta$  1.21 (t,  $J$  = 6.8 Hz, 3H), 3.79 (s, 3H), 3.82 (s, 3H), 4.17 (q,  $J$  = 7.2 Hz, 2H), 7.37 (d,  $J$  = 8.8 Hz, 2H), 7.51 (s, 1H), 7.94 (d,  $J$  = 8.4 Hz, 2H);  $^{13}\text{C}$  NMR (100 MHz,  $\text{CDCl}_3$ )  $\delta$  14.4, 52.1, 60.5, 62.2, 111.0, 128.5, 129.0, 130.3, 137.7, 160.2, 167.1, 167.2; HRMS (ESI) calcd. for  $\text{C}_{14}\text{H}_{16}\text{NaO}_5$  [ $\text{M}+\text{Na}$ ]: 287.0890, found: 287.0900.

**(*E*)-ethyl 3-methoxy-2-(4-nitrophenyl)acrylate (**3l**):** The title compound was

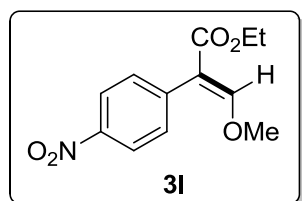

prepared according to the general procedure and purified by flash column chromatography on silica gel to give the colorless oil, 4.2 mg, 3% yield.  $^1\text{H}$  NMR (400 MHz,  $\text{CDCl}_3$ )  $\delta$  1.31 (t,  $J$  = 6.8 Hz, 3H), 3.93 (s, 3H), 4.27 (q,  $J$  = 7.2 Hz,

2H), 7.56 (d,  $J = 8.8$  Hz, 2H), 7.65 (s, 1H), 8.20 (d,  $J = 8.8$  Hz, 2H);  $^{13}\text{C}$  NMR (100 MHz,  $\text{CDCl}_3$ )  $\delta$  14.3, 60.7, 62.5, 110.0, 122.9, 131.1, 139.8, 146.5, 160.9, 166.6; HRMS (ESI) calcd. for  $\text{C}_{12}\text{H}_{13}\text{NNaO}_5$  [ $\text{M}+\text{Na}$ ]: 274.0686, found: 274.0693.

**Ethyl 2-diazo-3-methoxy-3-(4-nitrophenyl)propanoate (II')**: The title compound

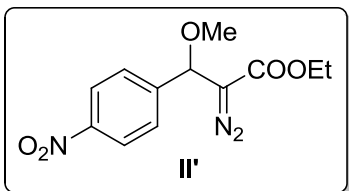

was prepared according to the general procedure and purified by flash column chromatography on silica gel to give the yellow oil, 8.5 mg, 7% yield.  $^1\text{H}$  NMR (400 MHz,  $\text{CDCl}_3$ )  $\delta$  1.33 (t,  $J = 7.2$  Hz, 3H), 3.48 (s, 3H),

4.32 (q,  $J = 7.2$  Hz, 2H), 5.46 (s, 1H), 7.58 (d,  $J = 8.8$  Hz, 2H), 8.26 (d,  $J = 8.8$  Hz, 2H);  $^{13}\text{C}$  NMR (100 MHz,  $\text{CDCl}_3$ )  $\delta$  14.4, 56.9, 61.4, 76.1, 124.0, 126.8, 145.7, 147.7, 165.5; HRMS (ESI) calcd. for  $\text{C}_{12}\text{H}_{13}\text{N}_3\text{NaO}_5$  [ $\text{M}+\text{Na}$ ]: 302.0747, found: 302.0749.

**(E)-ethyl 3-methoxy-2-(naphthalen-1-yl)acrylate (3m)**: The title compound was

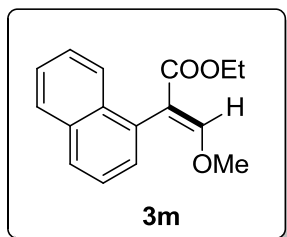

prepared according to the general procedure and purified by flash column chromatography on silica gel to give the colorless oil, 107.5 mg, 84% yield.  $^1\text{H}$  NMR (400 MHz,  $\text{CDCl}_3$ )  $\delta$  1.18 (t,  $J = 7.2$  Hz, 3H), 3.76 (s, 3H), 4.18 (q,  $J = 6.8$  Hz, 2H), 7.33-7.34 (m, 1H), 7.41-7.49 (m, 3H), 7.73-7.75

(m, 2H), 7.80-7.86 (m, 2H);  $^{13}\text{C}$  NMR (100 MHz,  $\text{CDCl}_3$ )  $\delta$  14.3, 60.3, 61.9, 110.4, 125.3, 125.5, 125.6, 125.8, 128.1, 128.3, 128.4, 130.7, 132.1, 133.6, 160.4, 168.0; HRMS (ESI) calcd. for  $\text{C}_{16}\text{H}_{16}\text{NaO}_3$  [ $\text{M}+\text{Na}$ ]: 279.0992, found: 279.1003.

**(E)-ethyl 3-methoxy-2-(naphthalen-2-yl)acrylate (3n)**: The title compound was

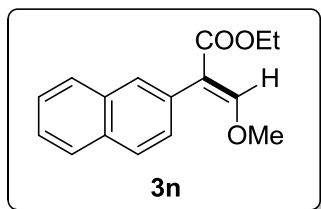

prepared according to the general procedure and purified by flash column chromatography on silica gel to give a white solid, 85.0 mg, 66% yield.  $^1\text{H}$  NMR (400 MHz,  $\text{CDCl}_3$ )  $\delta$  1.30 (t,  $J = 7.2$  Hz, 3H), 3.85 (s, 3H), 4.27 (q,  $J$

$= 6.8$  Hz, 2H), 7.42-7.46 (m, 3H), 7.62 (s, 1H), 7.79-7.82 (m, 4H);  $^{13}\text{C}$  NMR (100 MHz,  $\text{CDCl}_3$ )  $\delta$  14.4, 60.4, 62.0, 111.9, 125.7, 125.8, 127.1, 127.6, 128.1, 128.3, 129.3, 130.2, 132.5, 133.1, 159.7, 167.8; HRMS (ESI) calcd. for  $\text{C}_{16}\text{H}_{16}\text{NaO}_3$  [ $\text{M}+\text{Na}$ ]: 279.0992, found: 279.0993.

**(E)-ethyl 2-benzyl-3-ethoxyacrylate (3o):** The title compound was prepared

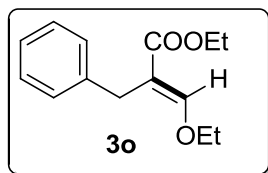

according to the general procedure and purified by flash column chromatography on silica gel to give the colorless oil, 39.8 mg, 34% yield.  $^1\text{H}$  NMR (400 MHz,  $\text{CDCl}_3$ )  $\delta$  1.24 (t,  $J$  = 7.2 Hz, 3H), 1.36 (t,  $J$  = 7.2 Hz, 3H), 3.59 (s, 2H), 4.10 (q,  $J$  = 3.6 Hz, 2H), 4.15 (q,  $J$  = 7.2 Hz, 2H), 7.13-7.28 (m, 5H), 7.46 (s, 1H);  $^{13}\text{C}$  NMR (100 MHz,  $\text{CDCl}_3$ )  $\delta$  14.3, 15.5, 29.8, 59.9, 70.1, 110.3, 125.7, 128.1, 128.6, 141.0, 157.8, 168.3; HRMS (ESI) calcd. for  $\text{C}_{14}\text{H}_{18}\text{NaO}_3$  [ $\text{M}+\text{Na}$ ]: 257.1148, found: 257.1145.

**(Z)-ethyl 2-benzyl-3-ethoxyacrylate (3o'):**  $^1\text{H}$  NMR (400 MHz,  $\text{CDCl}_3$ )  $\delta$  1.30 (t,  $J$  =

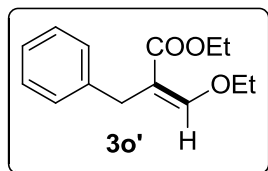

7.2 Hz, 3H), 1.36 (t,  $J$  = 7.2 Hz, 3H), 3.31 (s, 2H), 3.93 (q,  $J$  = 6.8 Hz, 2H), 4.22 (q,  $J$  = 7.2 Hz, 2H), 5.79 (s, 1H), 7.16-7.22 (m, 3H), 7.26-7.31 (m, 2H);  $^{13}\text{C}$  NMR (100 MHz,  $\text{CDCl}_3$ )  $\delta$  14.2, 14.5, 37.7, 60.9, 63.1, 102.9, 125.8, 128.3, 128.7, 137.0, 152.0, 170.6; HRMS (ESI) calcd. for  $\text{C}_{14}\text{H}_{18}\text{NaO}_3$  [ $\text{M}+\text{Na}$ ]: 257.1148, found: 257.1138.

**(E)-methyl 3-methoxy-2-(o-tolyl)acrylate (3p):**  $^1\text{H}$  NMR (400 MHz,  $\text{CDCl}_3$ )  $\delta$  2.18

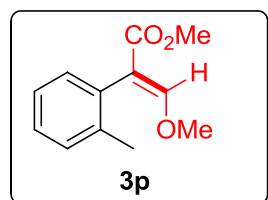

(s, 3H), 3.69 (s, 3H), 3.81 (s, 3H), 7.10-7.11 (m, 1H), 7.16-7.23 (m, 3H), 7.56 (s, 1H);  $^{13}\text{C}$  NMR (100 MHz,  $\text{CDCl}_3$ )  $\delta$  19.7, 51.6, 61.8, 111.3, 125.4, 127.8, 129.8, 130.6, 132.3, 137.2, 159.6, 168.3.

**(E)-methyl 2-(2-(bromomethyl)phenyl)-3-methoxyacrylate (3q):**  $^1\text{H}$  NMR (400

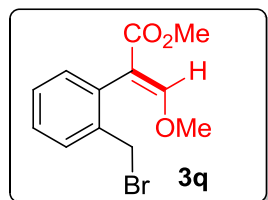

MHz,  $\text{CDCl}_3$ )  $\delta$  3.70 (s, 3H), 3.83 (s, 3H), 4.41 (s, 2H), 7.11-7.16 (m, 1H), 7.28-7.34 (m, 2H), 7.45-7.49 (m, 1H), 7.64 (s, 1H);  $^{13}\text{C}$  NMR (100 MHz,  $\text{CDCl}_3$ )  $\delta$  31.9, 51.7, 62.0, 109.8, 128.5, 130.3, 131.5, 132.6, 136.6, 160.5, 167.8.

**(E)-methyl 3-methoxy-2-phenylacrylate (3r):**  $^1\text{H}$  NMR (400 MHz,  $\text{CDCl}_3$ )  $\delta$  3.73 (s,

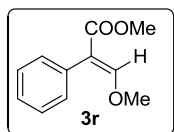

3H), 3.84 (s, 3H), 7.25-7.29 (m, 1H), 7.31-7.37 (m, 4H), 7.56 (s, 1H);  $^{13}\text{C}$  NMR (100 MHz,  $\text{CDCl}_3$ )  $\delta$  51.6, 62.0, 111.6, 127.2, 127.8, 130.2, 132.5, 159.7, 168.2.

**(Z)-methyl 3-methoxy-2-phenylacrylate (3r')**:  $^1\text{H}$  NMR (400 MHz,  $\text{CDCl}_3$ )  $\delta$  3.76 (s, 3H), 3.91 (s, 3H), 6.66 (s, 1H), 7.25-7.34 (m, 5H);  $^{13}\text{C}$  NMR (100 MHz,  $\text{CDCl}_3$ )  $\delta$  51.6, 62.4, 112.2, 127.1, 128.2, 129.0, 135.6, 158.1, 166.4.

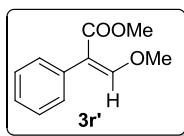

**(E)-ethyl 3-methoxy-2-phenylbut-2-enoate (5a)**: The title compound was prepared according to the general procedure and purified by flash column chromatography on silica gel to give the colorless oil, (**5a+5a'**) 90.3 mg, 82% yield,  $E/Z$  = 4:1.  $^1\text{H}$  NMR (400 MHz,  $\text{CDCl}_3$ )  $\delta$  1.18 (t,  $J$  = 7.2 Hz, 3H), 2.49 (s, 3H), 3.61 (s, 3H), 4.15 (q,  $J$  = 7.2 Hz, 2H), 7.16-7.29 (m, 3H), 7.29-7.33 (m, 2H);  $^{13}\text{C}$  NMR (100 MHz,  $\text{CDCl}_3$ )  $\delta$  14.2, 15.2, 55.3, 60.1, 112.9, 126.3, 127.6, 130.3, 136.2, 165.1, 169.0; HRMS (ESI) calcd. for  $\text{C}_{13}\text{H}_{16}\text{O}_3\text{Na}$  [ $\text{M}+\text{Na}$ ]: 243.0992, found: 243.0990.

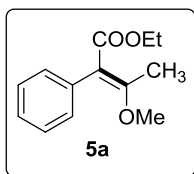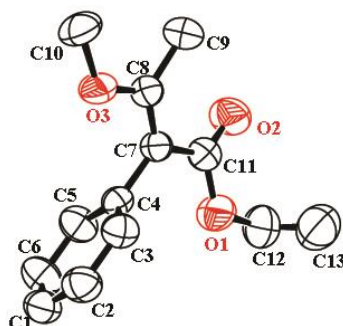

Figure S3. ORTEP drawing of product **5a**

**(Z)-ethyl 3-methoxy-2-phenylbut-2-enoate (5a')**:  $^1\text{H}$  NMR (400 MHz,  $\text{CDCl}_3$ )  $\delta$  1.22 (t,  $J$  = 7.2 Hz, 3H), 1.89 (s, 3H), 3.79 (s, 3H), 4.18 (q,  $J$  = 6.8 Hz, 2H), 7.20-7.28 (m, 3H), 7.31-7.35 (m, 2H);  $^{13}\text{C}$  NMR (100 MHz,  $\text{CDCl}_3$ )  $\delta$  14.2, 15.5, 56.1, 60.2, 113.6, 126.9, 128.2, 130.3, 136.9, 160.8, 167.4; HRMS (ESI) calcd. for  $\text{C}_{13}\text{H}_{16}\text{O}_3\text{Na}$  [ $\text{M}+\text{Na}$ ]: 243.0992, found: 243.0990.

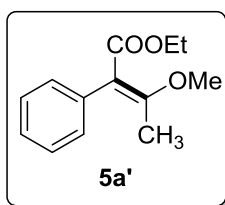

**(E)-ethyl 3-methoxy-2-(p-tolyl)but-2-enoate (5b)**: The title compound was prepared according to the general procedure and purified by flash column chromatography on silica gel to give the colorless oil, (**5b+5b'**) 105.6 mg, 90% yield,  $E/Z$  = 3:1.  $^1\text{H}$  NMR (400 MHz,  $\text{CDCl}_3$ )  $\delta$  1.19 (t,  $J$  = 6.8 Hz, 3H), 2.34 (s, 3H), 2.47 (s, 3H), 3.61 (s, 3H),

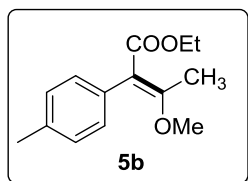

4.15 (q,  $J = 7.2$  Hz, 2H), 7.08 (d,  $J = 8.0$  Hz, 2H), 7.13 (d,  $J = 8.0$  Hz, 2H);  $^{13}\text{C}$  NMR (100 MHz,  $\text{CDCl}_3$ )  $\delta$  14.3, 15.3, 21.3, 55.3, 60.1, 112.7, 128.5, 130.1, 133.1, 135.9, 164.9, 169.2; HRMS (ESI) calcd. for  $\text{C}_{14}\text{H}_{18}\text{O}_3\text{Na}$   $[\text{M}+\text{Na}]$ : 257.1148, found: 257.1145.

**(Z)-ethyl 3-methoxy-2-(p-tolyl)but-2-enoate (5b')**:  $^1\text{H}$  NMR (400 MHz,  $\text{CDCl}_3$ )  $\delta$

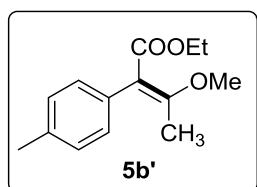

1.22 (t,  $J = 7.2$  Hz, 3H), 1.88 (s, 3H), 2.34 (s, 3H), 3.77 (s, 3H), 4.18 (q,  $J = 7.2$  Hz, 2H), 7.11 (d,  $J = 8.4$  Hz, 2H), 7.14 (d,  $J = 8.4$  Hz, 2H);  $^{13}\text{C}$  NMR (100 MHz,  $\text{CDCl}_3$ )  $\delta$  14.3, 15.4, 21.2, 56.1, 60.2, 113.6, 128.9, 130.0, 133.8, 136.5, 160.3, 167.6;

HRMS (ESI) calcd. for  $\text{C}_{14}\text{H}_{18}\text{O}_3\text{Na}$   $[\text{M}+\text{Na}]$ : 257.1148, found: 257.1148.

**(E)-ethyl 3-methoxy-2-(4-methoxyphenyl)but-2-enoate (5c)**: The title compound

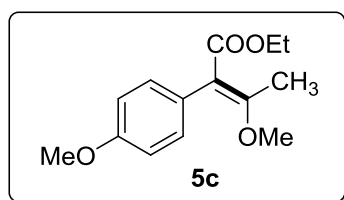

was prepared according to the general procedure and purified by flash column chromatography on silica gel to give the colorless oil, (**5c**+**5c'**) 95.8 mg, 77% yield,  $E/Z = 2:1$ .  $^1\text{H}$  NMR (400 MHz,  $\text{CDCl}_3$ )  $\delta$  1.20 (t,  $J = 6.8$  Hz,

3H), 2.46 (s, 3H), 3.62 (s, 3H), 3.81 (s, 3H), 4.16 (q,  $J = 7.2$  Hz, 2H), 6.87 (d,  $J = 8.8$  Hz, 2H), 7.12 (d,  $J = 8.4$  Hz, 2H);  $^{13}\text{C}$  NMR (100 MHz,  $\text{CDCl}_3$ )  $\delta$  14.3, 15.3, 55.1, 55.3, 60.1, 112.4, 113.1, 128.4, 131.3, 158.0, 164.7, 169.3; HRMS (ESI) calcd. for  $\text{C}_{14}\text{H}_{18}\text{O}_4\text{Na}$   $[\text{M}+\text{Na}]$ : 273.1097, found: 273.1096.

**(Z)-ethyl 3-methoxy-2-(4-methoxyphenyl)but-2-enoate (5c')**:  $^1\text{H}$  NMR (400 MHz,

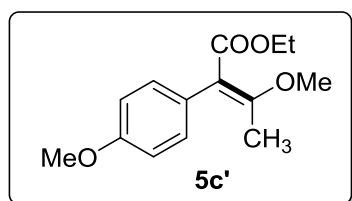

$\text{CDCl}_3$ )  $\delta$  1.23 (t,  $J = 6.8$  Hz, 3H), 1.88 (s, 3H), 3.78 (s, 3H), 3.81 (s, 3H), 4.18 (q,  $J = 6.8$  Hz, 2H), 6.87 (d,  $J = 8.8$  Hz, 2H), 7.14 (d,  $J = 8.8$  Hz, 2H);  $^{13}\text{C}$  NMR (100 MHz,  $\text{CDCl}_3$ )  $\delta$  14.3, 15.4, 55.2, 56.1, 60.2, 113.2, 113.6,

129.1, 131.3, 158.5, 160.4, 167.7; HRMS (ESI) calcd. for  $\text{C}_{14}\text{H}_{18}\text{O}_4\text{Na}$   $[\text{M}+\text{Na}]$ : 273.1097, found: 273.1094.

**(E)-ethyl 2-(4-fluorophenyl)-3-methoxybut-2-enoate (5d):** The title compound was

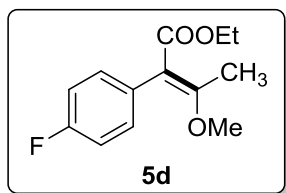

prepared according to the general procedure and purified by flash column chromatography on silica gel to give the colorless oil, (**5d**+**5d'**) 90.6 mg, 76% yield, *E/Z* = 3:1. <sup>1</sup>H NMR (400 MHz, CDCl<sub>3</sub>) δ 1.18 (t, *J* = 6.8 Hz, 3H), 2.49 (s, 3H), 3.62 (s, 3H), 4.14 (q, *J* = 6.8 Hz, 2H), 6.97-7.01 (m, 2H), 7.11-7.15 (m, 2H); <sup>13</sup>C NMR (100 MHz, CDCl<sub>3</sub>) δ 14.2, 15.1, 55.2, 60.1, 111.7, 114.6 (d, *J* = 21.0 Hz), 131.9 (d, *J* = 7.9 Hz), 132.1 (d, *J* = 3.5 Hz), 162.6 (d, *J* = 243.1 Hz), 165.7, 168.8; <sup>19</sup>F NMR (376 MHz, CDCl<sub>3</sub>) δ -116.5; HRMS (ESI) calcd. for C<sub>13</sub>H<sub>15</sub>FO<sub>3</sub>Na [M+Na]: 261.0897, found: 261.0891.

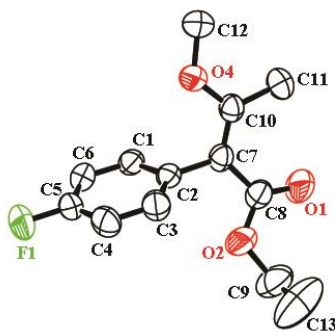

**Figure S4.** ORTEP drawing of product **5d**

**(Z)-ethyl 2-(4-fluorophenyl)-3-methoxybut-2-enoate (5d'):** δ 1.22 (t, *J* = 7.2 Hz, 3H),

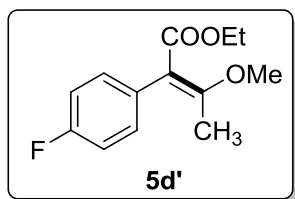

1.87 (s, 3H), 3.80 (s, 3H), 4.17 (q, *J* = 7.2 Hz, 2H), 6.98-7.04 (m, 2H), 7.14-7.20 (m, 2H); <sup>13</sup>C NMR (100 MHz, CDCl<sub>3</sub>) δ 14.2, 15.6, 56.2, 60.2, 112.3, 115.2 (d, *J* = 21.2 Hz), 132.0 (d, *J* = 7.9 Hz), 132.9 (d, *J* = 3.5 Hz), 161.4, 163.1 (d, *J* = 244.2 Hz), 167.1; <sup>19</sup>F NMR (376 MHz, CDCl<sub>3</sub>) δ -115.6; HRMS (ESI) calcd. for C<sub>13</sub>H<sub>15</sub>FO<sub>3</sub>Na [M+Na]: 261.0897, found: 261.0892.

**(E)-ethyl 2-(4-chlorophenyl)-3-methoxybut-2-enoate (5e):** The title compound was

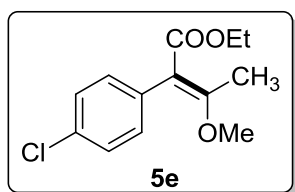

prepared according to the general procedure and purified by flash column chromatography on silica gel to give the colorless oil, (**5e**+**5e'**) 97.7 mg, 77% yield, *E/Z* = 4:1. <sup>1</sup>H NMR (400 MHz, CDCl<sub>3</sub>) δ 1.18 (t, *J* = 7.2 Hz, 3H), 2.50 (s,

3H), 3.63 (s, 3H), 4.14 (q,  $J = 7.2$  Hz, 2H), 7.11 (d,  $J = 8.8$  Hz, 2H), 7.28 (d,  $J = 8.4$  Hz, 2H);  $^{13}\text{C}$  NMR (100 MHz,  $\text{CDCl}_3$ )  $\delta$  14.2, 15.1, 55.2, 60.1, 111.5, 127.9, 131.8, 132.1, 134.7, 165.9, 168.5; HRMS (ESI) calcd. for  $\text{C}_{13}\text{H}_{15}\text{ClO}_3\text{Na}$  [ $\text{M}+\text{Na}$ ]: 277.0602, found: 277.0595.

**(Z)-ethyl 2-(4-chlorophenyl)-3-methoxybut-2-enoate (5e')**:  $^1\text{H}$  NMR (400 MHz,

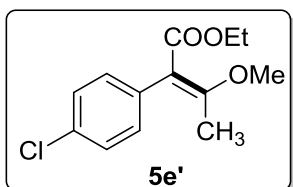

$\text{CDCl}_3$ )  $\delta$  1.21 (t,  $J = 7.2$  Hz, 3H), 1.88 (s, 3H), 3.80 (s, 3H), 4.17 (q,  $J = 6.8$  Hz, 2H), 7.15 (d,  $J = 8.4$  Hz, 2H), 7.31 (d,  $J = 8.4$  Hz, 2H);  $^{13}\text{C}$  NMR (100 MHz,  $\text{CDCl}_3$ )  $\delta$  14.2, 15.6, 56.2, 60.2, 112.2, 128.4, 131.7, 132.9, 135.5, 161.7, 166.9; HRMS

(ESI) calcd. for  $\text{C}_{13}\text{H}_{16}\text{ClO}_3$  [ $\text{M}+\text{H}$ ]: 255.0782, found: 255.0790.

**(E)-ethyl 2-(4-bromophenyl)-3-methoxybut-2-enoate (5f)**: The title compound was

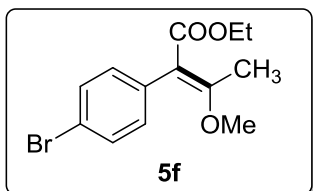

prepared according to the general procedure and purified by flash column chromatography on silica gel to give the colorless oil, (**5f**+**5f'**) 101.6 mg, 68% yield,  $E/Z = 3:1$ .  $^1\text{H}$  NMR (400 MHz,  $\text{CDCl}_3$ )  $\delta$  1.18 (t,  $J = 6.8$  Hz, 3H), 2.49 (s,

3H), 3.62 (s, 3H), 4.14 (q,  $J = 7.2$  Hz, 2H), 7.06 (d,  $J = 8.4$  Hz, 2H), 7.43 (d,  $J = 8.4$  Hz, 2H);  $^{13}\text{C}$  NMR (100 MHz,  $\text{CDCl}_3$ )  $\delta$  14.3, 15.1, 55.2, 60.1, 111.5, 120.3, 130.8, 132.2, 135.3, 165.9, 168.4; HRMS (ESI) calcd. for  $\text{C}_{13}\text{H}_{15}\text{BrO}_3\text{Na}$  [ $\text{M}+\text{Na}$ ]: 321.0097, found: 321.0087.

**(Z)-ethyl 2-(4-bromophenyl)-3-methoxybut-2-enoate (5f')**:  $^1\text{H}$  NMR (400 MHz,

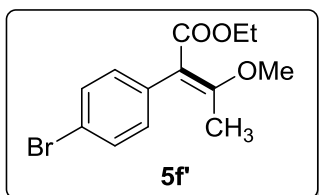

$\text{CDCl}_3$ )  $\delta$  1.21 (t,  $J = 7.2$  Hz, 3H), 1.88 (s, 3H), 3.80 (s, 3H), 4.17 (q,  $J = 7.2$  Hz, 2H), 7.09 (d,  $J = 8.4$  Hz, 2H), 7.46 (d,  $J = 8.4$  Hz, 2H);  $^{13}\text{C}$  NMR (100 MHz,  $\text{CDCl}_3$ )  $\delta$  14.2, 15.7, 56.2, 60.3, 112.1, 121.0, 131.4, 132.1, 136.0, 161.7, 166.8;

HRMS (ESI) calcd. for  $\text{C}_{13}\text{H}_{15}\text{BrO}_3\text{Na}$  [ $\text{M}+\text{Na}$ ]: 321.0097, found: 321.0085.

**(E)-ethyl 3-methoxy-2-(naphthalen-1-yl)but-2-enoate (5g)**: The title compound was

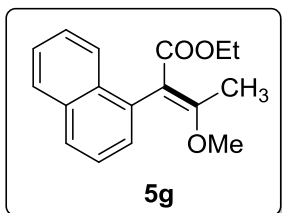

prepared according to the general procedure and purified by flash column chromatography on silica gel to give the colorless oil, (**5g**+**5g'**) 54.2 mg, 40% yield,  $E/Z = 2:1$ .  $^1\text{H}$

NMR (400 MHz, CDCl<sub>3</sub>)  $\delta$  0.99 (t,  $J$  = 7.2 Hz, 3H), 2.65 (s, 3H), 3.49 (s, 3H), 4.04 (q,  $J$  = 7.2 Hz, 2H), 7.26 (d,  $J$  = 3.6 Hz, 1H), 7.27-7.47 (m, 3H), 7.73-7.78 (m, 2H), 7.82-7.85 (m, 1H); <sup>13</sup>C NMR (100 MHz, CDCl<sub>3</sub>)  $\delta$  14.1, 15.2, 55.3, 59.9, 110.1, 125.3, 125.4, 125.4, 125.5, 127.1, 127.9, 128.2, 132.7, 133.6, 134.4, 167.3, 168.9; HRMS (ESI) calcd. for C<sub>17</sub>H<sub>18</sub>O<sub>3</sub>Na [M+Na]: 293.1148, found: 293.1145.

**(Z)-ethyl 3-methoxy-2-(naphthalen-1-yl)but-2-enoate (5g')**: <sup>1</sup>H NMR (400 MHz,

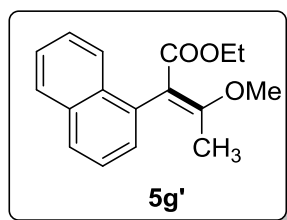

CDCl<sub>3</sub>)  $\delta$  1.07 (t,  $J$  = 7.2 Hz, 3H), 1.72 (s, 3H), 3.89 (s, 3H), 4.08 (q,  $J$  = 6.8 Hz, 2H), 7.33-7.35 (m, 1H), 7.43-7.49 (m, 3H), 7.79-7.87 (m, 2H), 7.91-7.94 (m, 1H); <sup>13</sup>C NMR (100 MHz, CDCl<sub>3</sub>)  $\delta$  14.2, 16.0, 56.3, 59.9, 110.0, 125.5, 125.5,

125.7, 126.1, 127.8, 128.3, 128.5, 133.0, 133.8, 134.9, 163.6, 166.9; HRMS (ESI) calcd. for C<sub>17</sub>H<sub>18</sub>O<sub>3</sub>Na [M+Na]: 293.1148, found: 293.1150.

**(E)-ethyl 3-methoxy-2-(naphthalen-2-yl)but-2-enoate (5h)**: The title compound was

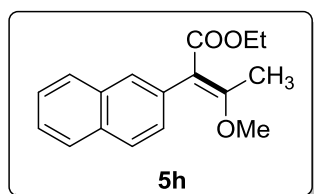

prepared according to the general procedure and purified by flash column chromatography on silica gel to give the colorless oil, (**5h**+**5h'**) 110.8 mg, 82% yield,  $E/Z$  = 3:1. <sup>1</sup>H NMR (400 MHz, CDCl<sub>3</sub>)  $\delta$  1.12-1.16 (m, 3H), 2.52 (s, 3H),

3.58 (s, 3H), 4.09-4.15 (m, 2H), 7.30-7.32 (m, 1H), 7.41-7.43 (m, 2H), 7.65 (s, 1H), 7.76-7.81 (m, 3H); <sup>13</sup>C NMR (100 MHz, CDCl<sub>3</sub>)  $\delta$  14.3, 15.3, 55.4, 60.1, 112.7, 125.5, 125.6, 126.9, 127.6, 128.0, 129.0, 129.1, 132.2, 133.3, 133.9, 165.8, 169.0; HRMS (ESI) calcd. for C<sub>17</sub>H<sub>18</sub>O<sub>3</sub>Na [M+Na]: 293.1148, found: 293.1144.

**(Z)-ethyl 3-methoxy-2-(naphthalen-2-yl)but-2-enoate (5h')**: <sup>1</sup>H NMR (400 MHz,

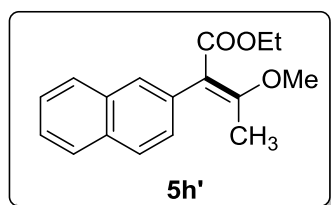

CDCl<sub>3</sub>)  $\delta$  1.21 (t,  $J$  = 7.2 Hz, 3H), 1.93 (s, 3H), 3.83 (s, 3H), 4.19 (q,  $J$  = 7.2 Hz, 2H), 7.33-7.36 (m, 1H), 7.44-7.49 (m, 2H), 7.67 (m, 1H), 7.79-7.84 (m, 3H); <sup>13</sup>C NMR (100 MHz, CDCl<sub>3</sub>)  $\delta$  14.3, 15.7, 56.2, 60.2, 113.4,

125.9, 126.0, 127.6, 127.7, 127.9, 128.6, 129.0, 132.3, 133.3, 134.5, 161.4, 167.4; HRMS (ESI) calcd. for C<sub>17</sub>H<sub>18</sub>O<sub>3</sub>Na [M+Na]: 293.1148, found: 293.1145.

**(E)-ethyl 3-methoxy-2,4-diphenylbut-2-enoate (5i):** The title compound was

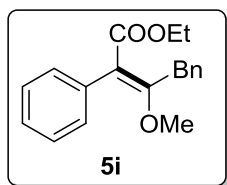

prepared according to the general procedure and purified by flash column chromatography on silica gel to give the colorless oil, (**5i+5i'**) 77.6 mg, 52% yield, *E/Z* = 2:1. <sup>1</sup>H NMR (400 MHz, CDCl<sub>3</sub>) δ 1.26 (t, *J* = 7.2 Hz, 3H), 3.72 (s, 3H), 4.13-4.26 (m, 2H),

4.92 (s, 1H), 5.84 (s, 1H), 7.17-7.25 (m, 3H), 7.26-7.33 (m, 7H); <sup>13</sup>C NMR (100 MHz, CDCl<sub>3</sub>) δ 14.2, 52.4, 55.2, 61.2, 102.3, 126.1, 127.2, 128.3, 128.4, 129.1, 129.1, 136.6, 136.8, 155.5, 171.1; HRMS (ESI) calcd. for C<sub>19</sub>H<sub>20</sub>O<sub>3</sub>Na [M+Na]: 319.1305, found: 319.1296.

**Ethyl 3-methoxy-2,4-diphenylbut-2-enoate (5i+5i'):** <sup>1</sup>H NMR (400 MHz, CDCl<sub>3</sub>) δ

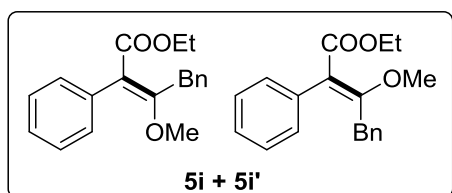

1.22-1.29 (m, 3H), 3.58 (s, 1.1H), 3.72 (s, 1.9H), 4.12-4.29 (m, 2H), 4.66 (s, 0.4H), 4.92 (s, 0.6H), 5.61 (s, 0.4H), 5.83 (s, 0.6H), 7.14-7.50 (m, 10H); <sup>13</sup>C NMR (100 MHz, CDCl<sub>3</sub>) δ 14.2, 14.2,

52.4, 55.2, 56.0, 58.0, 61.2, 61.4, 102.3, 112.8, 126.1, 126.6, 127.2, 127.8, 128.2, 128.3, 128.4, 128.7, 128.7, 129.1, 129.1, 135.3, 135.9, 136.6, 136.8, 154.9, 155.5, 171.1, 171.2; HRMS (ESI) calcd. for C<sub>19</sub>H<sub>20</sub>O<sub>3</sub>Na [M+Na]: 319.1305, found: 319.1299.

**Ethyl 3-methoxy-2,3-diphenylacrylate (5j+5j'):** The title compound was prepared

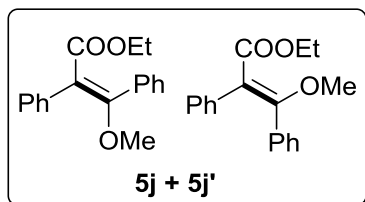

according to the general procedure and purified by flash column chromatography on silica gel to give the colorless oil, (**5j+5j'**) 95.5 mg, 68% yield, *E/Z* = 1:1.

<sup>1</sup>H NMR (400 MHz, CDCl<sub>3</sub>) δ 0.88 (t, *J* = 7.2 Hz, 1.7H), 1.32 (t, *J* = 7.2 Hz, 1.3H), 3.39 (s, 1.8H), 3.52 (s, 1.2H), 3.93 (q, *J* = 6.8 Hz, 1.1H), 4.32 (q, *J* = 7.2 Hz, 0.8H), 7.02-7.04 (m, 0.8H), 7.04-7.13 (m, 1.2H), 7.21-7.30 (m, 3H), 7.35-7.43 (m, 5H); <sup>13</sup>C NMR (100 MHz, CDCl<sub>3</sub>) δ 13.6, 14.3, 57.8, 58.2, 60.4, 60.8, 116.6, 118.9, 126.8, 127.0, 128.0, 128.0, 128.2, 128.3, 128.9, 129.1, 129.3, 129.6, 130.1, 130.1, 132.8, 134.6, 135.3, 135.4, 159.0, 162.2, 168.6, 169.1; HRMS (ESI) calcd. for C<sub>18</sub>H<sub>18</sub>O<sub>3</sub>Na [M+Na]: 305.1148, found: 305.1142.

Ethyl

**3-(4-fluorophenyl)-3-methoxy-2-(4-methoxyphenyl)acrylate/ethyl**

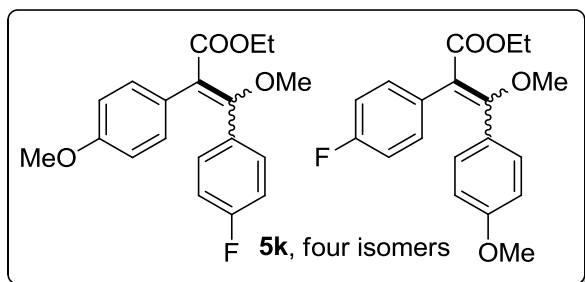

**2-(4-fluorophenyl)-3-methoxy-3-(4-**

**methoxyphenyl)acrylate (5k):** The

title compound was prepared according to the general procedure and purified by flash column

chromatography on silica gel to give

the colorless oil, 103.0 mg, 62% yield, *isomer ratio* = 2:2:1:1.  $^1\text{H}$  NMR (400 MHz,  $\text{CDCl}_3$ )  $\delta$  0.91-0.95 (m, 1.8H), 1.28-1.33 (m, 1.2H), 3.39 (s, 0.8H), 3.39 (s, 0.8H), 3.51 (s, 0.5H), 3.53 (s, 0.5H), 3.74 (s, 0.5H), 3.77 (s, 0.5H), 3.82 (s, 0.9H), 3.85 (s, 1H), 3.96 (q,  $J$  = 7.2 Hz, 1.2H), 4.25-4.32 (m, 0.7H), 6.68-7.42 (m, 8H);  $^{13}\text{C}$  NMR (100 MHz,  $\text{CDCl}_3$ )  $\delta$  13.7, 13.8, 14.3, 55.1, 55.2, 55.2, 55.3, 57.7, 57.9, 58.3, 58.3, 60.4, 60.5, 60.8, 60.9, 113.6, 113.7, 113.7, 113.8, 114.8, 114.9, 115.0, 115.2, 115.3, 115.5, 115.5, 116.7, 116.8, 119.0, 124.7, 126.5, 127.3, 127.5, 129.0, 130.3, 130.7, 130.8, 130.8, 131.1, 131.3, 131.3, 131.6, 131.8, 131.9, 131.9, 132.0, 132.0, 157.0, 158.6, 158.6, 160.0, 160.2, 160.5, 160.5, 161.6, 162.0, 162.6, 162.8, 162.9, 164.1, 164.5, 168.6, 168.8, 169.1, 169.3;  $^{19}\text{F}$  NMR (376 MHz,  $\text{CDCl}_3$ )  $\delta$  -115.4, -115.4, -111.3, -111.2; HRMS (ESI) calcd. for  $\text{C}_{19}\text{H}_{19}\text{FNaO}_4$  [ $\text{M}+\text{Na}$ ]: 353.1160, found: 353.1156.

**(E)-ethyl 3-ethoxy-2-phenylbut-2-enoate (5l):** The title compound was prepared

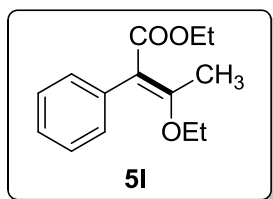

according to the general procedure and purified by flash column chromatography on silica gel to give the colorless oil,

**(5l+5l')** 104.3 mg, 89% yield, *E/Z* = 3:1.  $^1\text{H}$  NMR (400 MHz,  $\text{CDCl}_3$ )  $\delta$  1.14 (t,  $J$  = 6.8 Hz, 3H), 1.19 (t,  $J$  = 7.2 Hz, 3H),

2.45 (s, 3H), 3.92 (q,  $J$  = 6.8 Hz, 2H), 4.15 (q,  $J$  = 6.8 Hz, 2H), 7.18-7.23 (m, 3H), 7.27-7.31 (m, 2H);  $^{13}\text{C}$  NMR (100 MHz,  $\text{CDCl}_3$ )  $\delta$  14.3, 15.1, 15.9, 60.0, 63.6, 113.5, 126.2, 127.5, 130.3, 136.4, 164.5, 169.2; HRMS (ESI) calcd. for  $\text{C}_{14}\text{H}_{19}\text{O}_3$  [ $\text{M}+\text{H}$ ]: 235.1329, found: 235.1318.

**(Z)-ethyl 3-ethoxy-2-phenylbut-2-enoate (5l')**:  $^1\text{H}$  NMR (400 MHz,  $\text{CDCl}_3$ )  $\delta$  1.25 (t,

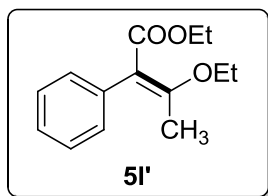

$J = 6.8$  Hz, 3H), 1.38 (t,  $J = 7.2$  Hz, 3H), 1.88 (s, 3H), 4.06 (q,  $J = 6.8$  Hz, 2H), 4.20 (q,  $J = 7.2$  Hz, 2H), 7.22-7.27 (m, 3H), 7.31-7.37 (m, 2H);  $^{13}\text{C}$  NMR (100 MHz,  $\text{CDCl}_3$ )  $\delta$  14.3, 15.3, 15.9, 60.2, 64.4, 114.5, 126.9, 128.2, 130.2, 136.8, 159.6,

167.7; HRMS (ESI) calcd. for  $\text{C}_{14}\text{H}_{19}\text{O}_3$   $[\text{M}+\text{H}]$ : 235.1329, found: 235.1328.

**(E)-ethyl 2-(furan-2-yl)-3-methoxybut-2-enoate (5m)**: The title compound was

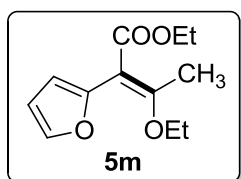

prepared according to the general procedure and purified by flash column chromatography on silica gel to give the colorless oil, (**5m**+**5m'**) 74.9 mg, 67% yield,  $E/Z = 2:1$ .  $^1\text{H}$  NMR (400 MHz,  $\text{CDCl}_3$ )  $\delta$  1.27 (t,  $J = 7.2$  Hz, 3H), 1.30 (t,  $J = 6.8$  Hz, 3H), 2.35

(s, 3H), 4.03 (q,  $J = 6.8$  Hz, 2H), 4.25 (q,  $J = 7.2$  Hz, 2H), 6.38-6.40 (m, 2H), 7.35 (m, 1H);  $^{13}\text{C}$  NMR (100 MHz,  $\text{CDCl}_3$ )  $\delta$  14.2, 15.2, 16.0, 60.5, 64.0, 104.7, 109.3, 110.5, 140.4, 148.6, 163.6, 168.1; HRMS (ESI) calcd. for  $\text{C}_{12}\text{H}_{16}\text{O}_4\text{Na}$   $[\text{M}+\text{Na}]$ : 247.0941, found: 247.0938.

**(Z)-ethyl 2-(furan-2-yl)-3-methoxybut-2-enoate (5m')**:  $^1\text{H}$  NMR (400 MHz,  $\text{CDCl}_3$ )

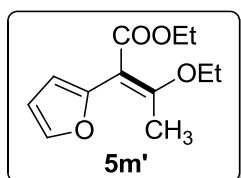

$\delta$  1.29 (t,  $J = 6.8$  Hz, 3H), 1.36 (t,  $J = 7.2$  Hz, 3H), 2.07 (s, 3H), 4.07 (q,  $J = 7.2$  Hz, 2H), 4.25 (q,  $J = 7.2$  Hz, 2H), 6.17-6.18 (m, 1H), 6.37-6.39 (m, 1H), 7.38-7.39 (m, 1H);  $^{13}\text{C}$  NMR (100 MHz,  $\text{CDCl}_3$ )  $\delta$  14.2, 15.2, 15.8, 60.8, 64.1, 109.0, 124.3, 125.2, 125.7,

136.5, 158.2, 168.8; HRMS (ESI) calcd. for  $\text{C}_{12}\text{H}_{16}\text{O}_4\text{Na}$   $[\text{M}+\text{Na}]$ : 247.0941, found: 247.0934.

**(Z)-ethyl 3-methoxy-2-(thiophen-2-yl)but-2-enoate (5n)**: The title compound was

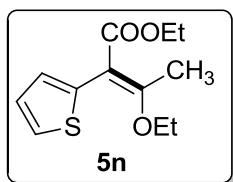

prepared according to the general procedure and purified by flash column chromatography on silica gel to give the colorless oil, (**5n**+**5n'**) 87.6 mg, 73% yield,  $E/Z = 2:1$ .  $^1\text{H}$  NMR (400 MHz,  $\text{CDCl}_3$ )  $\delta$  1.33 (t,  $J = 7.2$  Hz, 3H), 1.39 (t,  $J = 7.2$  Hz, 3H), 2.27 (s,

3H), 4.10 (q,  $J = 6.8$  Hz, 2H), 4.31 (q,  $J = 7.2$  Hz, 2H), 6.94-6.98 (m, 2H), 7.19-7.20 (m, 1H);  $^{13}\text{C}$  NMR (100 MHz,  $\text{CDCl}_3$ )  $\delta$  14.2, 15.2, 15.8, 60.8, 64.1, 109.0, 124.3,

125.2, 125.7, 136.5, 158.2, 168.8; HRMS (ESI) calcd. for  $C_{12}H_{16}O_3SNa$   $[M+Na]$ : 263.0712, found: 263.0714.

**(E)-ethyl 3-methoxy-2-(thiophen-2-yl)but-2-enoate (5n')**:  $^1H$  NMR (400 MHz,

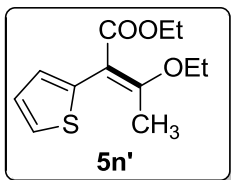

$CDCl_3$ )  $\delta$  1.28 (t,  $J = 7.2$  Hz, 3H), 1.37 (t,  $J = 6.8$  Hz, 3H), 2.01 (s, 3H), 4.07 (q,  $J = 6.8$  Hz, 2H), 4.22 (q,  $J = 6.8$  Hz, 2H), 6.84-6.85 (m, 1H), 6.96-6.99 (m, 1H), 7.26-7.28 (m, 1H);  $^{13}C$  NMR (100

MHz,  $CDCl_3$ )  $\delta$  14.2, 15.2, 16.1, 60.4, 64.6, 107.0, 125.7, 126.7, 127.7, 138.1, 161.6, 167.1; HRMS (ESI) calcd. for  $C_{12}H_{16}O_3SNa$   $[M+Na]$ : 263.0712, found: 263.0705.

**(E)-tert-butyl 3-methoxy-2-(p-tolyl)but-2-enoate (5o)**: The title compound was

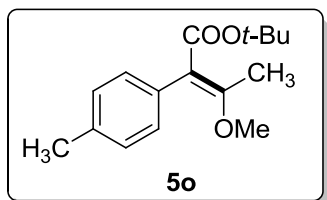

prepared according to the general procedure and purified by flash column chromatography on silica gel to give the colorless oil, (**5o**+**5o'**) 85.1 mg, 65% yield,  $E/Z = 4:1$ .  $^1H$  NMR (400 MHz,  $CDCl_3$ )  $\delta$  1.41 (s, 9H), 2.33 (s, 3H), 2.39

(s, 3H), 3.58 (s, 3H), 7.09 (s, 4H);  $^{13}C$  NMR (100 MHz,  $CDCl_3$ )  $\delta$  15.4, 21.2, 28.2, 55.3, 80.0, 114.7, 128.3, 129.9, 133.5, 135.6, 162.4, 168.8; HRMS (ESI) calcd. for  $C_{16}H_{22}O_3Na$   $[M+Na]$ : 285.1461, found: 285.1451.

**(Z)-tert-butyl 3-methoxy-2-(p-tolyl)but-2-enoate (5o')**:  $^1H$  NMR (400 MHz,  $CDCl_3$ )

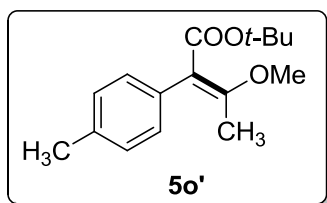

$\delta^1H$  NMR (400 MHz,  $CDCl_3$ )  $\delta$  1.36 (s, 9H), 1.80 (s, 3H), 2.26 (s, 3H), 3.68 (s, 3H), 7.01-7.06 (m, 4H);  $^{13}C$  NMR (100 MHz,  $CDCl_3$ )  $\delta$  15.3, 21.2, 28.2, 56.1, 80.1, 115.9, 128.8, 129.8, 134.0, 136.3, 158.3, 167.3; HRMS (ESI)

calcd. for  $C_{16}H_{22}O_3Na$   $[M+Na]$ : 285.1461, found: 285.1449.

**Ethyl 2-methoxycyclohept-1-enecarboxylate (5p)**: The title compound was prepared

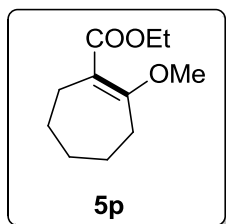

according to the general procedure and purified by flash column chromatography on silica gel to give the colorless oil, 46.1 mg, 47% yield.  $^1H$  NMR (400 MHz,  $CDCl_3$ )  $\delta$  1.31 (t,  $J = 7.2$  Hz, 3H), 1.53-1.62 (m, 4H), 1.72-1.78 (m, 2H), 2.37-2.40 (m, 2H), 2.42-2.45 (m, 2H), 3.63 (s, 3H), 4.21 (q,  $J = 7.2$  Hz, 2H);  $^{13}C$

NMR (100 MHz,  $CDCl_3$ )  $\delta$  14.3, 24.8, 26.8, 27.7, 30.7, 31.8, 56.9, 60.0, 115.3, 167.3,

168.8; HRMS (ESI) calcd. for  $C_{11}H_{19}O_3$   $[M+H]^+$ : 199.1329, found: 199.1324.

**(E)-ethyl 3-methoxy-2-phenethylbut-2-enoate (5q):** The title compound was

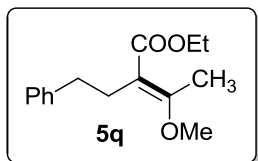

prepared according to the general procedure and purified by flash column chromatography on silica gel to give the colorless oil, 45.6 mg, 37% yield  $^1H$  NMR (400 MHz,  $CDCl_3$ )  $\delta$  1.30 (t,  $J$  = 7.2 Hz, 3H), 2.36 (s, 3H), 2.58-2.68 (m, 4H), 3.60 (s, 3H),

4.17 (q,  $J$  = 7.2 Hz, 2H), 7.14-7.21 (m, 3H), 7.25-7.29 (m, 2H);  $^{13}C$  NMR (100 MHz,  $CDCl_3$ )  $\delta$  14.4, 14.6, 28.2, 35.6, 54.7, 59.6, 110.3, 125.5, 128.1, 128.6, 142.9, 165.2, 169.4; HRMS (ESI) calcd. for  $C_{15}H_{20}NaO_3$   $[M+Na]^+$ : 271.1305, found: 271.1305.

**Ethyl 3-methoxy-2-methyl-5-phenylpent-2-enoate (5q'' + 5q'''):** The title compound

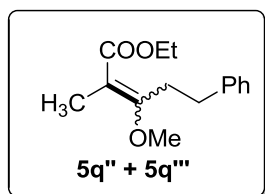

was prepared according to the general procedure and purified by flash column chromatography on silica gel to give the colorless oil, 24.0 mg, 19% yield, *isomer ratio* = 4:1.  $^1H$  NMR (400 MHz,  $CDCl_3$ )  $\delta$  1.30 (t,  $J$  = 7.2 Hz, 3H), 1.83 (s,

2.4H), 1.84 (s, 0.6H), 2.80-2.84 (m, 2H), 3.02-3.08 (m, 2H), 3.71 (s, 2.4H), 3.98 (q,  $J$  = 6.8 Hz, 0.4H), 4.19 (q,  $J$  = 7.2 Hz, 2H), 7.18-7.22 (m, 1H), 7.25-7.31 (m, 4H);  $^{13}C$  NMR (100 MHz,  $CDCl_3$ )  $\delta$  11.8, 12.1, 14.4, 15.5, 29.9, 30.6, 34.4, 55.1, 59.8, 63.2, 107.7, 108.4, 126.1, 126.1, 128.4, 128.4, 128.4, 141.4, 141.5, 166.4, 166.9, 169.2, 169.3; HRMS (ESI) calcd. for  $C_{15}H_{20}NaO_3$   $[M+Na]^+$ : 271.1305, found: 271.1304.

## 6. Gram-scale reaction

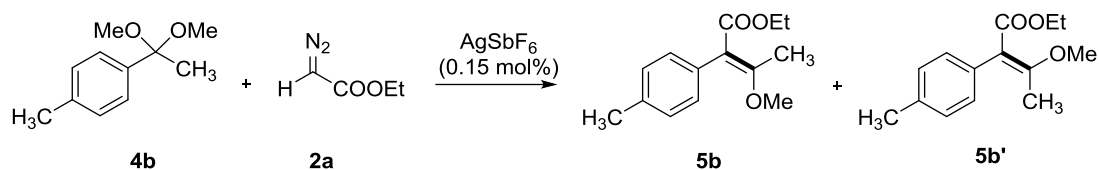

AgSbF<sub>6</sub> (5.2 mg, 0.015 mmol) was added into a 100 mL flame-dried Young-type tube in a glove box. Then ketal **4b** (1.8 g, 10 mmol), CHCl<sub>3</sub> (10 mL) and diazo acetate **2a** (2.3 g, 20 mmol) were added into the tube under argon atmosphere. The mixture was degassed by the freeze-thaw method. Then the mixture was stirred at 100 °C for 24 hours. After cooling to room temperature, the solvent was removed under reduced pressure. The reaction mixture was purified by flash column chromatography on silica gel and eluted with EtOAc/hexane (1/50 – 1/5) to afford the desired product **5b** and **5b'** (1.4 g, 60% yield, *E/Z*= 3:1).

## 7. Hydrolysis of alkenyl ether

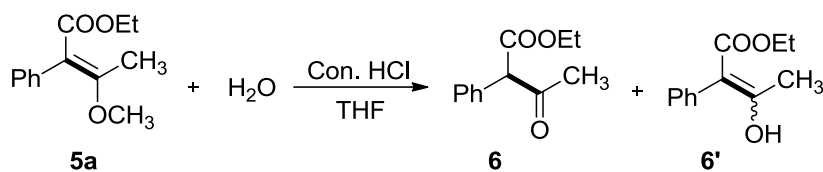

Alkenyl ether **5a** (110 mg, 0.5 mmol), H<sub>2</sub>O (9.0 μL, 0.5 mmol), THF (1.0 mL) and Con. HCl (5.0 μL) were added into a 25 mL Young-type tube. The mixture was stirred at 25 °C for 12 hours. Then the solvent was removed under reduced pressure. The reaction mixture was purified by flash column chromatography on silica gel and eluted with EtOAc/hexane (1/100 – 1/50) to afford the desired product **6** and **6'** (97.6 mg, 95% yield, **6/6'** = 1:1).

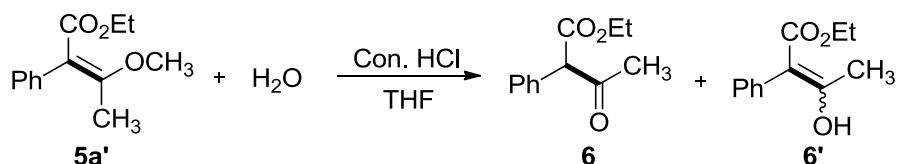

Alkenyl ether **5a'** (110 mg, 0.5 mmol), H<sub>2</sub>O (9.0 μL, 0.5 mmol), THF (1.0 mL) and Con. HCl (5.0 μL) were added into a 25 mL Young-type tube. The mixture was stirred at 25 °C for 12 hours. Then the solvent was removed under reduced pressure. The reaction mixture was purified by flash column chromatography on silica gel and eluted with EtOAc/hexane (1/100 – 1/50) to afford the desired product **6** and **6'** (84.9 mg, 82% yield, **6/6'** = 1:1).

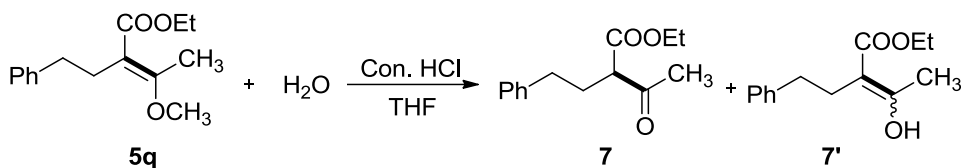

Alkenyl ether **5q** (248 mg, 1.0 mmol), H<sub>2</sub>O (18 μL, 1.0 mmol), THF (2.0 mL) and Con. HCl (10 μL) were added into a 25 mL Young-type tube. The mixture was stirred at 25 °C for 12 hours. Then the solvent was removed under reduced pressure. The reaction mixture was purified by flash column chromatography on silica gel and eluted with EtOAc/hexane (1/100 – 1/50) to afford the desired product **7** and **7'** (198 mg, 85% yield, **7/7'** = 9:1).

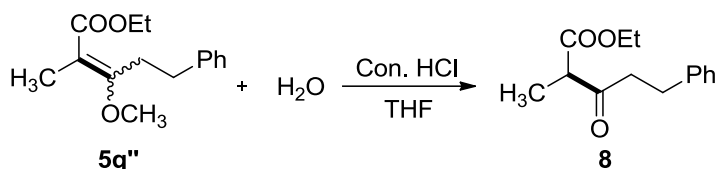

Alkenyl ether **5q''** (248 mg, 1.0 mmol), H<sub>2</sub>O (18  $\mu$ L, 1.0 mmol), THF (2.0 mL) and Con. HCl (10  $\mu$ L) were added into a 25 mL Young-type tube. The mixture was stirred at 25 °C for 12 hours. Then the solvent was removed under reduced pressure. The reaction mixture was purified by flash column chromatography on silica gel and eluted with EtOAc/hexane (1/100 – 1/50) to afford the desired product **8** (192 mg, 82% yield).

**Hydrolysis products (6+6'):** <sup>1</sup>H NMR (400 MHz, CDCl<sub>3</sub>)  $\delta$  1.19 (t, *J* = 6.8 Hz, 1.3H),

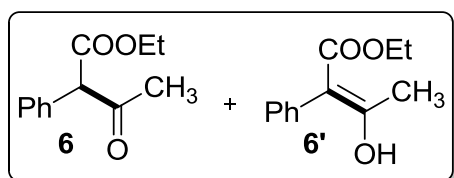

1.29 (t, *J* = 7.2 Hz, 1.8H), 1.85 (s, 1.3H), 2.18 (s, 1.7H), 4.14-4.26 (m, 2H), 4.69 (s, 0.5H), 7.14-7.40 (m, 5H), 13.14 (s, 0.4H); <sup>13</sup>C NMR (100 MHz, CDCl<sub>3</sub>)  $\delta$  14.1, 14.2, 19.9, 28.8, 60.6,

61.6, 65.8, 104.4, 126.9, 128.0, 128.3, 128.9, 129.3, 131.2, 132.7, 135.2, 168.5, 172.6, 173.9, 201.6.

**Hydrolysis products (7+7'):** <sup>1</sup>H NMR (400 MHz, CDCl<sub>3</sub>)  $\delta$  1.30 (t, *J* = 7.2 Hz, 3H),

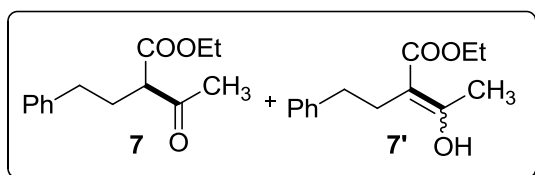

1.83 (s, 0.3H), 2.10-2.24 (m, 4.6H), 2.44-2.48 (m, 0.2H), 2.55-2.69 (m, 2H), 3.44 (t, *J* = 7.2 Hz, 0.9H), 4.22 (q, *J* = 7.2 Hz, 2H), 7.15-7.22 (m, 3H), 7.26-7.31 (m,

2H), 12.81 (s, 0.1H); <sup>13</sup>C NMR (100 MHz, CDCl<sub>3</sub>)  $\delta$  14.1, 14.3, 18.4, 28.5, 28.9, 29.6, 33.3, 36.2, 58.9, 60.3, 61.4, 125.9, 126.3, 128.3, 128.5, 128.6, 140.7, 169.7, 203.0; HRMS (ESI) calcd. for C<sub>14</sub>H<sub>18</sub>NaO<sub>3</sub> [M+Na]: 257.1148, found: 257.1151.

**Hydrolysis product (8):** <sup>1</sup>H NMR (400 MHz, CDCl<sub>3</sub>)  $\delta$  1.25 (t, *J* = 6.8 Hz, 3H), 1.31

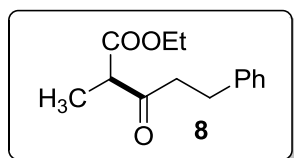

(d, *J* = 7.2 Hz, 3H), 2.76-2.96 (m, 4H), 3.51 (q, *J* = 7.2 Hz, 1H), 4.17 (q, *J* = 7.2 Hz, 2H), 7.17-7.22 (m, 3H), 7.26-7.29 (m, 2H); <sup>13</sup>C NMR (100 MHz, CDCl<sub>3</sub>)  $\delta$  12.7, 14.1, 29.6,

43.0, 53.0, 61.4, 126.2, 128.3, 128.5, 140.8, 170.4, 205.0; HRMS (ESI) calcd. for

$\text{C}_{14}\text{H}_{18}\text{NaO}_3$  [M+Na]: 257.1148, found: 257.1154.

## 8. Procedure for the Ni-catalyzed Suzuki coupling reaction<sup>5</sup>

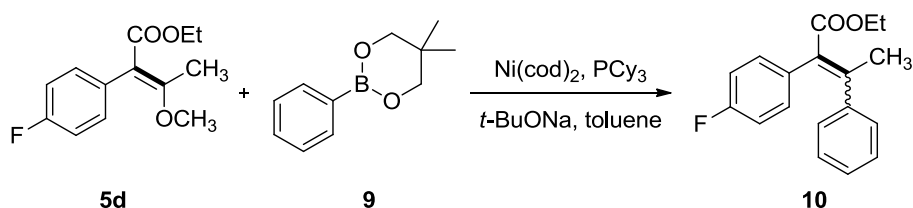

Reactions were carried out in 25 mL Young-type tube and chemicals were manipulated in a glove box filled with argon. Ni(cod)<sub>2</sub> (13.8 mg, 0.05 mmol), PCy<sub>3</sub> (56.0 mg, 0.2 mmol), *t*-BuONa (24.0 mg, 0.25 mmol), **5d** (119 mg, 0.5 mmol) and 5,5-dimethyl-2-phenyl-1,3,2-dioxaborinane (142.5 mg, 0.75 mmol) were added into toluene (2.0 mL) at room temperature. Then the mixture was proceeded at 120 °C for 12 hours. After cooling to room temperature, the crude mixture was purified by flash column chromatography on silica gel (hexane/CH<sub>2</sub>Cl<sub>2</sub> = 20/1) to give **10** as the colorless oil (120.4 mg, 85% yield, *E/Z* = 1:1).

**(*E*)-ethyl 2-(4-fluorophenyl)-3-phenylbut-2-enoate (10):** <sup>1</sup>H NMR (400 MHz, CDCl<sub>3</sub>)

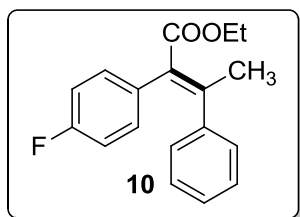

δ 1.31 (t, *J* = 7.2 Hz, 3H), 2.35 (s, 3H), 4.30 (q, *J* = 7.2 Hz, 2H), 6.77-6.81 (m, 2H), 6.96-7.02 (m, 4H), 7.11-7.18 (m, 3H); <sup>13</sup>C NMR (100 MHz, CDCl<sub>3</sub>) δ 14.2, 23.1, 61.0, 114.9 (d, *J* = 21.4 Hz), 127.1, 128.0, 128.4, 131.0, 131.6 (d, *J* = 8.0

Hz), 133.2 (d, *J* = 3.5 Hz), 141.8, 144.2, 162.8 (d, *J* = 244.8 Hz), 169.4; <sup>19</sup>F NMR (376 MHz, CDCl<sub>3</sub>) δ -115.2; HRMS (ESI) calcd. for C<sub>18</sub>H<sub>17</sub>FO<sub>2</sub>Na [M+Na]: 307.1105, found: 307.1109.

**(*Z*)-ethyl 2-(4-fluorophenyl)-3-phenylbut-2-enoate (10'):** <sup>1</sup>H NMR (400 MHz,

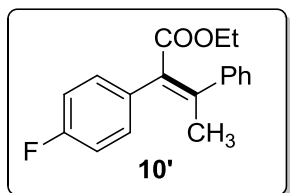

CDCl<sub>3</sub>) δ 0.87 (t, *J* = 7.2 Hz, 3H), 2.04 (s, 3H), 3.91 (q, *J* = 7.2 Hz, 2H), 7.07-7.11 (m, 2H), 7.30-7.36 (m, 7H); <sup>13</sup>C NMR (100 MHz, CDCl<sub>3</sub>) δ 13.6, 22.4, 60.6, 115.4 (d, *J* = 21.3 Hz), 127.0, 127.6, 128.2, 131.1 (d, *J* = 8.0 Hz), 131.9, 133.1 (d, *J*

= 3.4 Hz), 142.9, 144.1, 163.4 (d, *J* = 245.3 Hz), 169.3; <sup>19</sup>F NMR (376 MHz, CDCl<sub>3</sub>) δ -114.4; HRMS (ESI) calcd. for C<sub>18</sub>H<sub>17</sub>FO<sub>2</sub>Na [M+Na]: 307.1105, found: 307.1113.

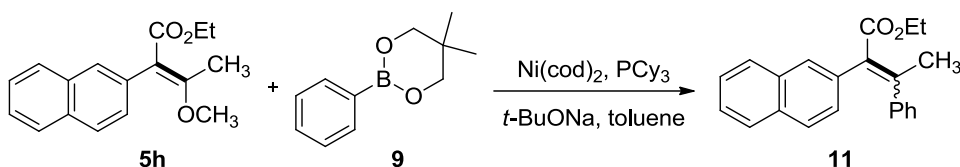

Reactions were carried out in 25 mL Young-type tube and chemicals were manipulated in a glove box filled with argon. Ni(cod)<sub>2</sub> (13.8 mg, 0.05 mmol), PCy<sub>3</sub> (56.0 mg, 0.2 mmol), *t*-BuONa (24.0 mg, 0.25 mmol), **5h** (135 mg, 0.5 mmol) and 5,5-dimethyl-2-phenyl-1,3,2-dioxaborinane (142.5 mg, 0.75 mmol) were added into toluene (2.0 mL) at room temperature. Then the mixture was proceeded at 120 °C for 12 hours. After cooling to room temperature, the crude mixture was purified by flash column chromatography on silica gel (hexane/CH<sub>2</sub>Cl<sub>2</sub> = 20/1) to give **11** as the colorless oil (129.6 mg, 82% yield, *E/Z* = 1:1).

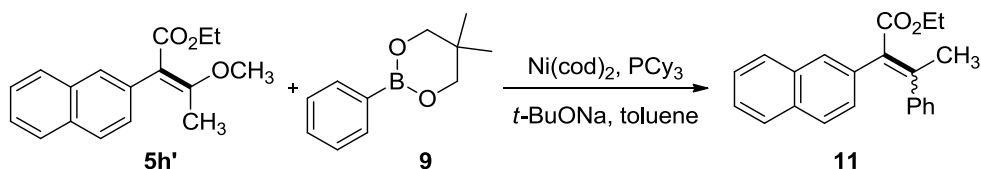

Reactions were carried out in 25 mL Young-type tube and chemicals were manipulated in a glove box filled with argon. Ni(cod)<sub>2</sub> (13.8 mg, 0.05 mmol), PCy<sub>3</sub> (56.0 mg, 0.2 mmol), *t*-BuONa (24.0 mg, 0.25 mmol), **5h'** (135 mg, 0.5 mmol) and 5,5-dimethyl-2-phenyl-1,3,2-dioxaborinane (142.5 mg, 0.75 mmol) were added into toluene (2.0 mL) at room temperature. Then the mixture was proceeded at 120 °C for 12 hours. After cooling to room temperature, the crude mixture was purified by flash column chromatography on silica gel (hexane/CH<sub>2</sub>Cl<sub>2</sub> = 20/1) to give **11** as the colorless oil (119.3 mg, 75% yield, *E/Z* = 1:1).

**Ethyl 2-(naphthalen-2-yl)-3-phenylbut-2-enoate (11+11')**: <sup>1</sup>H NMR (400 MHz,

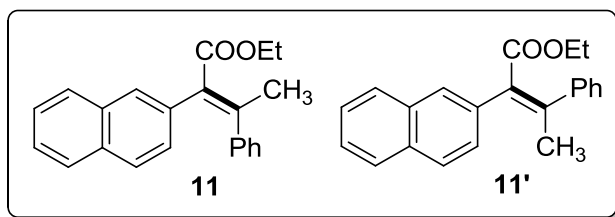

CDCl<sub>3</sub>) δ 0.81 (t, *J* = 7.2 Hz, 1.8H), 1.22 (t, *J* = 7.2 Hz, 1.3H), 2.02 (s, 1.7H), 2.31 (s, 1.3H), 3.86 (q, *J* = 6.8 Hz, 1.1H), 4.24 (q, *J* = 7.2 Hz,

0.8H), 6.98-7.04 (m, 2.5H), 7.22-7.31 (m, 3.8H), 7.38-7.47 (m, 2.6H), 7.54-7.62 (m, 1H), 7.74-7.80 (m, 2H); <sup>13</sup>C NMR (100 MHz, CDCl<sub>3</sub>) δ 13.7, 14.3, 22.5, 23.2, 60.7,

61.0, 125.9, 125.9, 126.2, 127.2, 127.2, 127.3, 127.5, 127.6, 127.7, 128.0, 128.1, 128.1, 128.1, 128.3, 128.4, 128.6, 128.7, 132.0, 132.2, 132.7, 133.0, 133.1, 133.3, 134.6, 134.7, 141.7, 143.1, 143.3, 143.9, 169.5, 169.8; HRMS (ESI) calcd. for  $C_{22}H_{20}O_2Na$  [M+Na]: 339.1356, found: 339.1369.

**(Z)-ethyl 2-(naphthalen-2-yl)-3-phenylbut-2-enoate (11')**:  $^1H$  NMR (400 MHz,

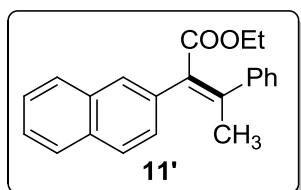

$CDCl_3$ )  $\delta$  0.81 (t,  $J = 7.2$  Hz, 3H), 2.02 (s, 3H), 3.86 (q,  $J = 7.2$  Hz, 2H), 7.21-7.31 (m, 5H), 7.40-7.43 (m, 3H), 7.72-7.80 (m, 4H);  $^{13}C$  NMR (100 MHz,  $CDCl_3$ )  $\delta$  13.7, 22.5, 60.7, 126.2, 127.1, 127.3, 127.6, 127.7, 128.0, 128.1,

128.3, 128.4, 132.7, 133.0, 133.3, 134.7, 143.1, 143.9, 169.5; HRMS (ESI) calcd. for  $C_{22}H_{20}O_2Na$  [M+Na]: 339.1356, found: 339.1363.

## 9. Procedure for the synthesis of picoxystrobin

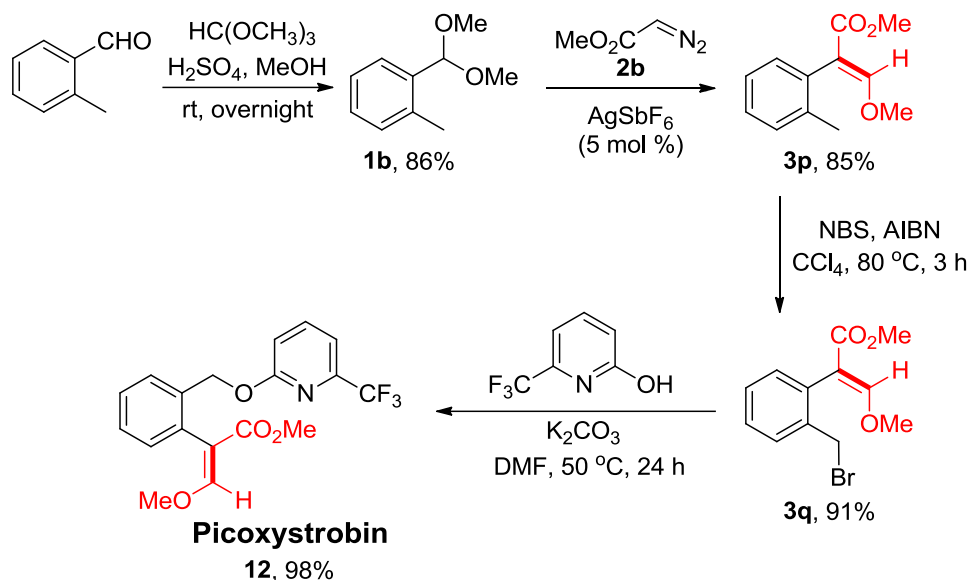

**The procedure for the synthesis of **1b**<sup>1</sup>:** The aldehyde (30 mmol) and trimethyl orthoformate (1.0 equiv) were mixed in a flask containing MeOH (15 mL). Then H<sub>2</sub>SO<sub>4</sub> (50  $\mu$ L) was added and the mixture was stirred at room temperature for 24 hours. 30% NaOH aqueous (3.0 mL) was added and the solvent was removed under reduced pressure. The reaction mixture was purified by flash column chromatography on neutral alumina and eluted with *n*-hexane to afford the desired product **1b** (4.3 g, 86% yield).

**The procedure for the synthesis of **3p**:** AgSbF<sub>6</sub> (8.5 mg, 0.025 mmol) was added into a 25 mL flame-dried Young-type tube in a glove box. Then acetal **1b** (83.0 mg, 0.5 mmol), CHCl<sub>3</sub> (1.0 mL) and methyl diazoacetate (60.0 mg, 0.6 mmol) were added into the tube under argon atmosphere. The mixture was stirred at 100 °C for 3 hours. After cooling to room temperature, the solvent was removed under reduced pressure. The reaction mixture was purified by flash column chromatography on silica gel and eluted with EtOAc/hexane (1/50 – 1/10) to afford the desired product **3p** (87.7 mg, 85% yield, *E/Z* > 20:1).

**The procedure for the synthesis of **3q**<sup>6</sup>:** To a solution of Alkenyl ether **3p** (206 mg, 1.0 mmol) in carbon tetrachloride (2.0 mL), azaisobutyronitrile (AIBN, 0.1 mmol) and *N*-bromosuccinimide (NBS, 1.2 mmol) was added under argon atmosphere. The

mixture was stirred at 80 °C for 3 hours. After cooling to room temperature, the solvent was removed under reduced pressure. The reaction mixture was purified by flash column chromatography on silica gel and eluted with EtOAc/hexane (1/50 – 1/10) to afford the desired product **3q** (258.4 mg, 91% yield).

**The procedure for the synthesis of picoxystrobin **12****<sup>7</sup>: Alkenyl ether **3q** (285 mg, 1.0 mmol), 6-(trifluoromethyl)pyridin-2-ol (212 mg, 1.3 mmol), K<sub>2</sub>CO<sub>3</sub> (259 mg, 2.0 mmol) and DMF (5.0 mL) were added into a 50 mL Young-type tube under argon atmosphere. The mixture was stirred at 50 °C for 24 hours. Then the reaction mixture was cooled to room temperature. Water (20 mL) and EtOAc (20 mL) were subsequently added to the mixture. The aqueous layer was extracted with EtOAc (20 mL × 3) after separation. The combined organic layer was concentrated after washing with brine (20 mL × 3) and dried with anhydrous Na<sub>2</sub>SO<sub>4</sub>. The crude product was purified by flash column chromatography on silica gel and eluted with EtOAc/hexane (1/20 – 1/10) to afford the desired product **12** (359.7 mg, 98% yield).

**Picoxystrobin **12****: <sup>1</sup>H NMR (400 MHz, CDCl<sub>3</sub>) δ 3.67 (s, 3H), 3.81 (s, 3H), 5.33 (s, 2H), 6.89 (d, *J* = 8.4 Hz, 1H), 7.18-7.24 (m, 2H), 7.32-7.36 (m, 2H), 7.55-7.59 (m, 2H), 7.70 (t, *J* = 7.6 Hz, 1H); <sup>13</sup>C NMR (100 MHz, CDCl<sub>3</sub>) δ 51.6, 61.9, 66.3, 110.2, 113.3 (d, *J* = 3.3 Hz), 114.7, 122.8 (d, *J* = 271.9 Hz), 127.9 (d, *J* = 4.7 Hz), 128.9, 131.1, 132.3, 135.7, 139.4, 145.9 (q, *J* = 34.4 Hz), 160.0, 163.6, 168.0; <sup>19</sup>F NMR (376 MHz, CDCl<sub>3</sub>) δ -68.4.

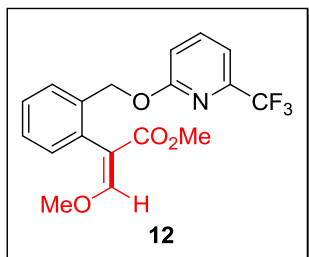

## 10. References

1. a) Ladépêche, A.; Tam, E.; Ancel, J.-E.; Ghosez, L. *Synthesis* **2004**, 9, 1375; b) Ortholand, J.-Y.; Vicart, N.; Greiner, A. *J. Org. Chem.* **1995**, 60, 1880.
2. a) Mao, H.; Lin, A.; Shi, Y.; Mao, Z.; Zhu, X.; Li, W.; Hu, H.; Cheng, Y.; Zhu, C. *Angew. Chem. Int. Ed.* **2013**, 52, 6288.
3. Bew, S. P.; Ashford, P.-A.; Bachera, D. U. *Synthesis* **2013**, 45, 903.
4. Takeshita, H.; Watanabe, J.; Kimura, Y.; Kawakami, K.; Takahashi, H.; Takemura, M.; Kitamura, A.; Someya, K.; Nakajima, R. *Bioorg. Med. Chem. Lett.* **2010**, 20, 3893.
5. Shindo, M.; Sato, Y.; Yoshikawa, T.; Koretsune, R.; Shishido, K. *J. Org. Chem.* **2004**, 69, 3912.
6. Chaudhary, P. M.; Tupe, S. G.; Jorwekar, S. U.; Sant, D. G.; Deshpande, S. R.; Maybhate, S. P.; Likhite, A. P.; Deshpande, M. V. *India J. Chem.* **2015**, 54B, 908.
7. Chen, Y.; Lu, H.; Dai, H.; Yu, W.; Pan, X. *Org. Process Res. Dev.* **2016**, 20, 195.

## 11. Copies for NMR of products

LJW-X160419-2-HNMR (3)

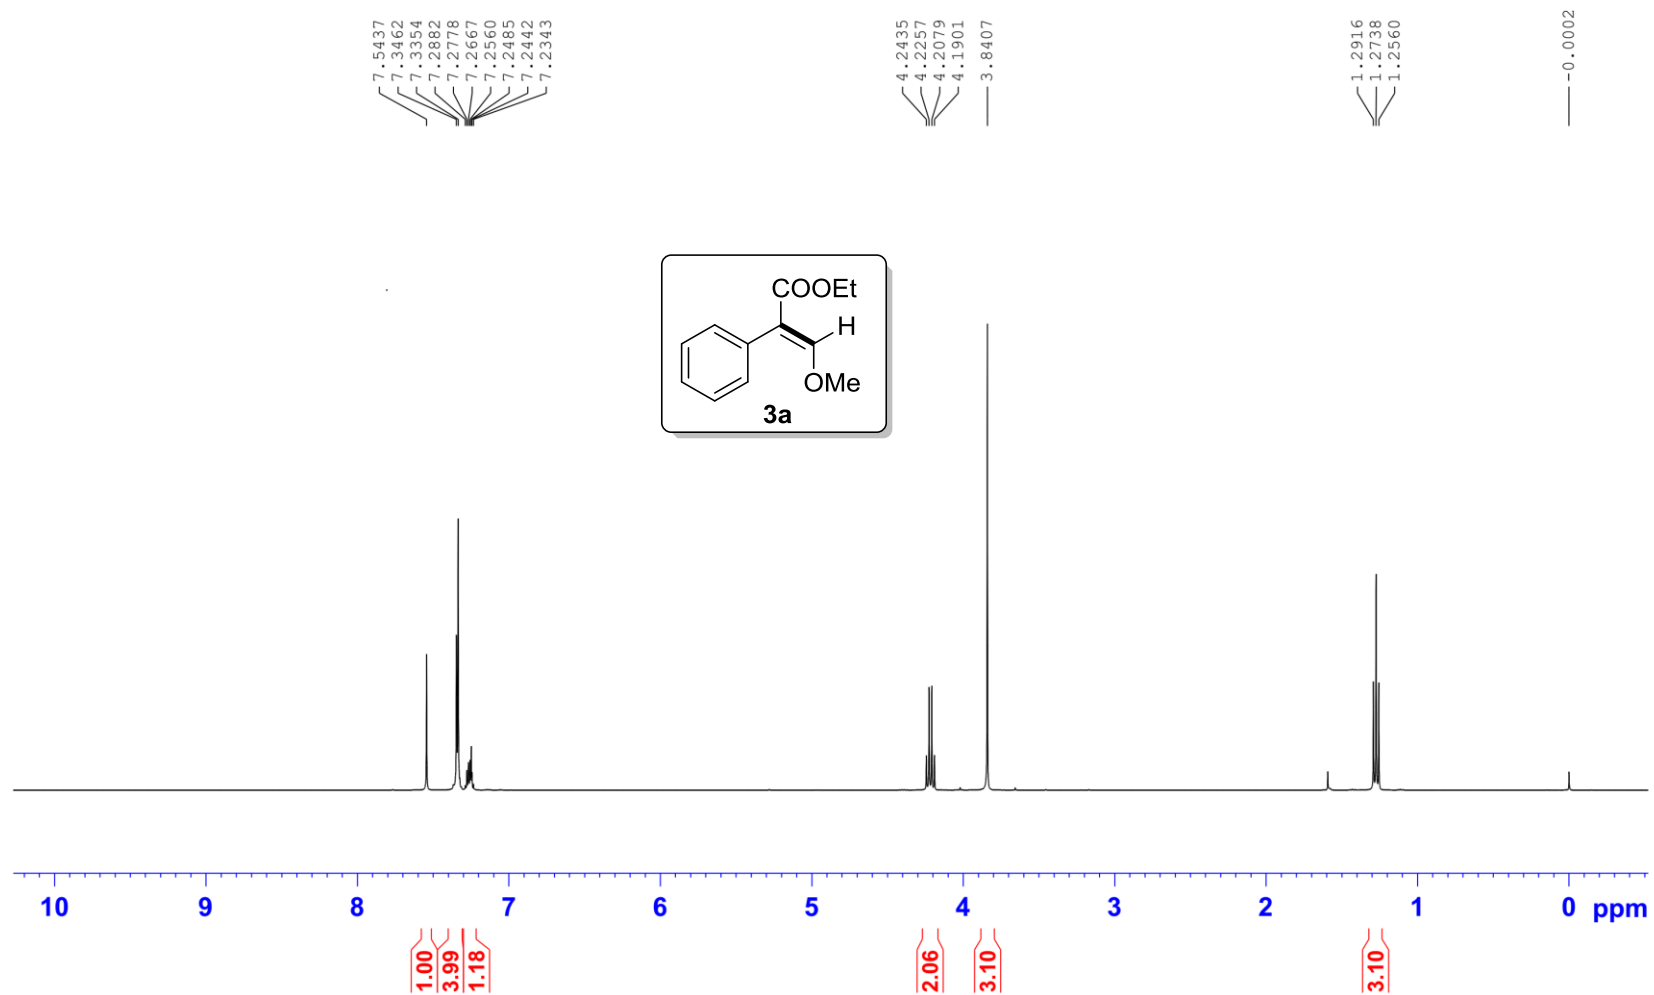

LJW-X160419-2-CNMR (4)

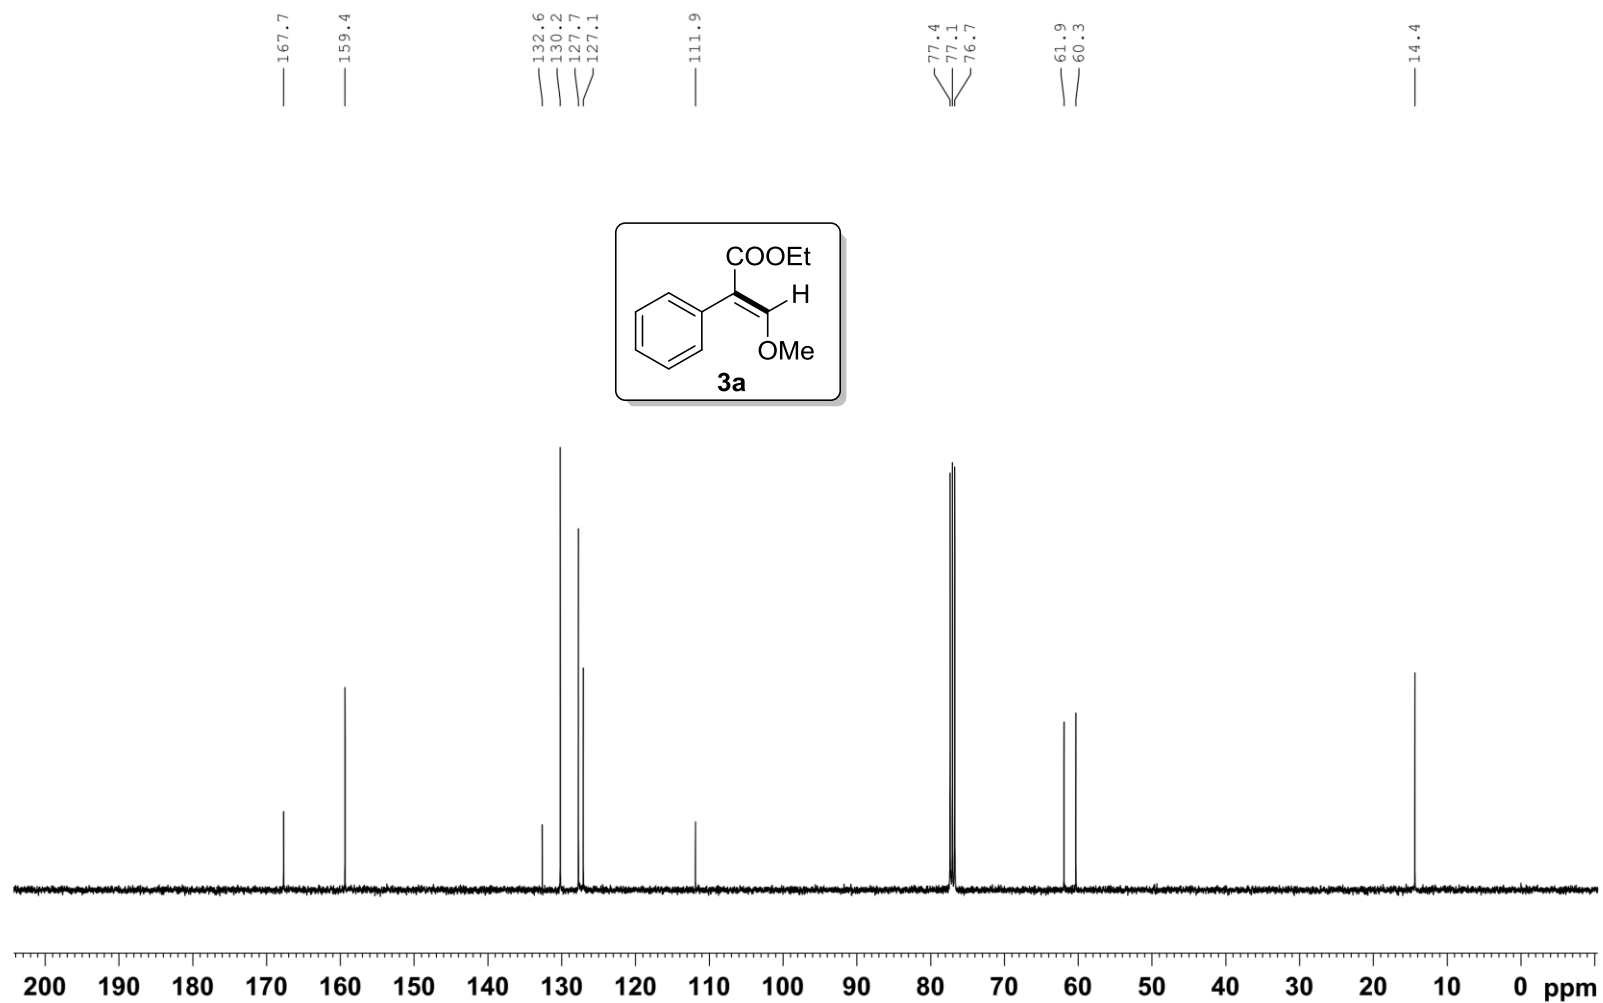

LJW-X180907-1-HNMR

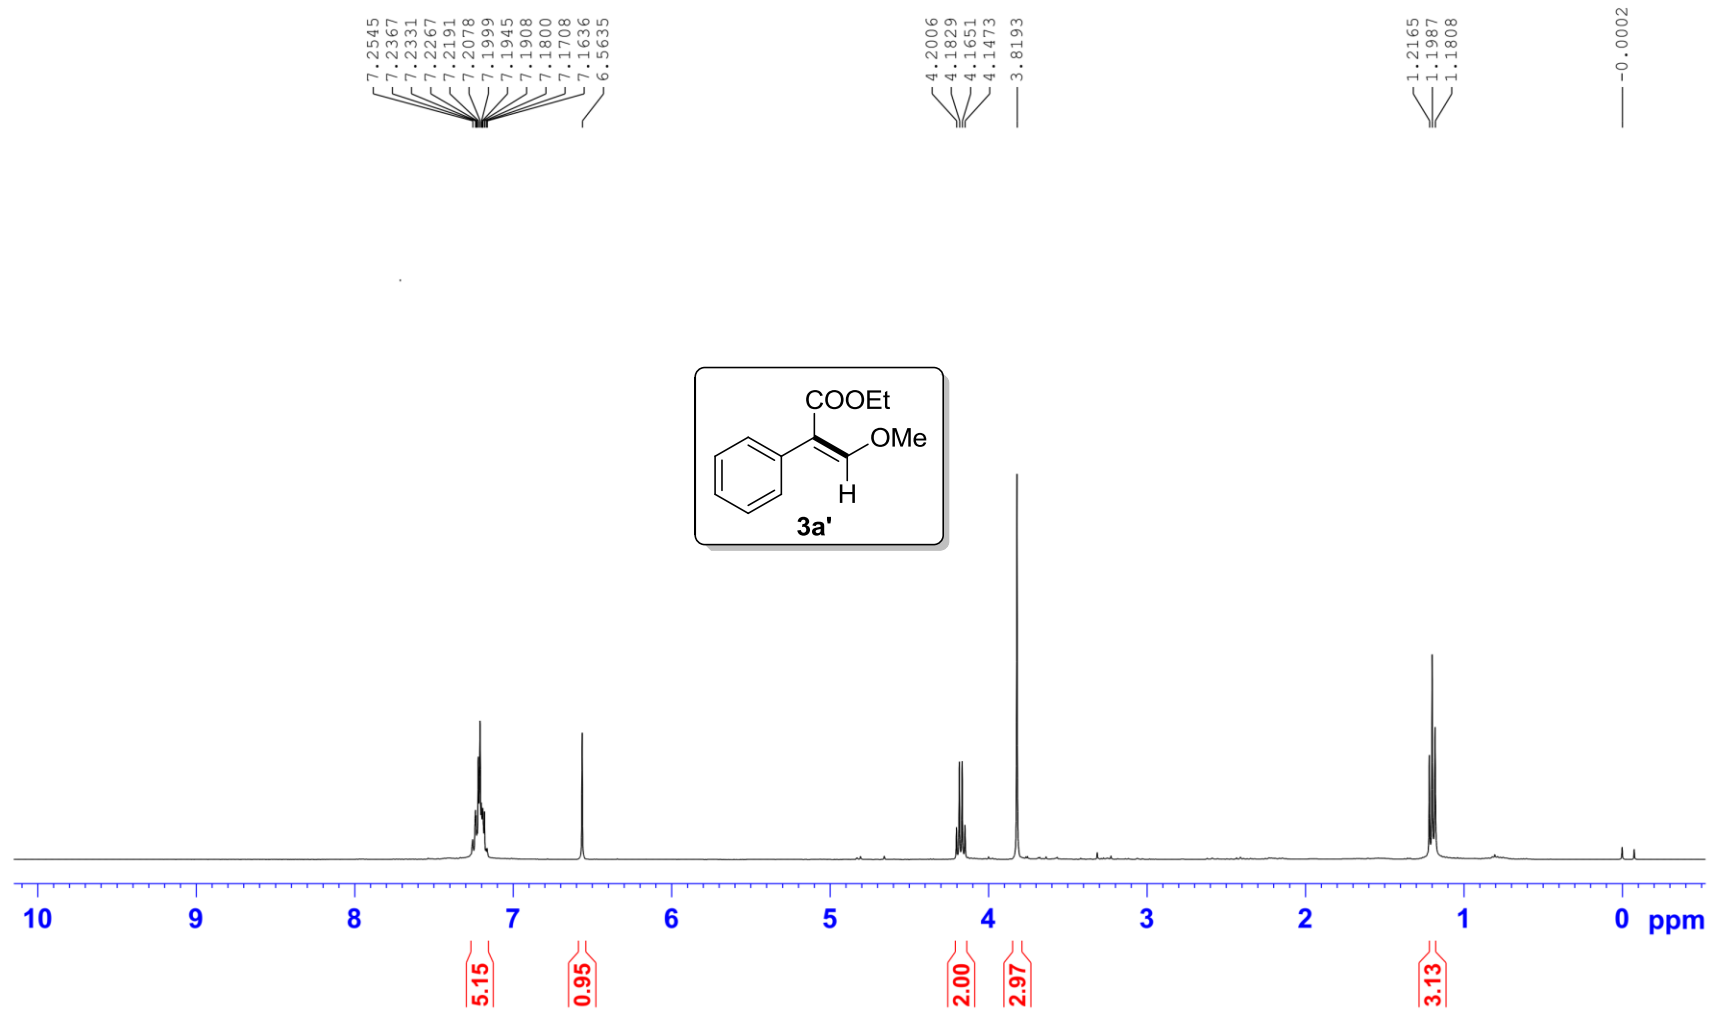

LJW-X180907-1-CNMR

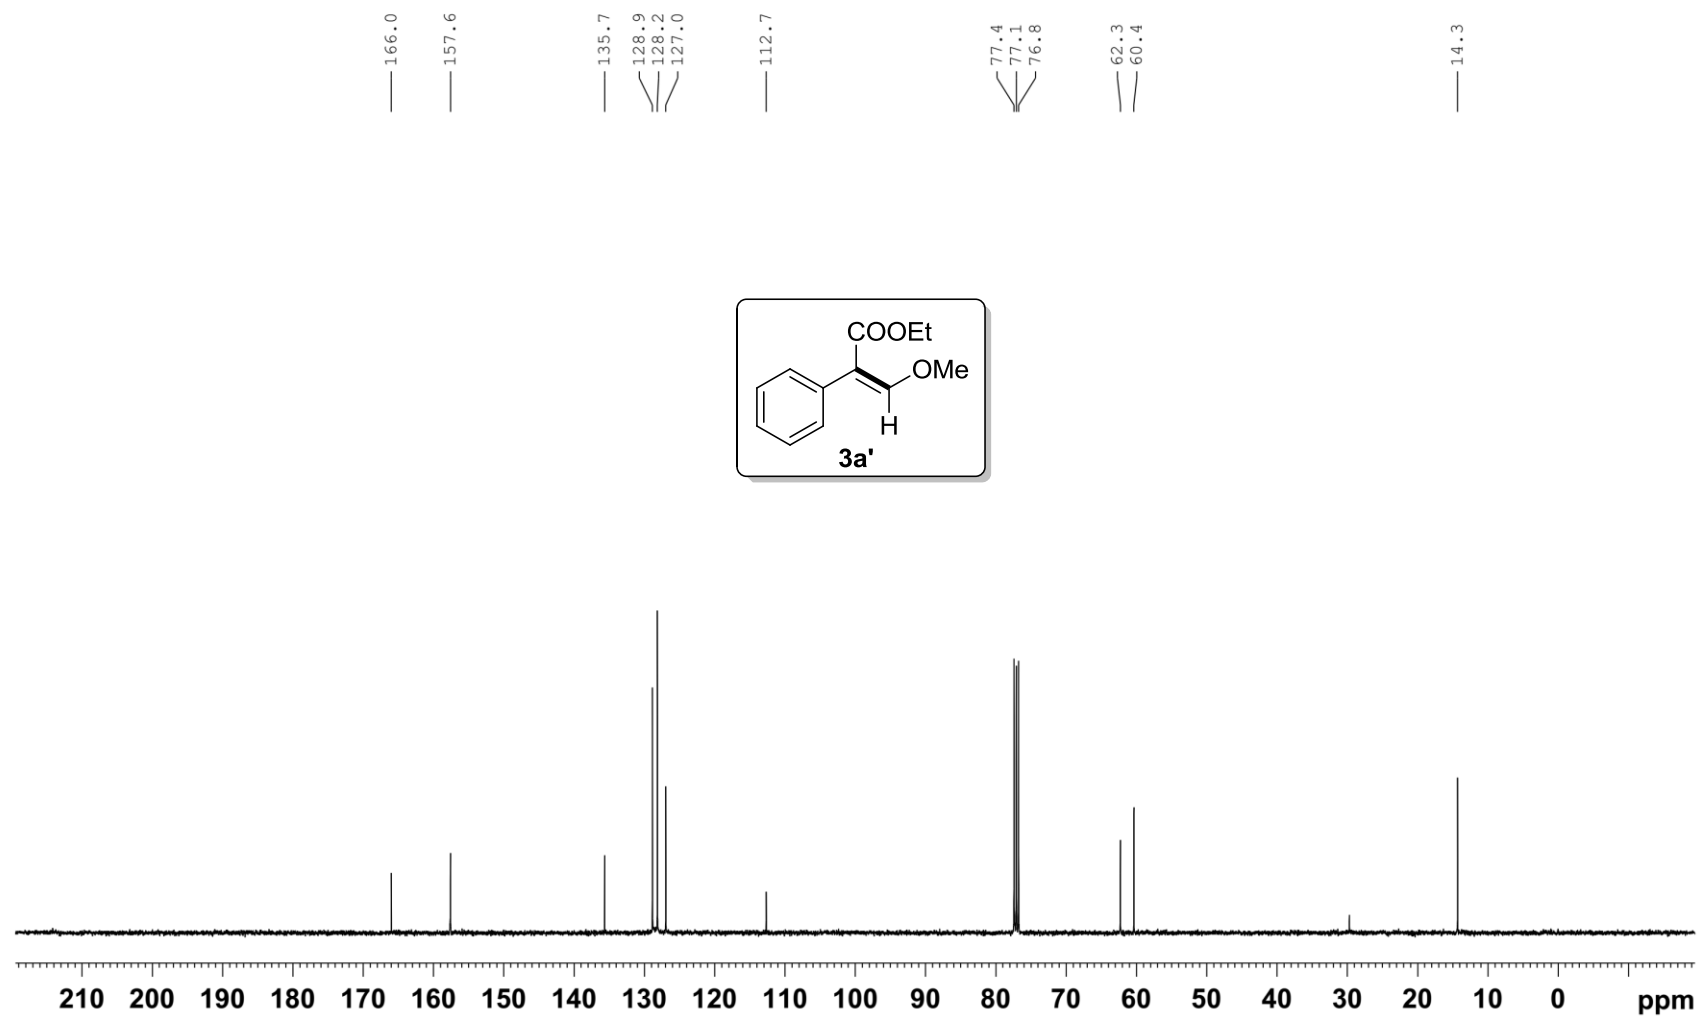

LJW-X160419-1-HNMR (1)

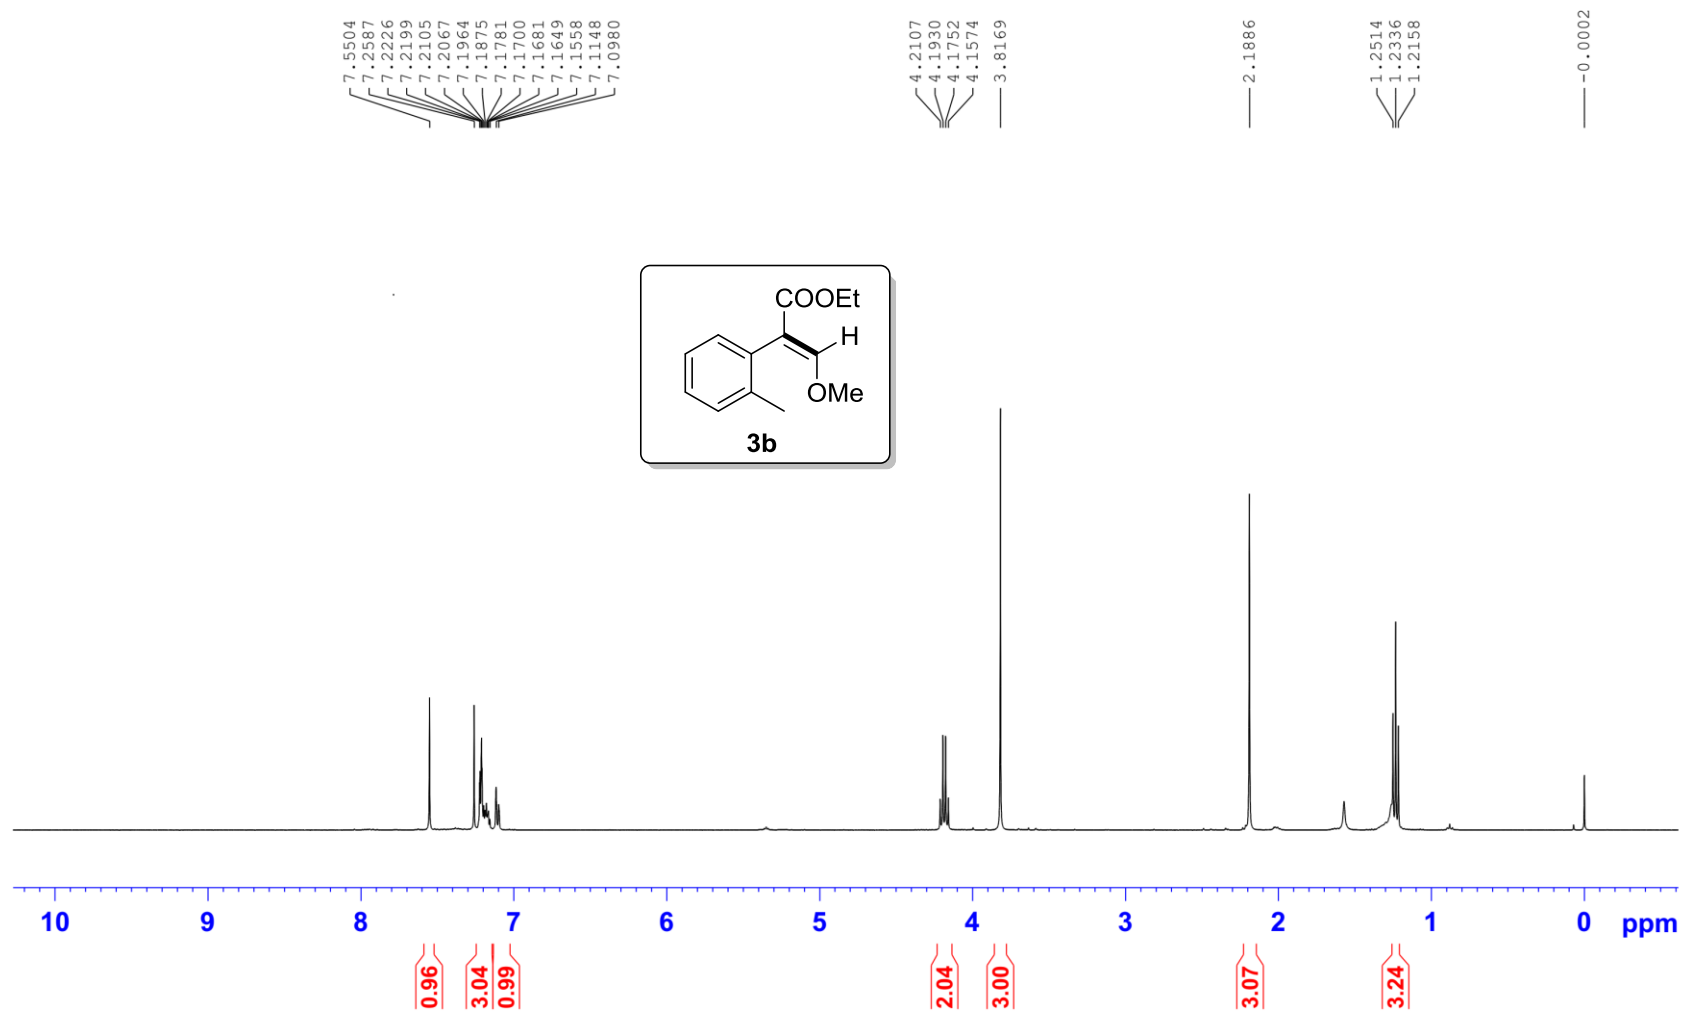

LJW-X160419-1-CNMR (2)

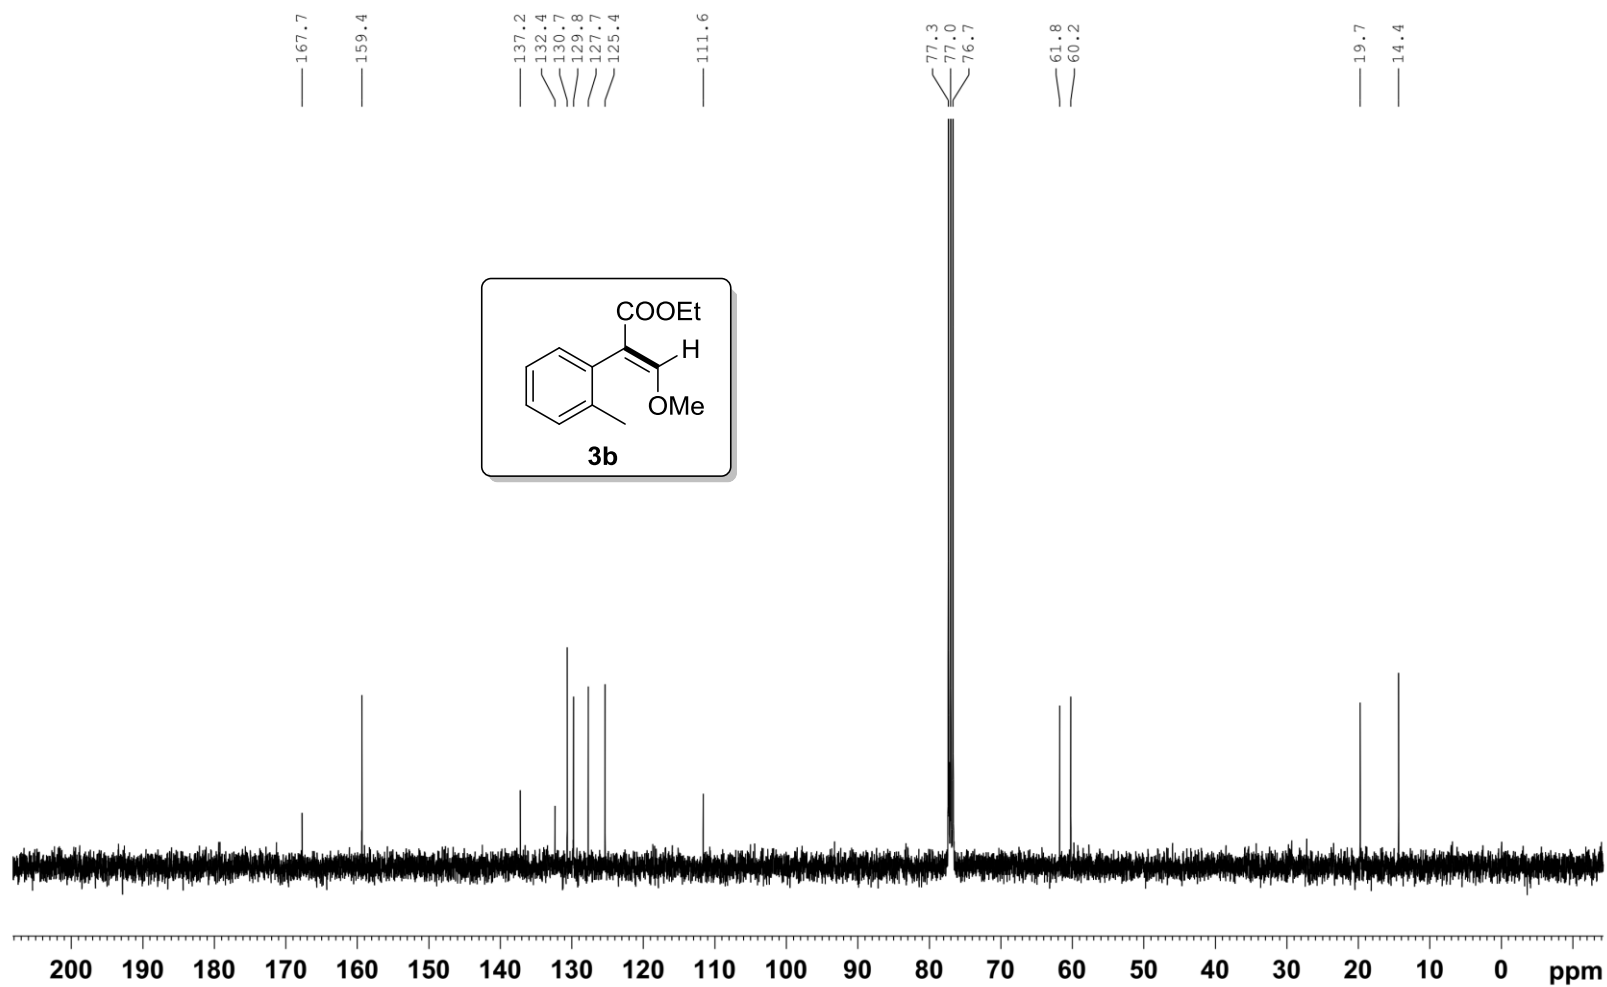

LJW-X160511-2-HNMR (2)

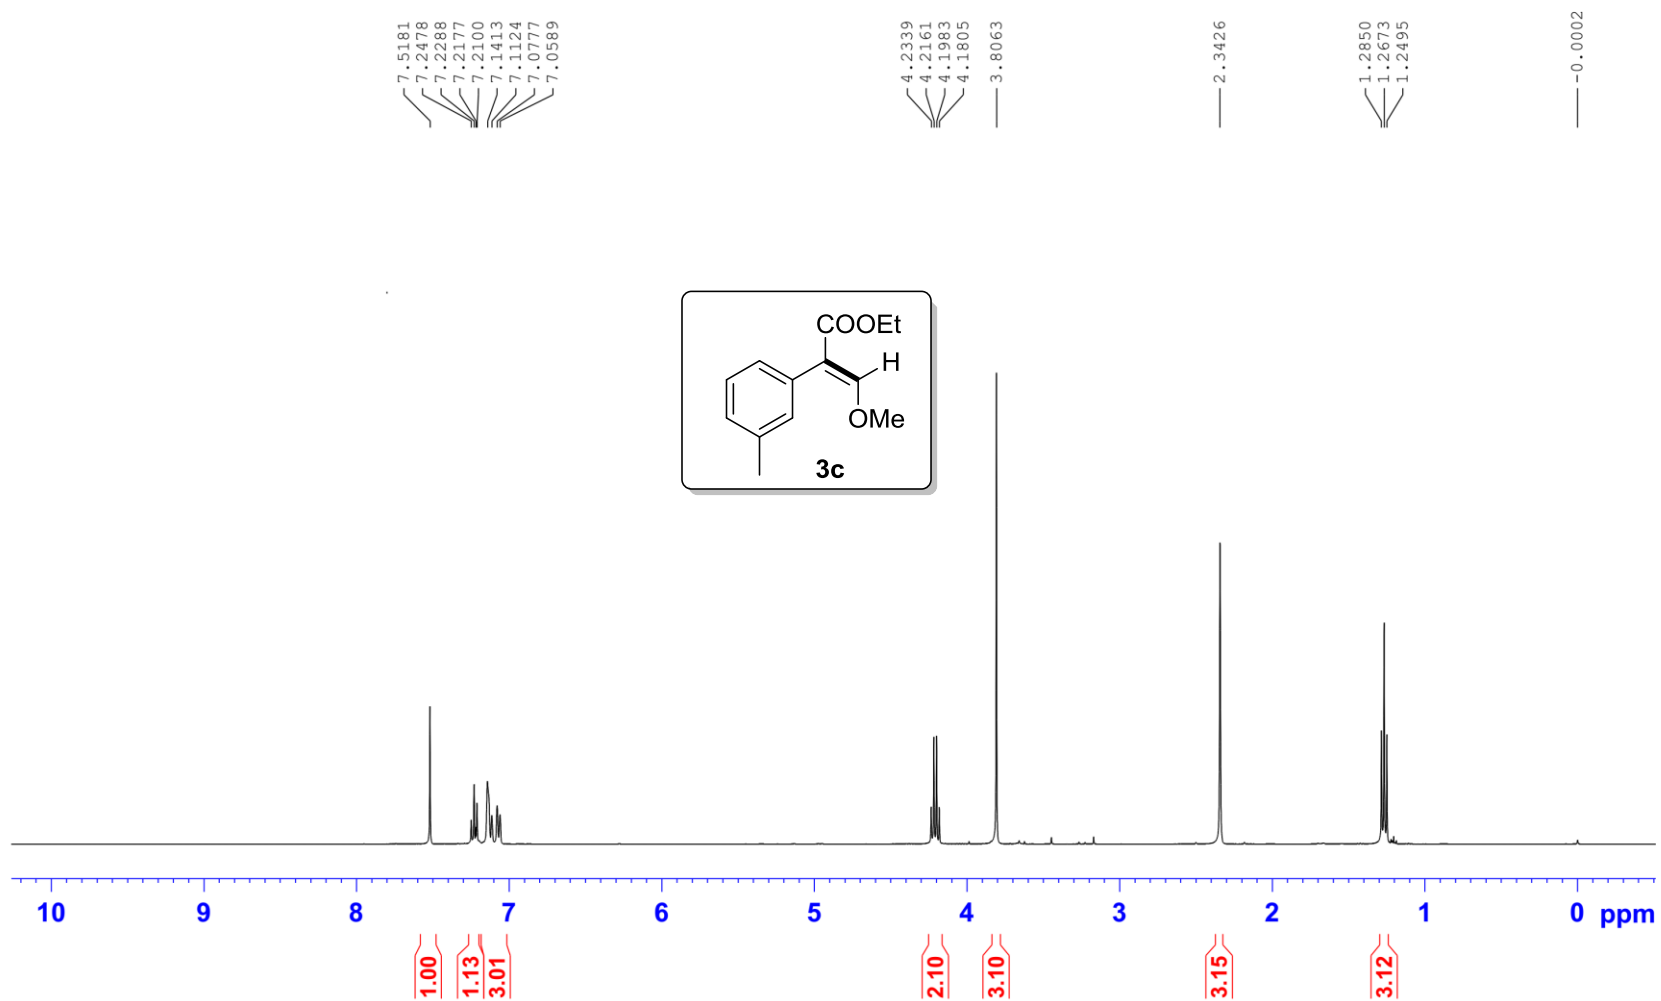

LJW-X160511-2-CNMR (3)

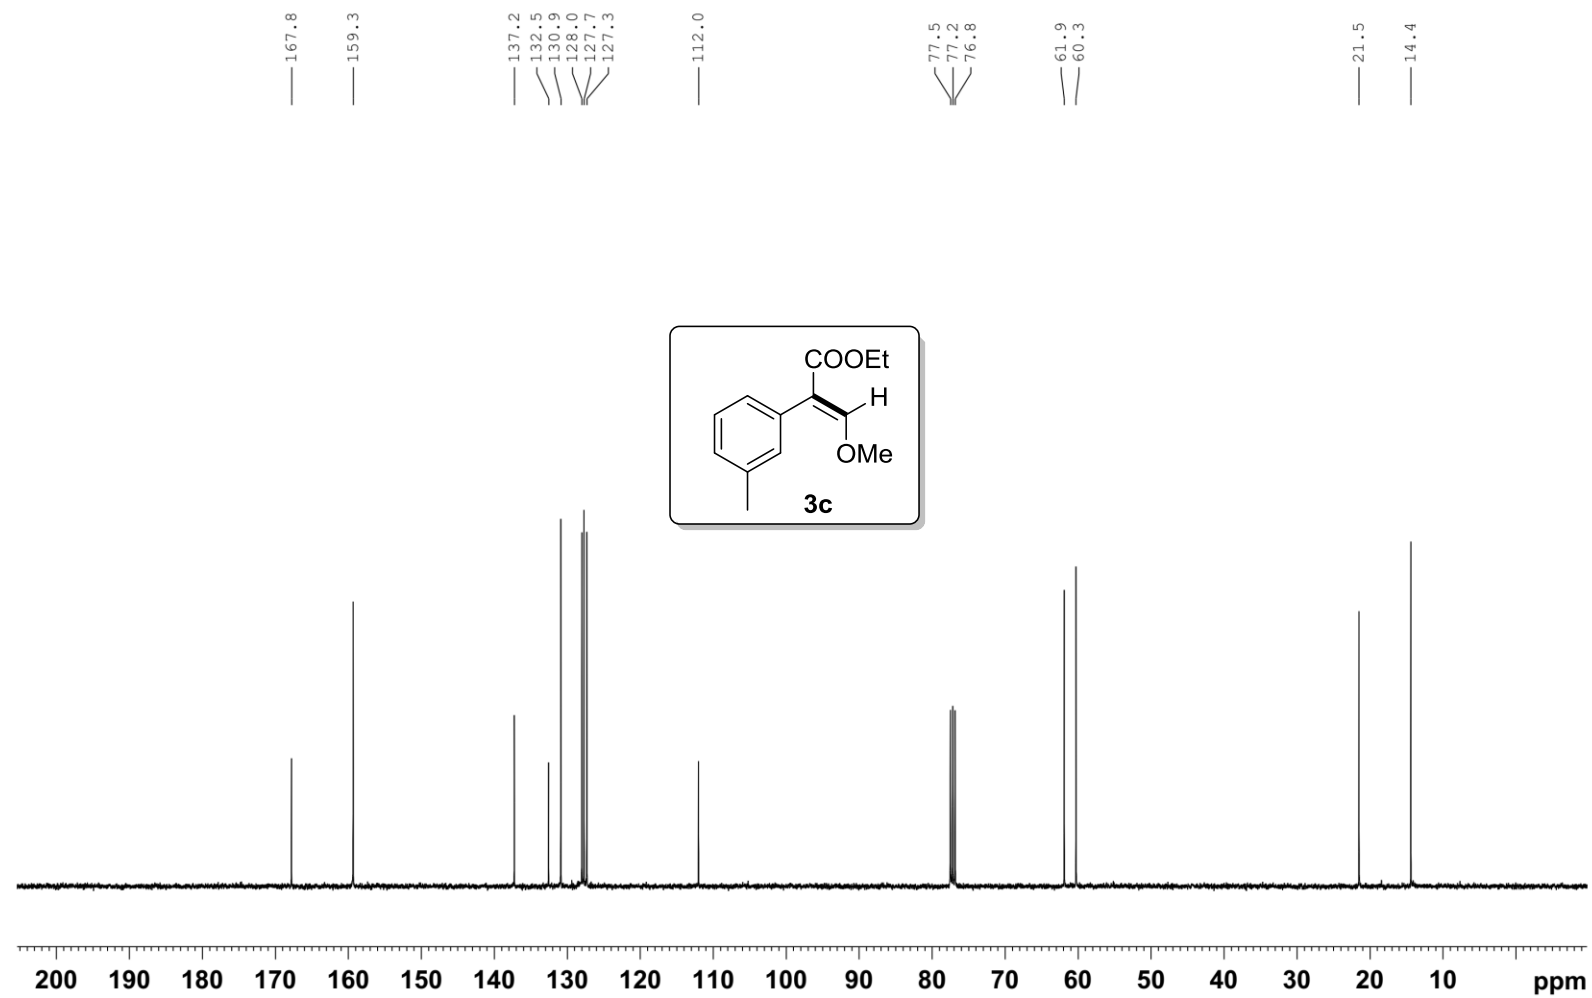

LJW-X180524-3-HNMR

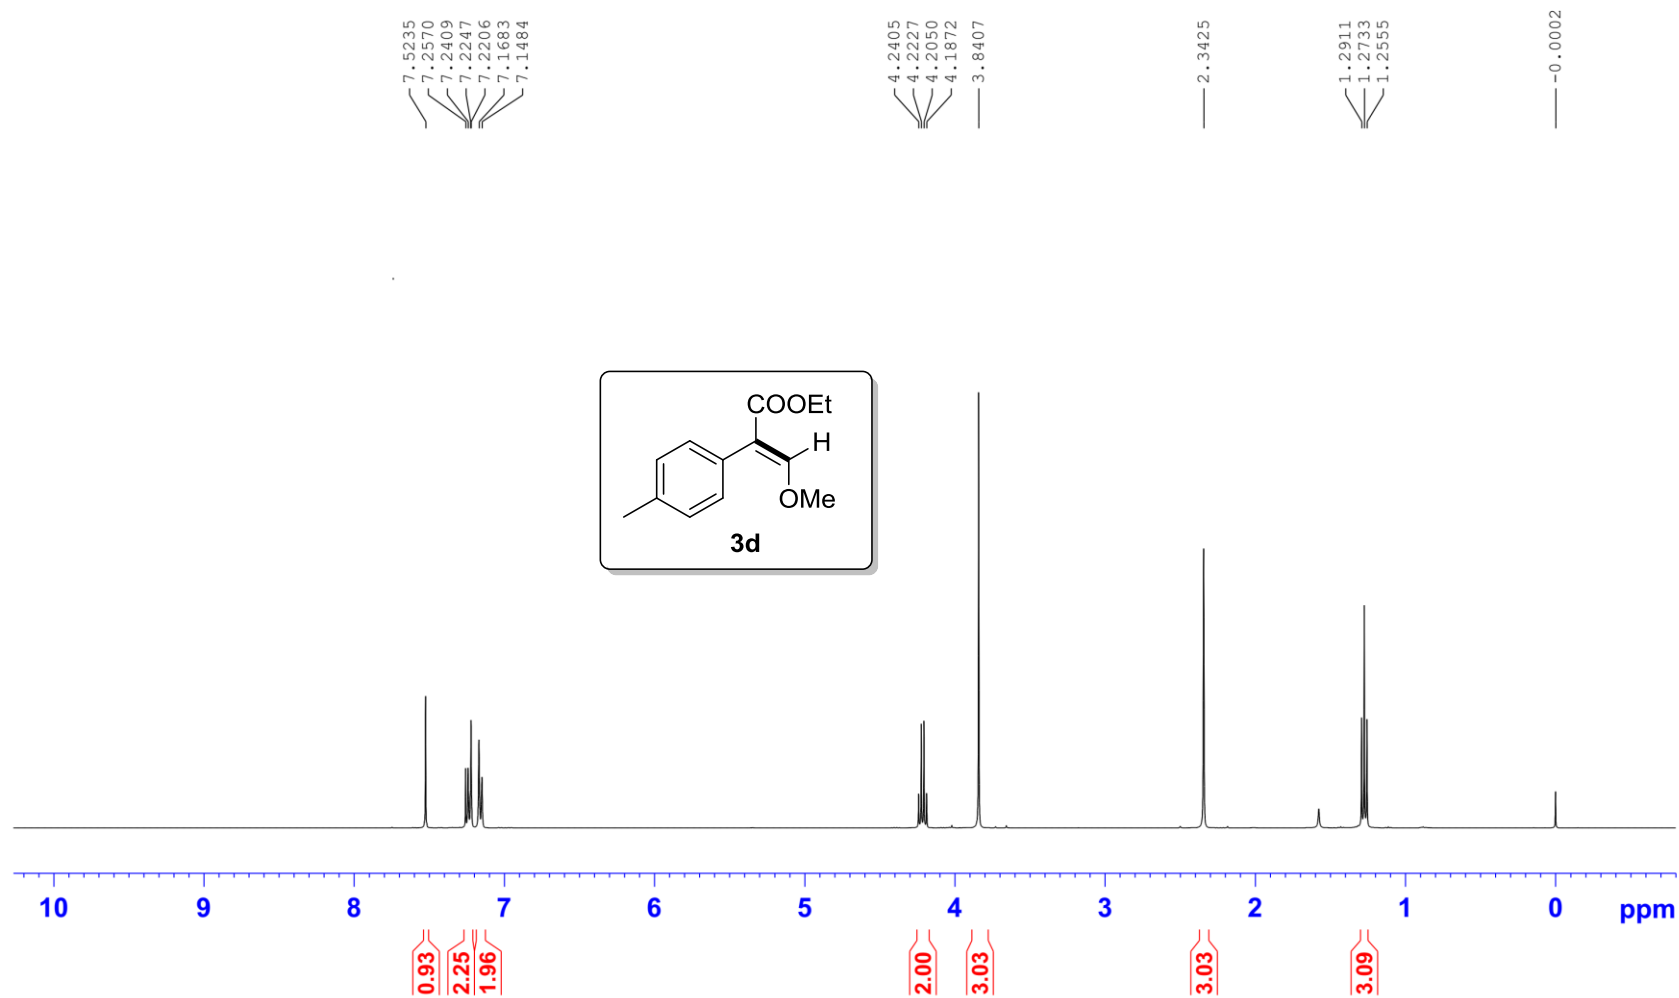

LJW-X160602-2-CNMR (22)

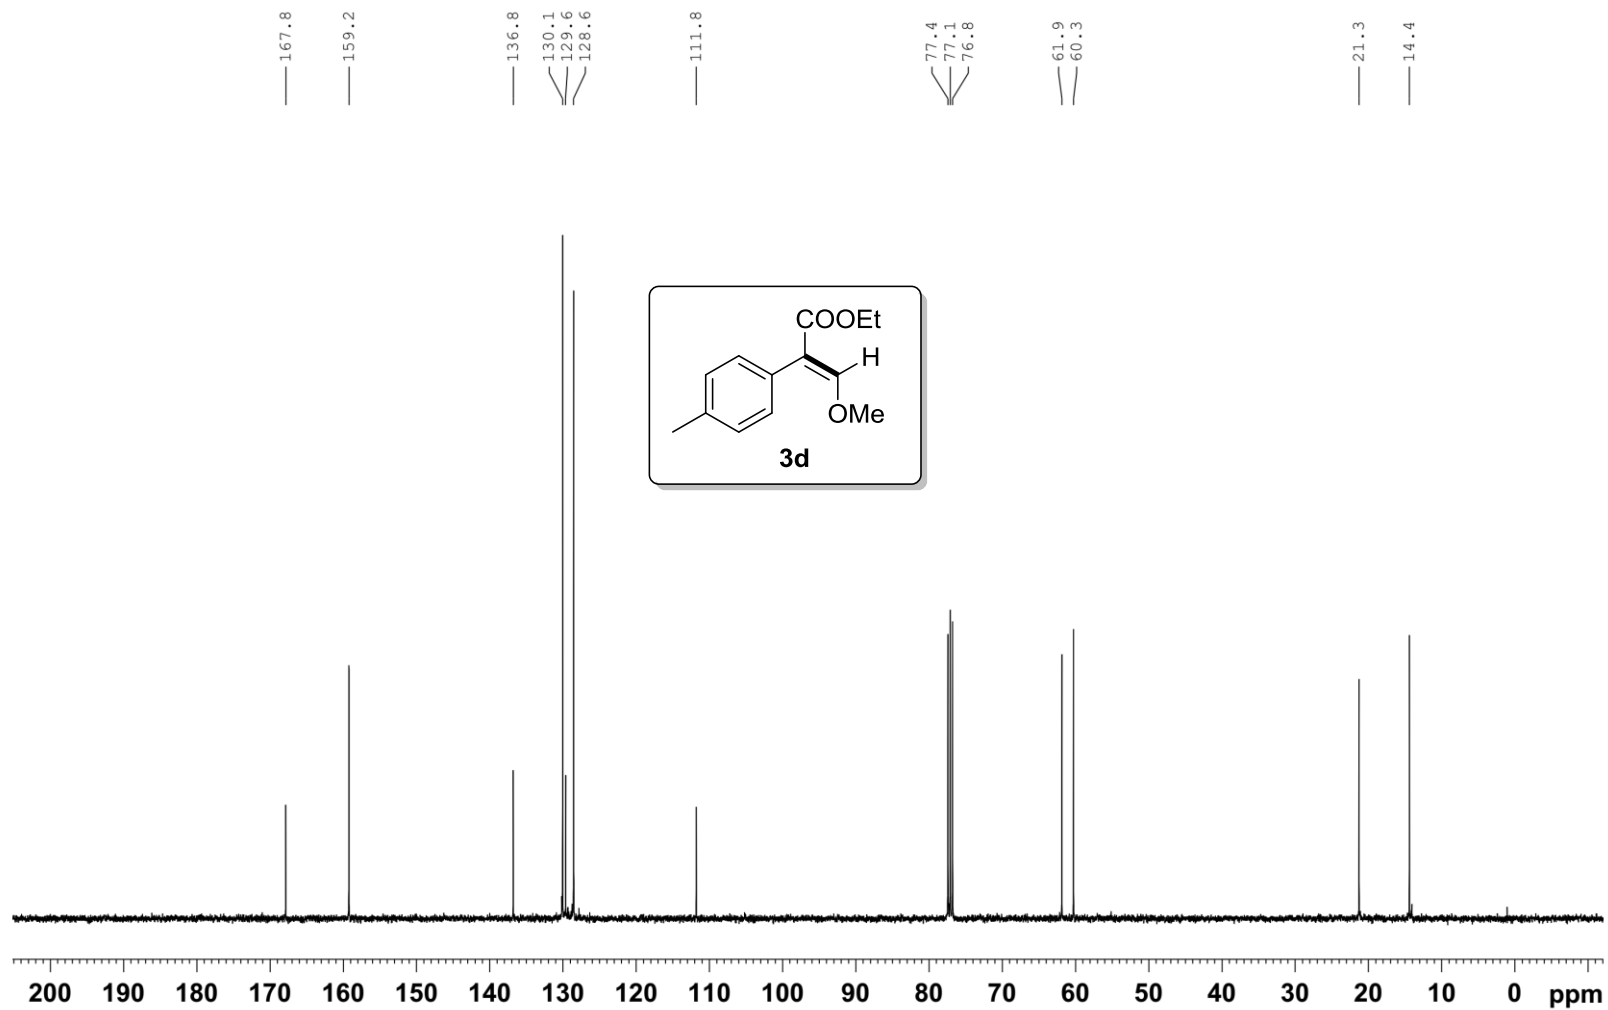

LJW-X160531-5-HNMR (35)

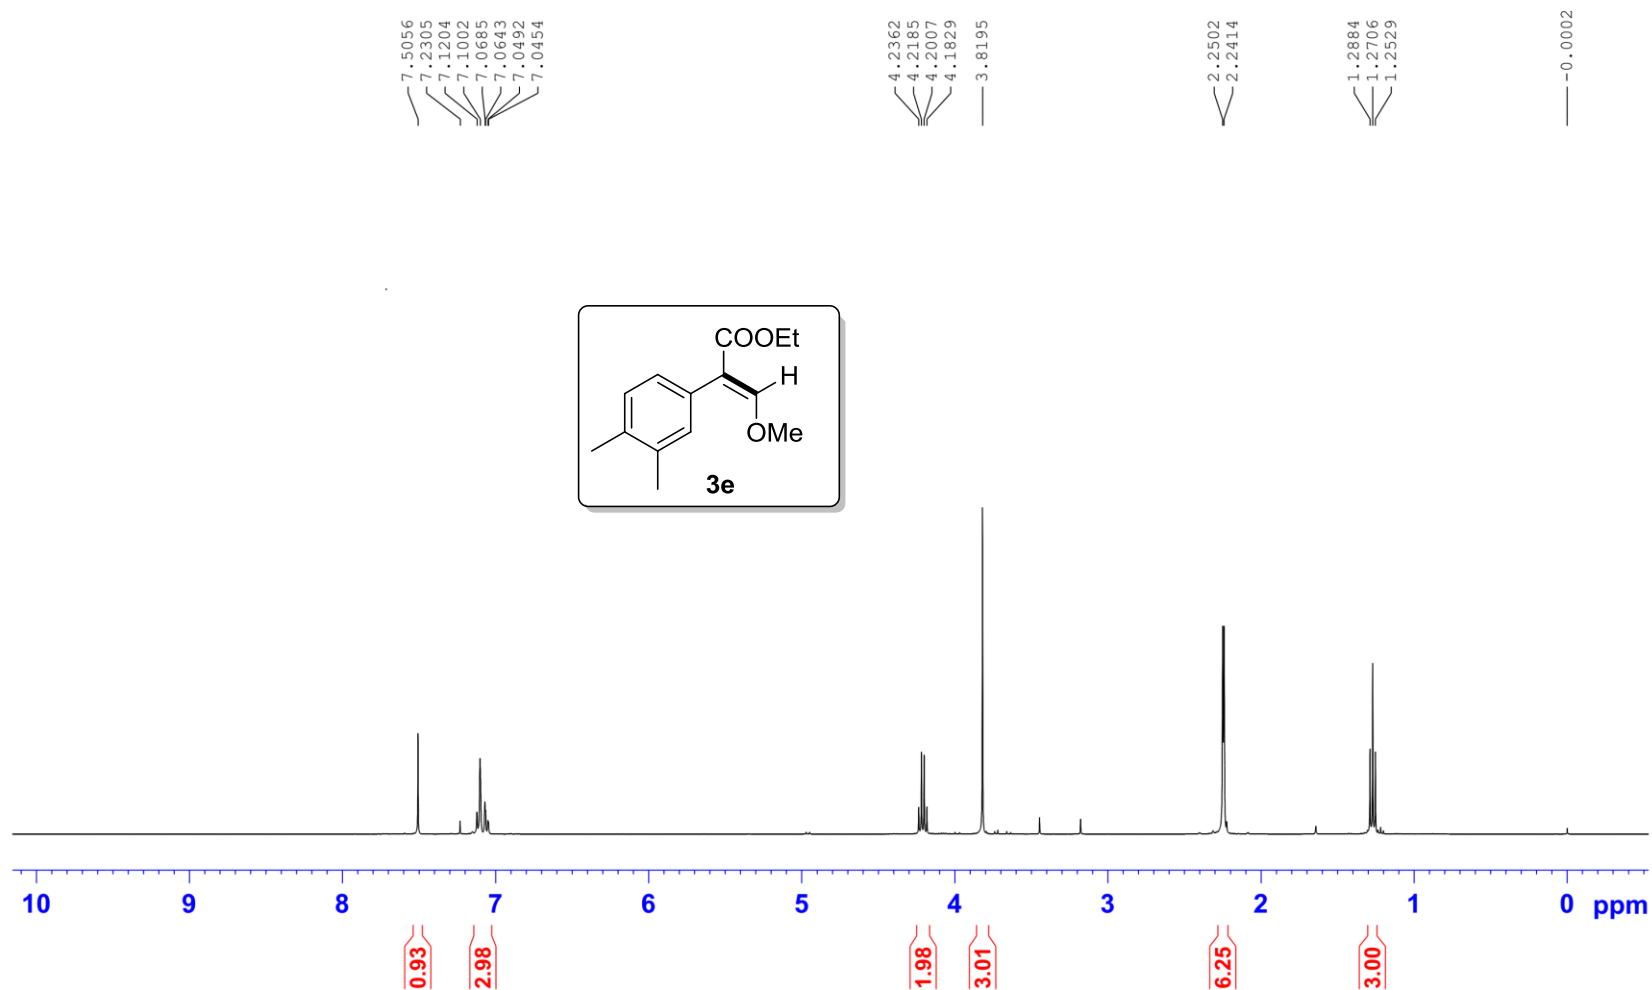

LJW-X160531-5-CNMR (36)

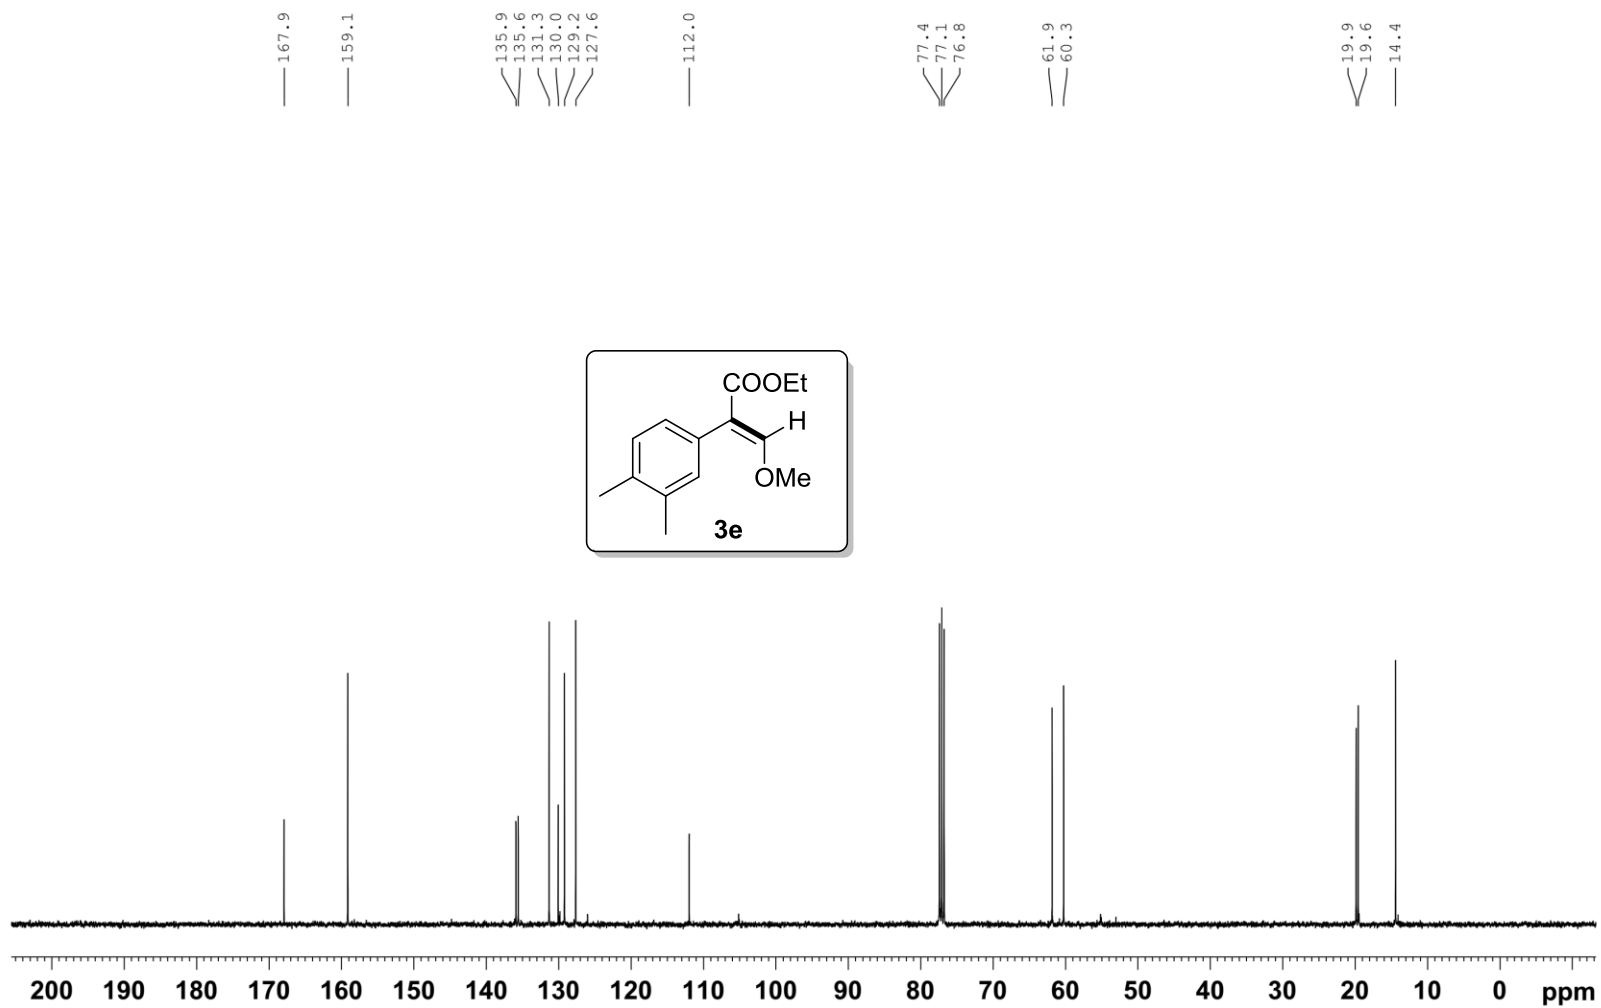

LJW-X160512-2-HNMR (2)

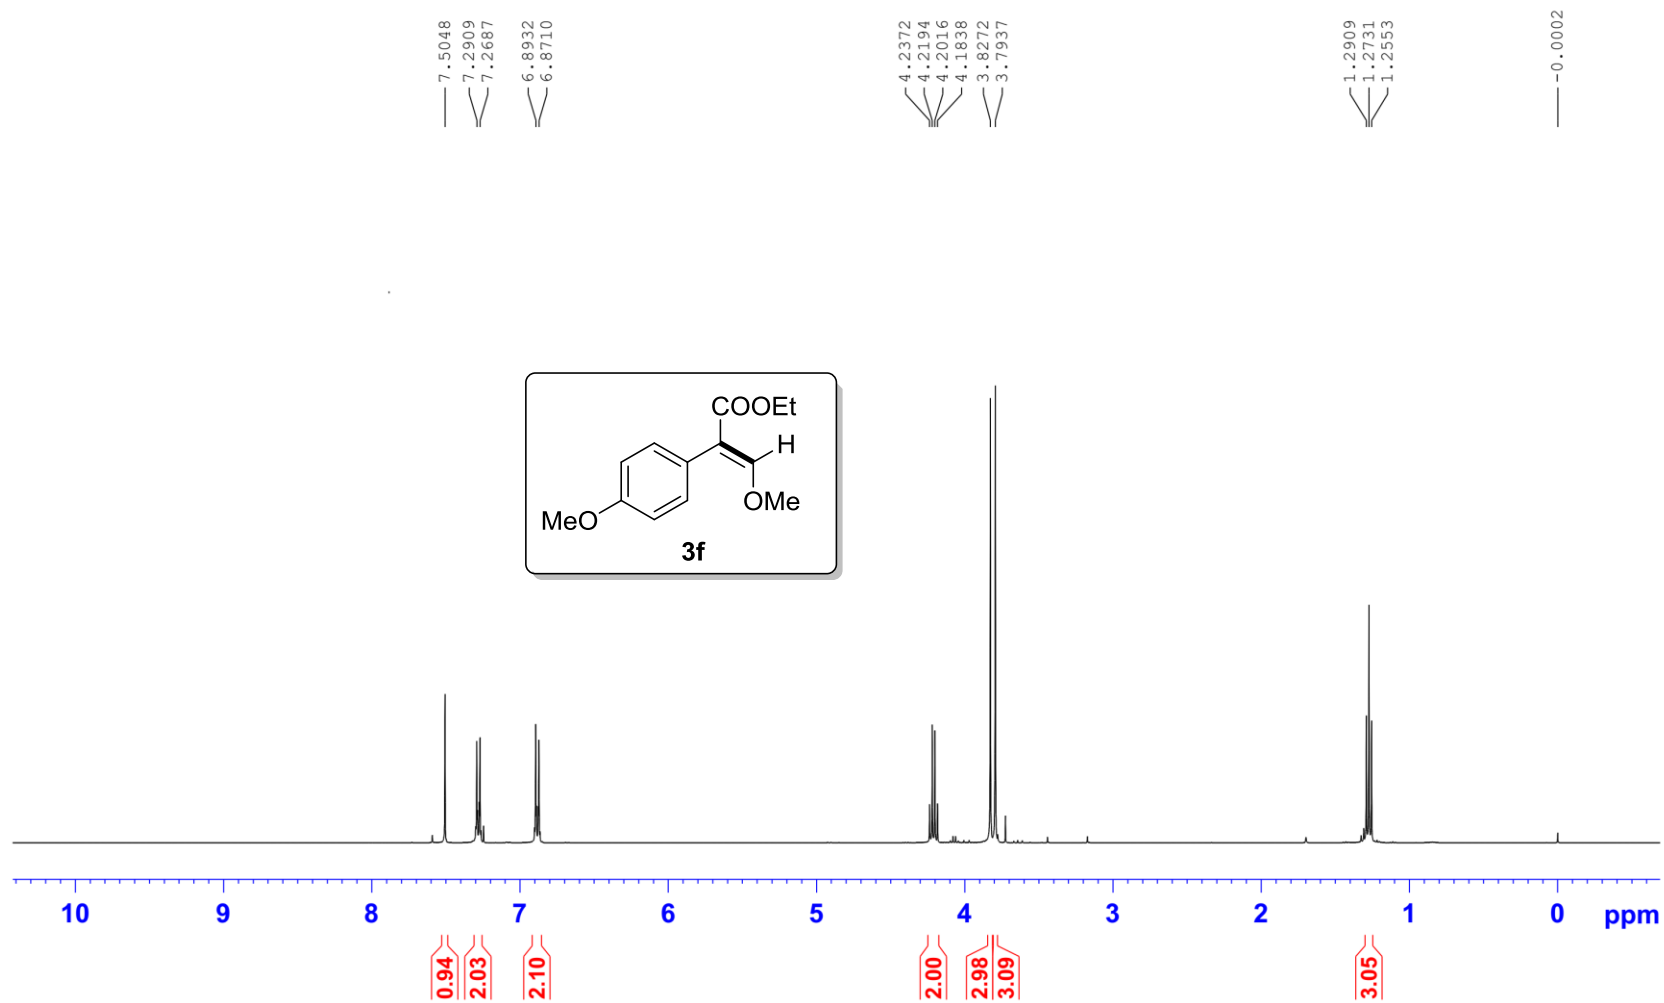

LJW-X160517-2-CNMR (19)

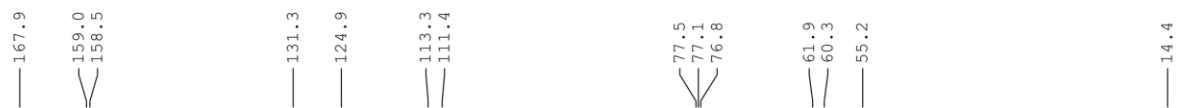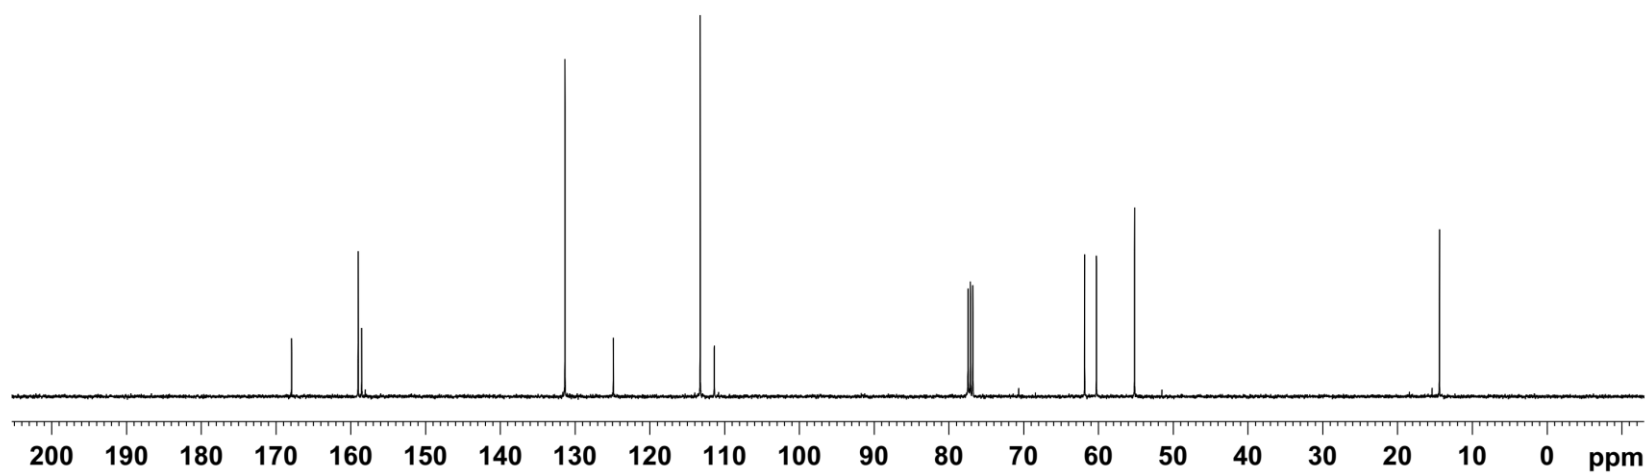

LJW-X160420-1-HNMR (2)

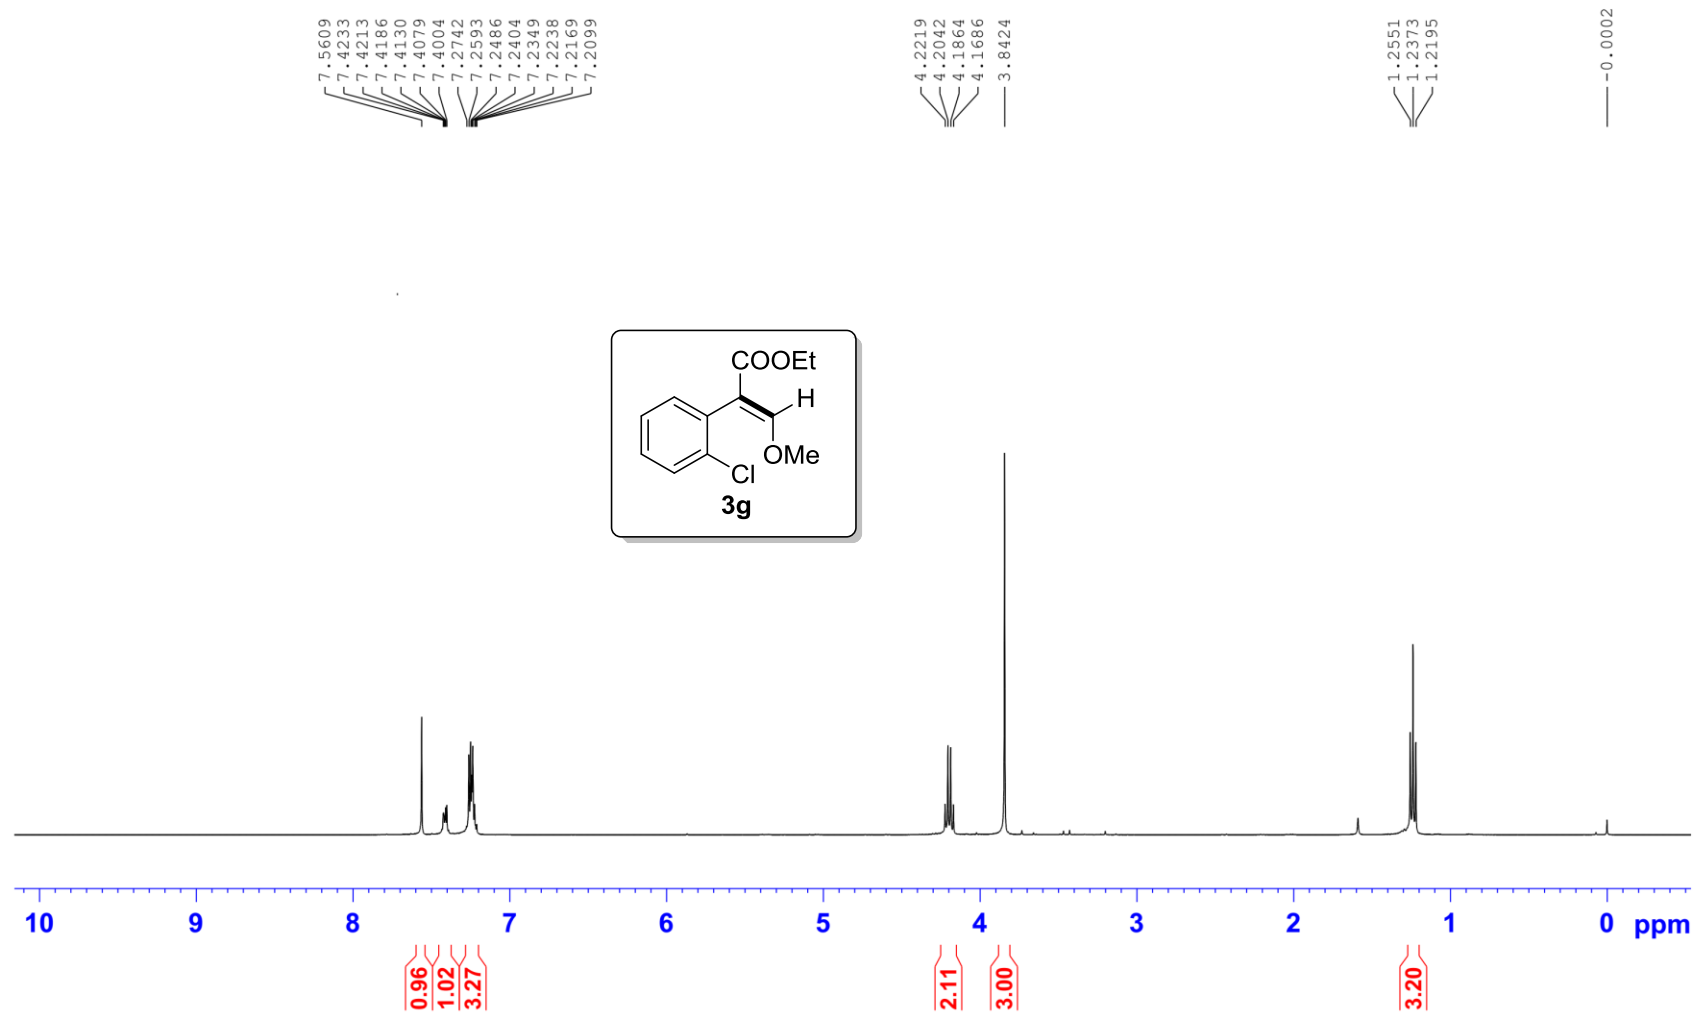

LJW-X160420-1-CNMR (3)

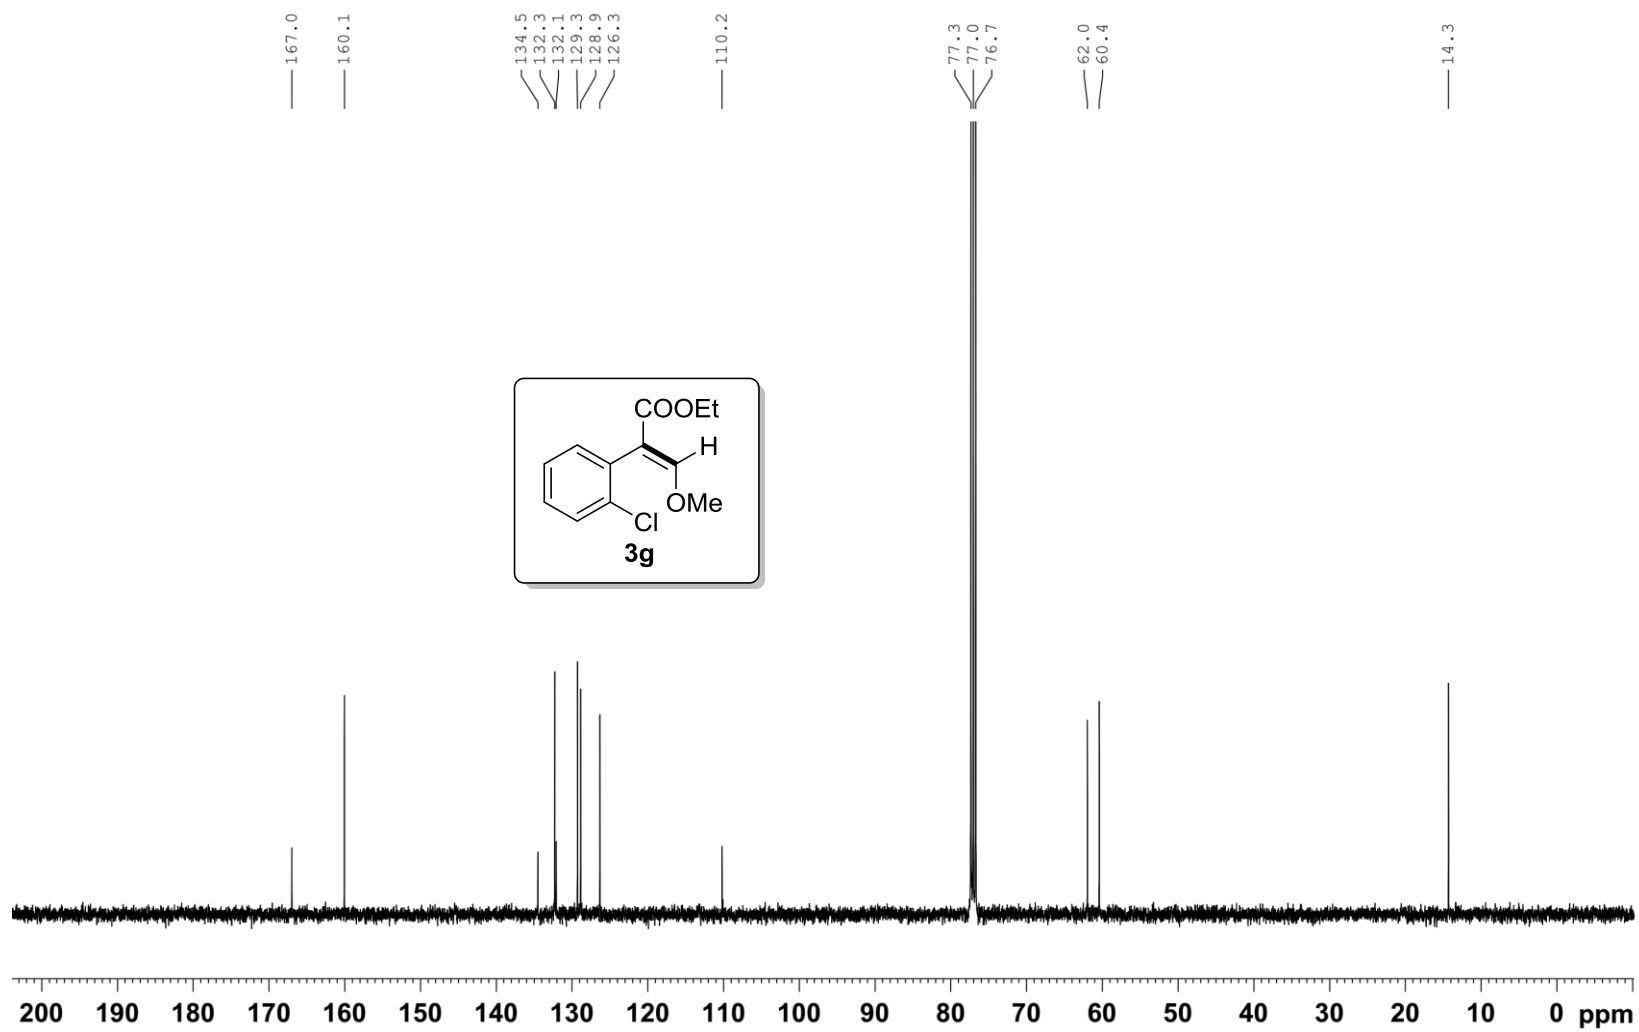

LJW-X160608-6-HNMR

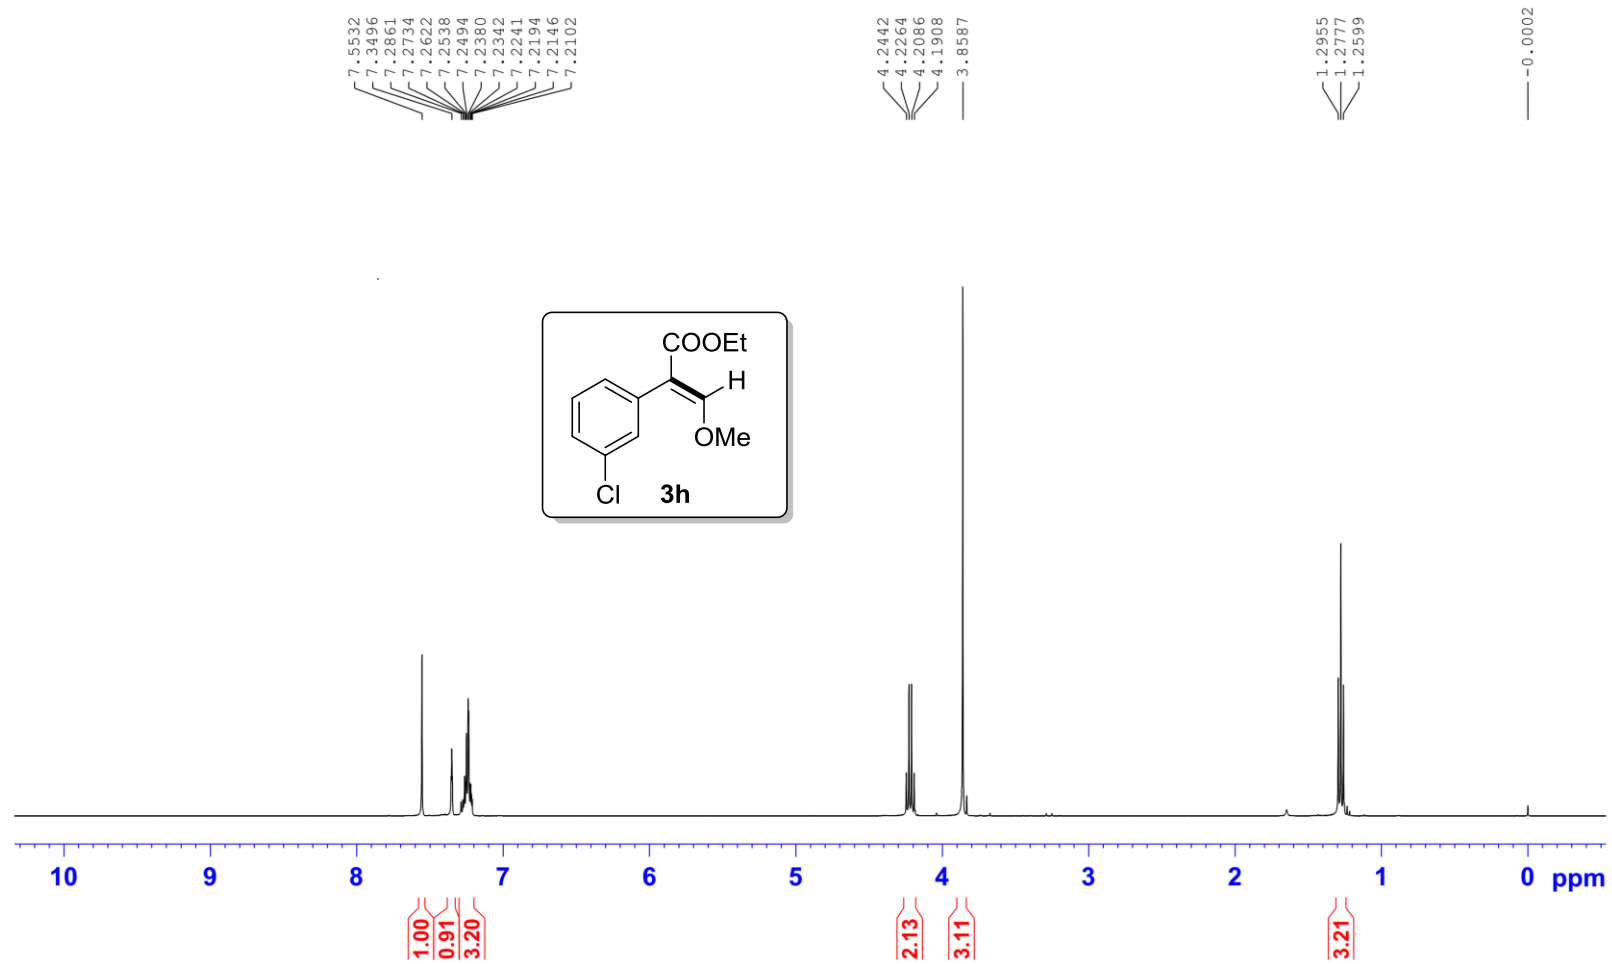

LJW-X160608-6-CNMR

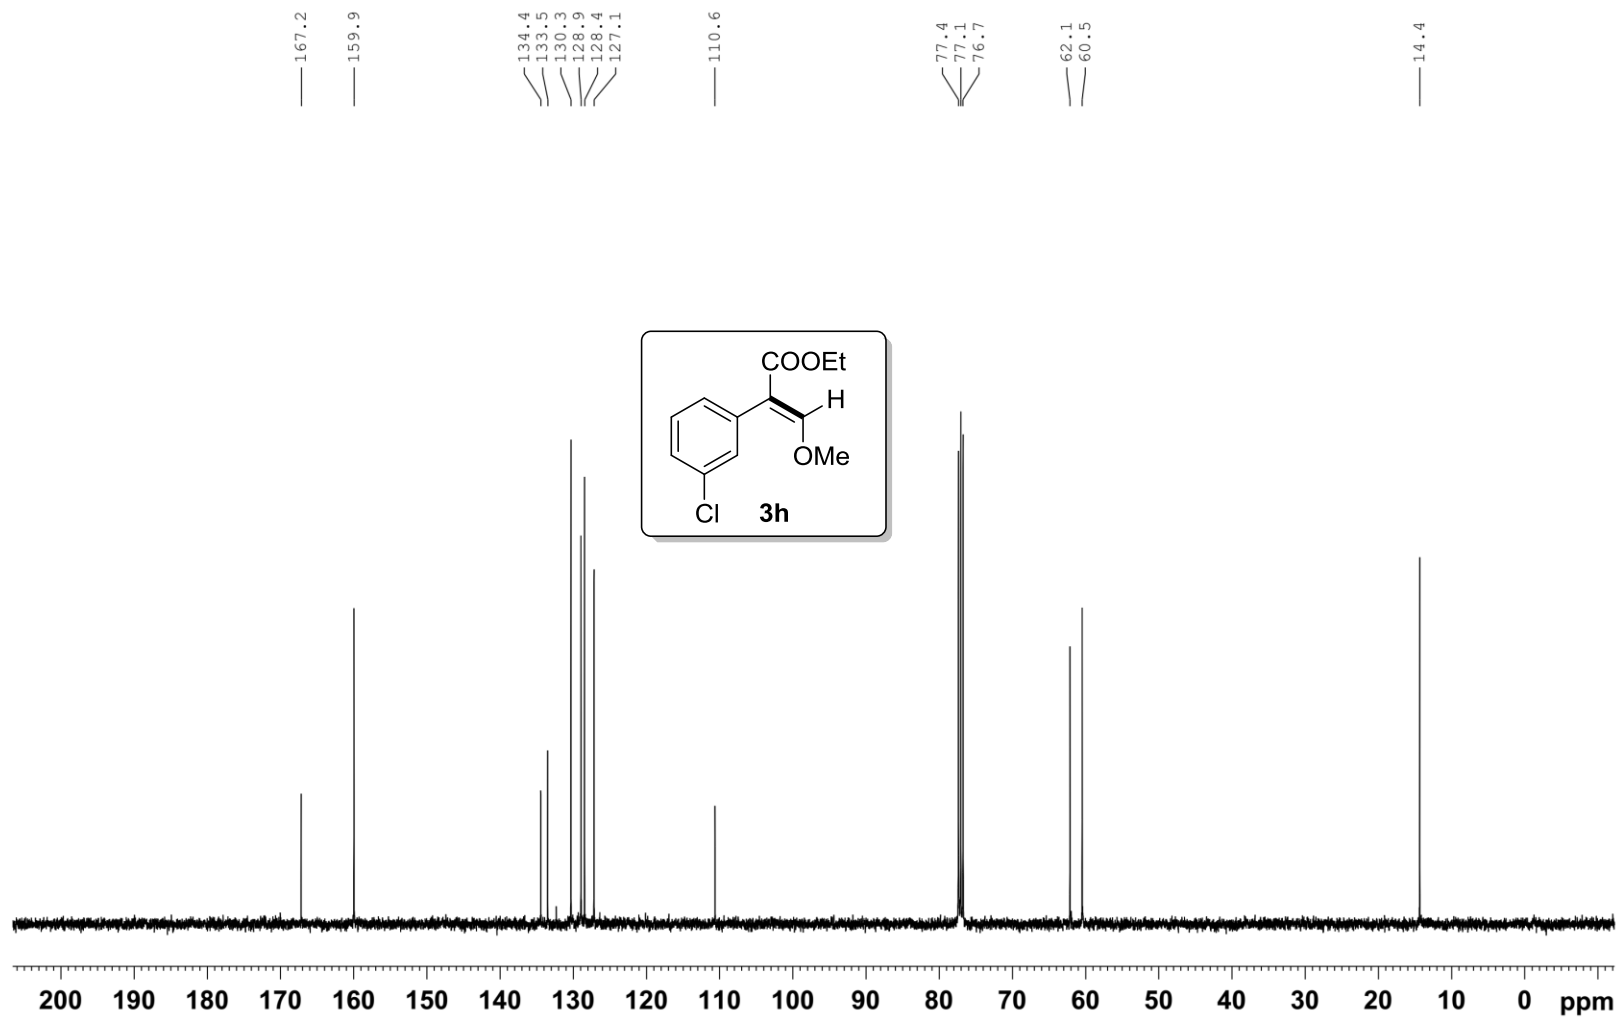

LJW-X160531-2-HNMR (10)

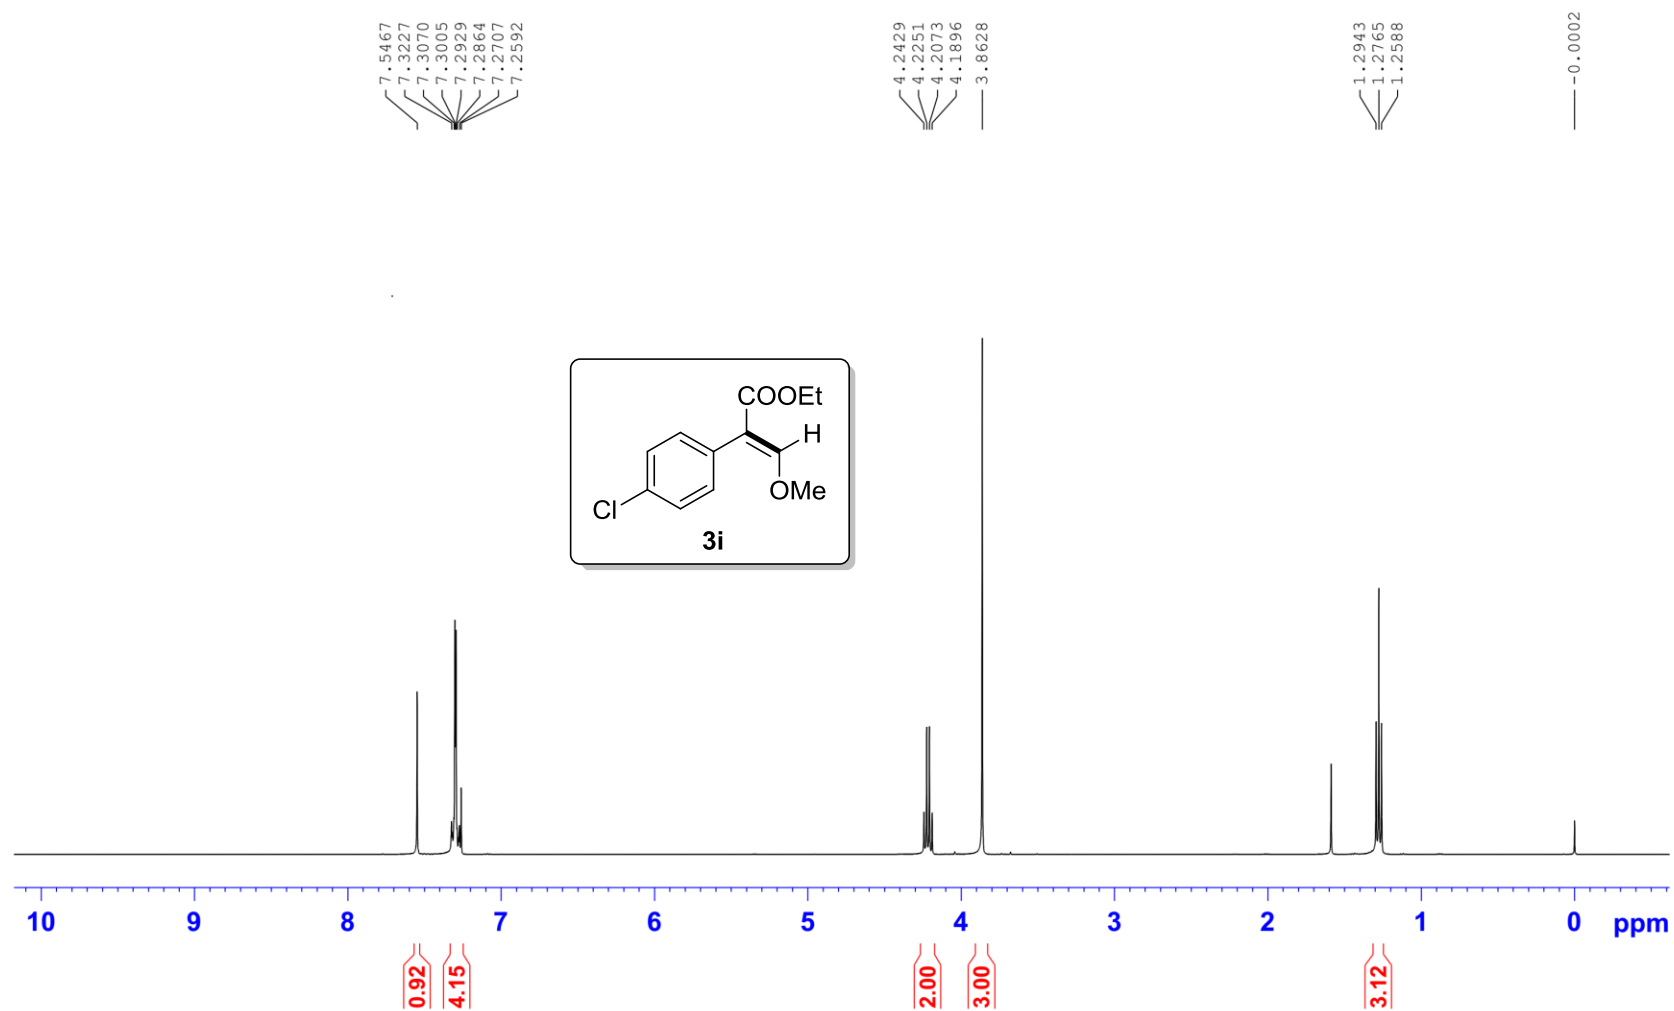

LJW-X160531-2-CNMR (11)

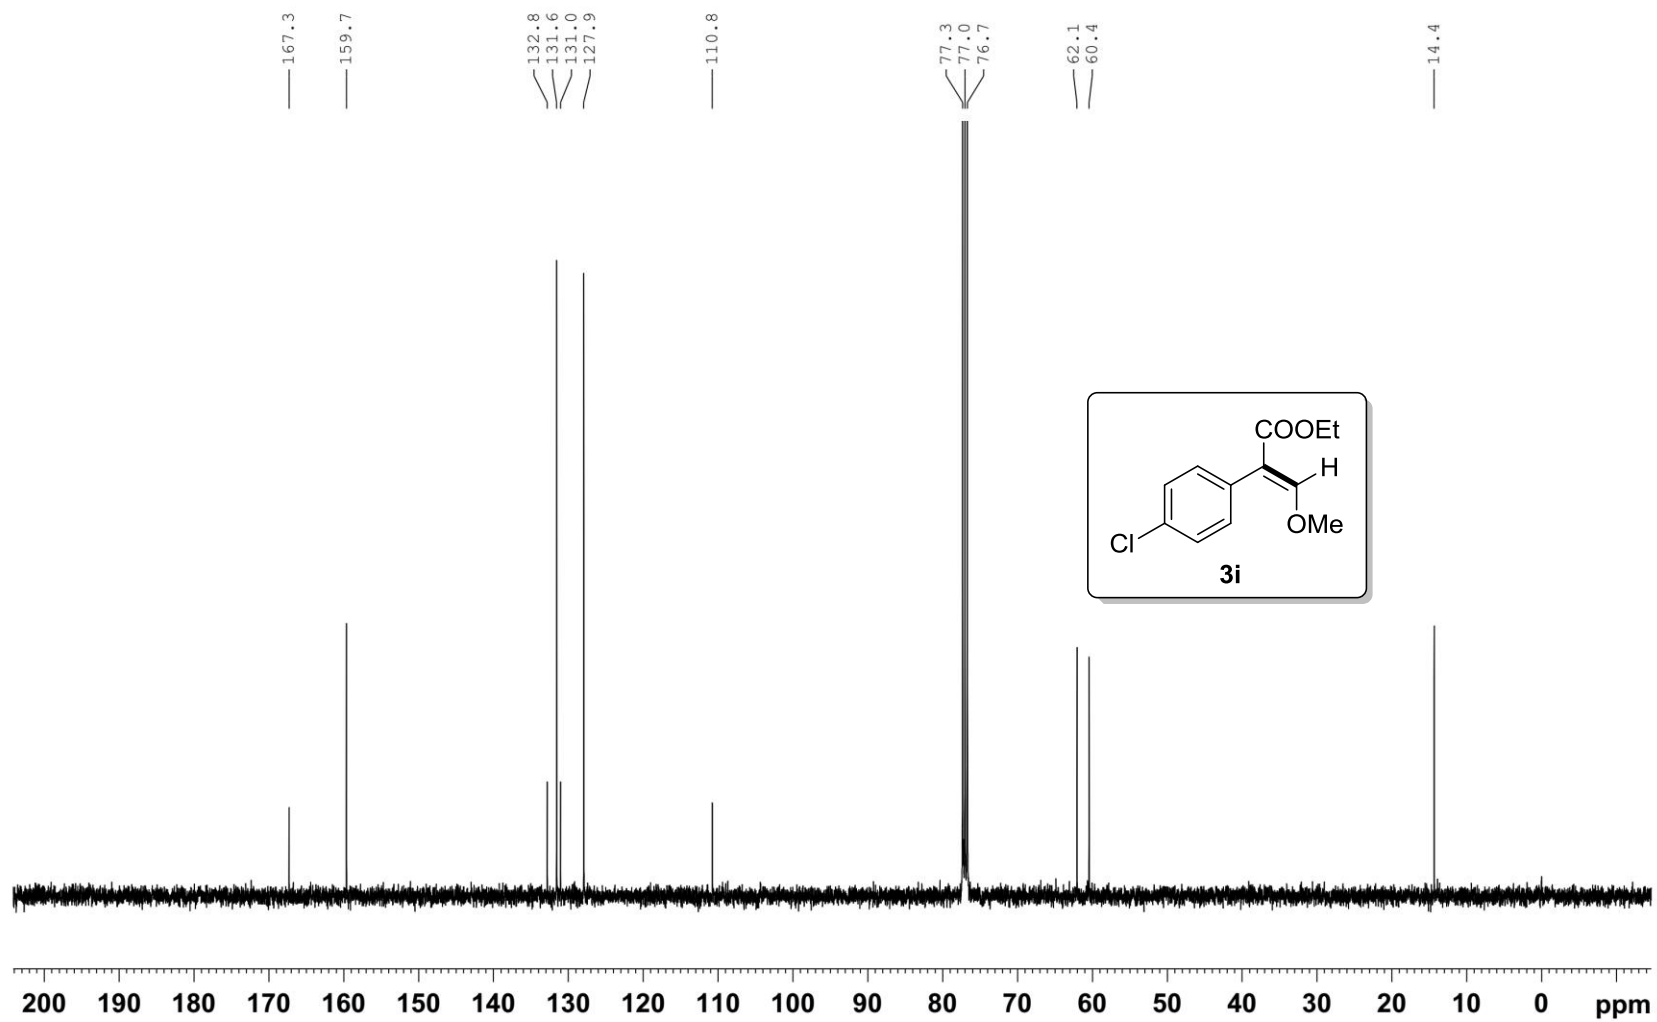

LJW-X160516-4-HNMR (4)

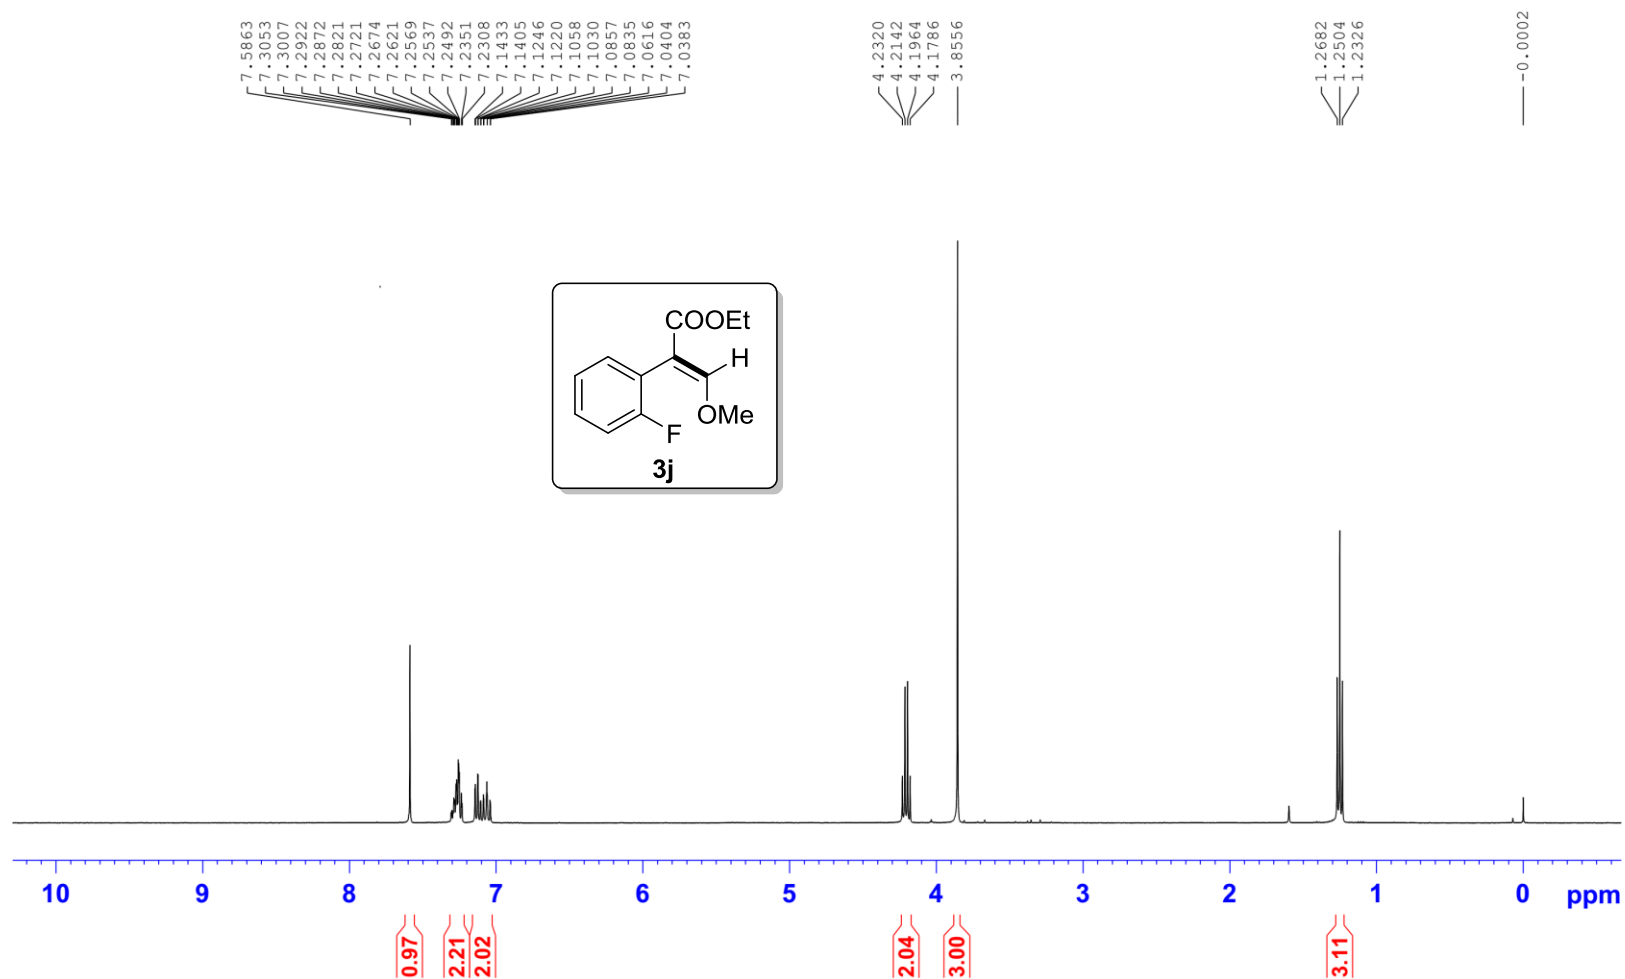

LJW-X160517-3-CNMR (20)

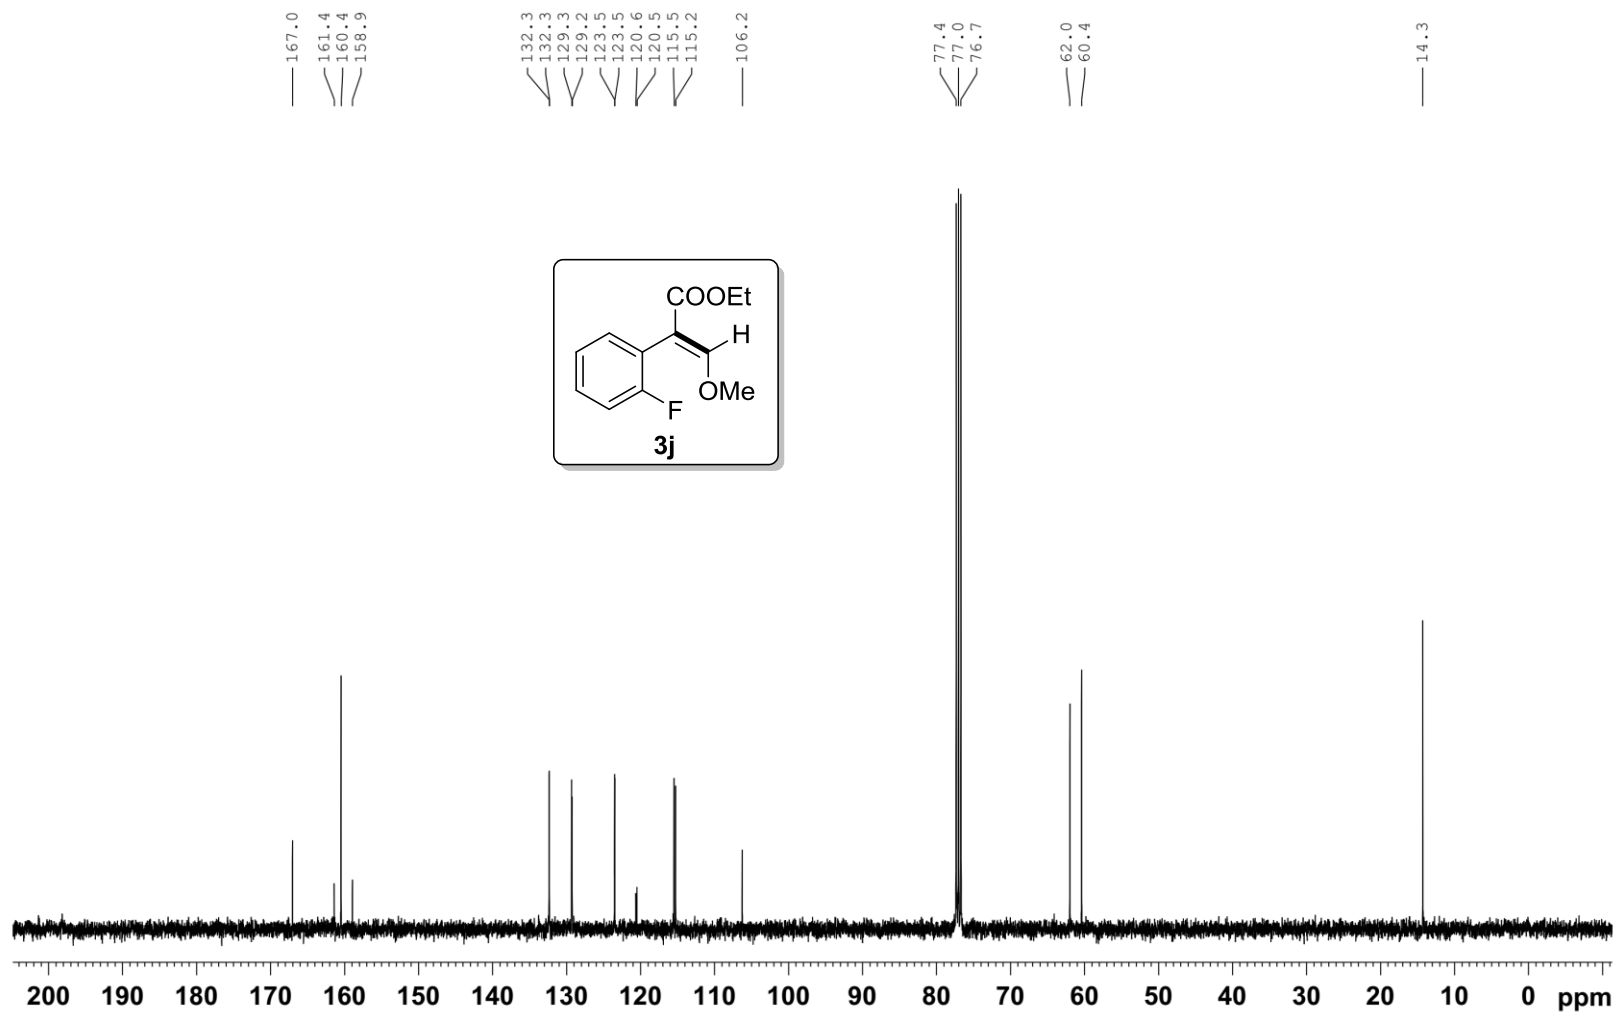

LJW-X160516-4-FNMR (31)

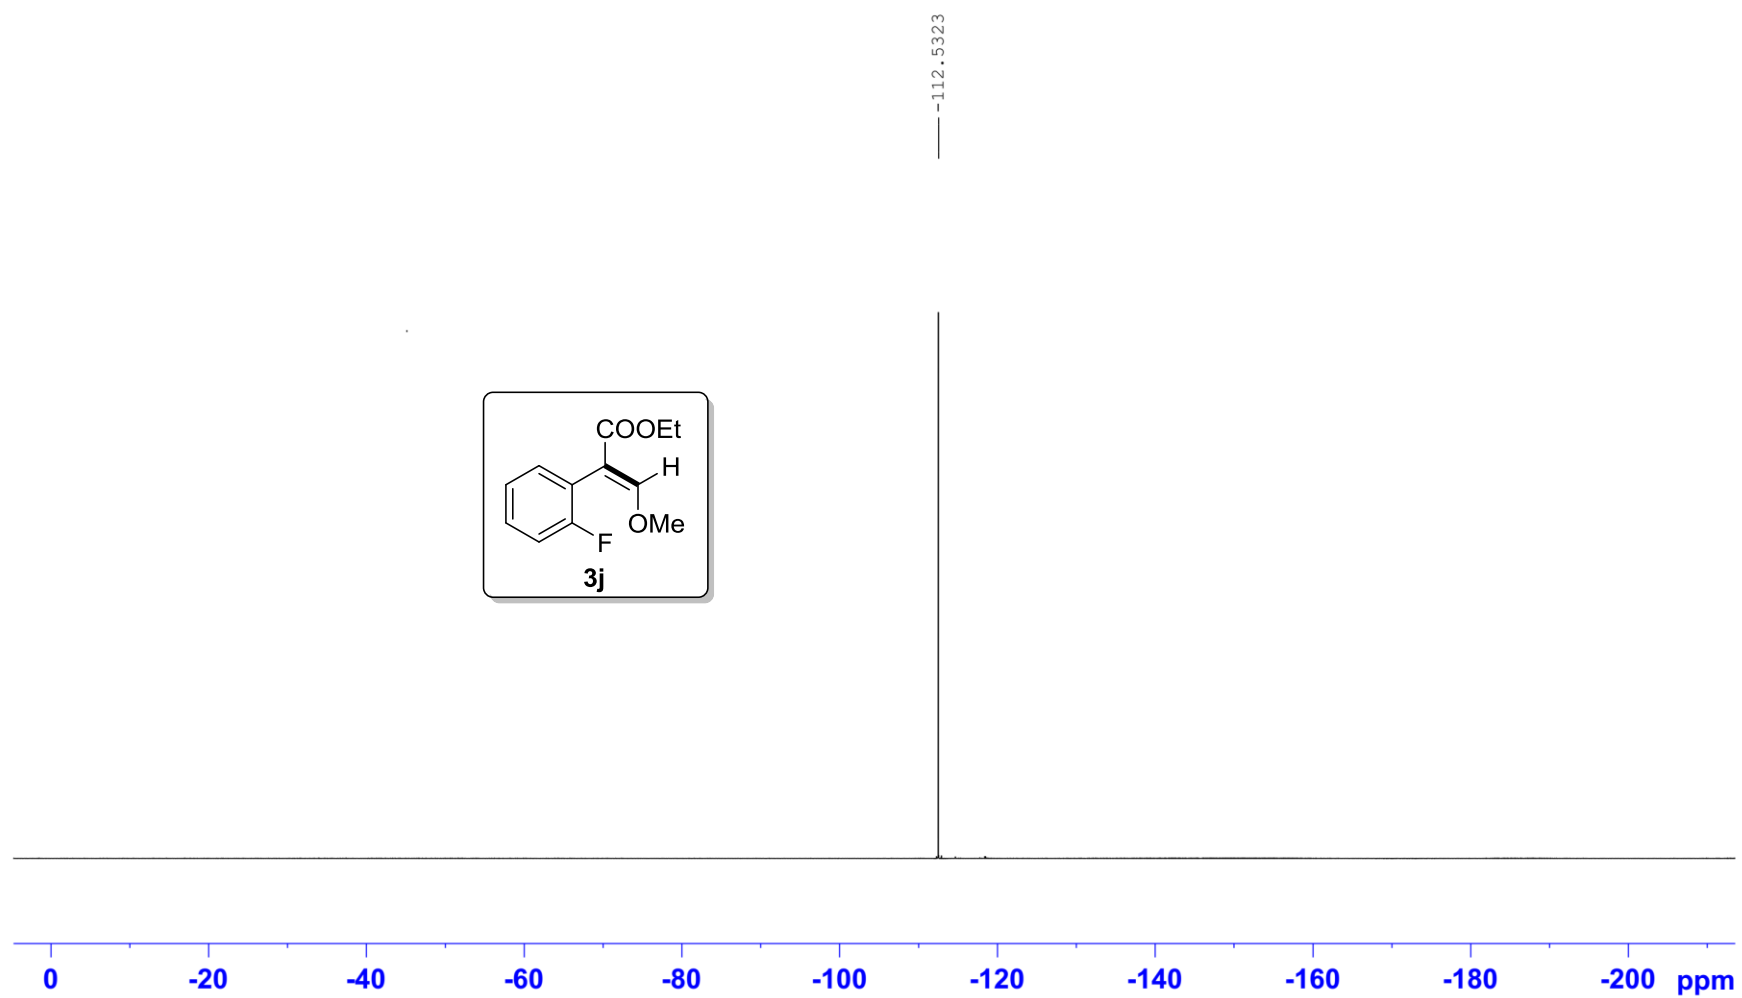

LJW-X180914-1-HNMR

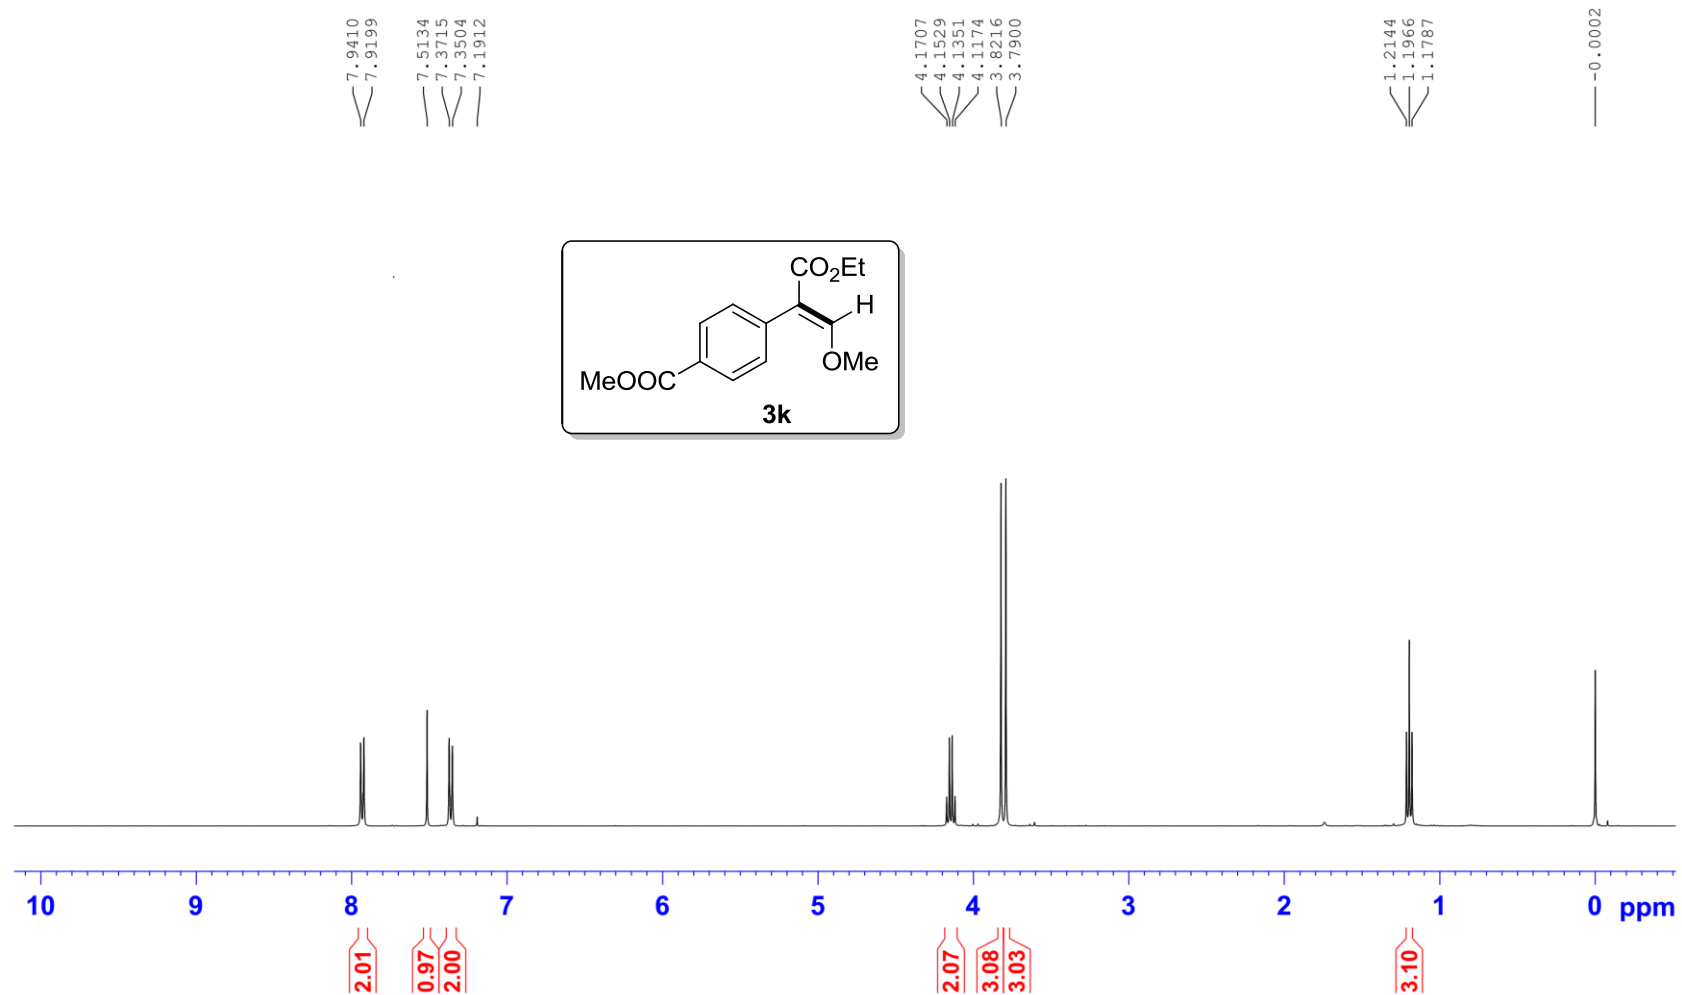

LJW-X180914-1-CNMR

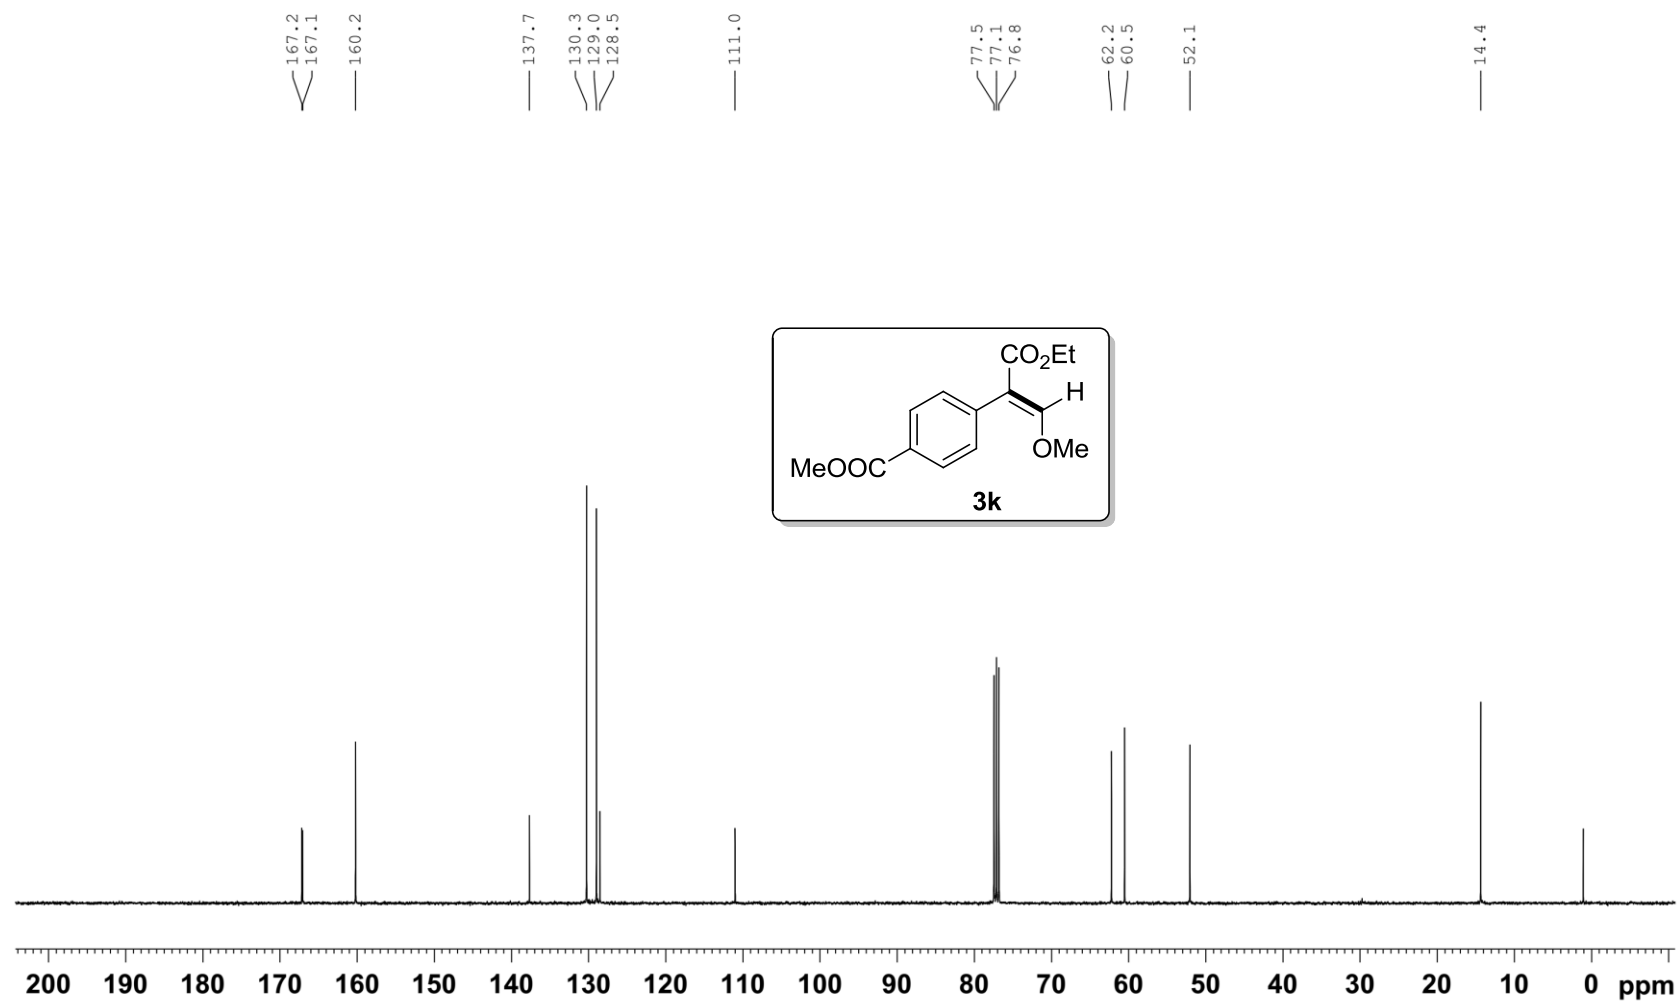

LJW-X180907-6-HNMR

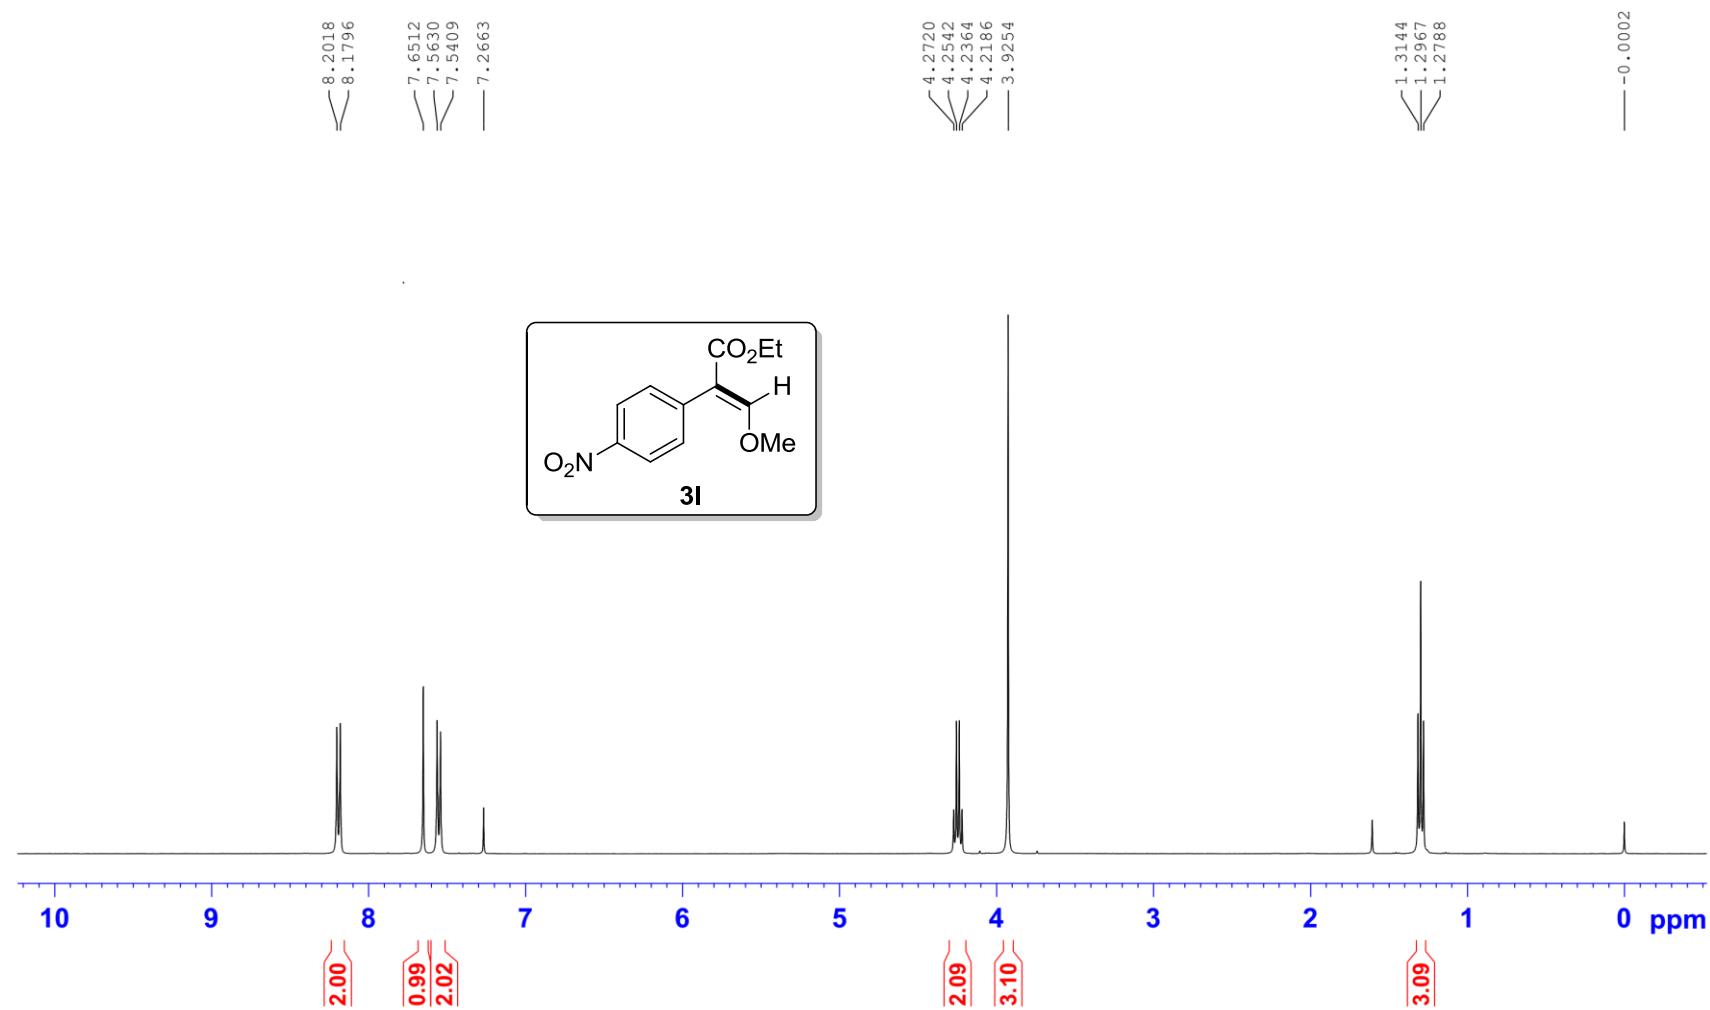

LJW-X180907-6-CNMR

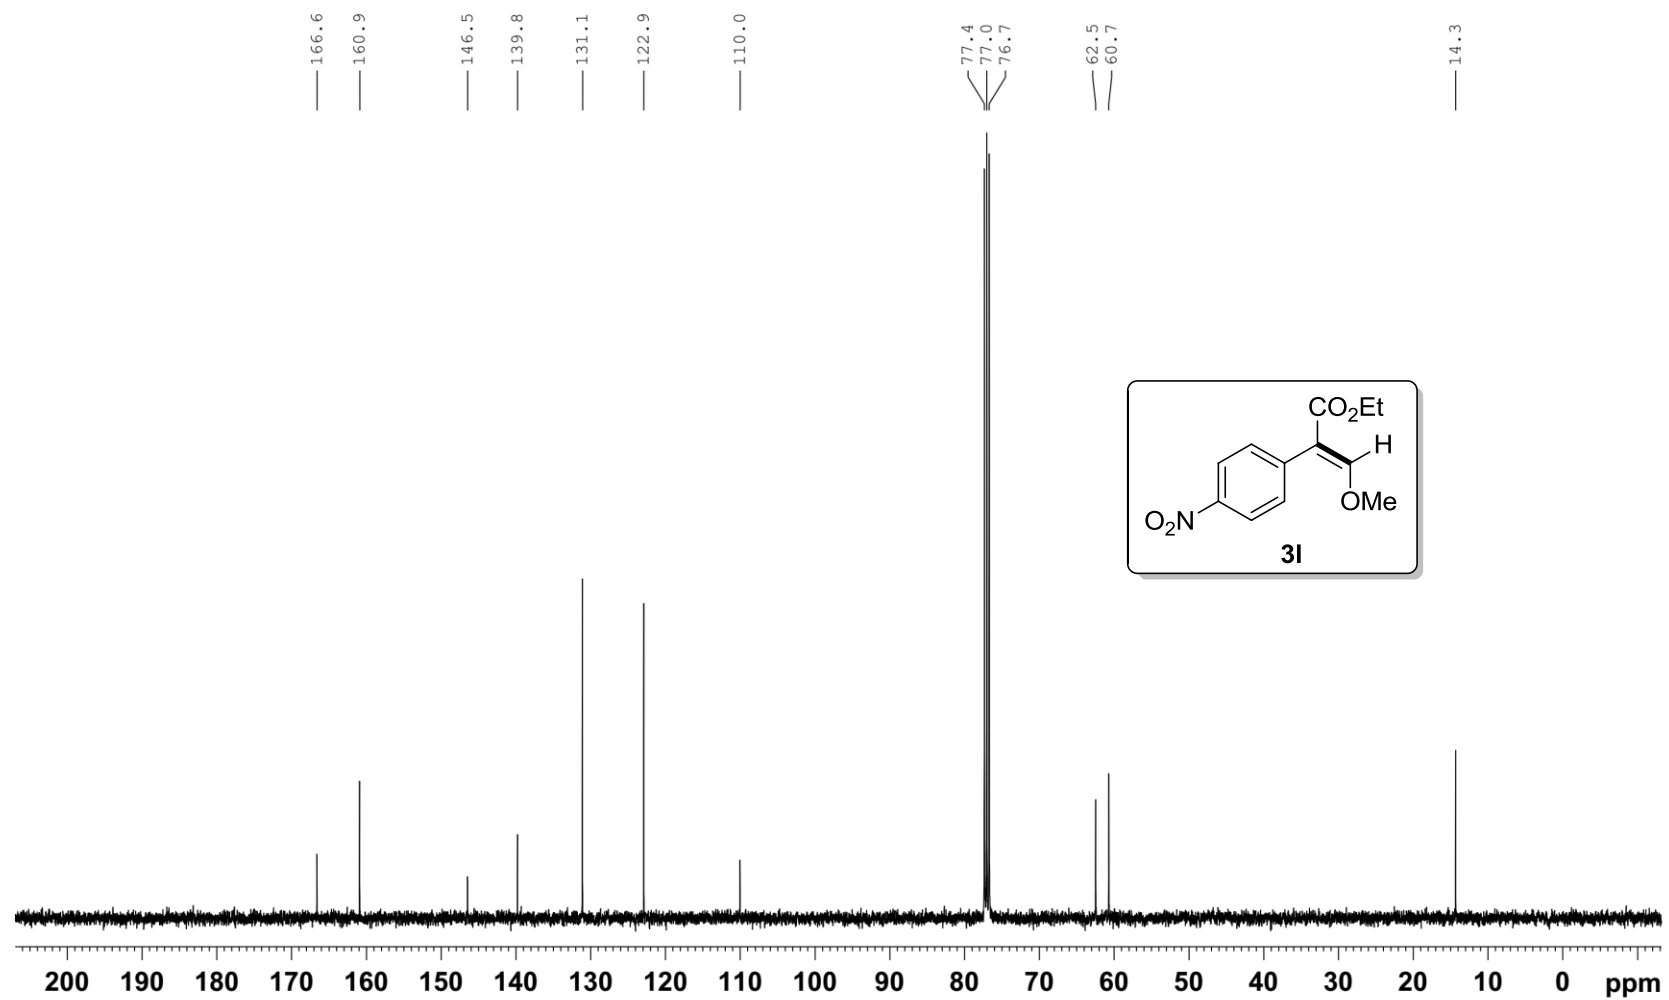

LJW-X180907-2-HNMR

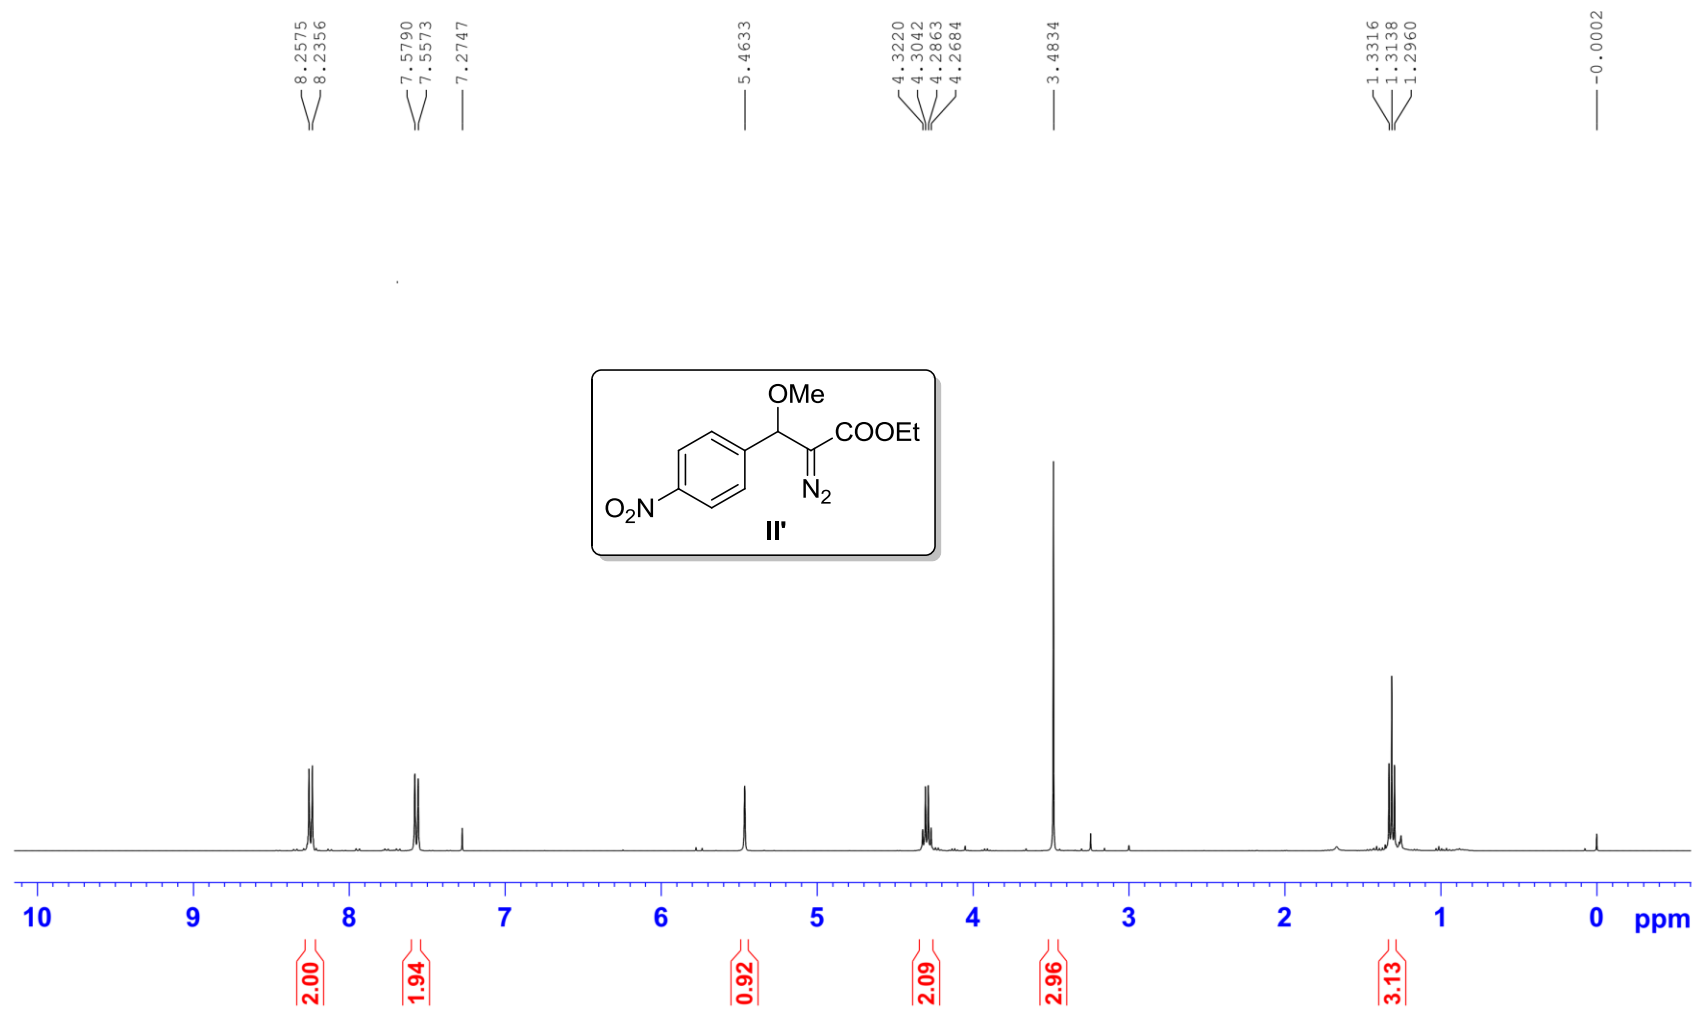

LJW-X180907-2-CNMR

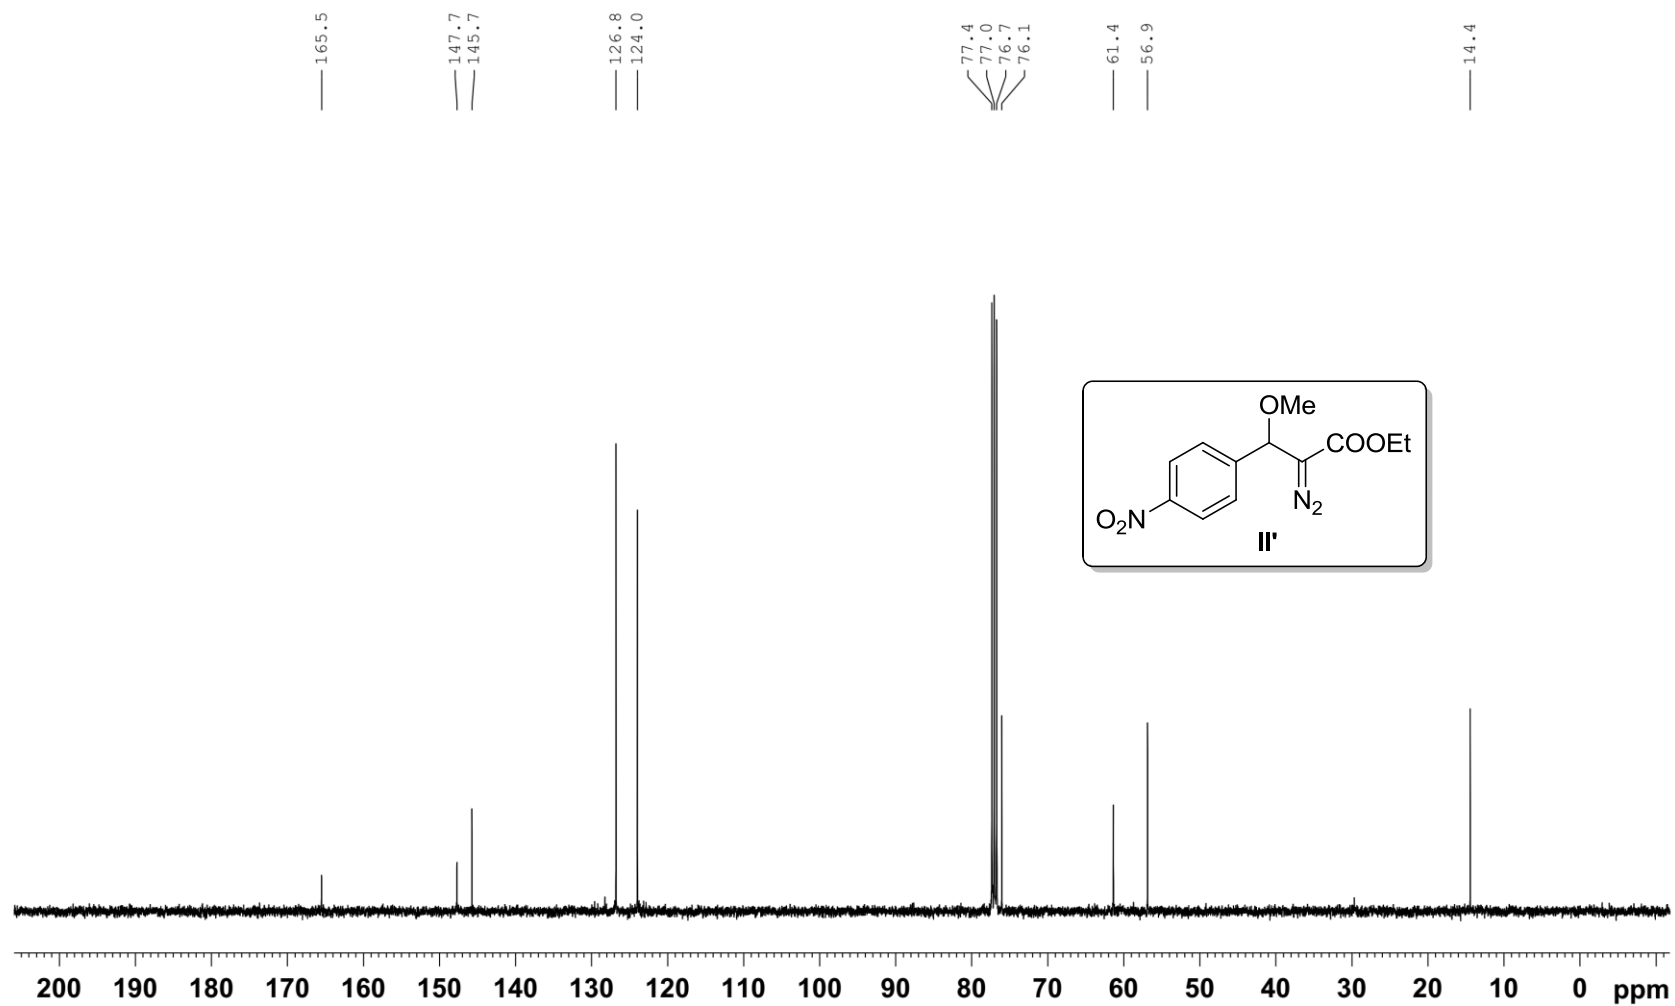

LJW-X160518-2-HNMR (2)

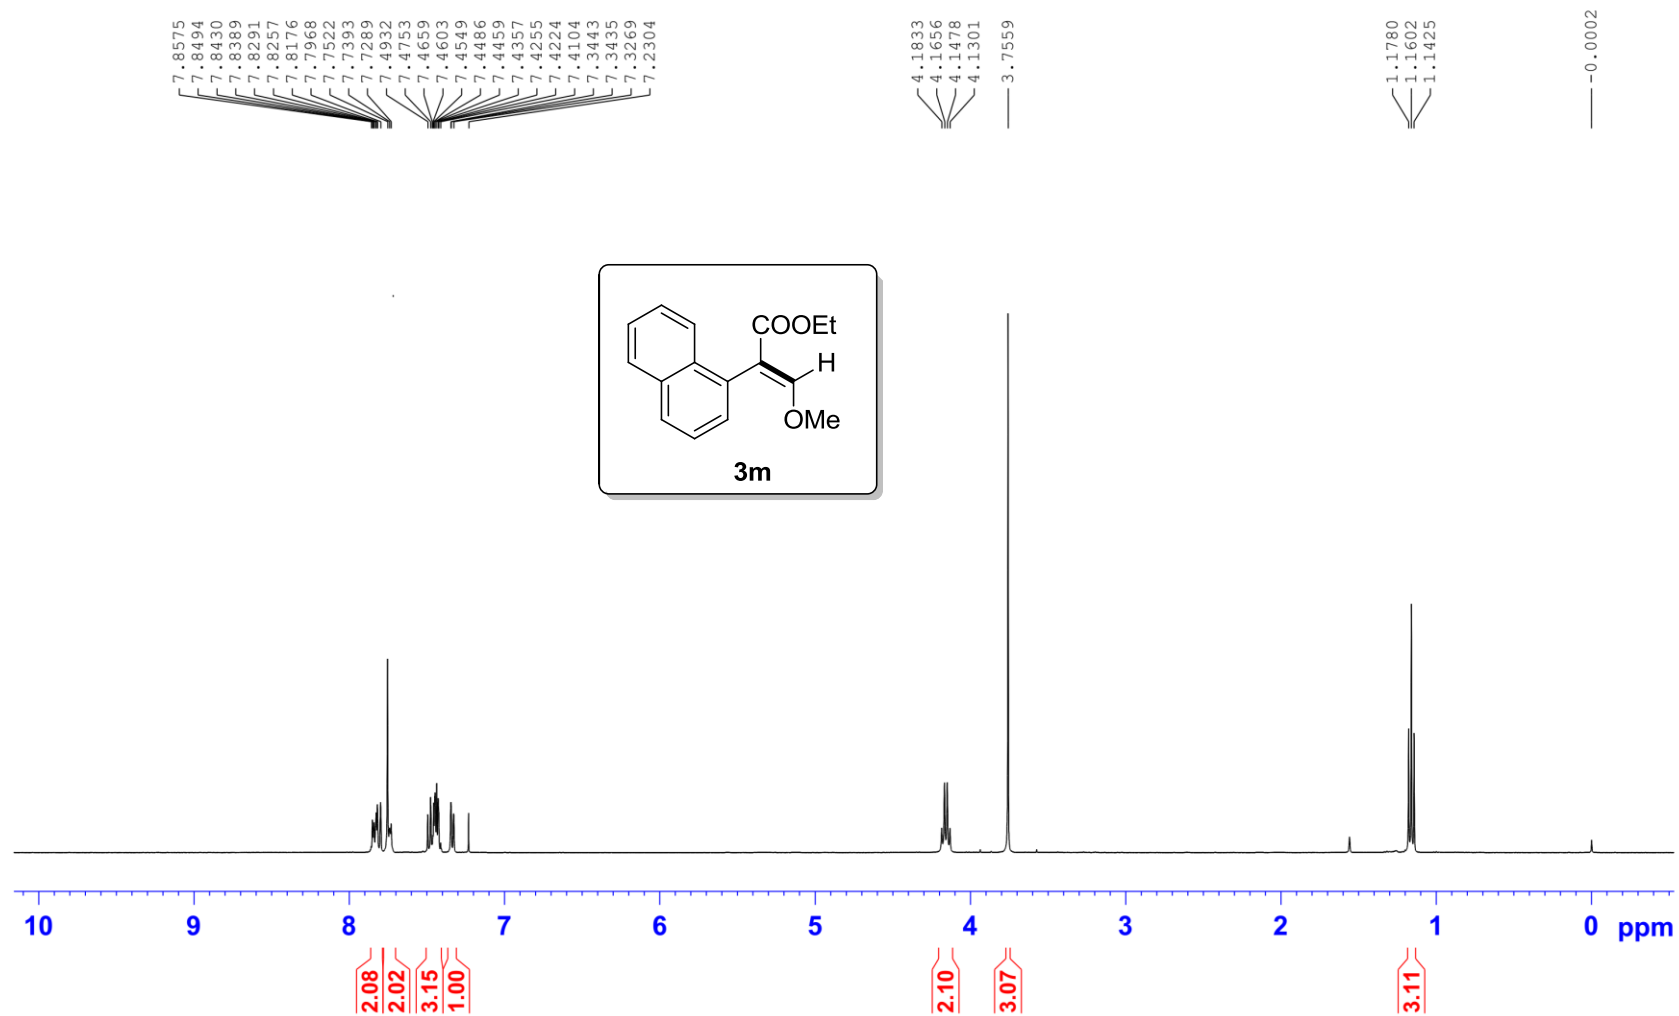

LJW-X160518-2-CNMR (14)

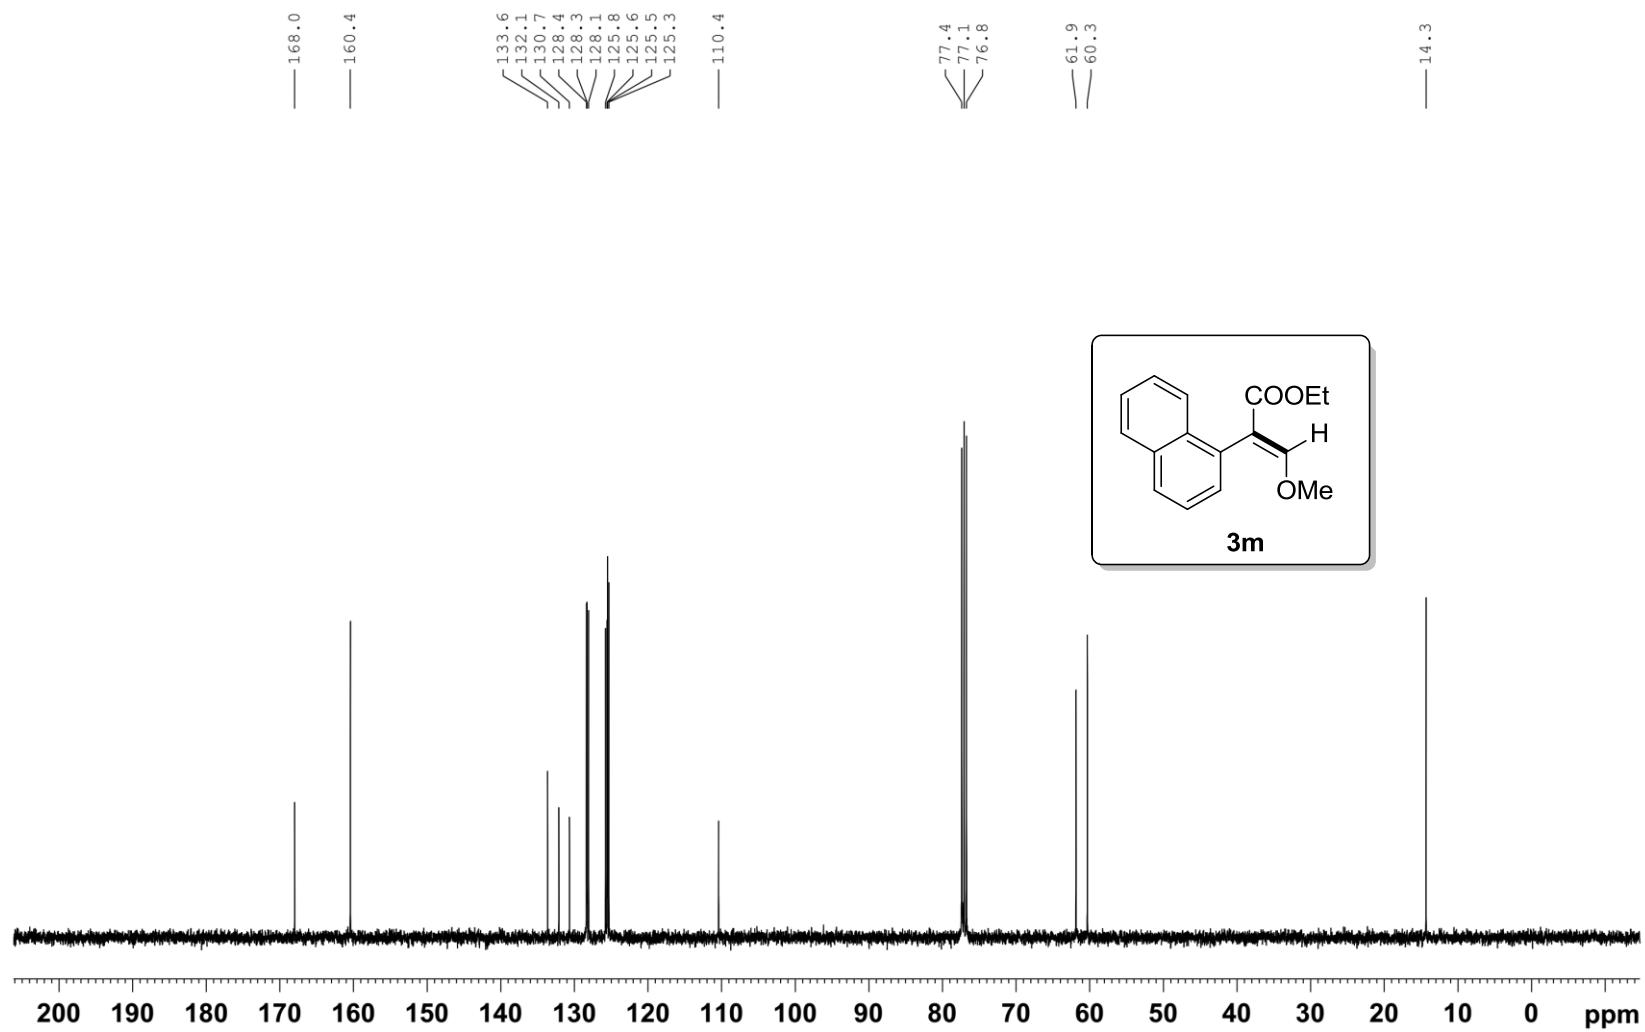

LJW-X160516-5-HNMR (5)

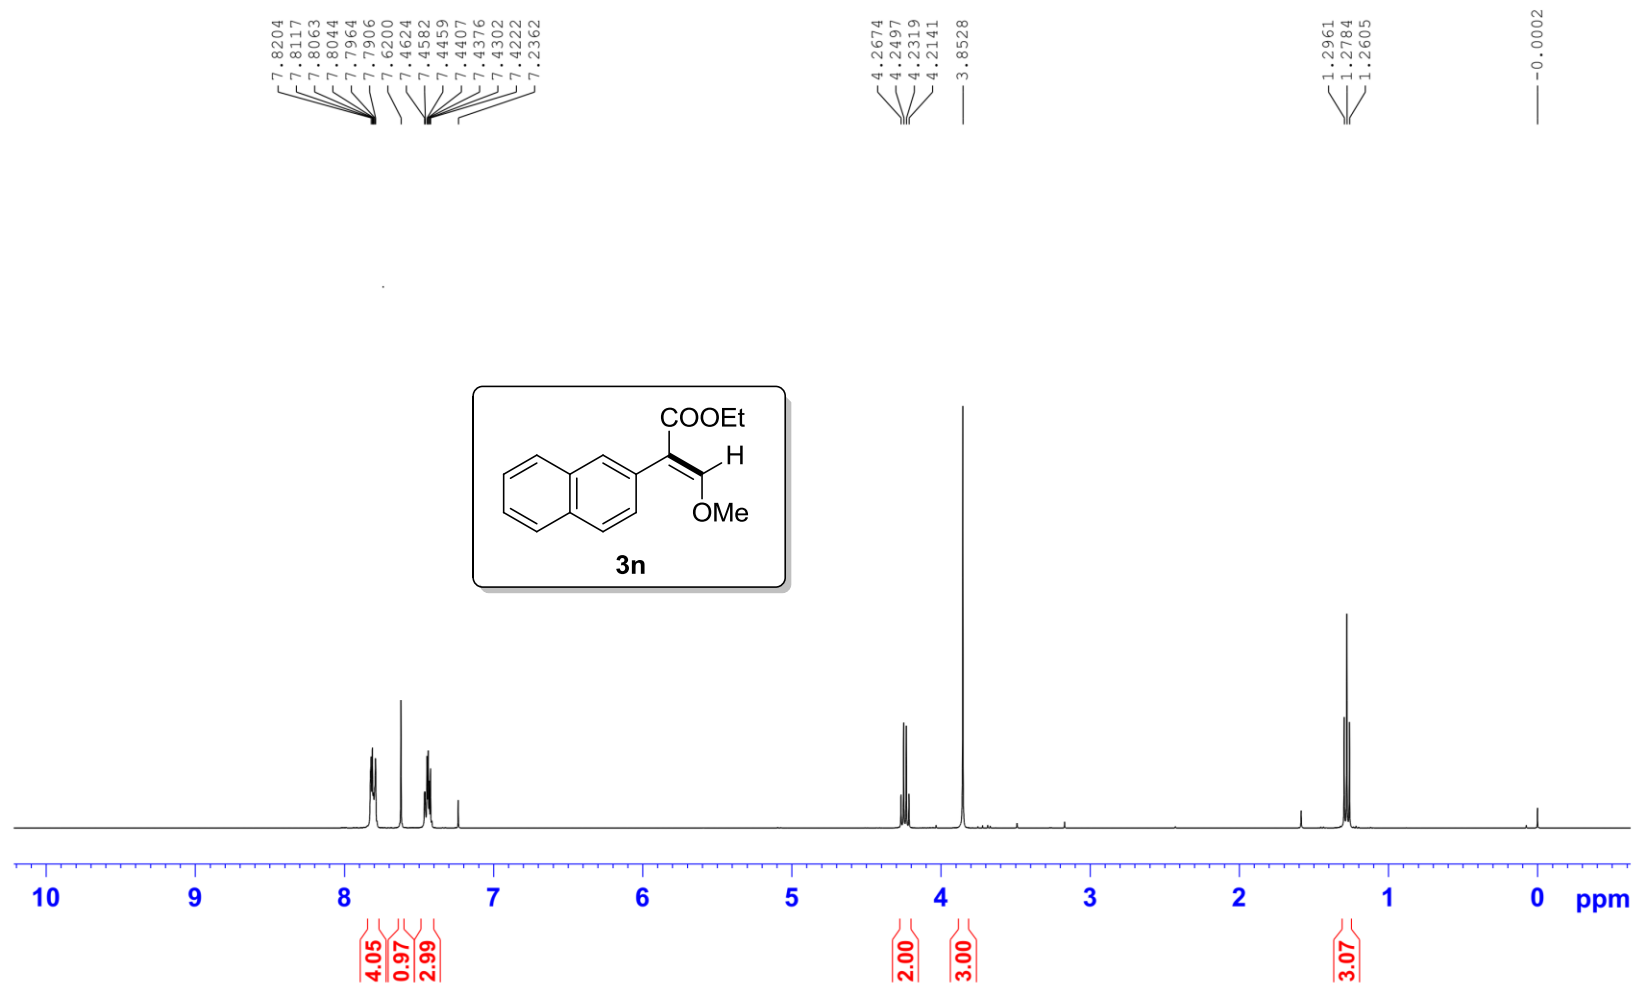

LJW-X160516-5-CNMR (33)

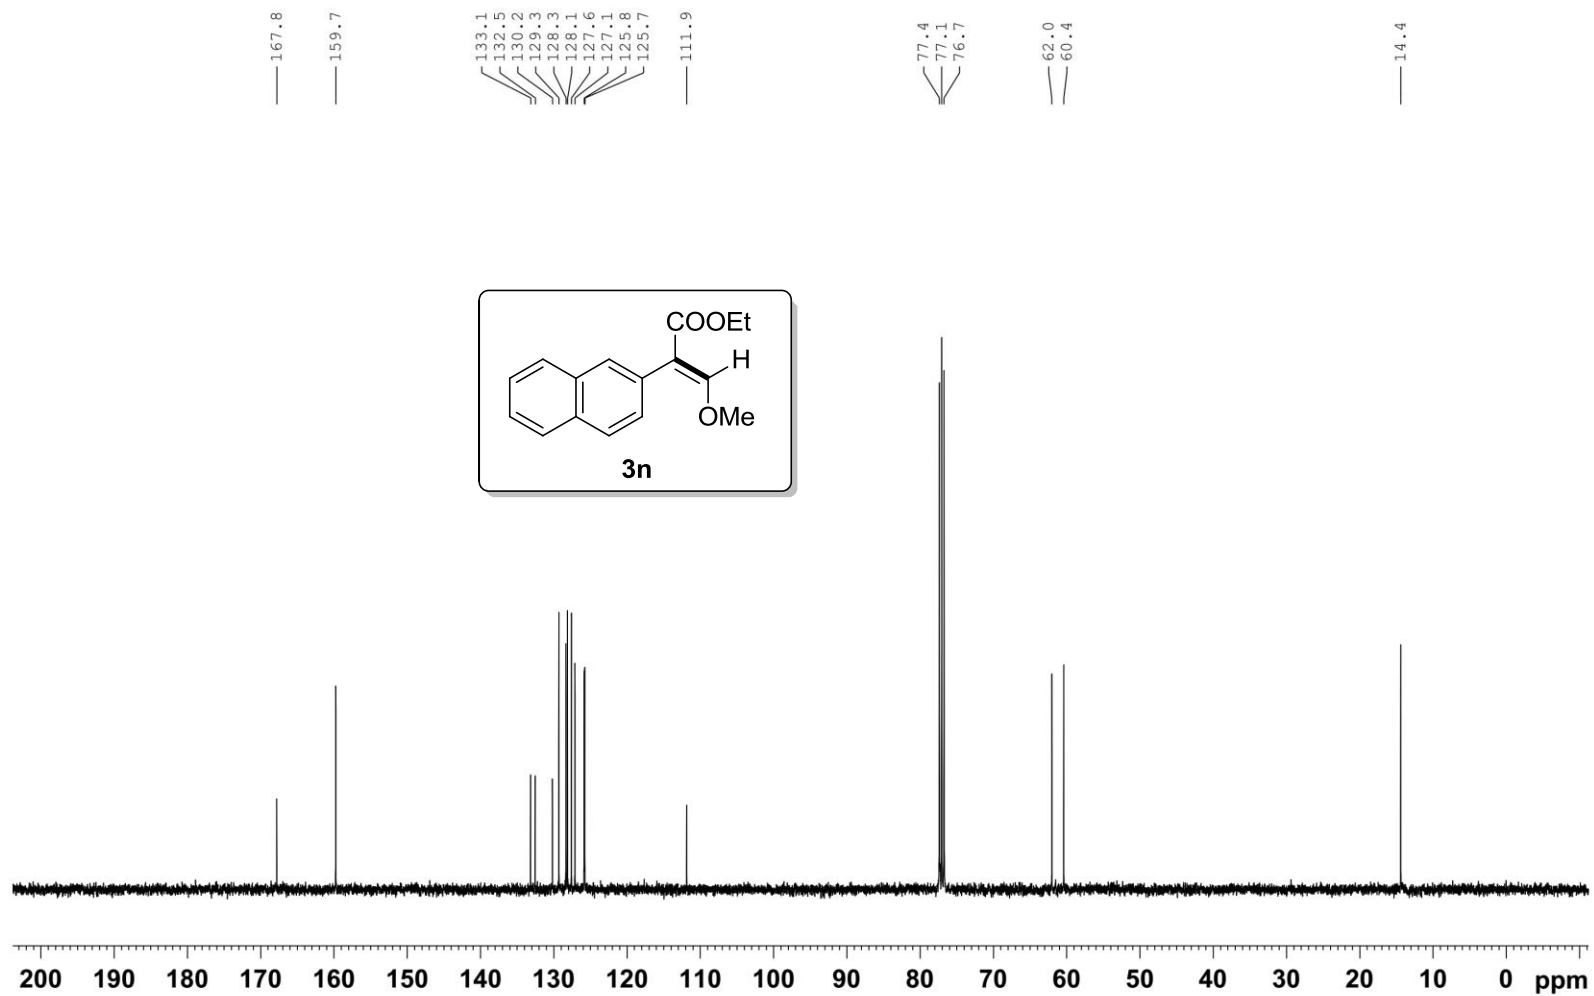

LJW-X16Y09-1-HNMR

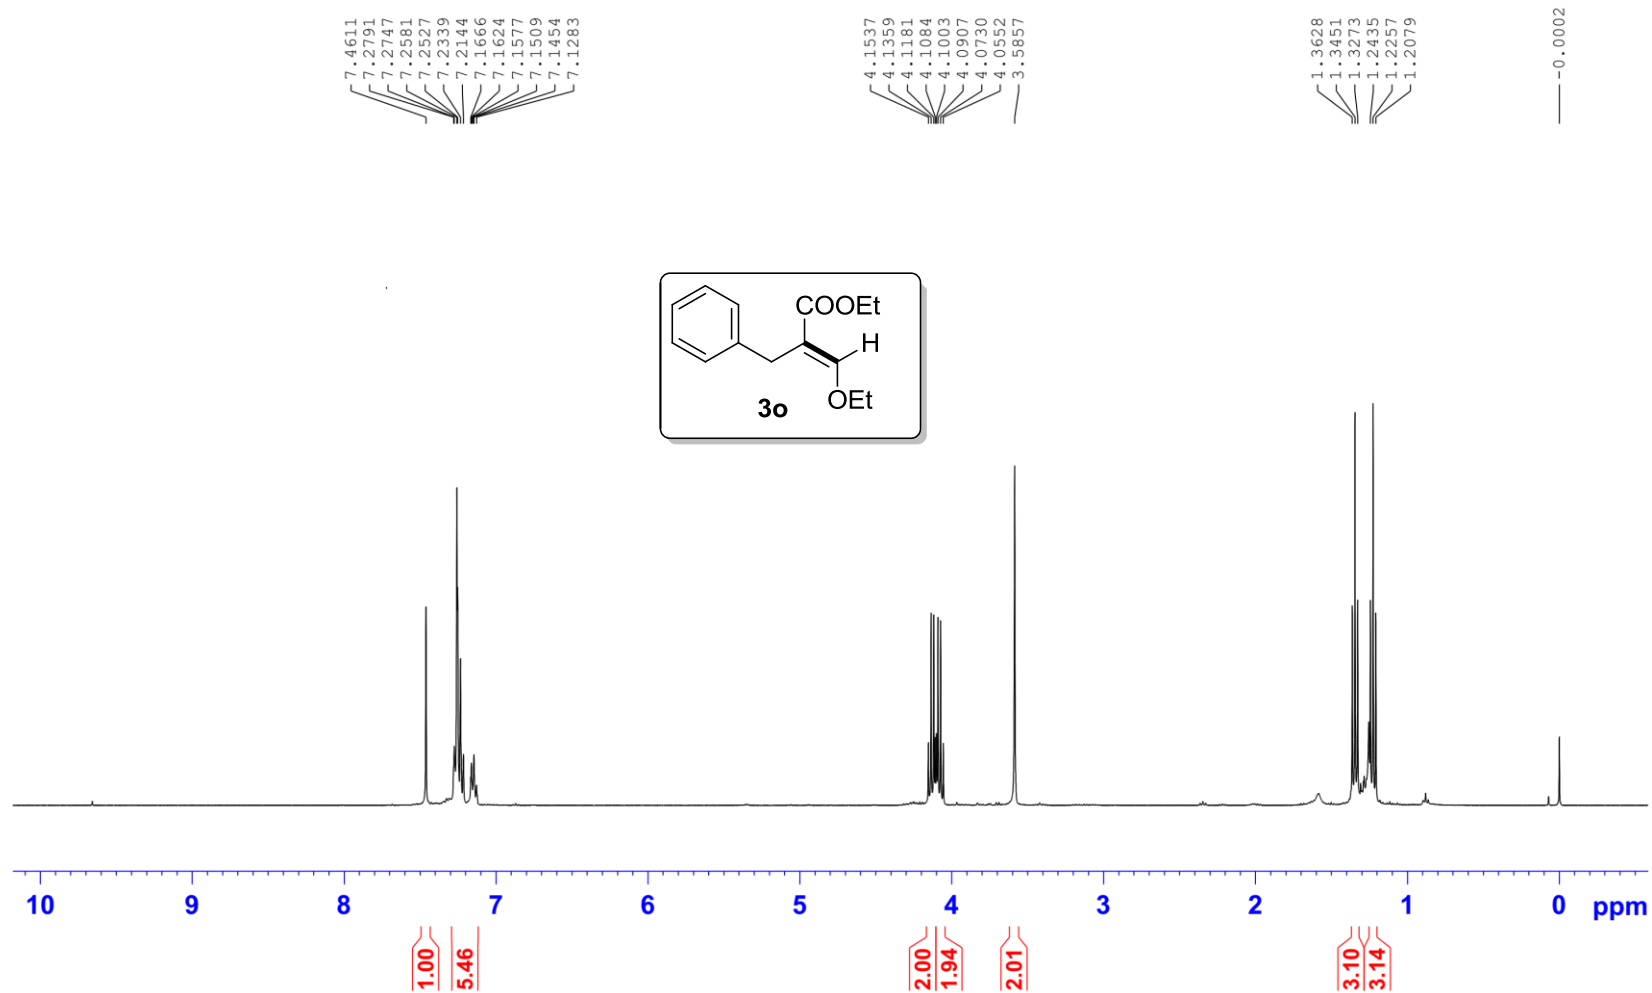

LJW-X16Y09-1-CNMR

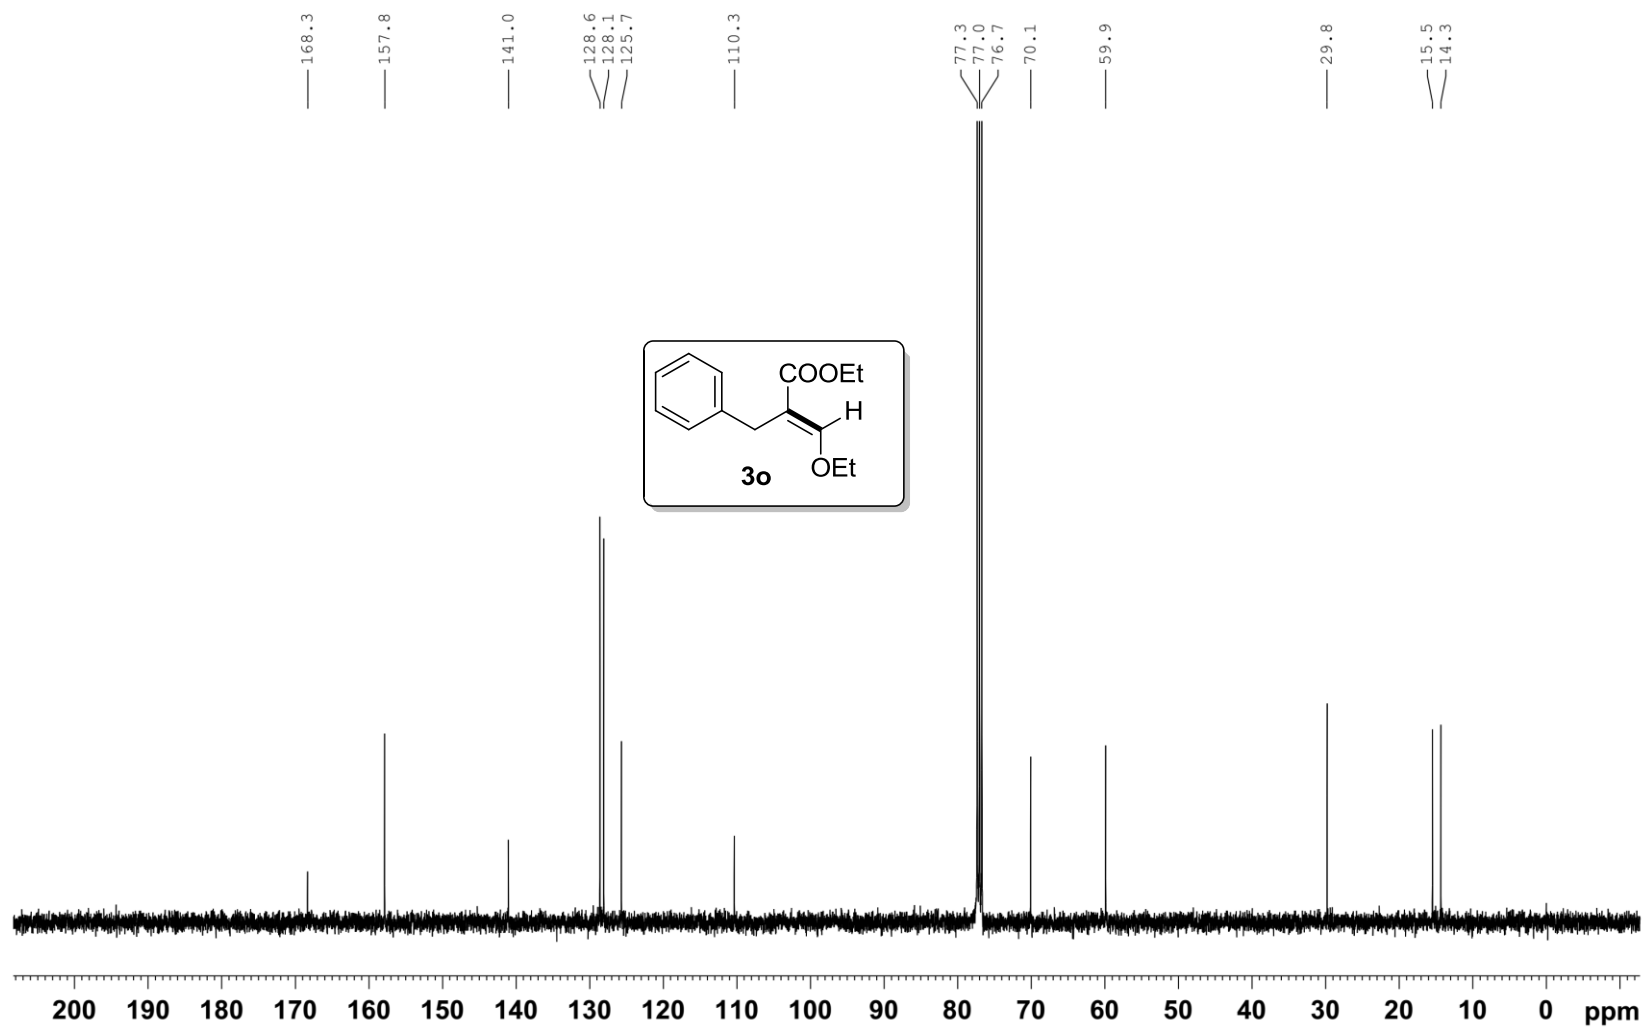

LJW-X180917-8-HNMR

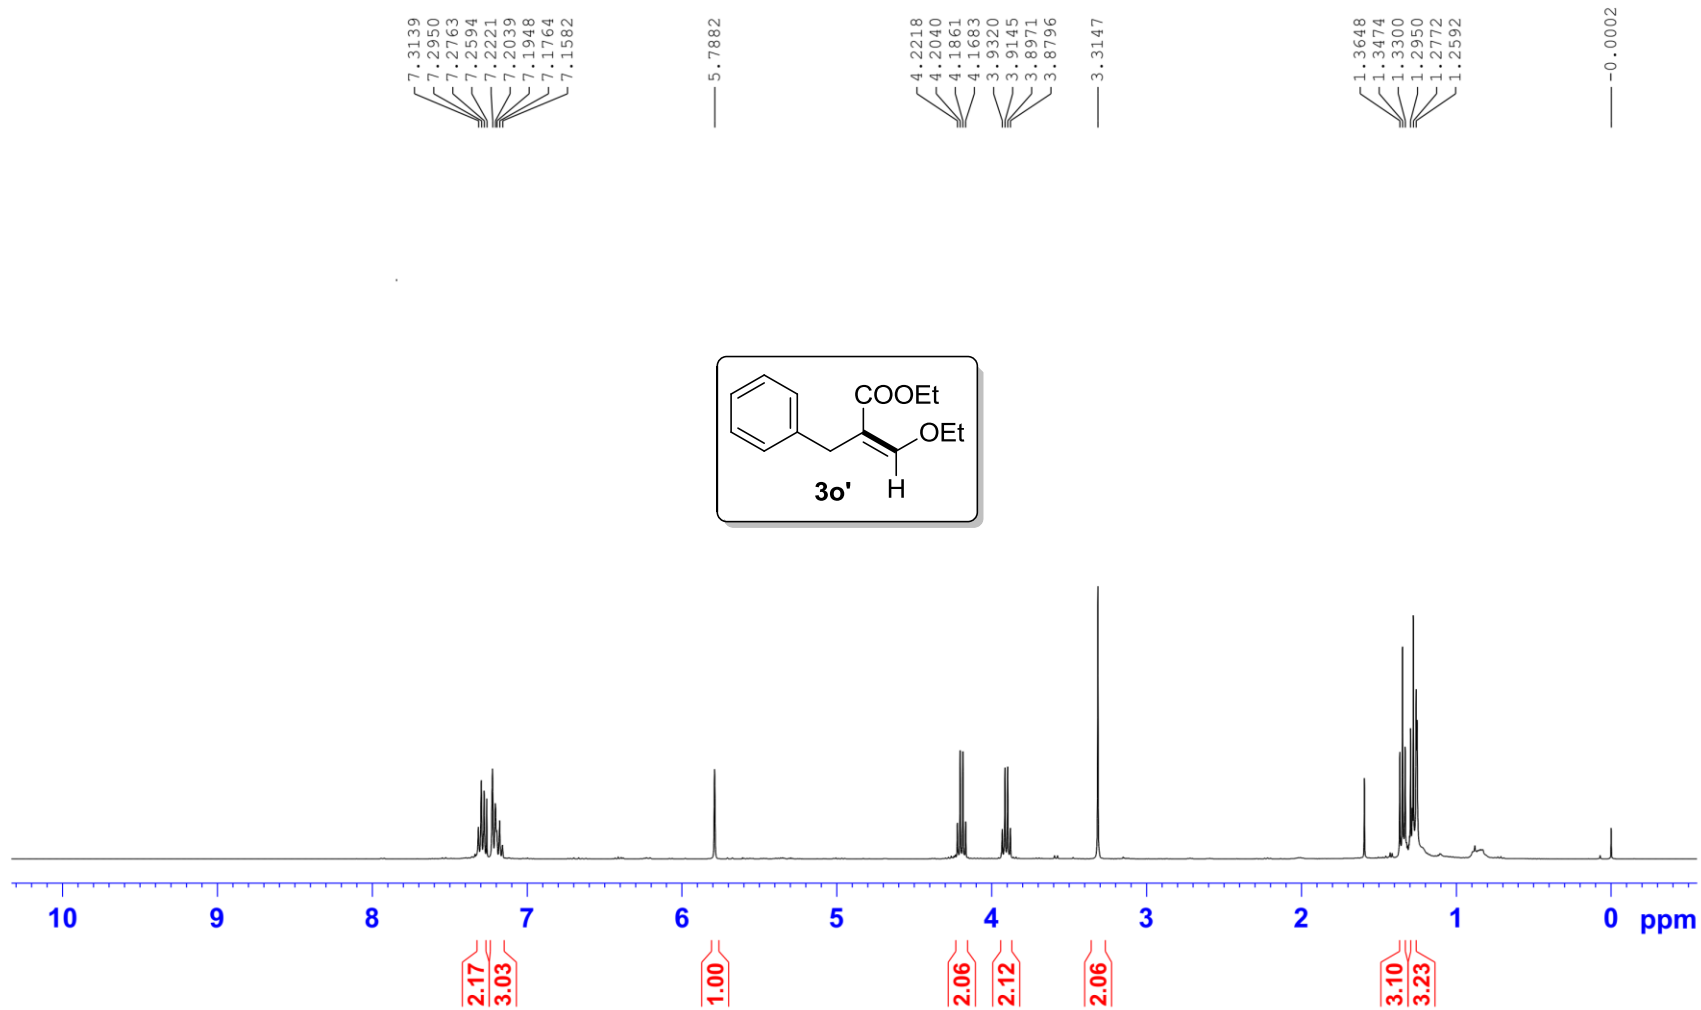

LJW-X180917-8-CNMR

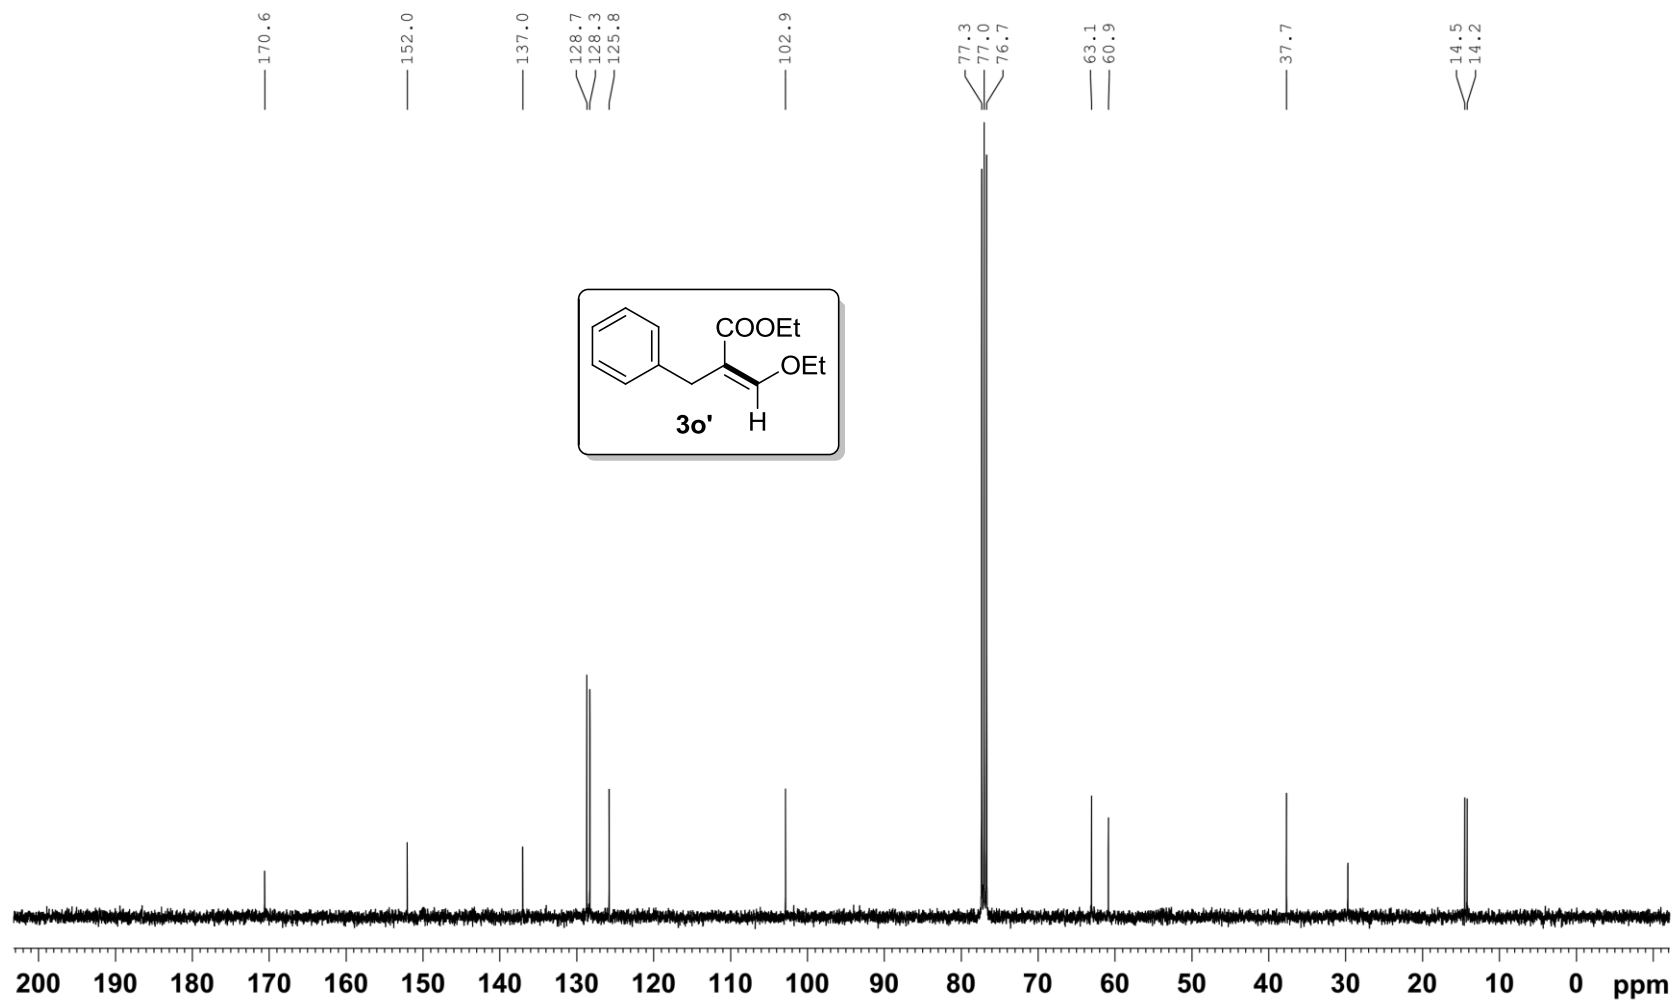

LJW-X180523-9-HNMR

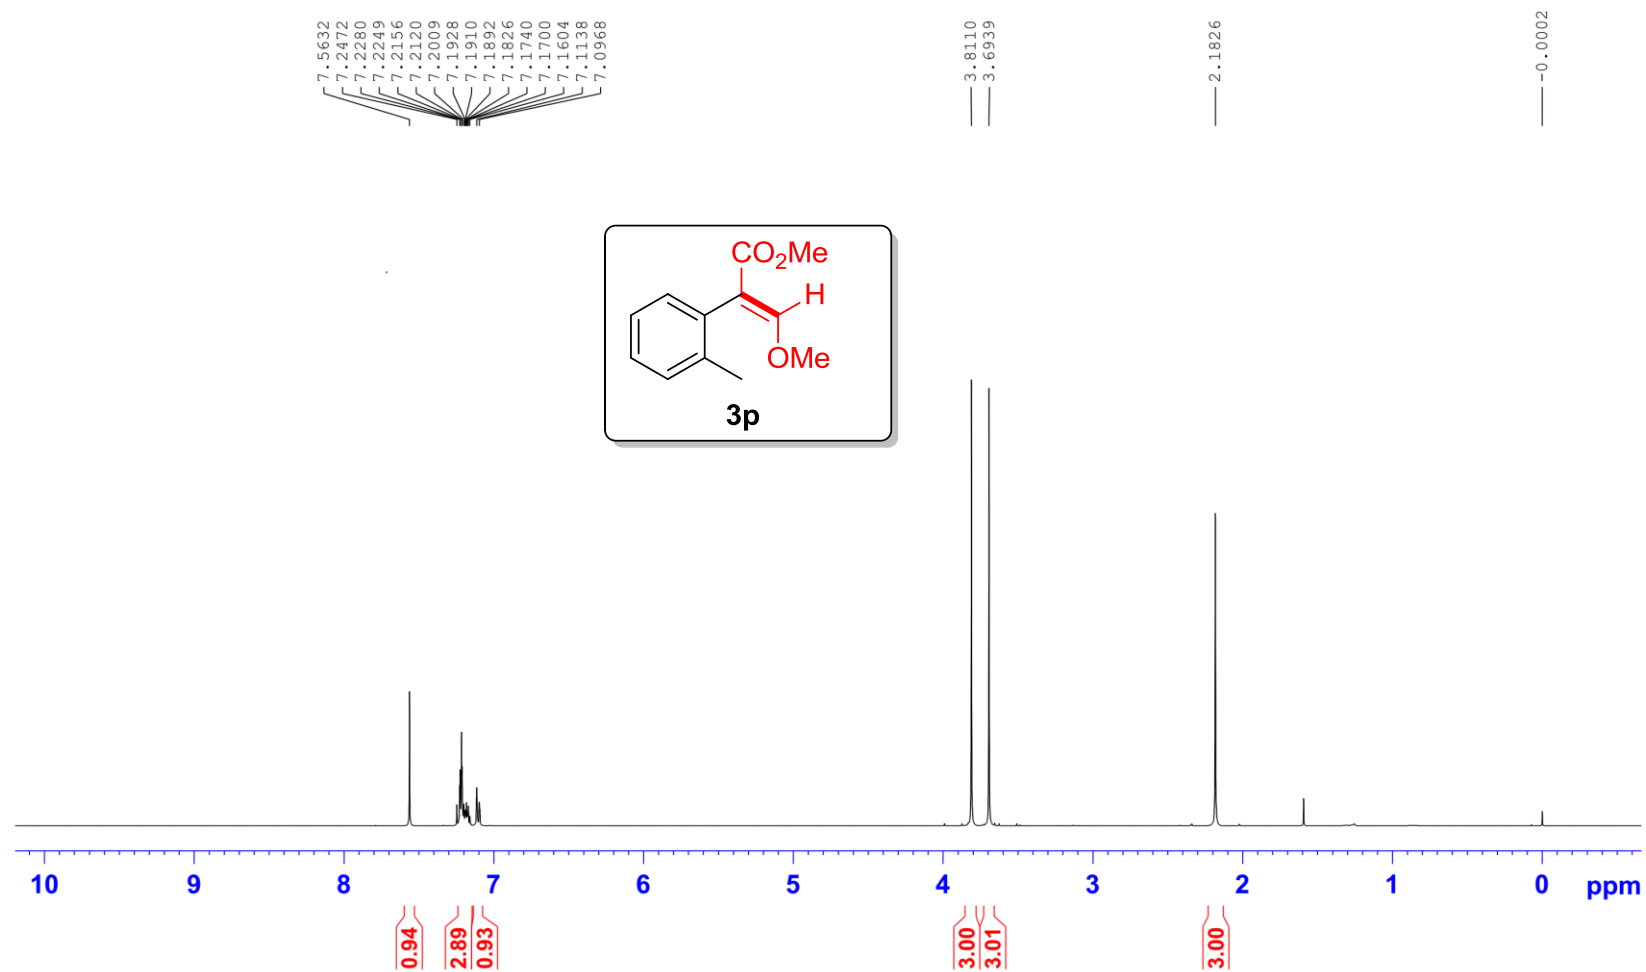

LJW-X180523-9-CNMR

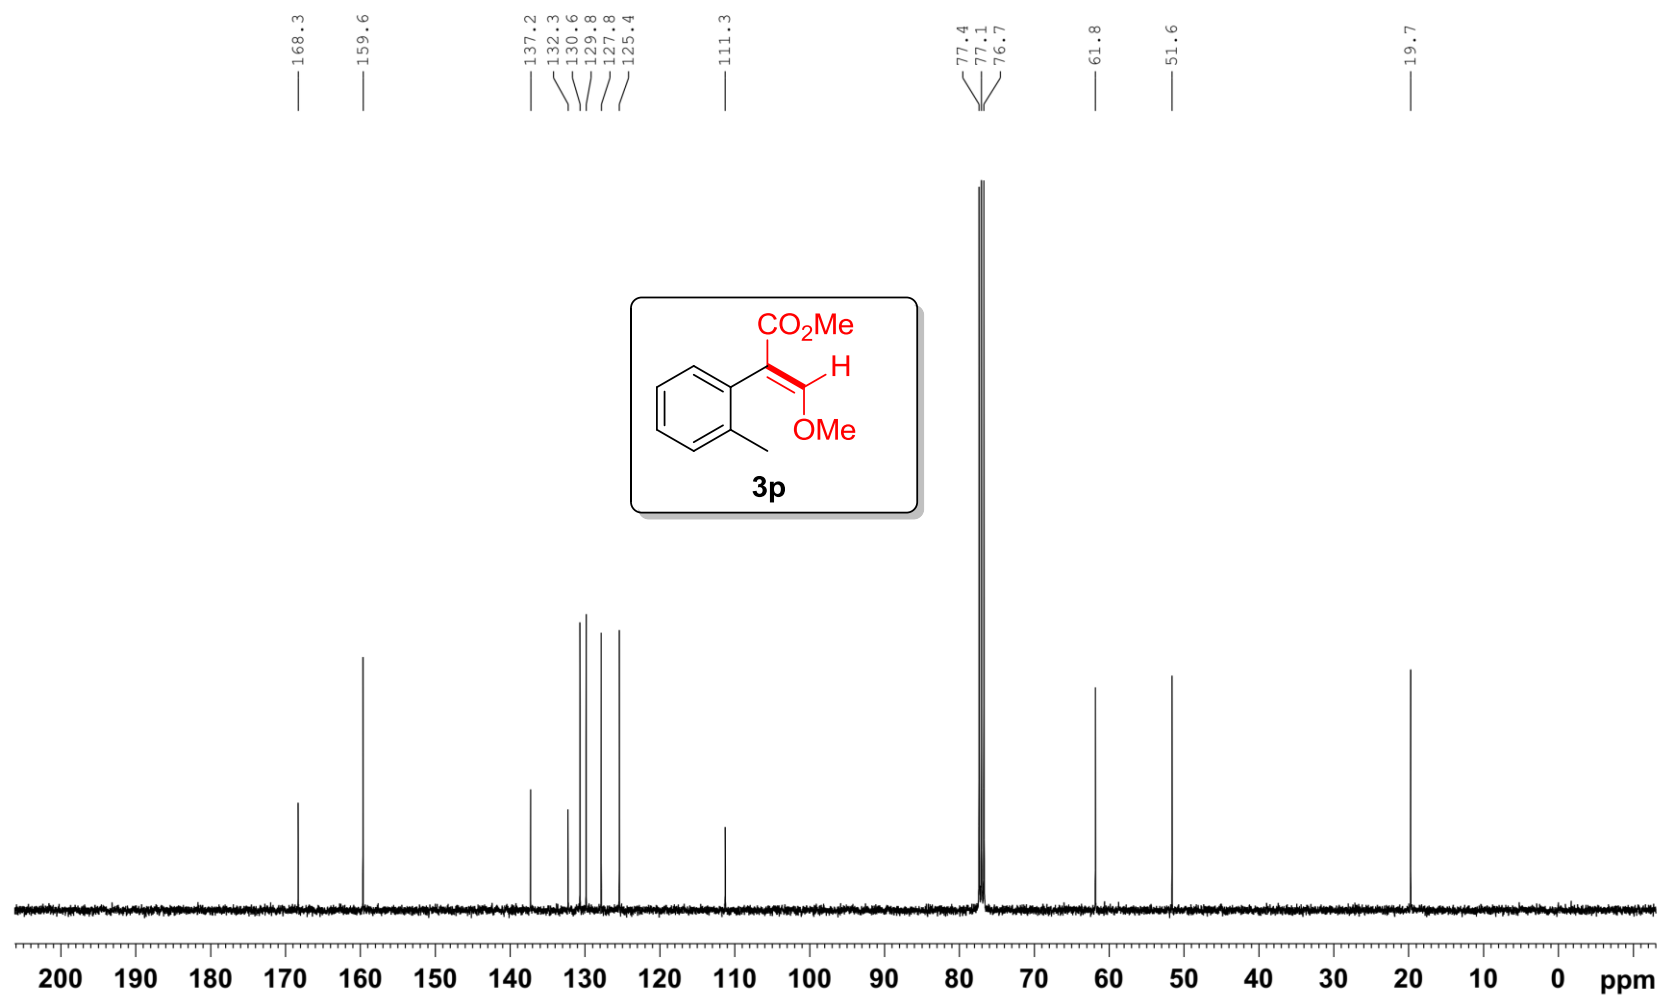

LJW-X180507-1-HNMR

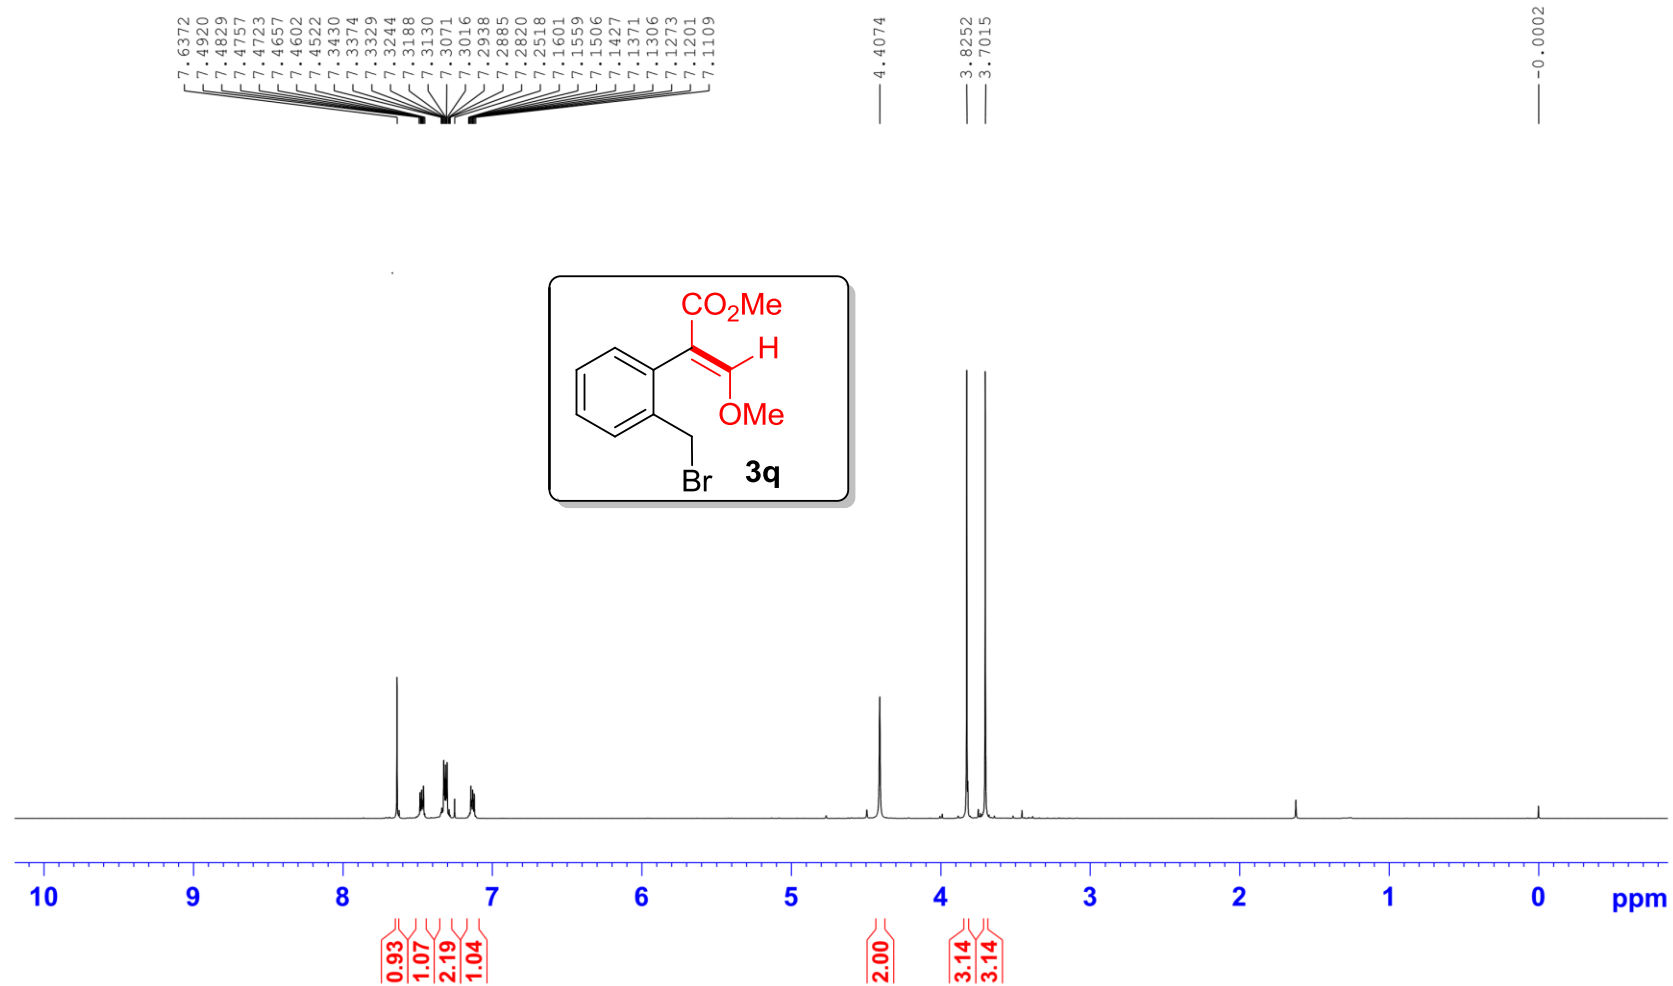

LJW-X180507-1-CNMR

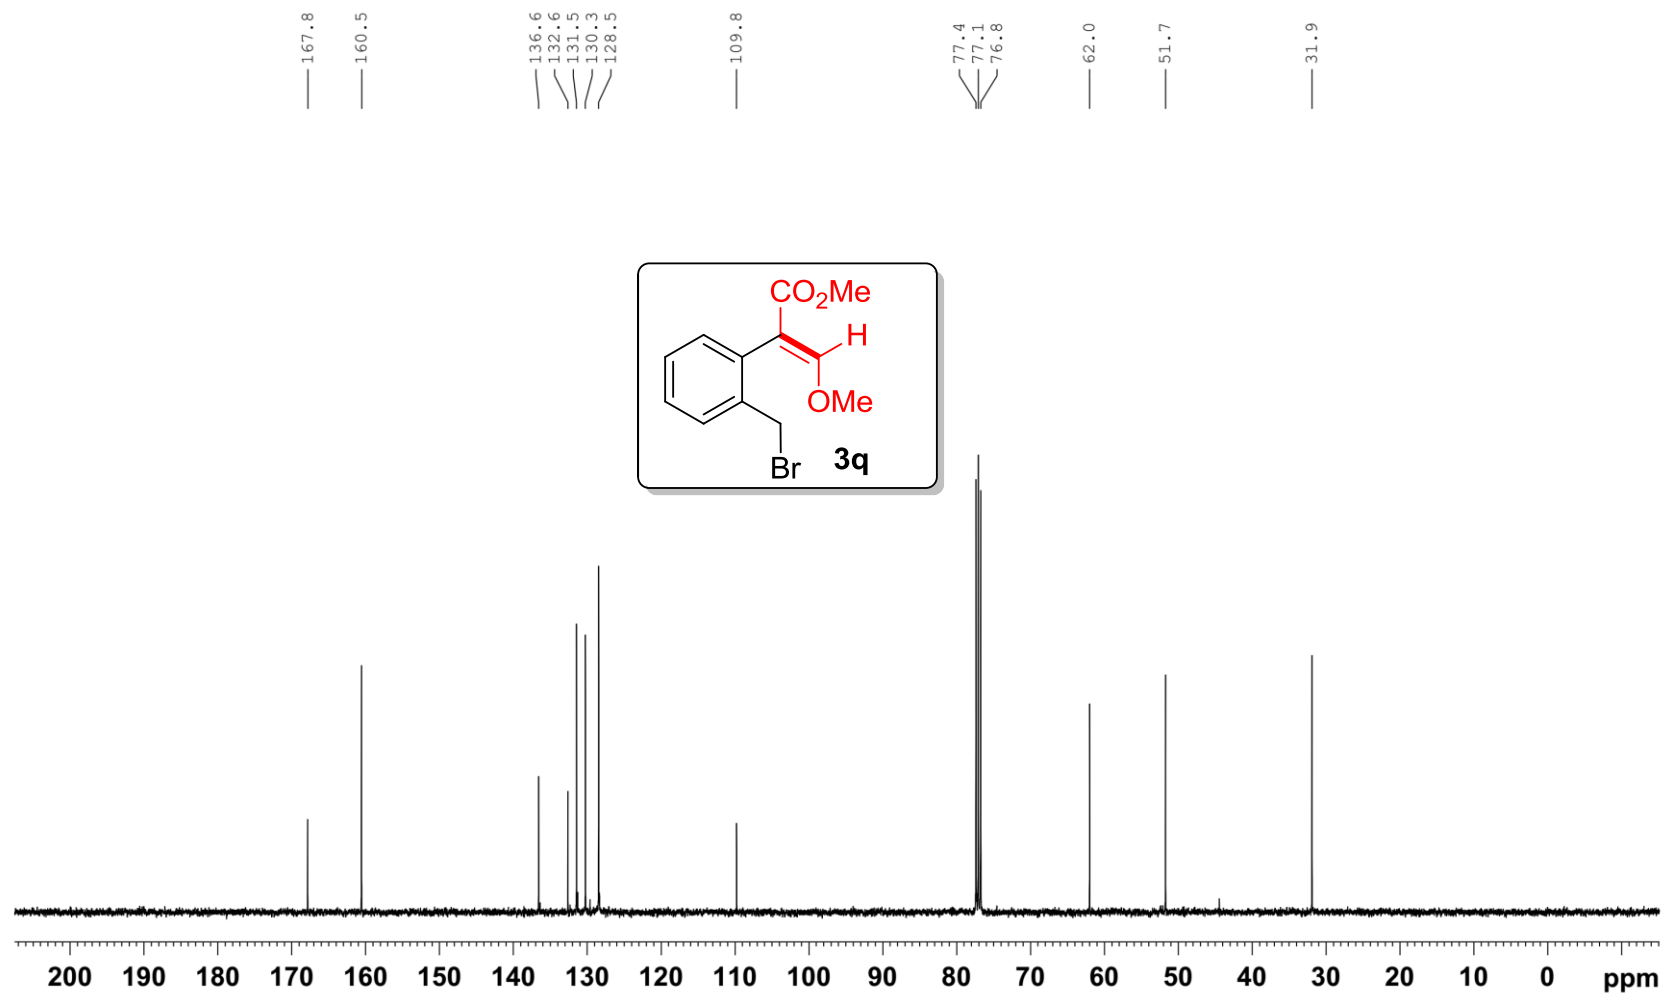

LJW-X180923-1-HNMR

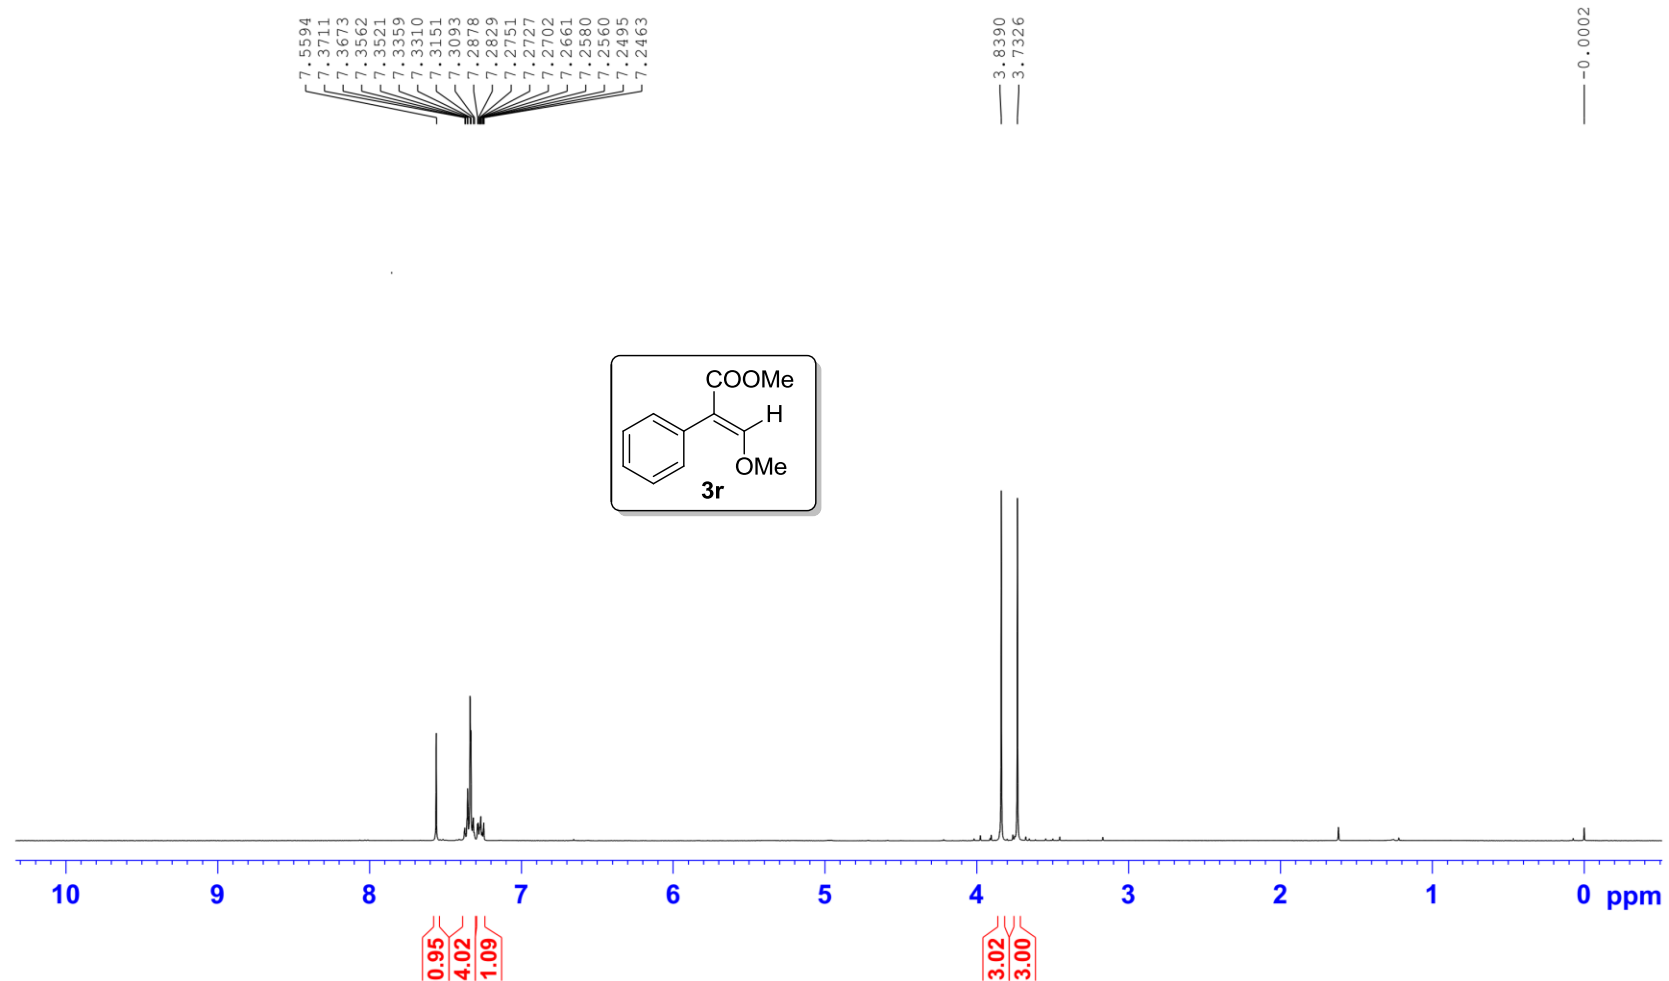

LJW-X180923-1-CNMR

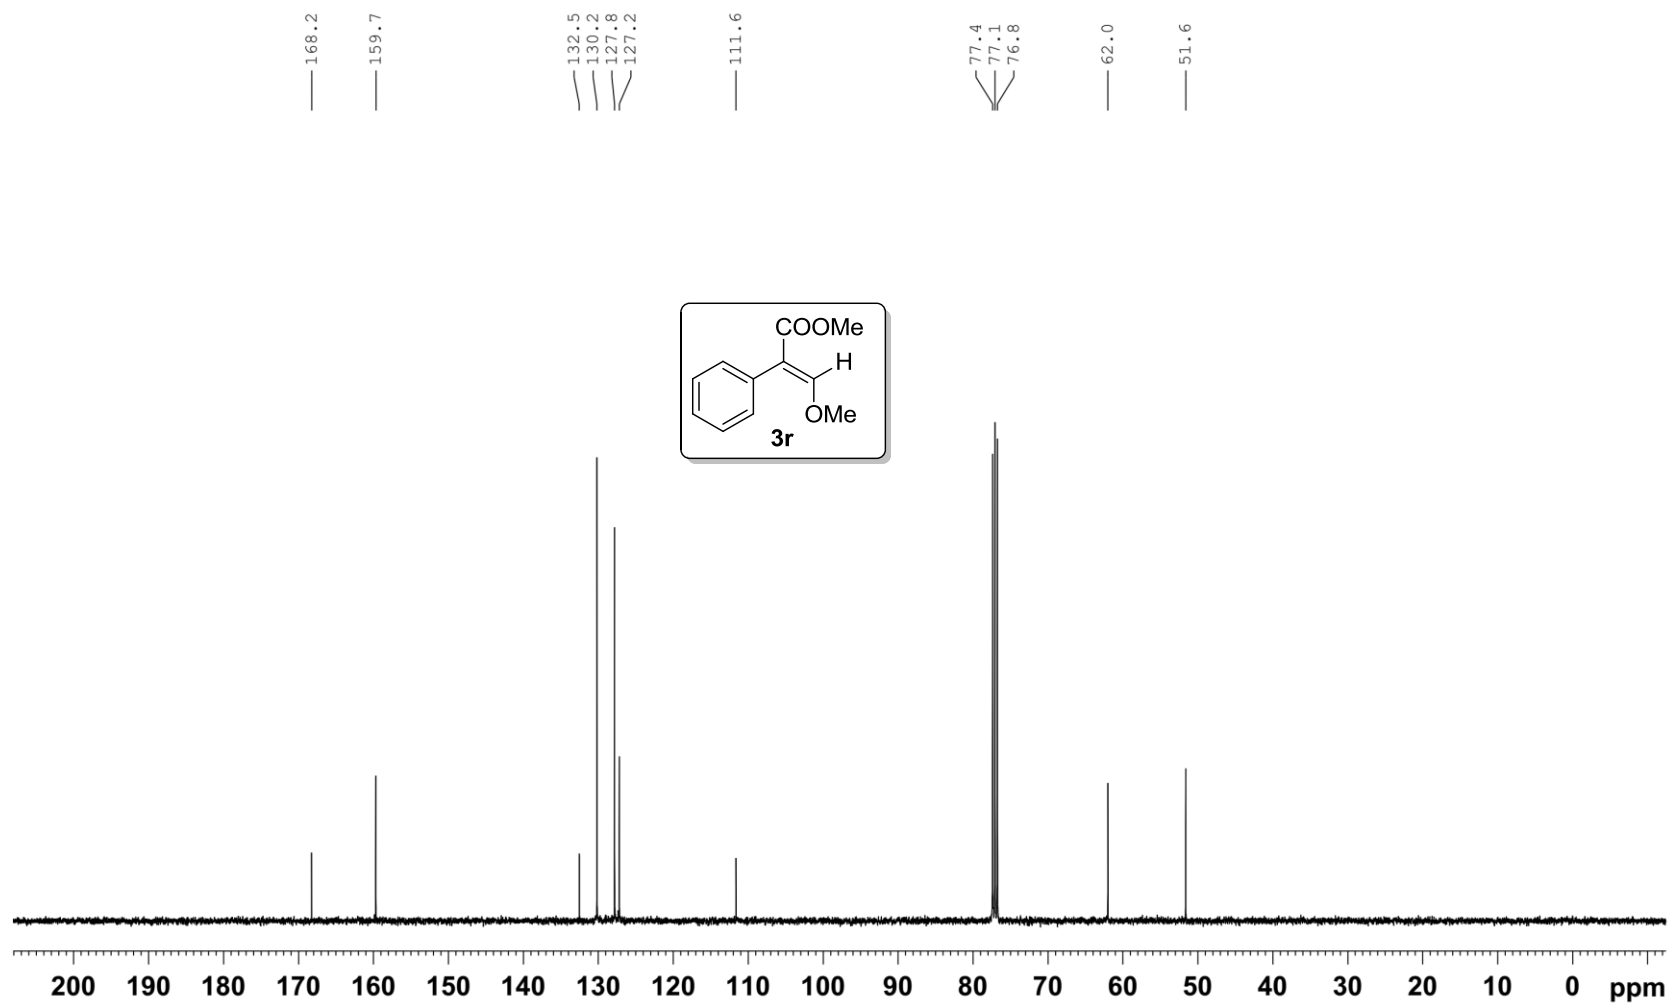

LJW-X180923-2-HNMR

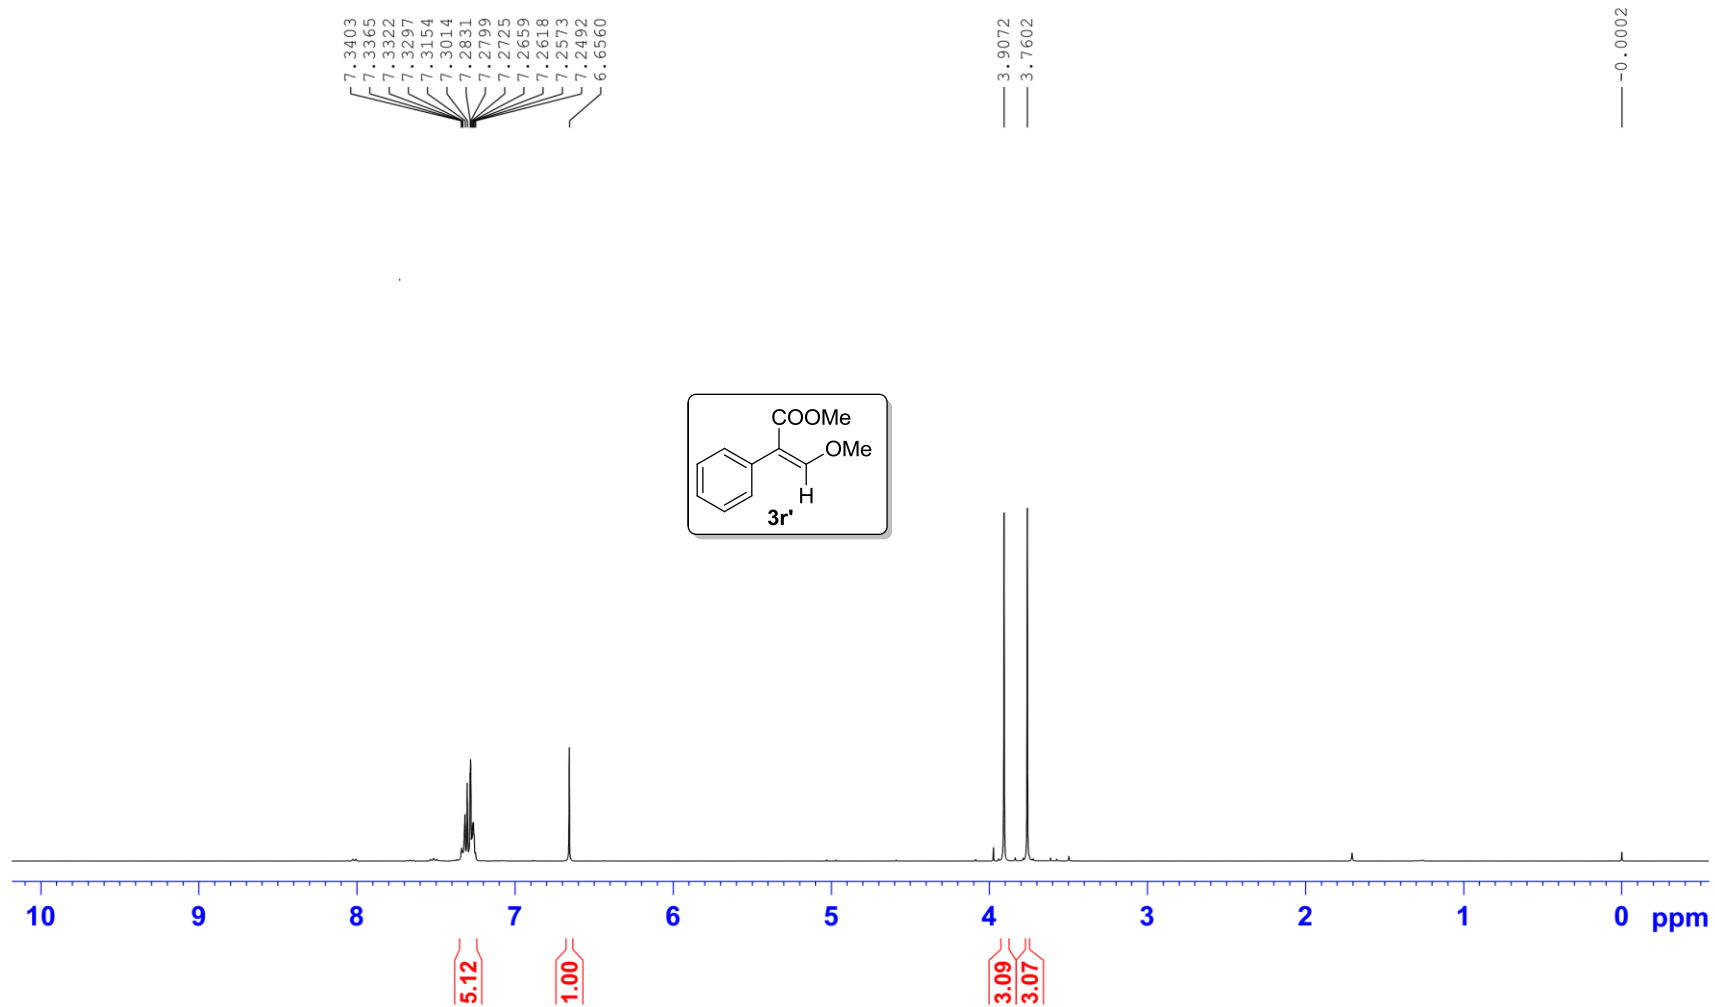

LJW-X180923-2-CNMR

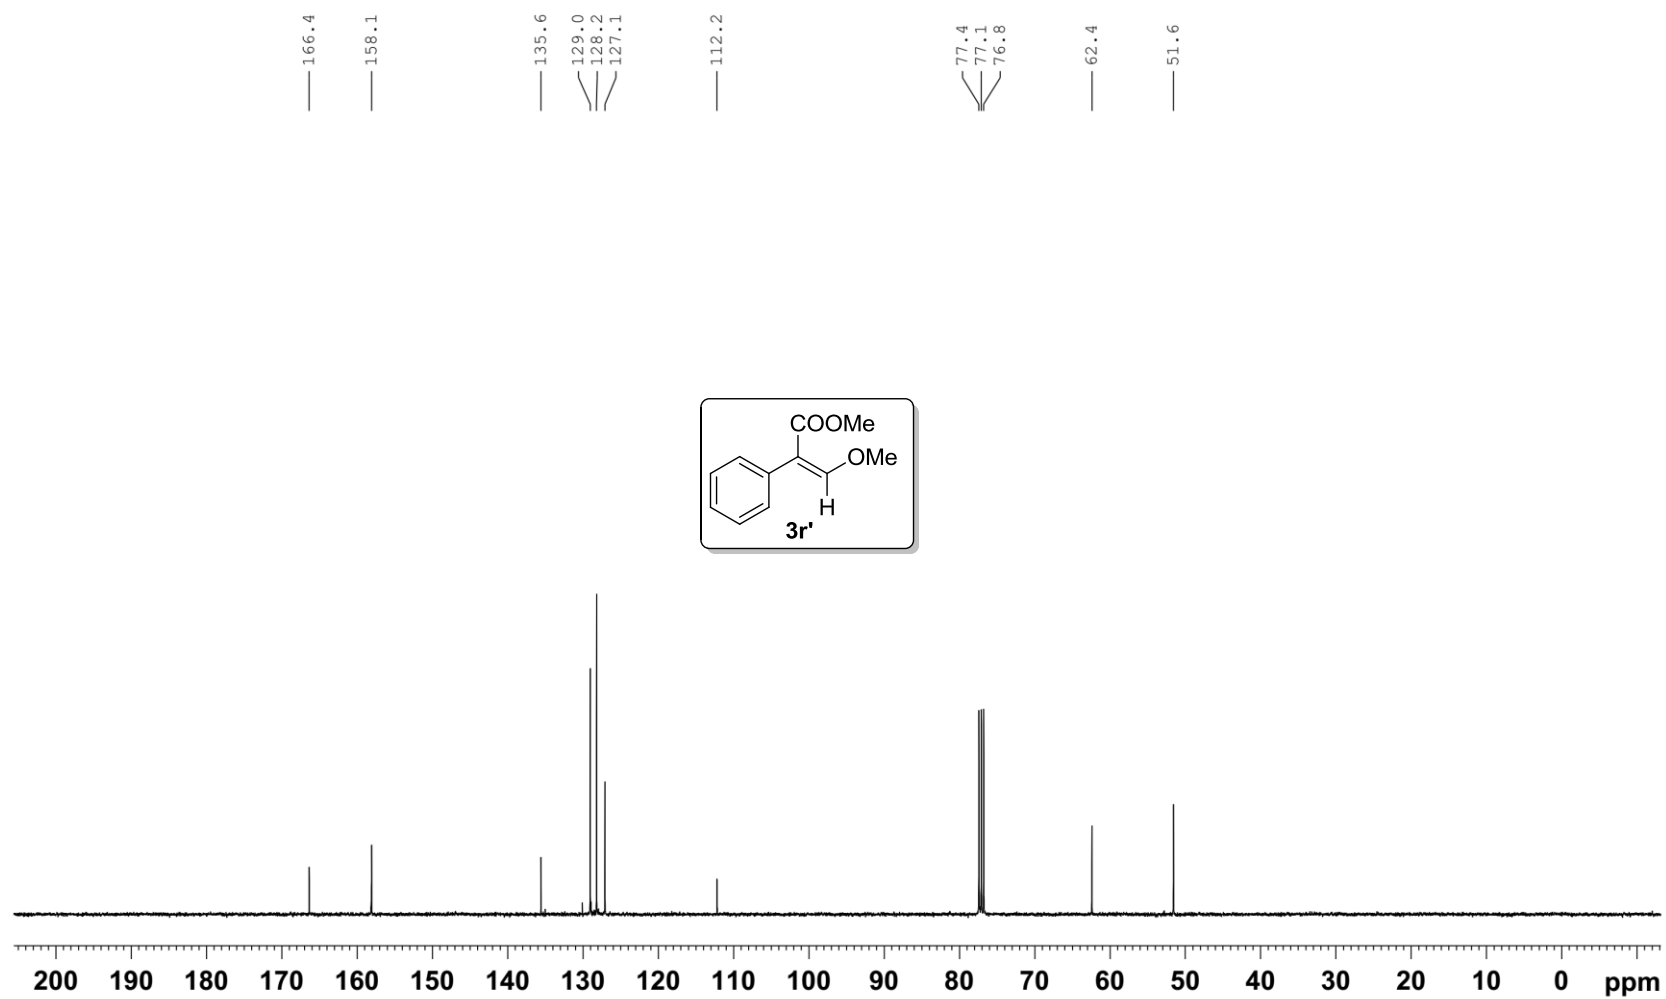

LJW-X180910-2HNMR

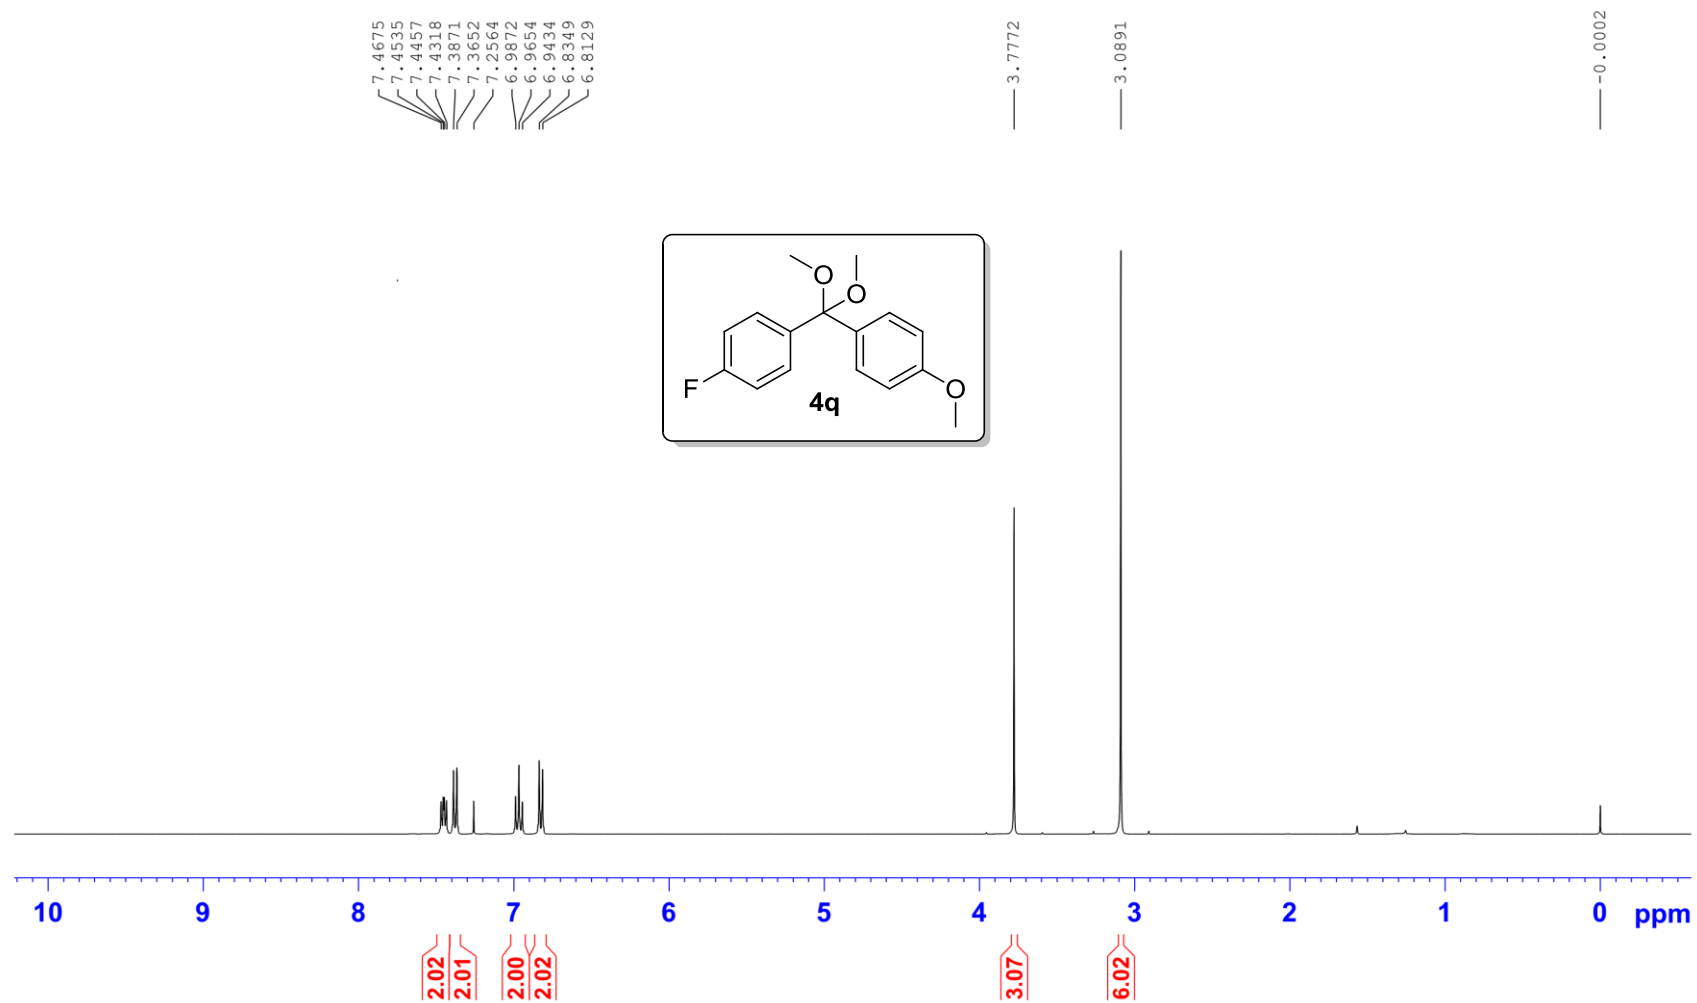

LJW-X180910-2CNMR

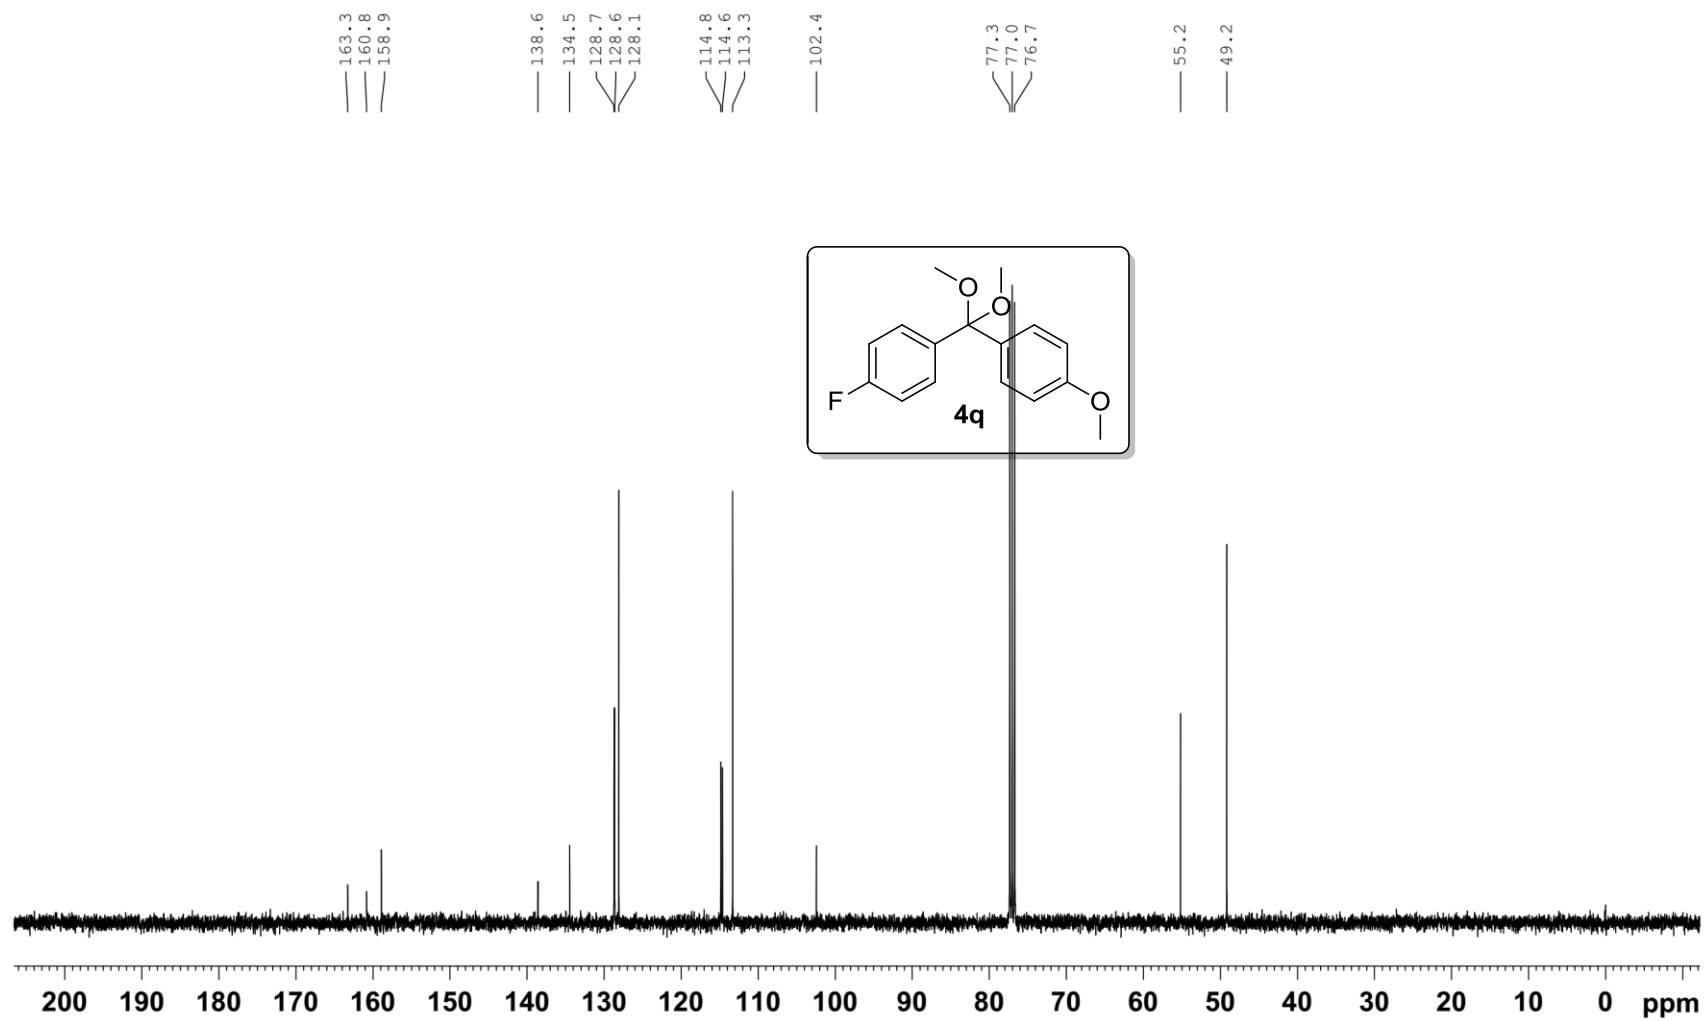

LJW-X180910-2FNMR

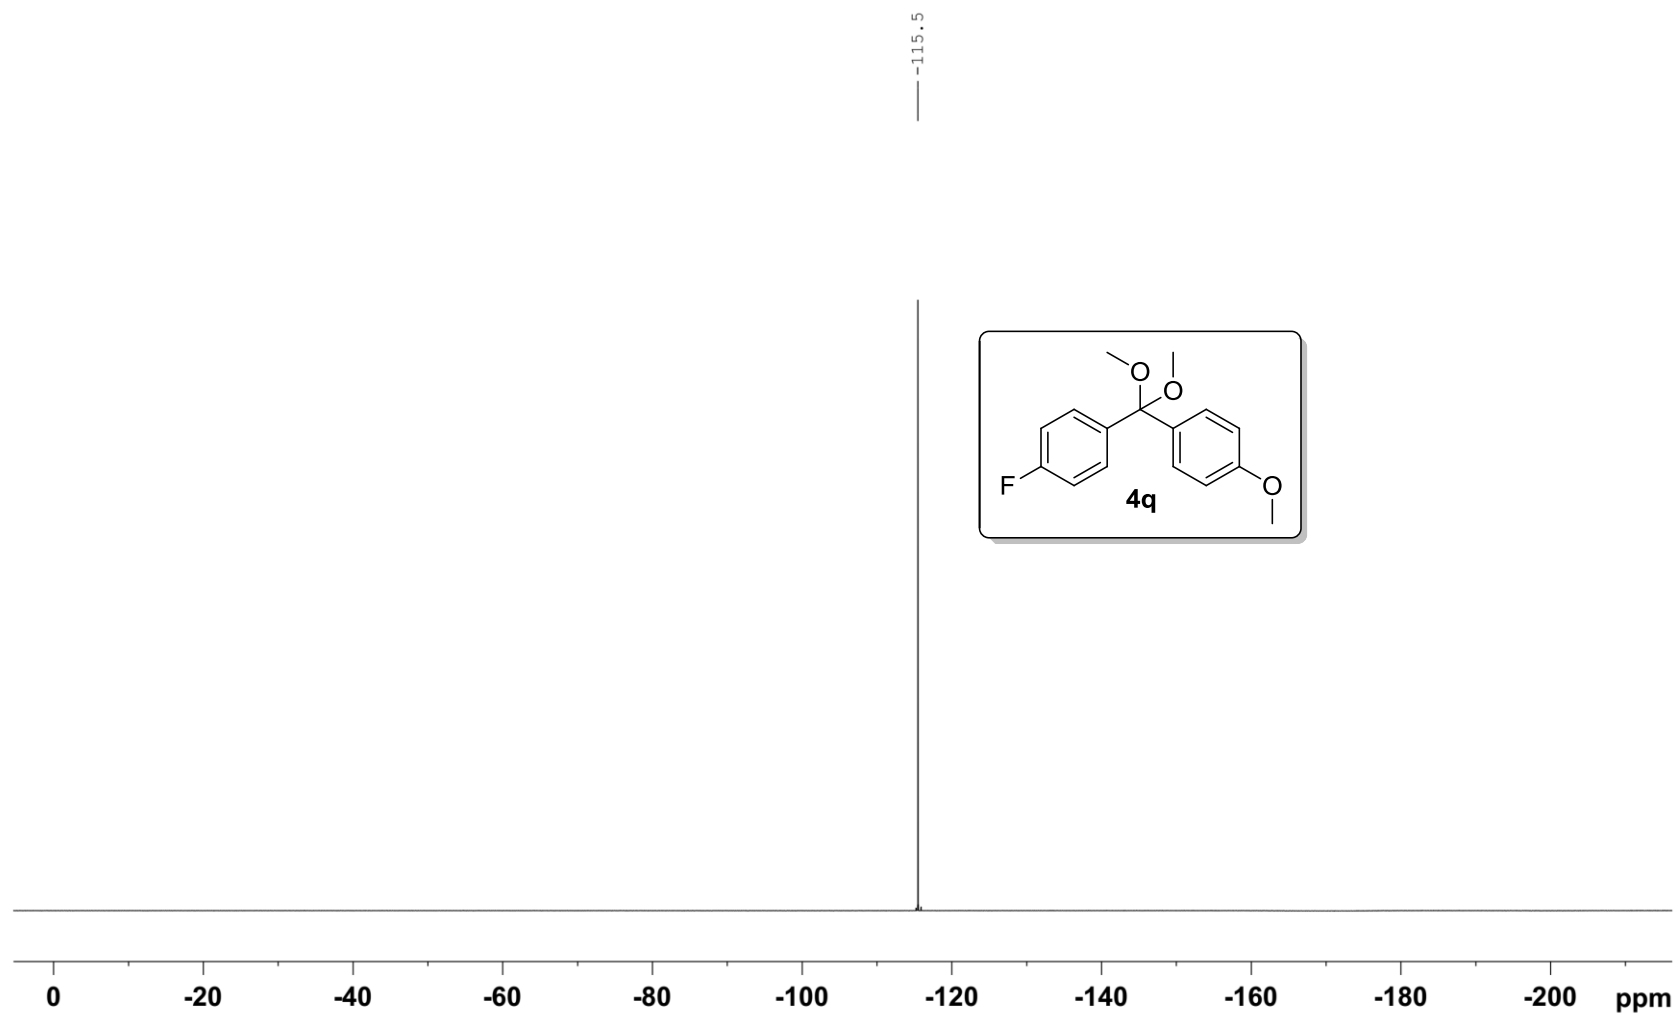

LJW-X170522-8-HNMR

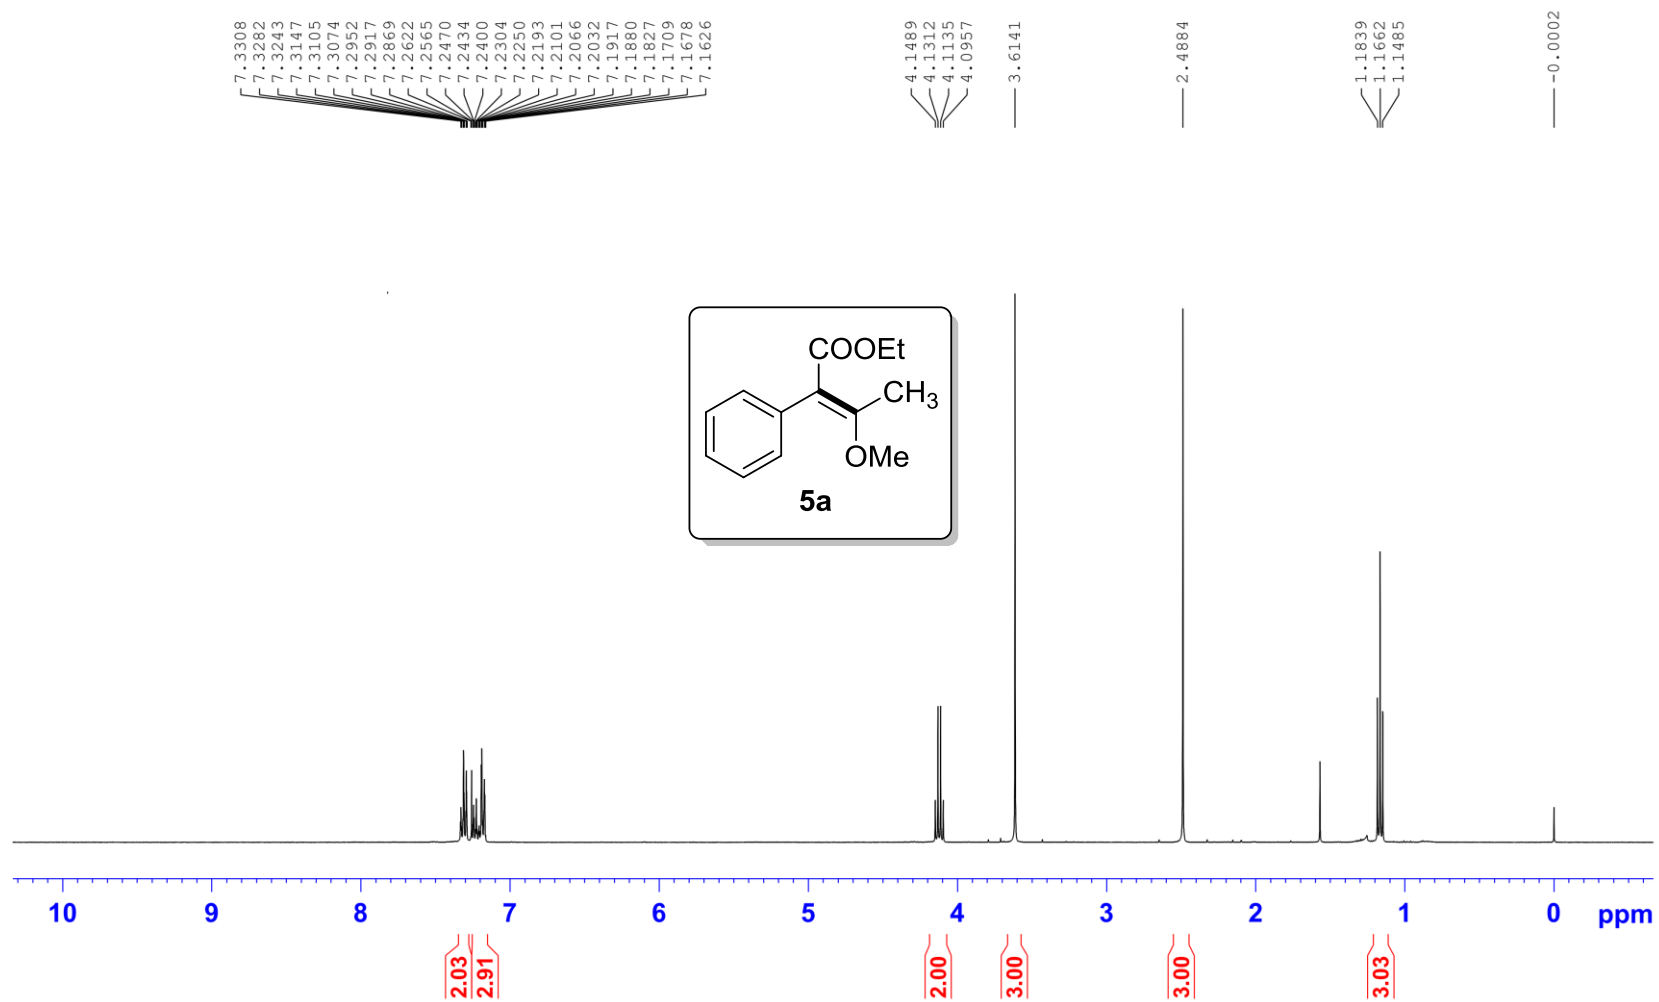

LJW-X170522-8-CNMR

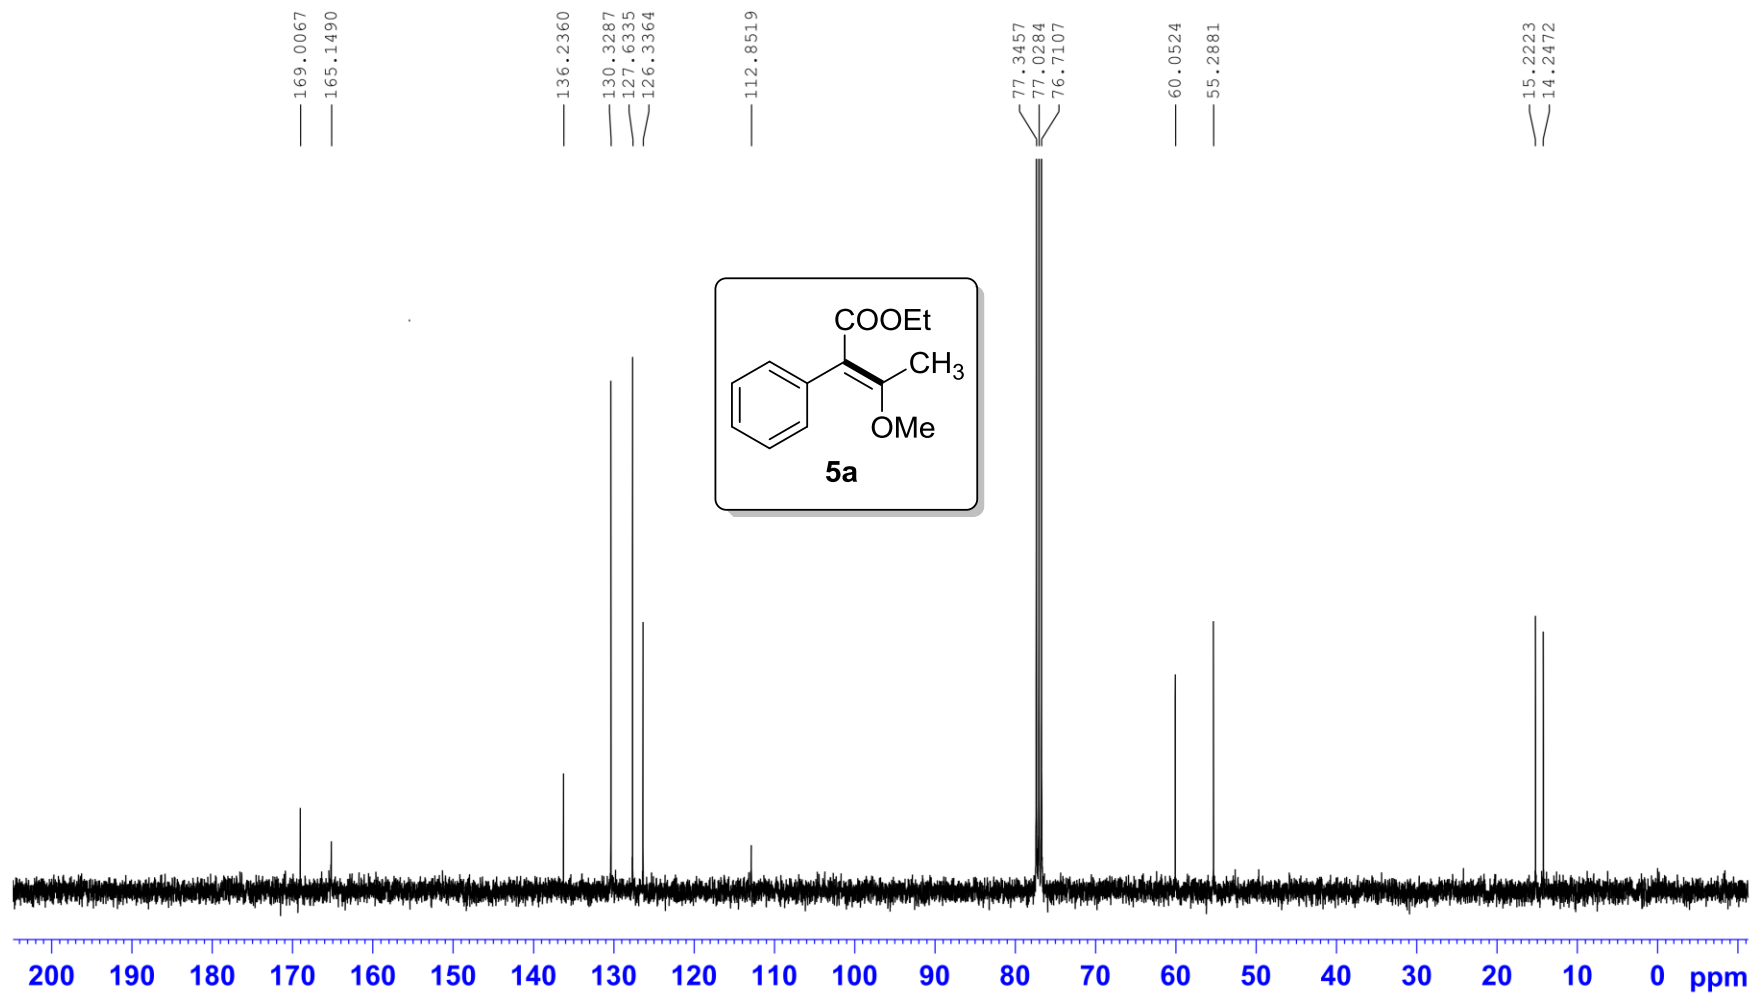

LJW-X170703-9-HNMR

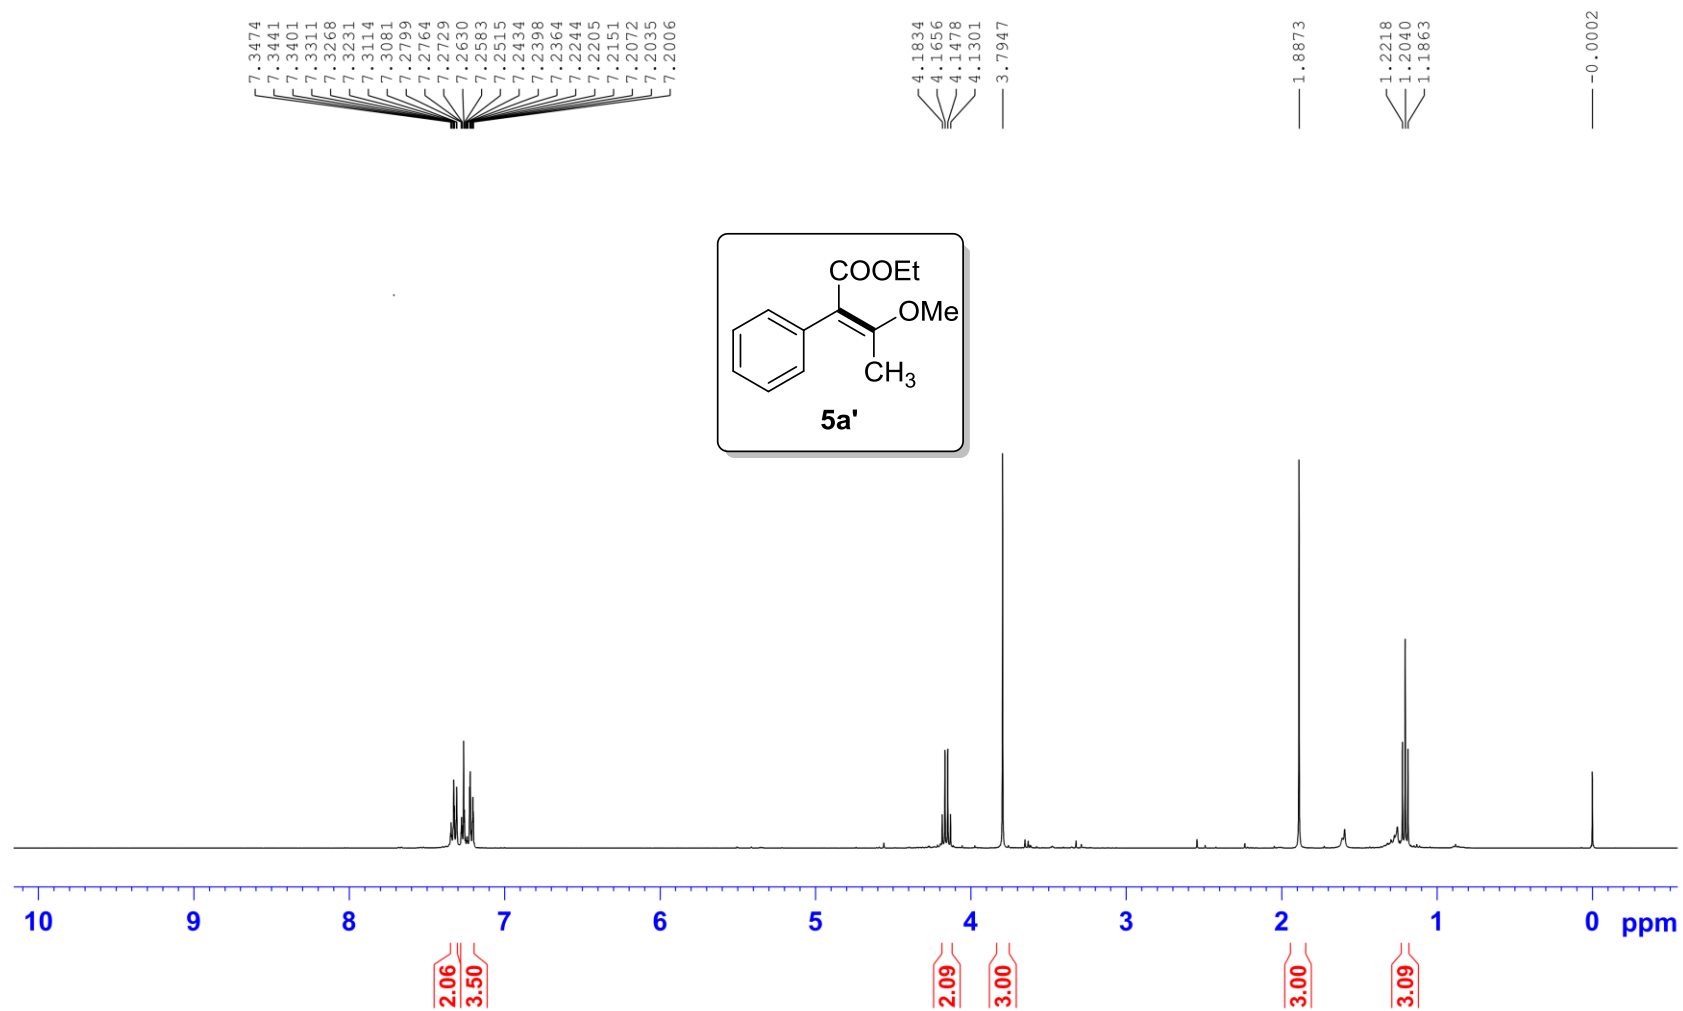

LJW-X170703-9-CNMR

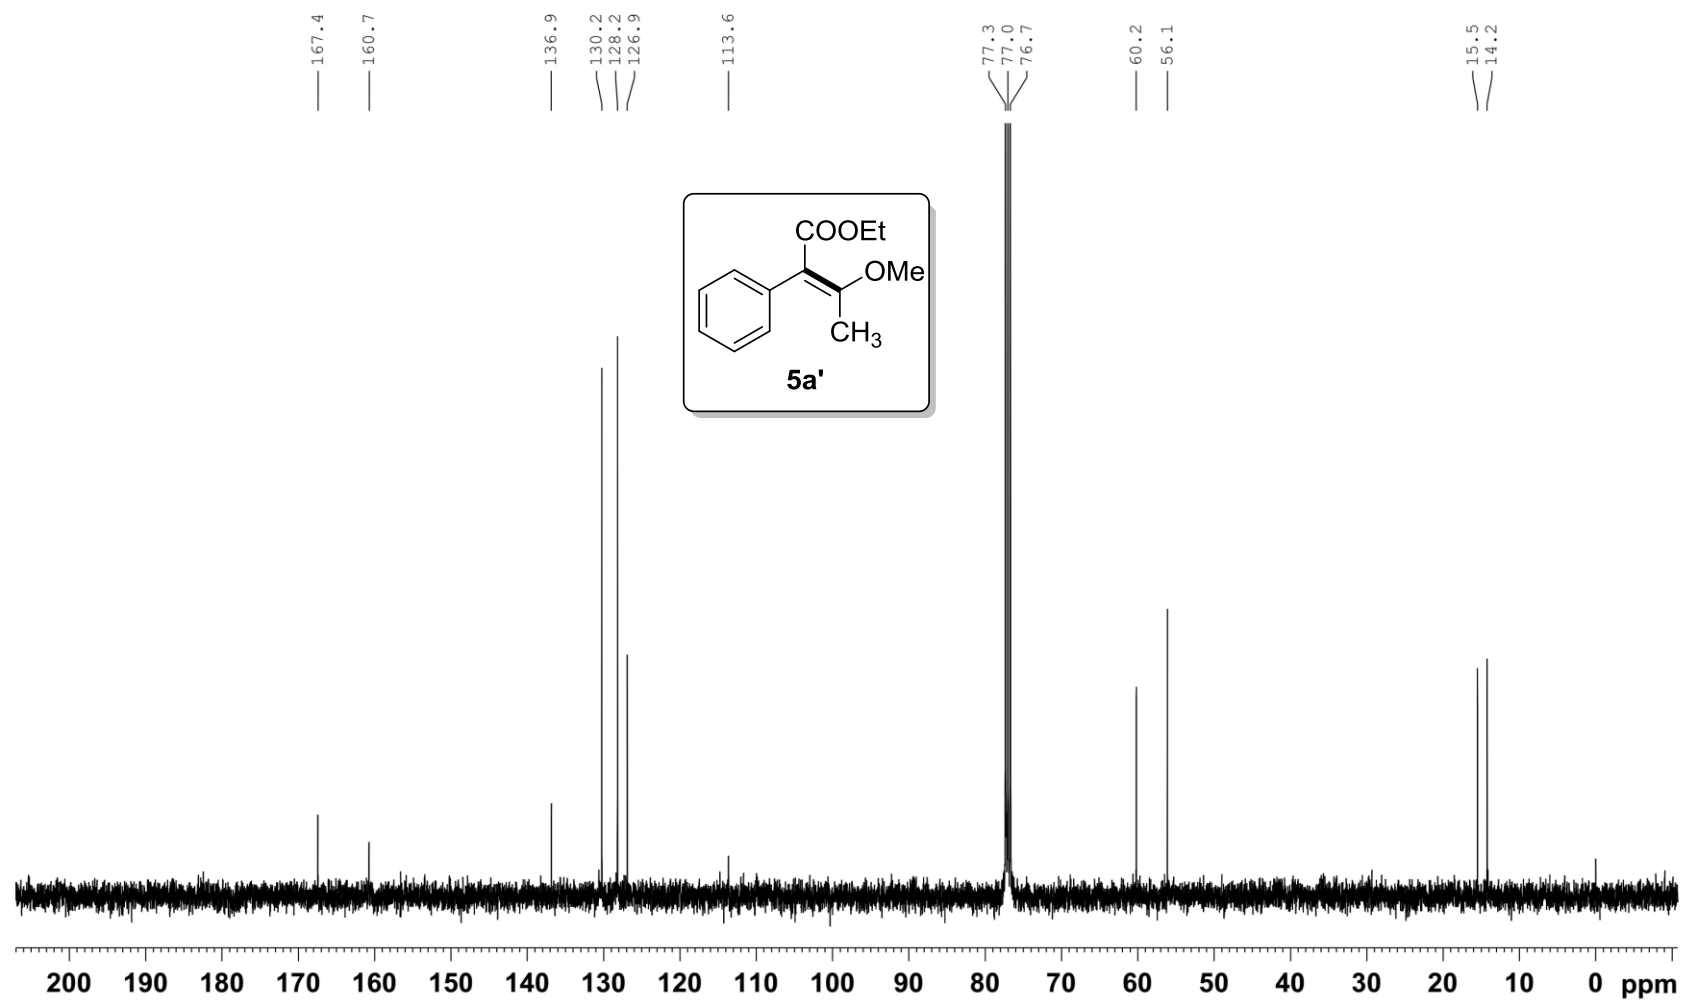

LJW-X170703-10-HNMR

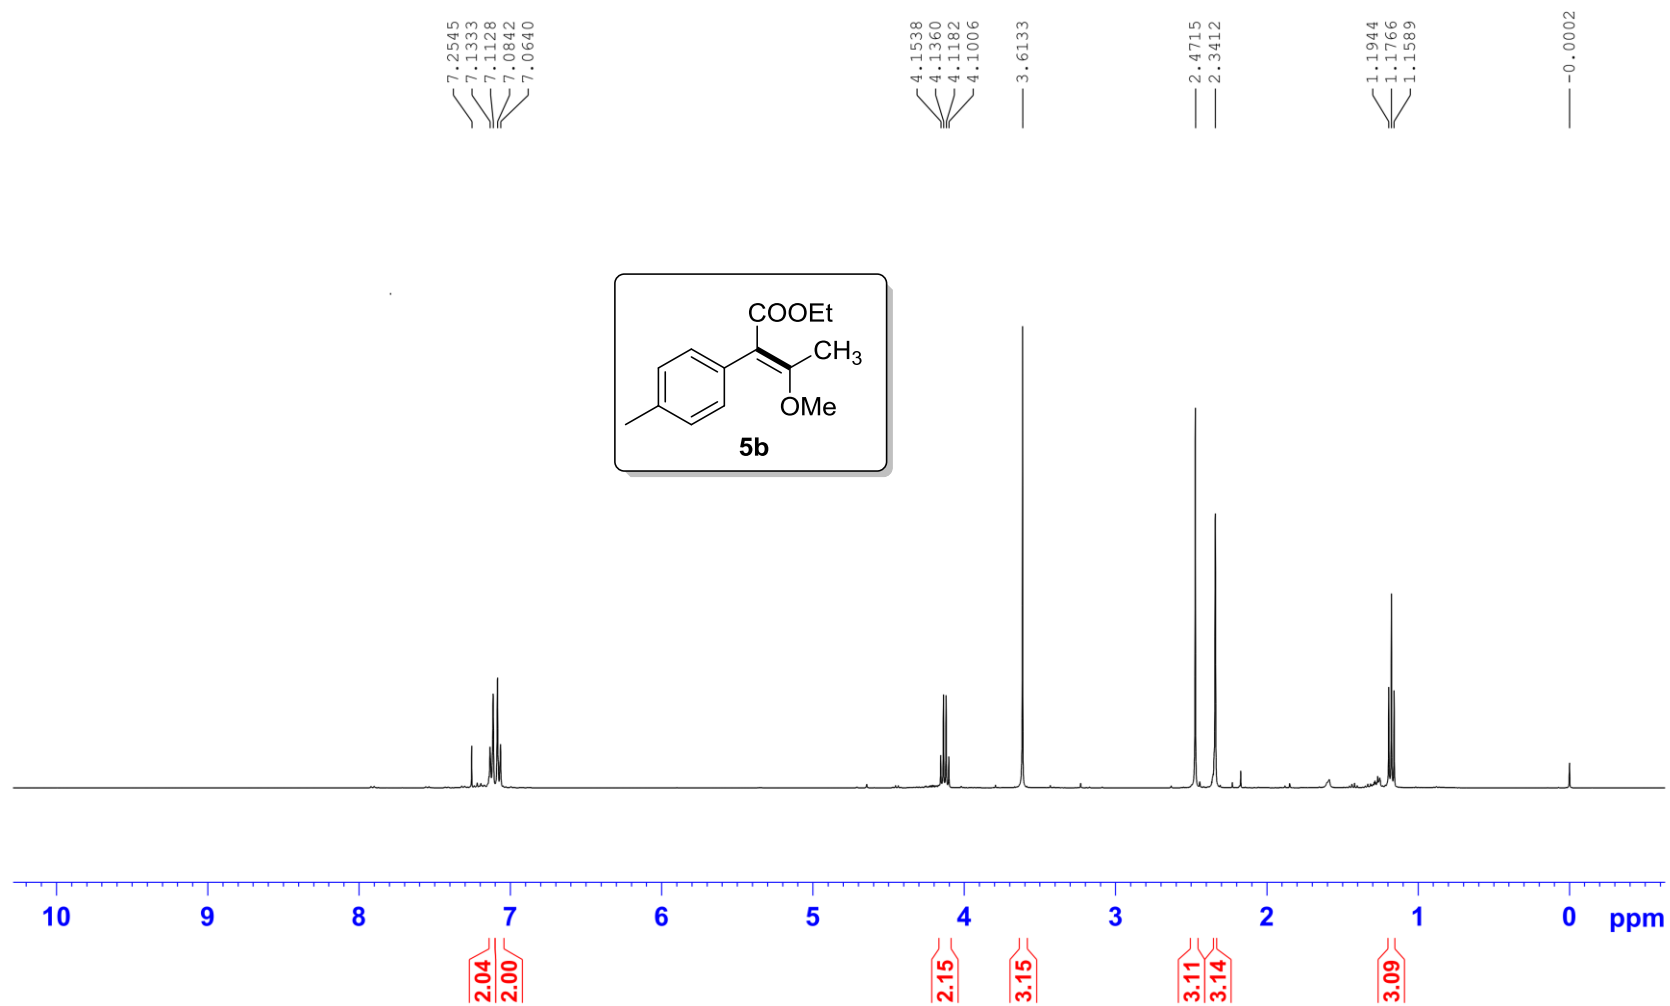

LJW-X170703-10-CNMR

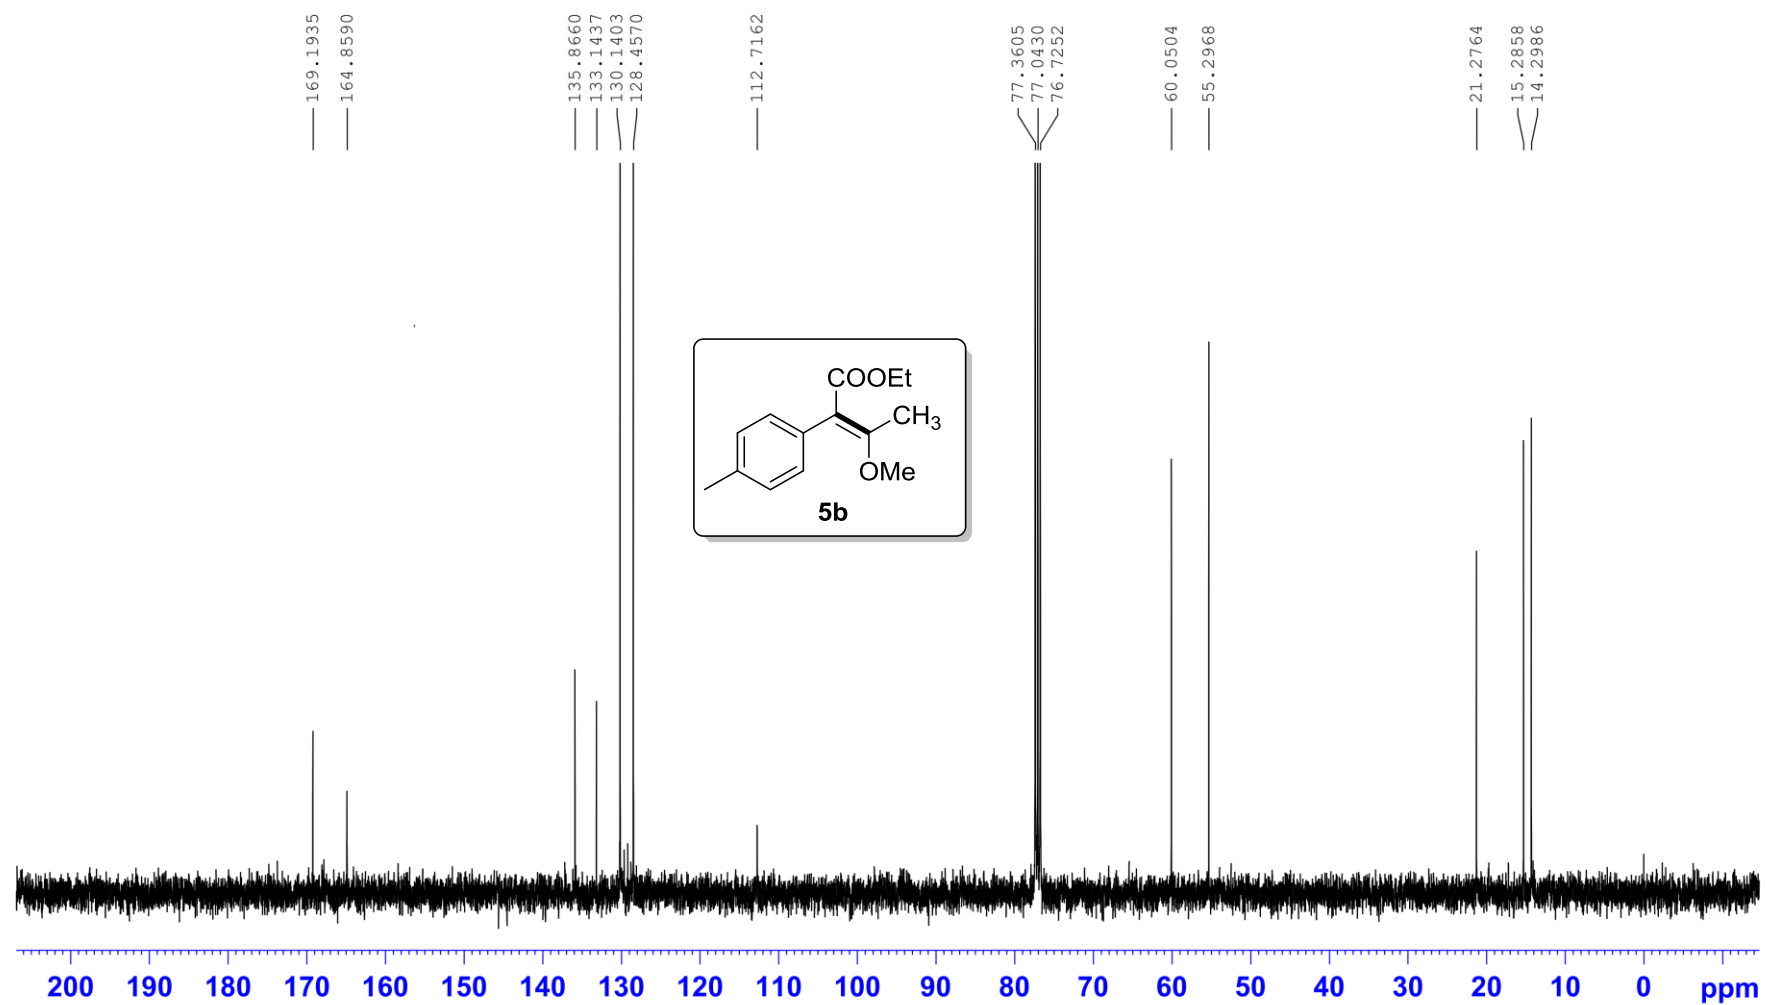

LJW-X170705-2-HNMR

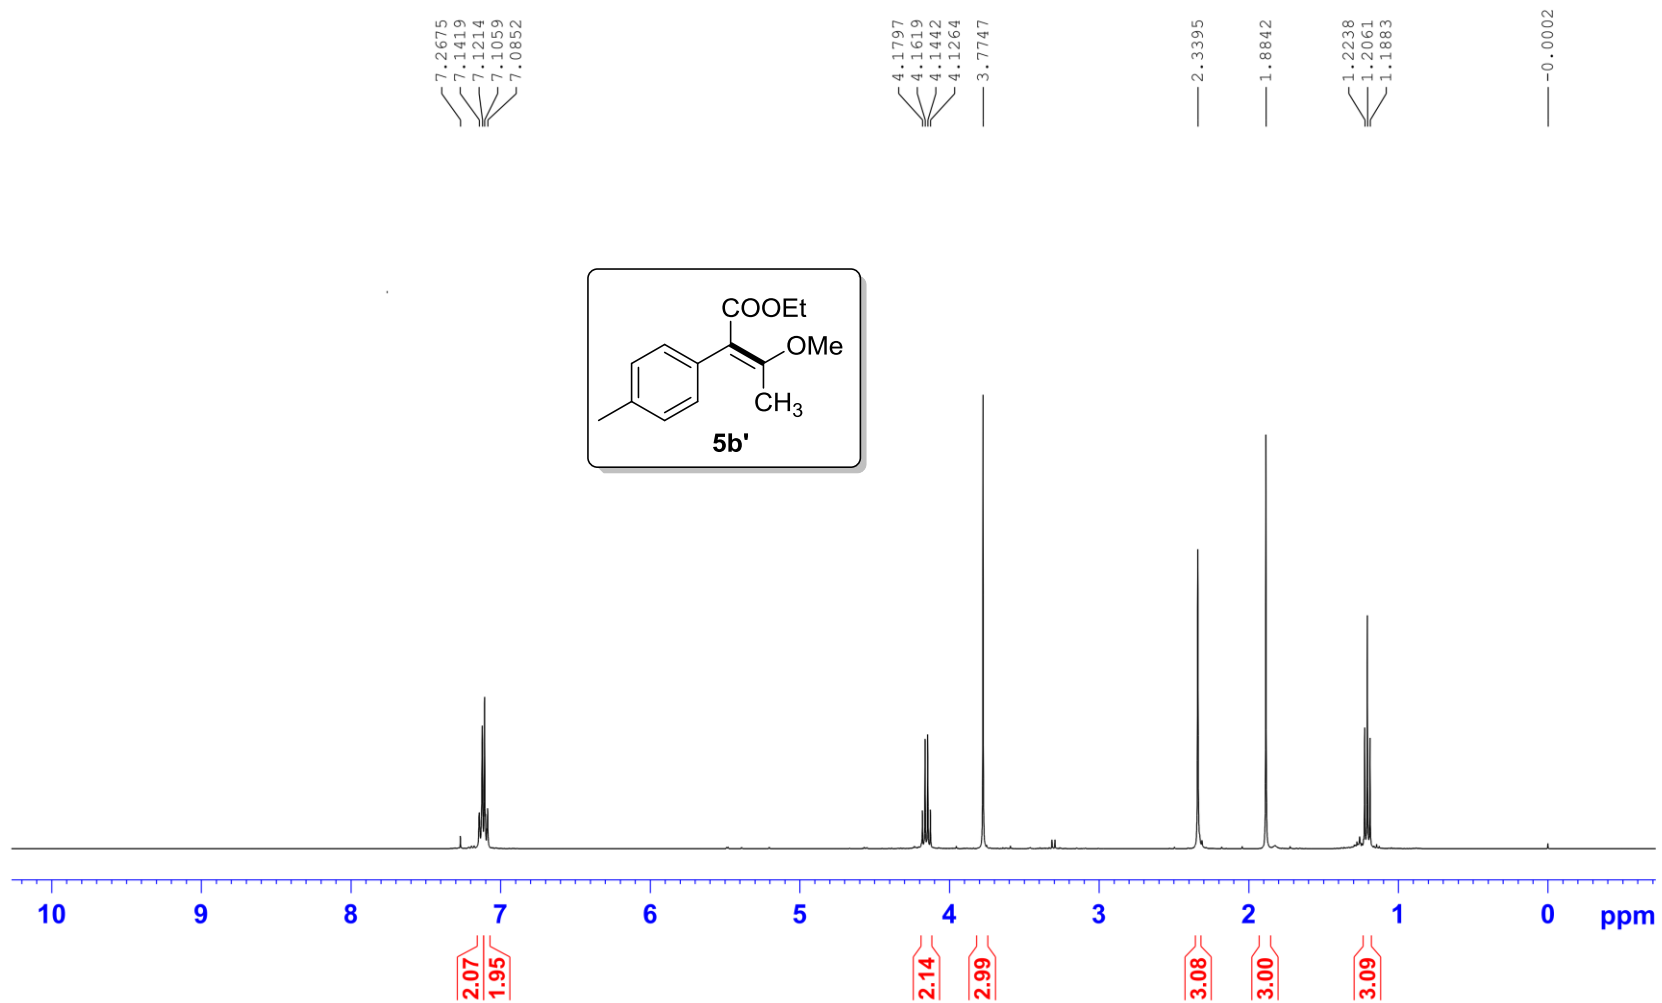

LJW-X170705-2-CNMR

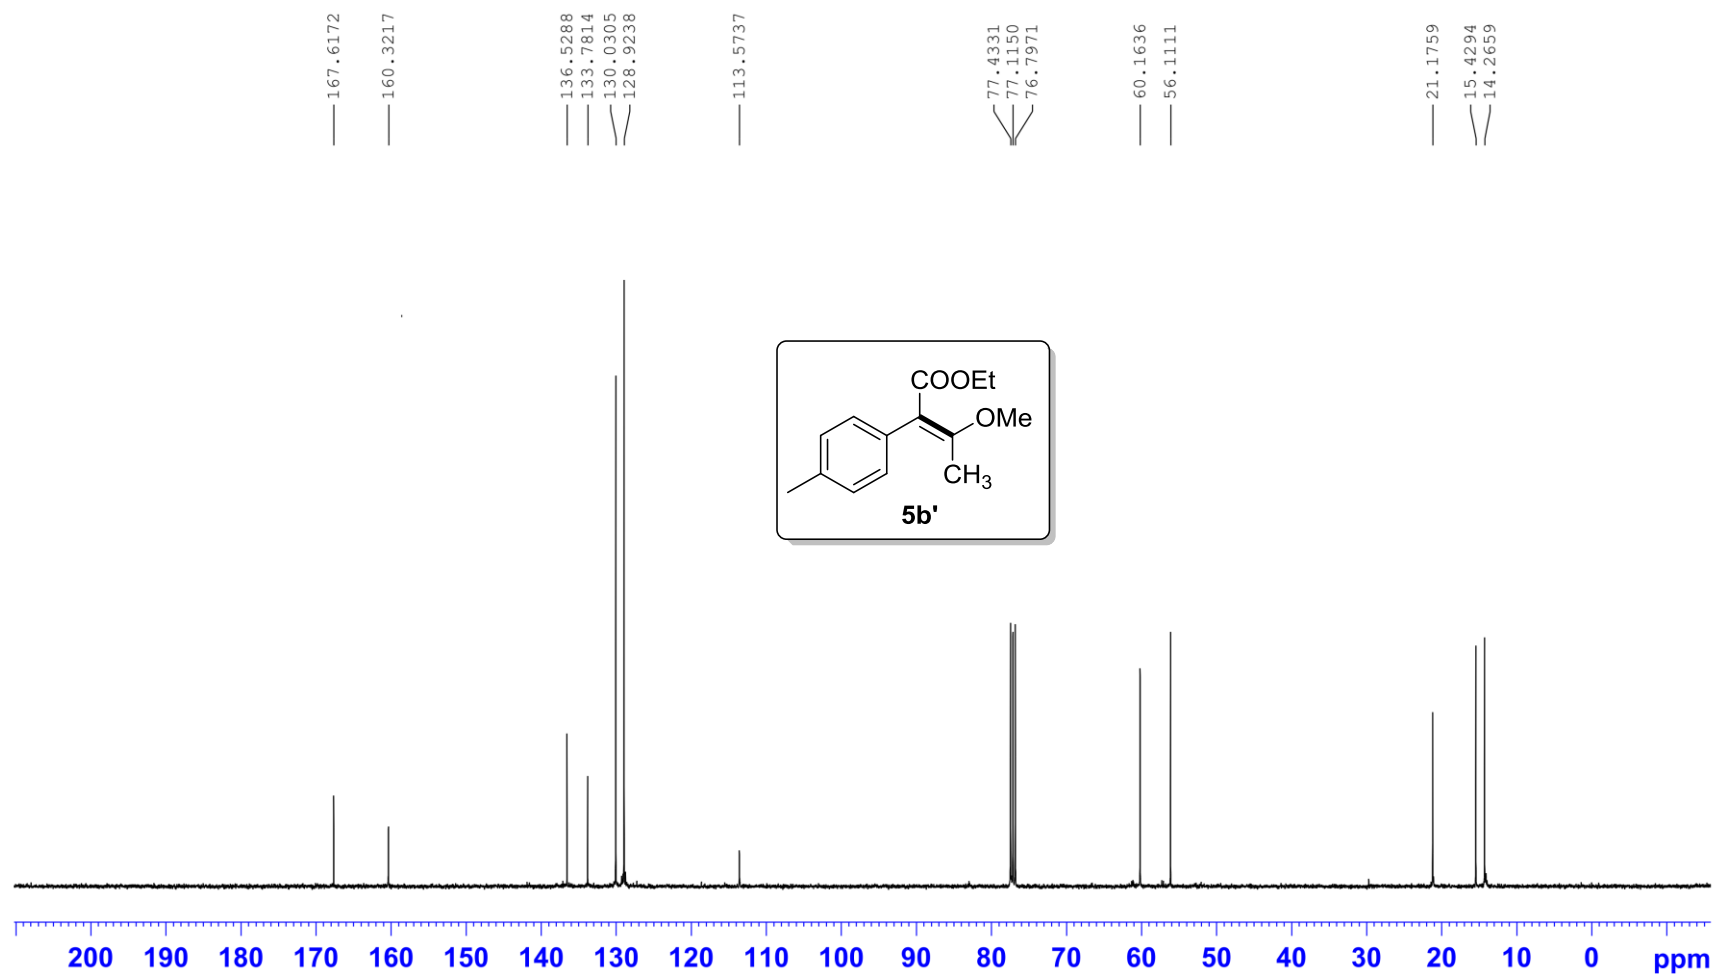

LJW-X180531-4-HNMR

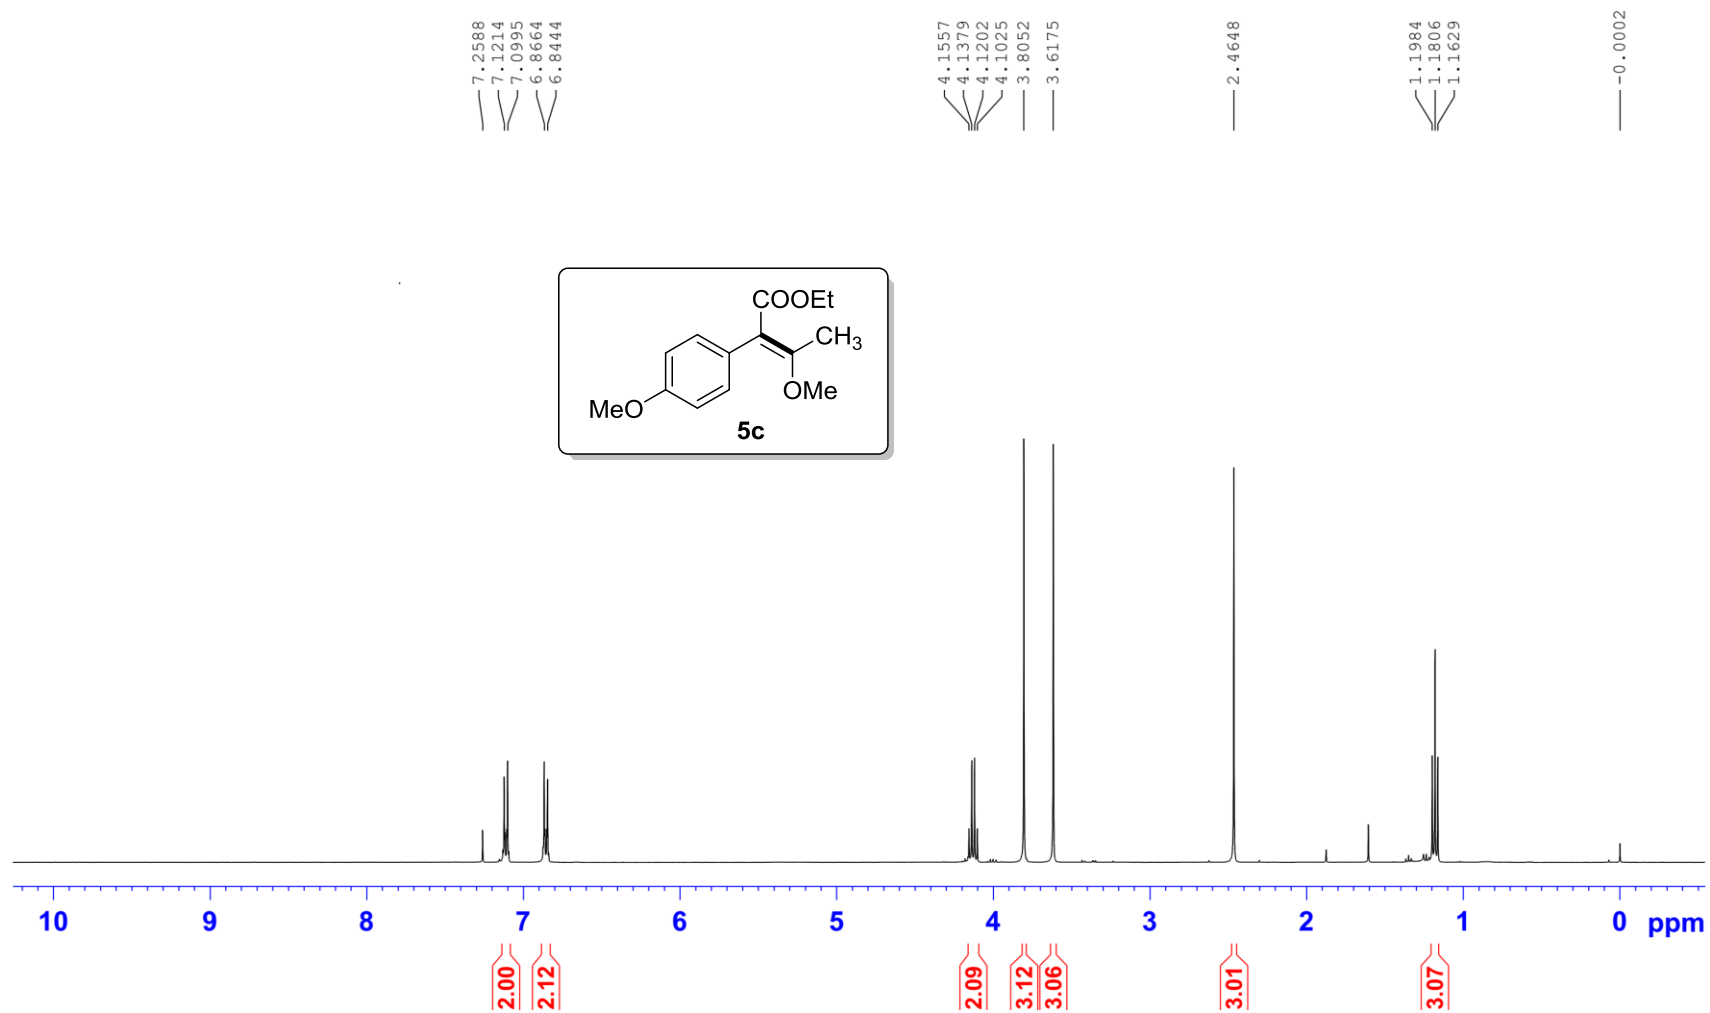

LJW-X180531-4-CNMR

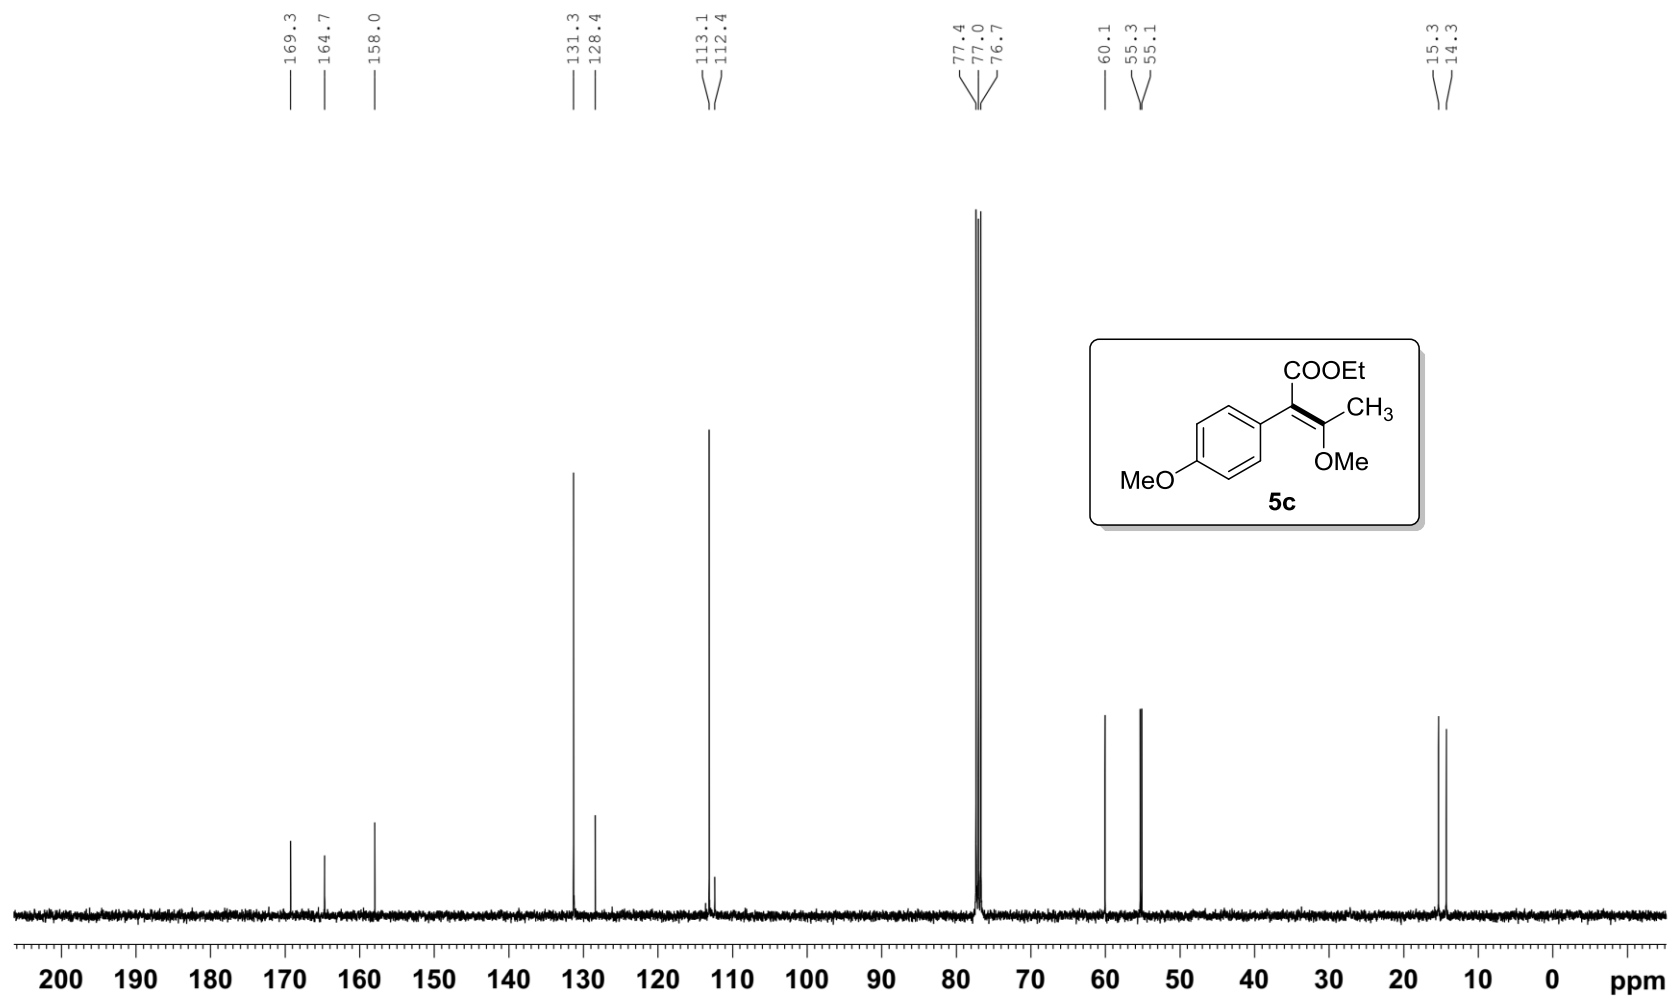

LJW-X170704-5-HNMR

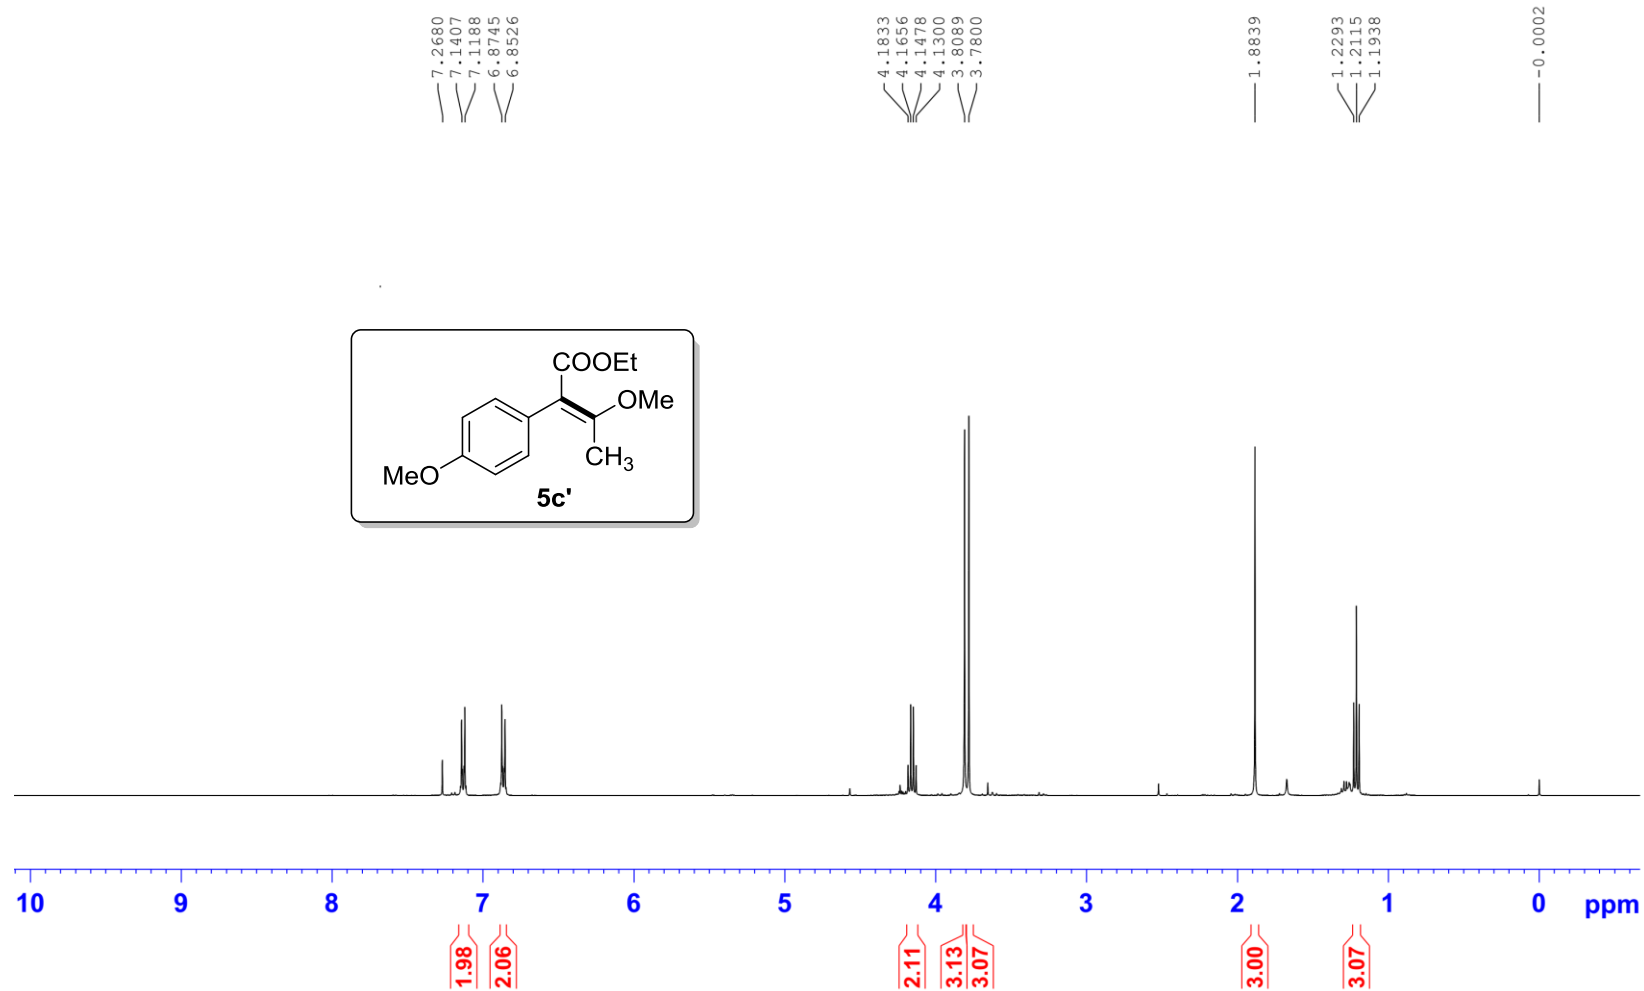

LJW-X170704-5-CNMR

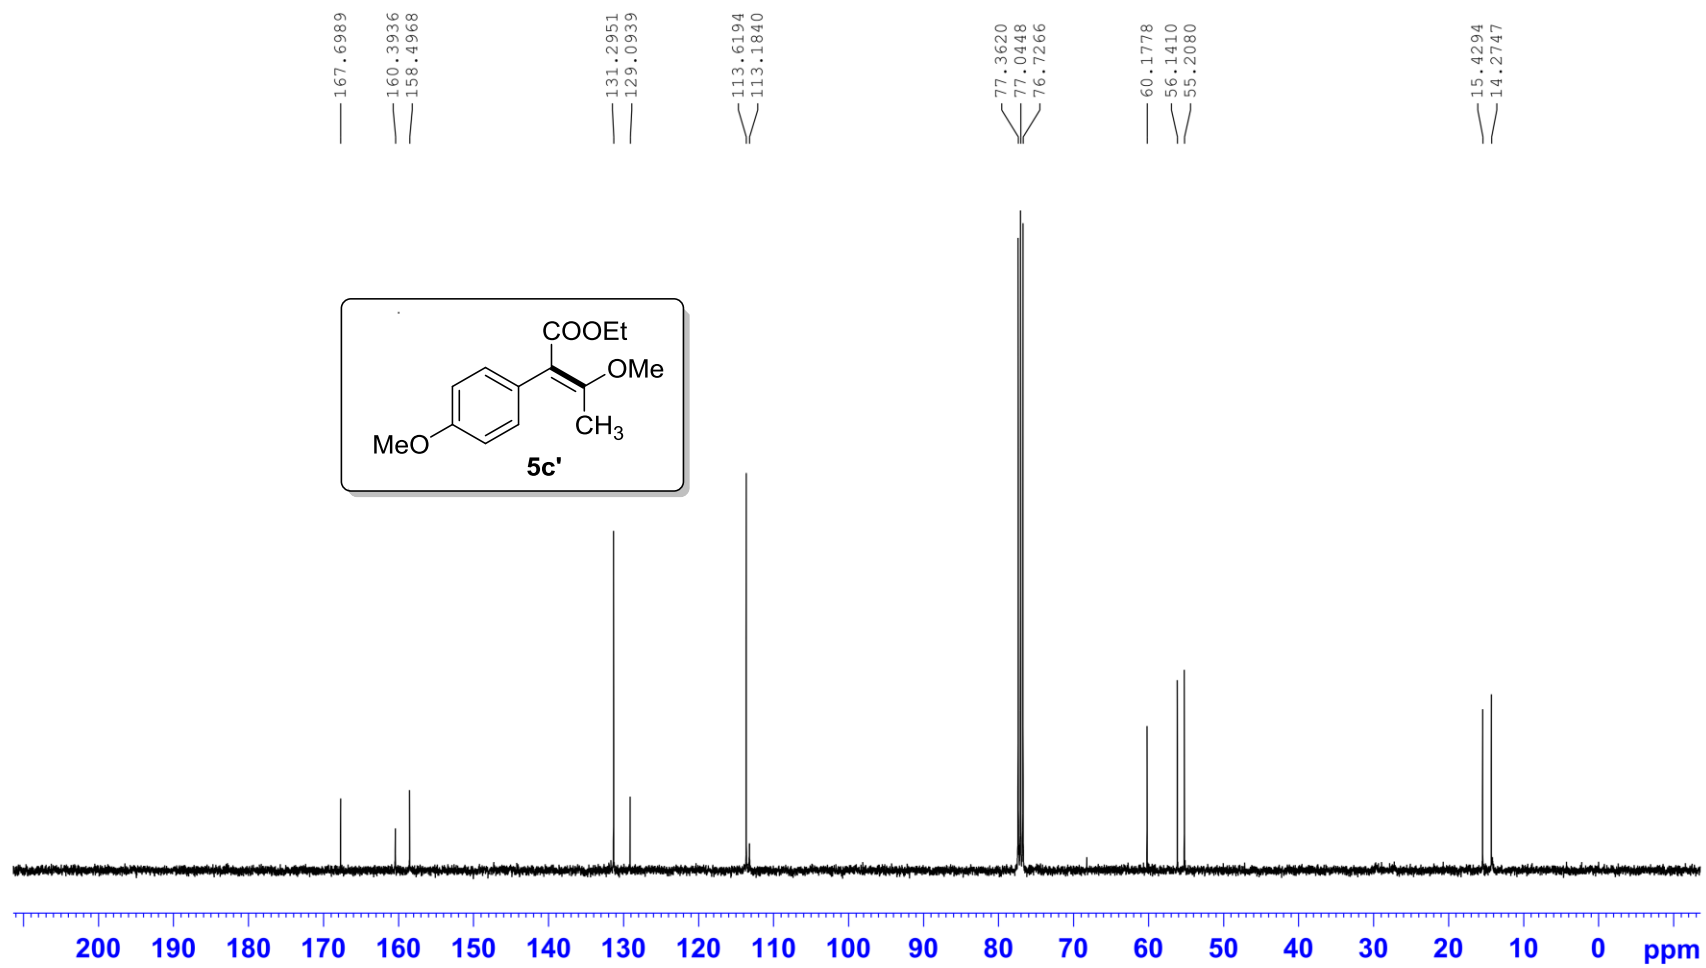

LJW-X170703-14-HNMR

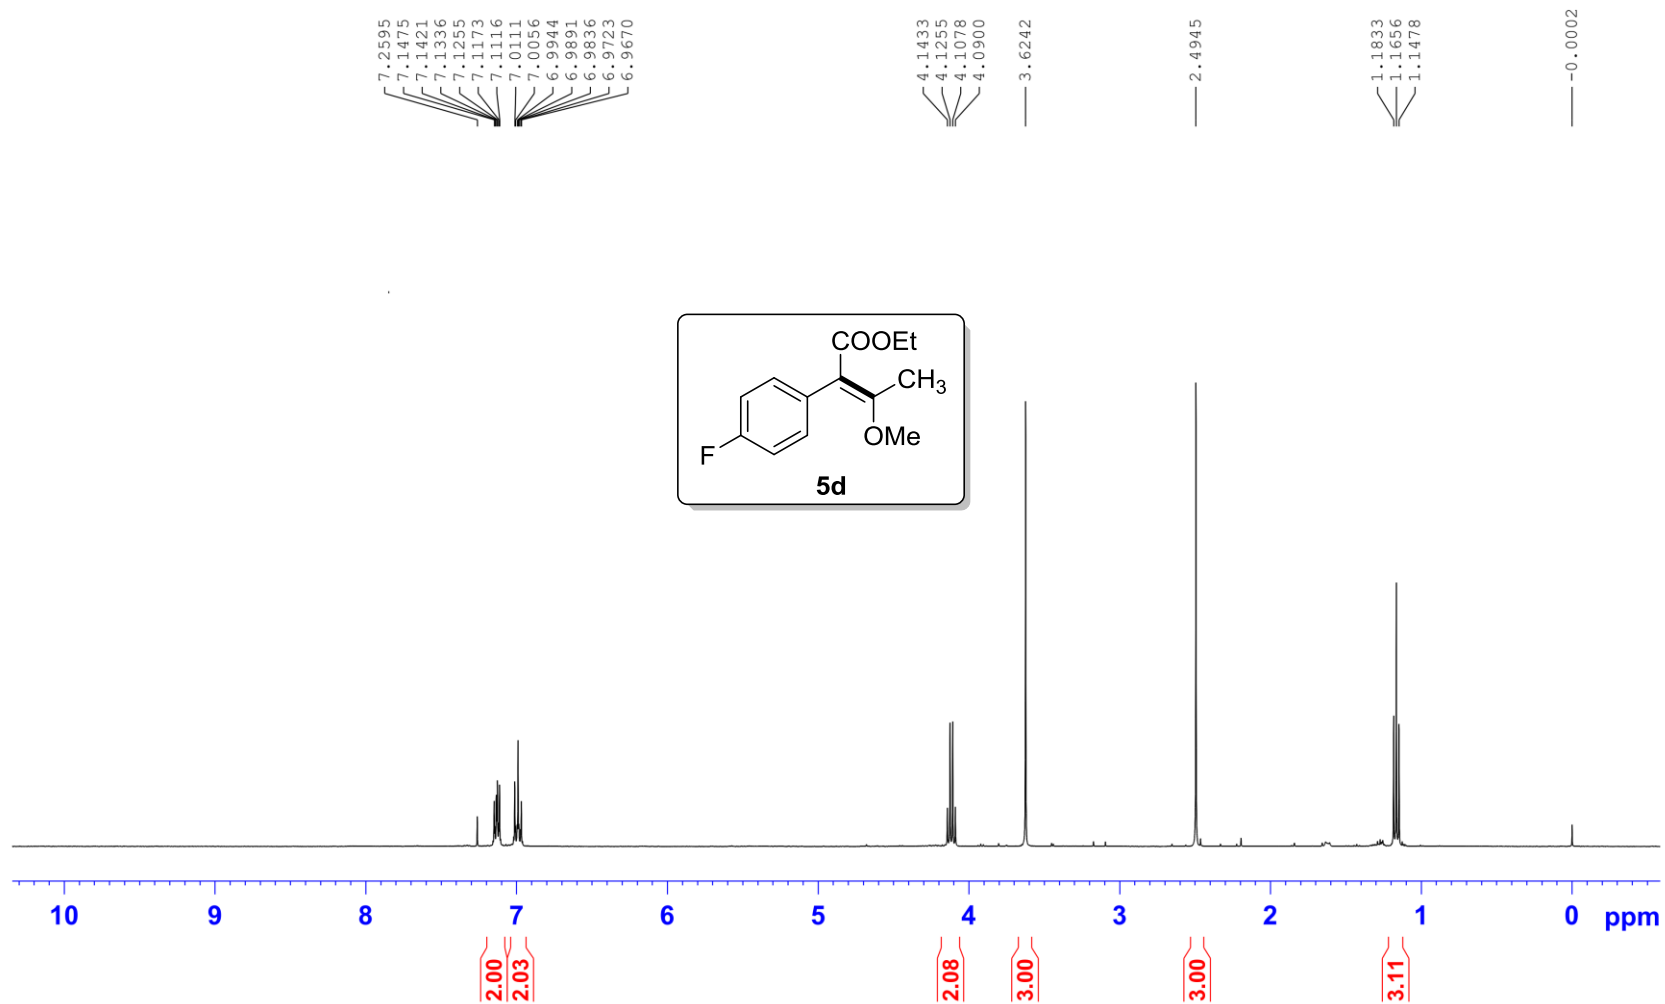

LJW-X170703-14-CNMR

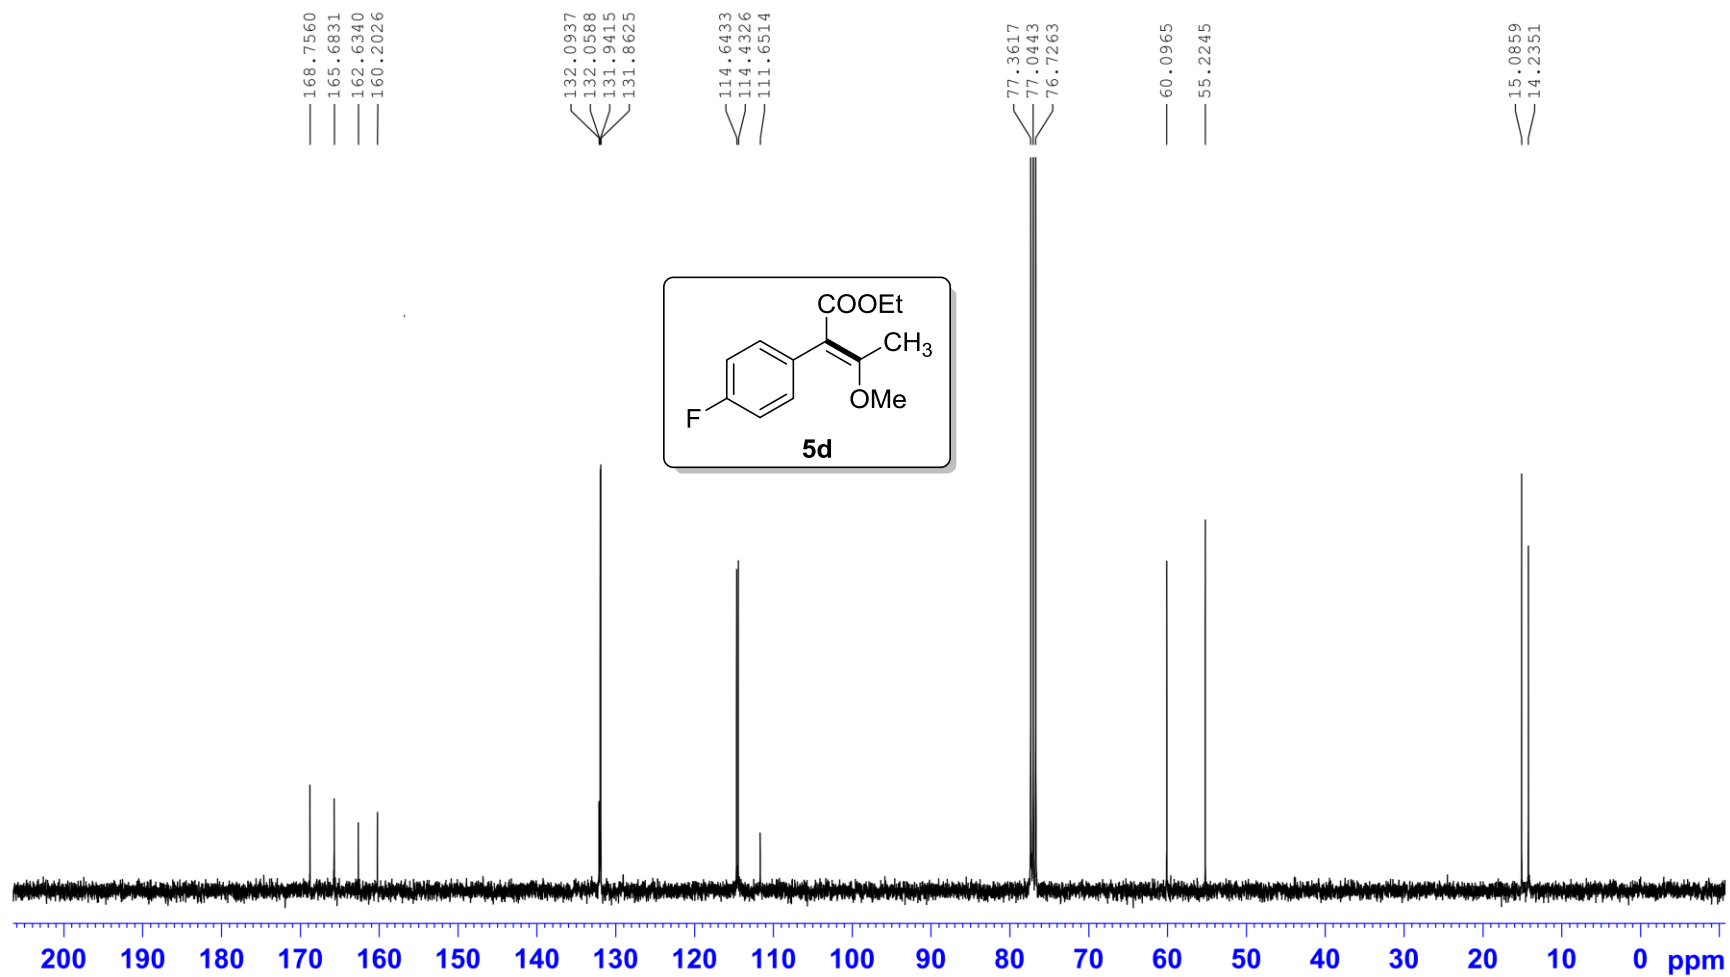

LJW-X170703-14-FNMR

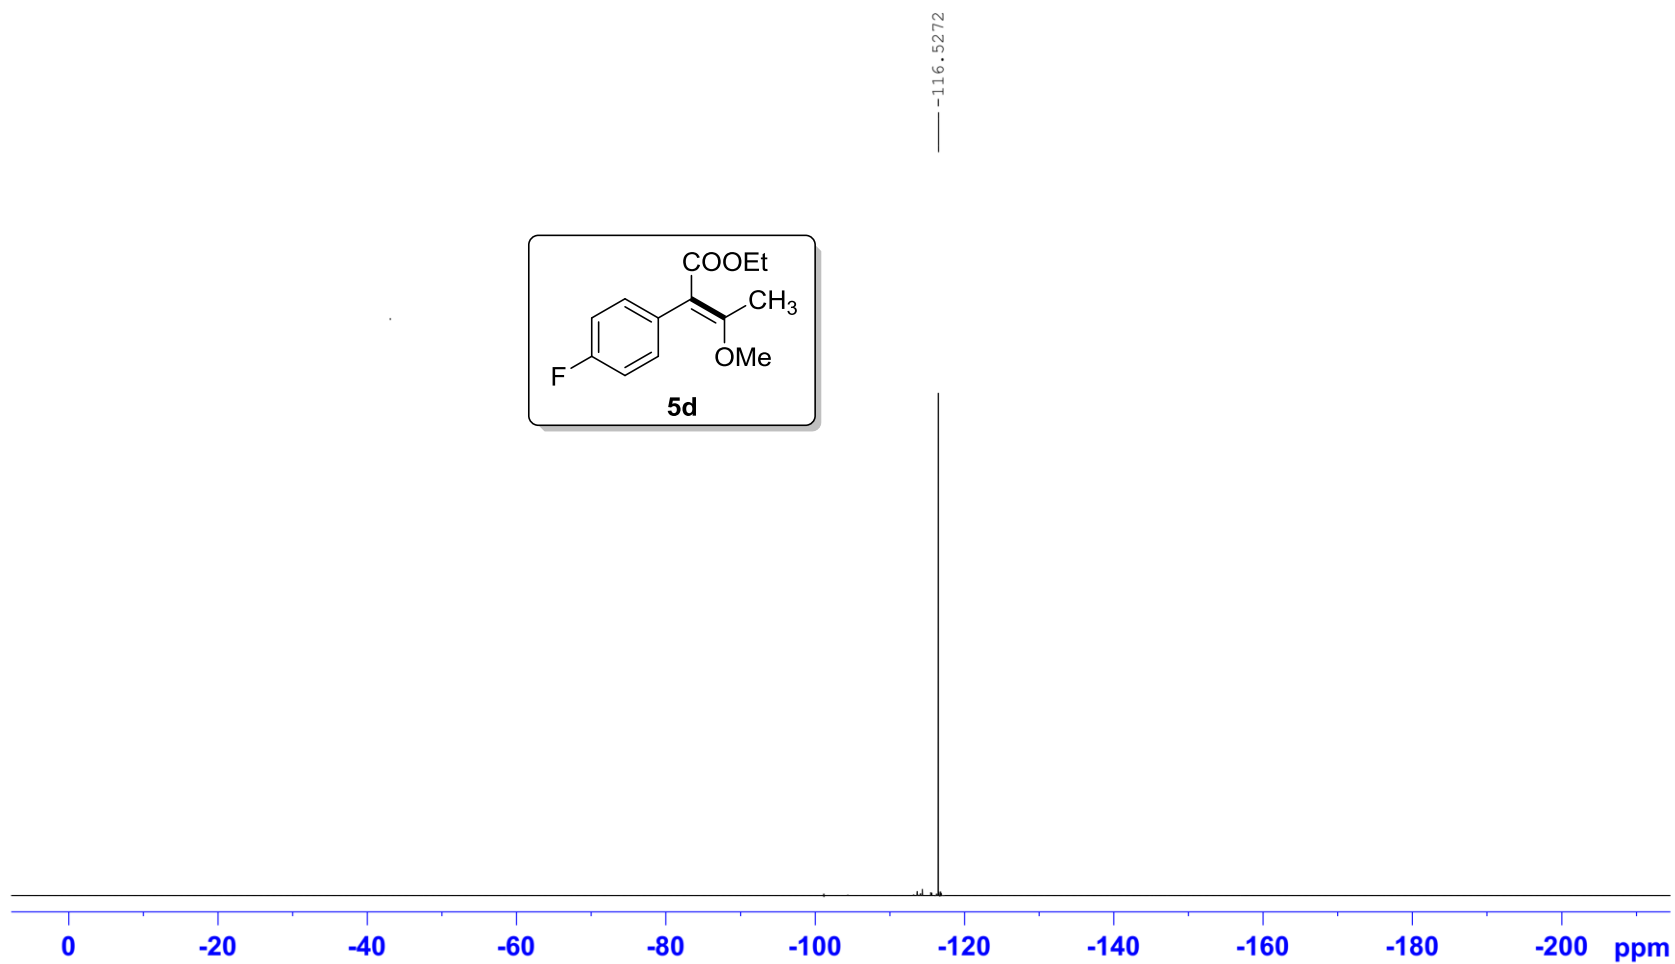

LJW-X180528-4-HNMR

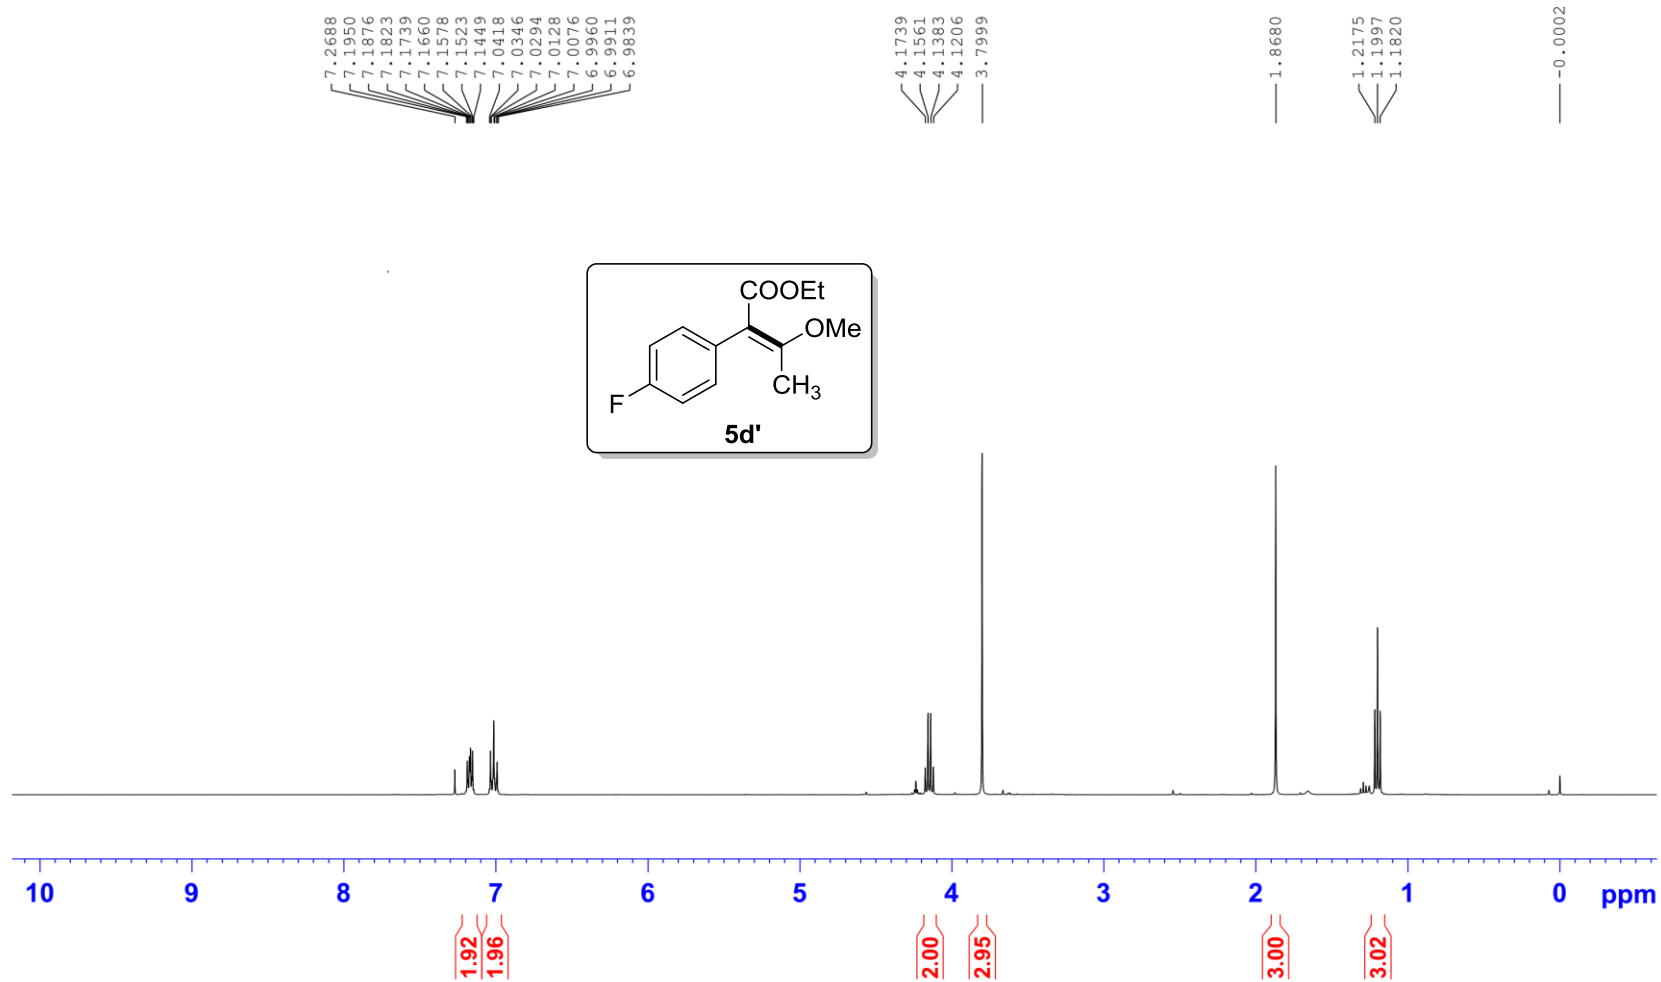

LJW-X180528-4-CNMR

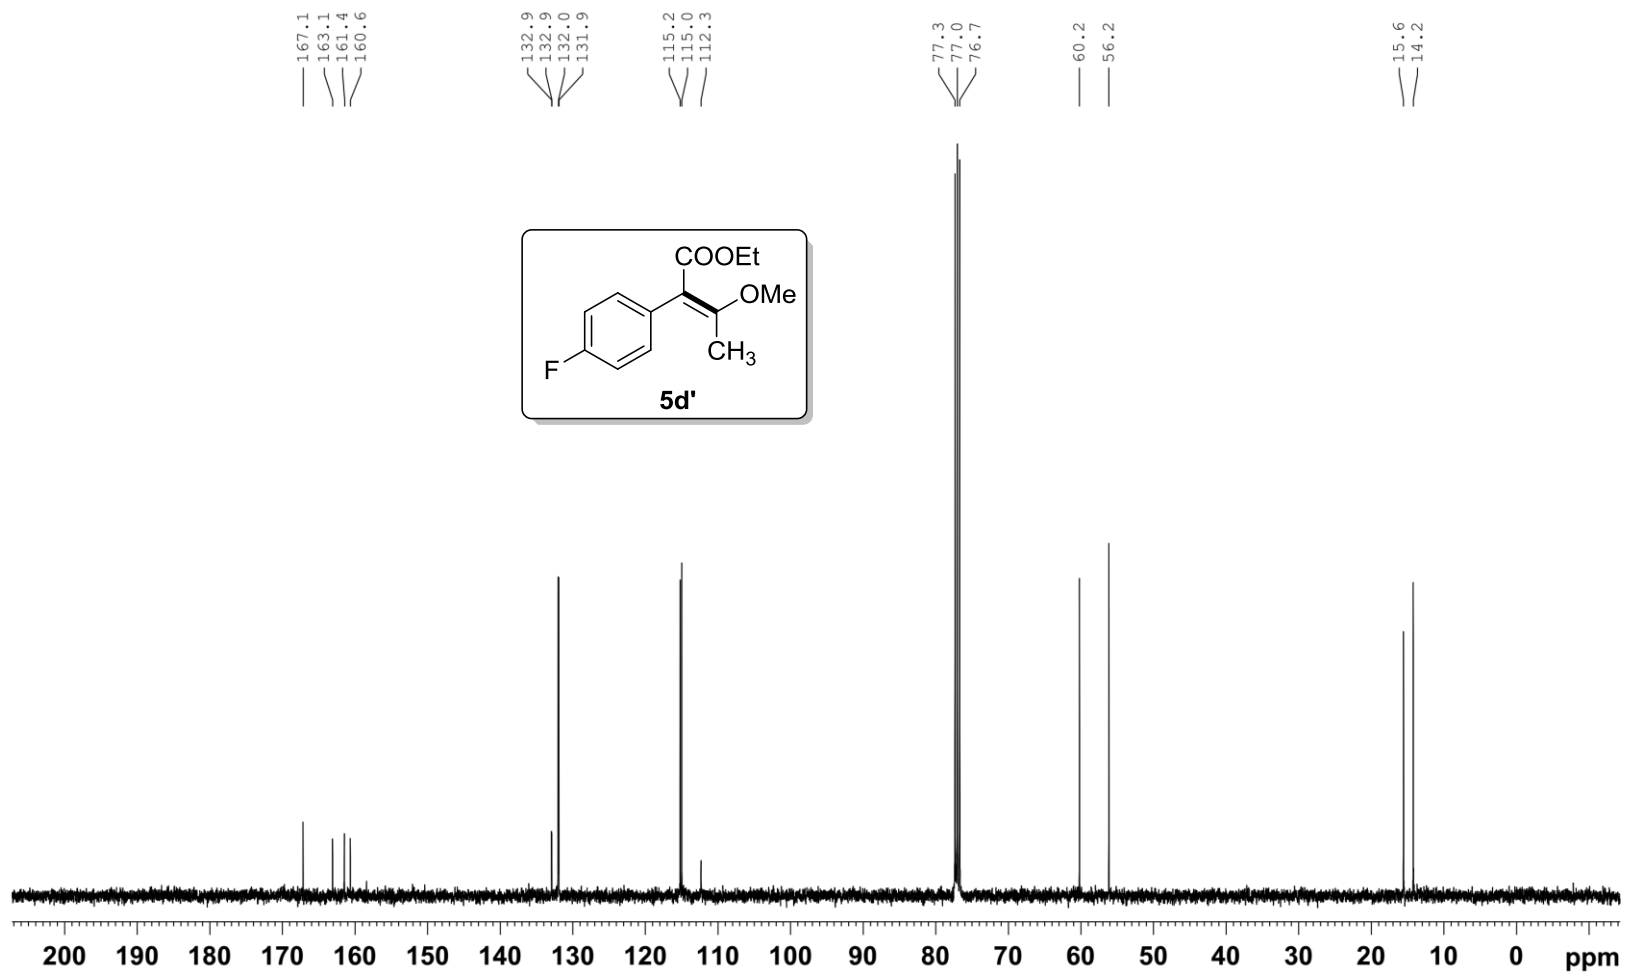

LJW-X180523-7-FNMR

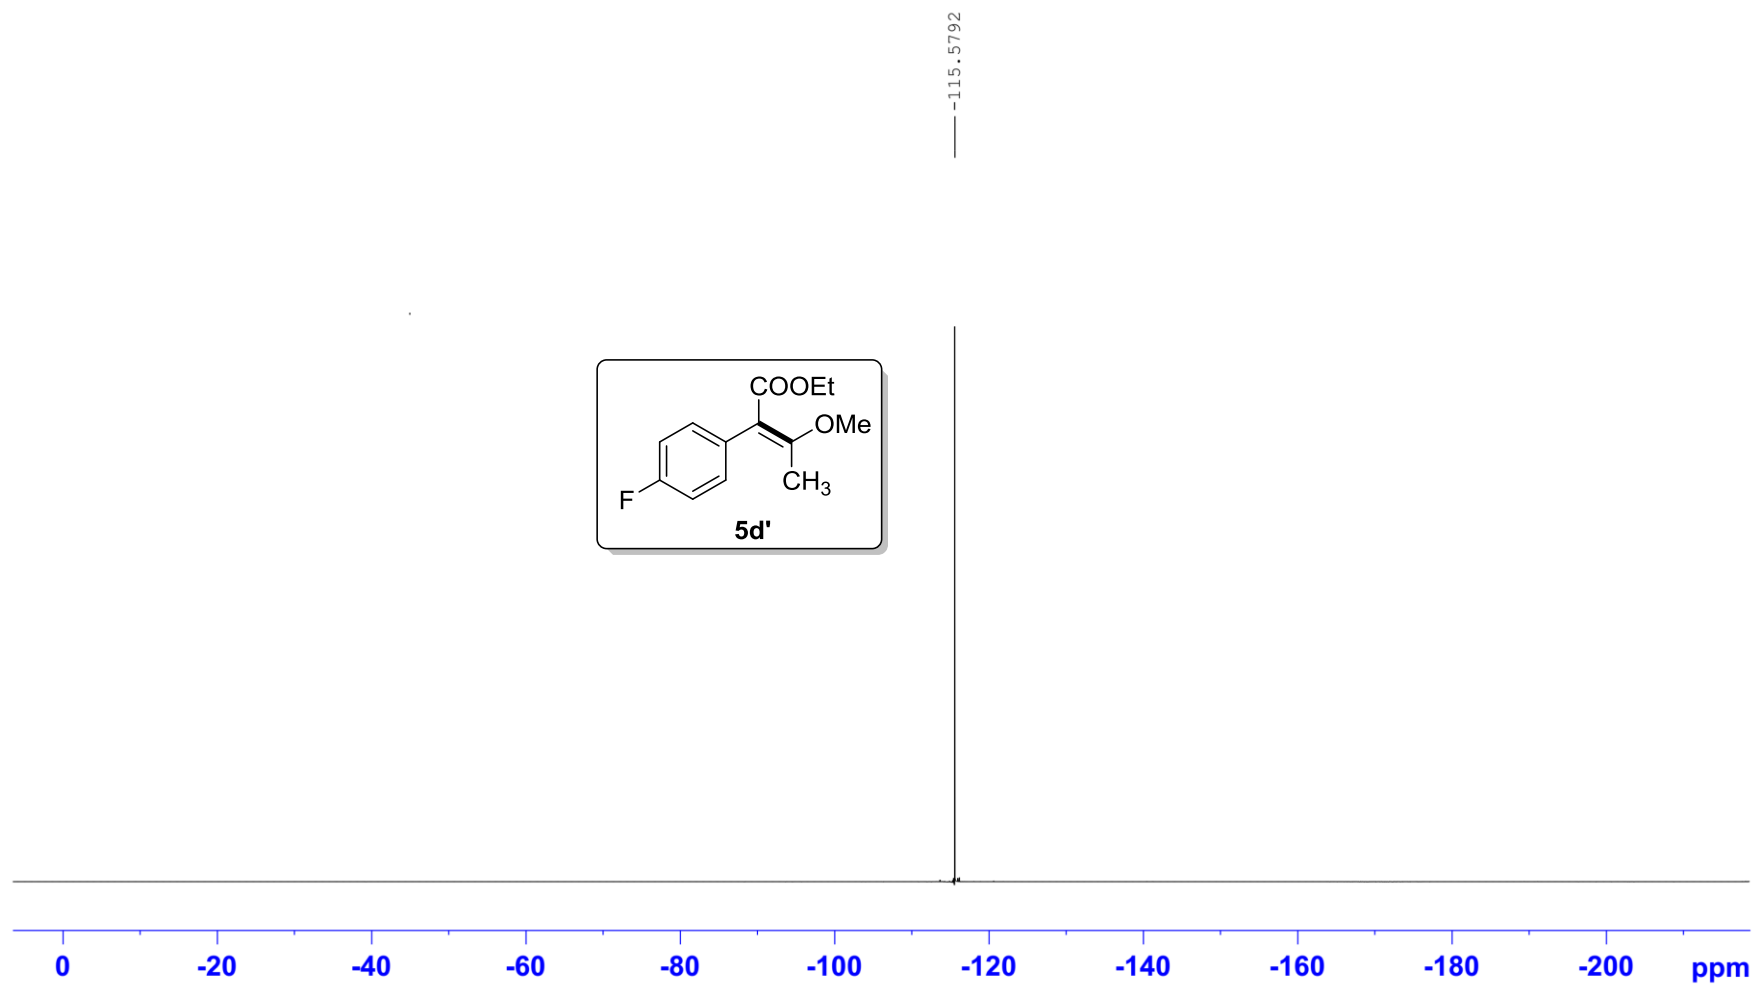

LJW-X170705-6-HNMR

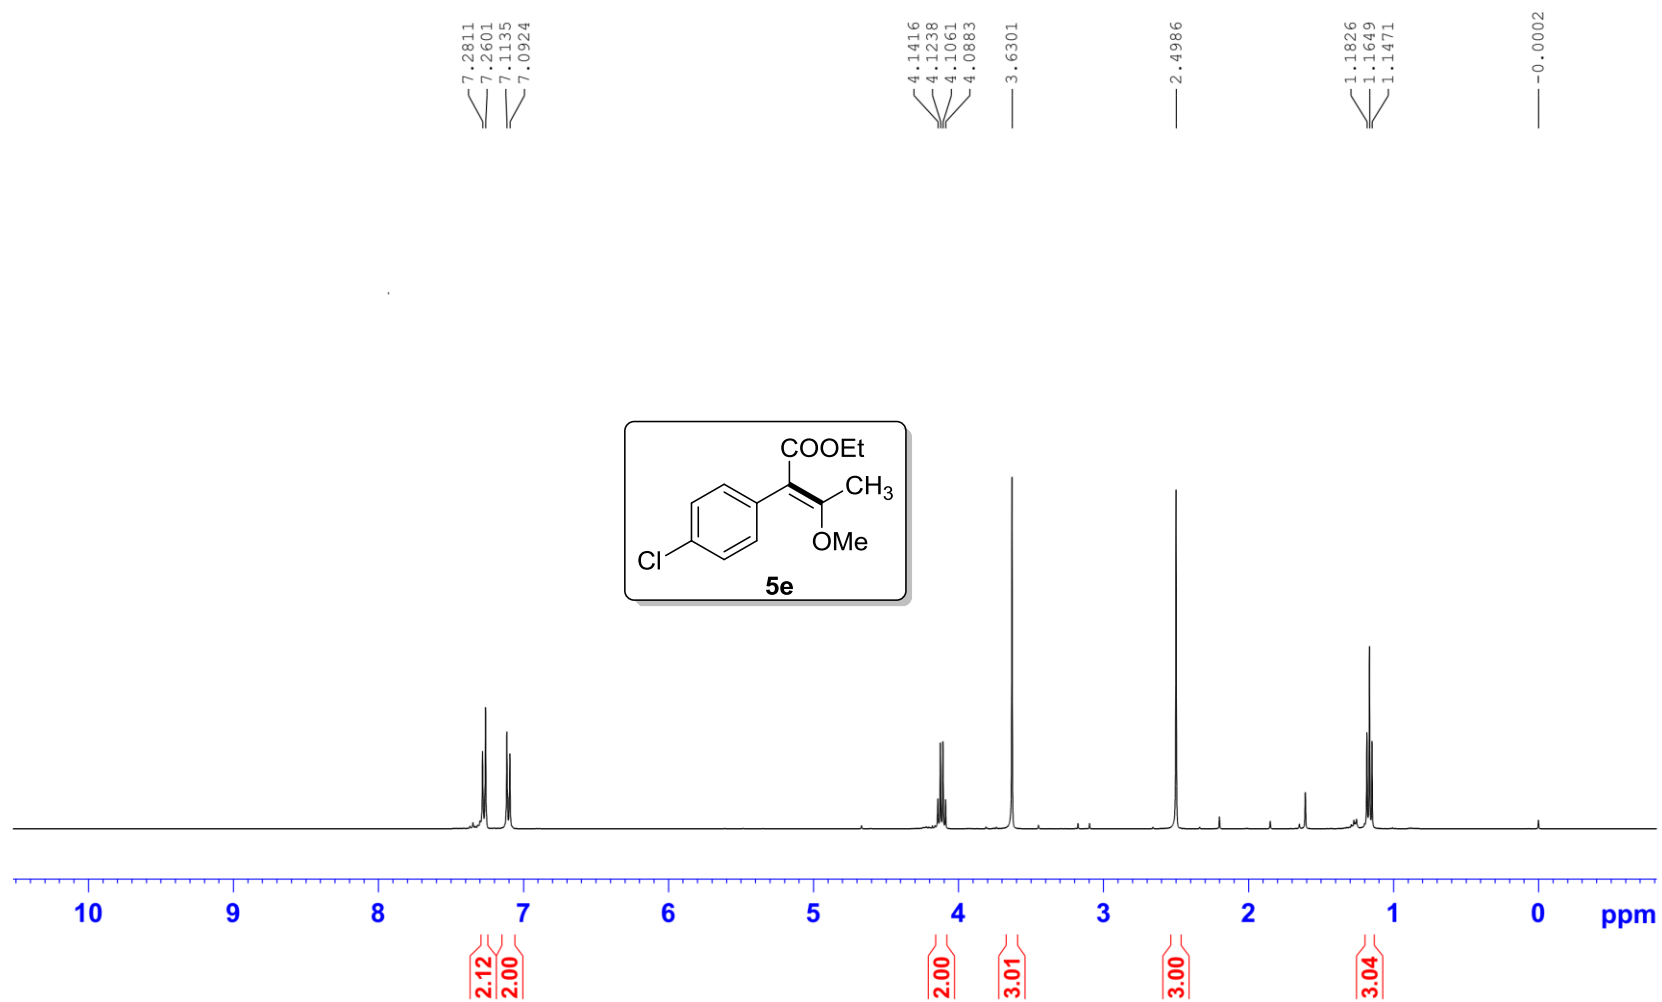

LJW-X170705-6-CNMR

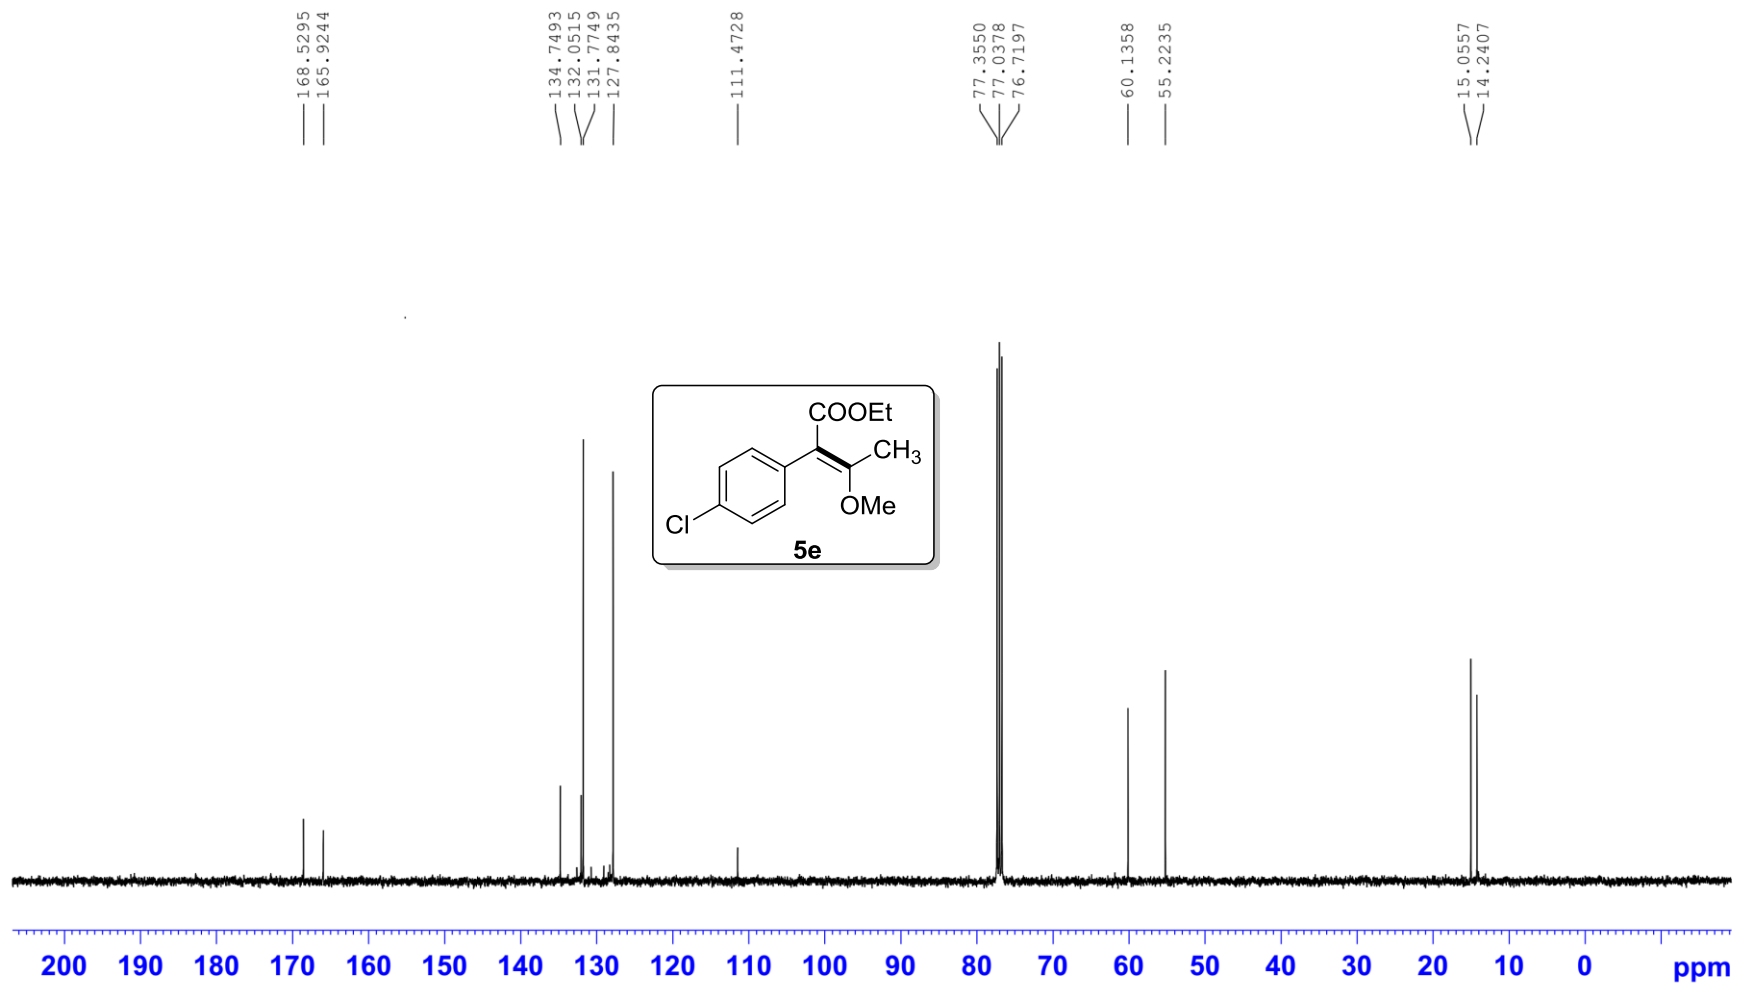

LJW-X180531-6-HNMR

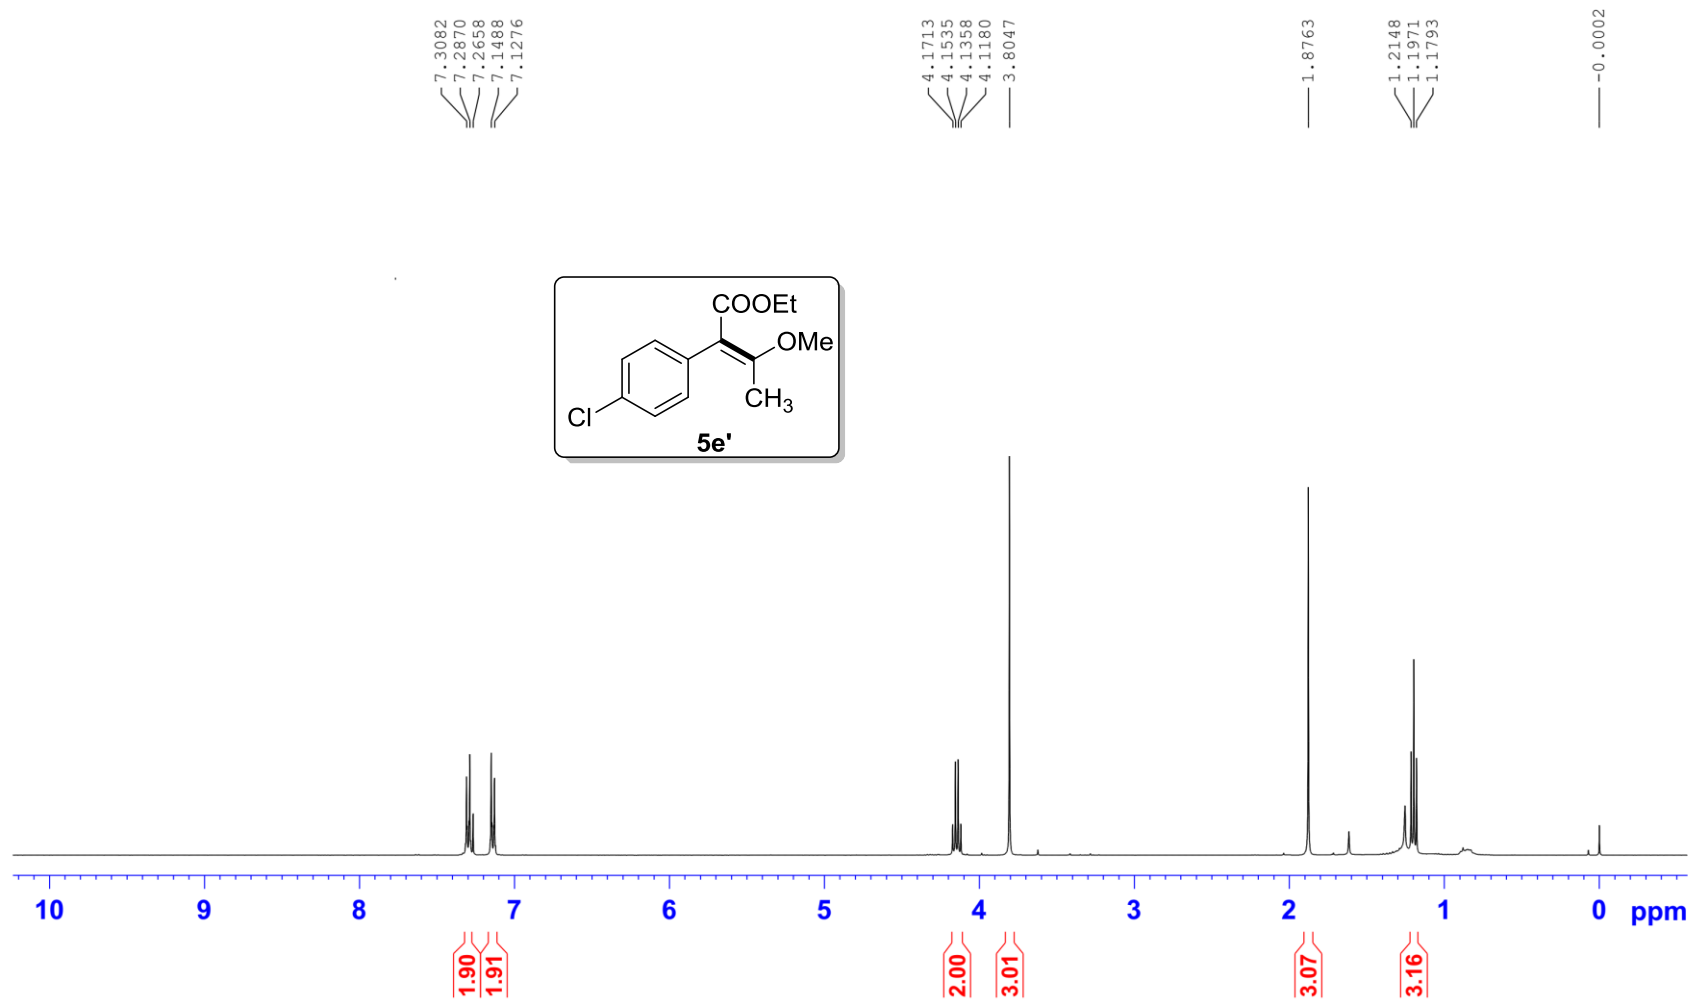

LJW-X180531-6-CNMR

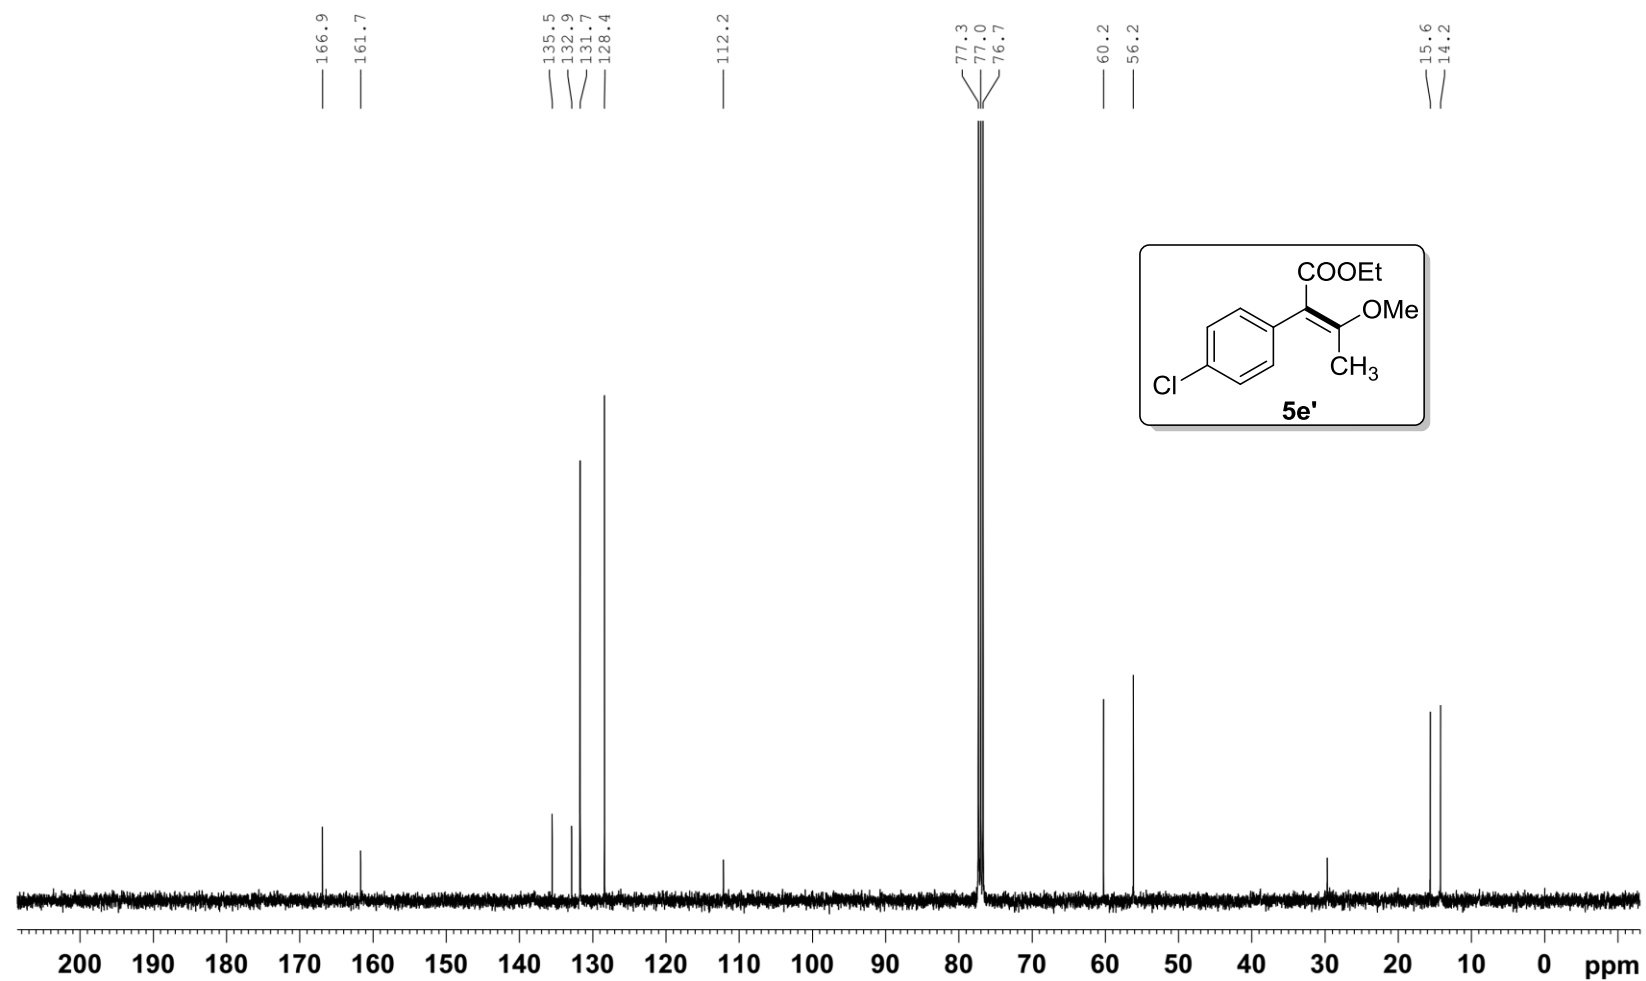

LJW-X170708-2-HNMR

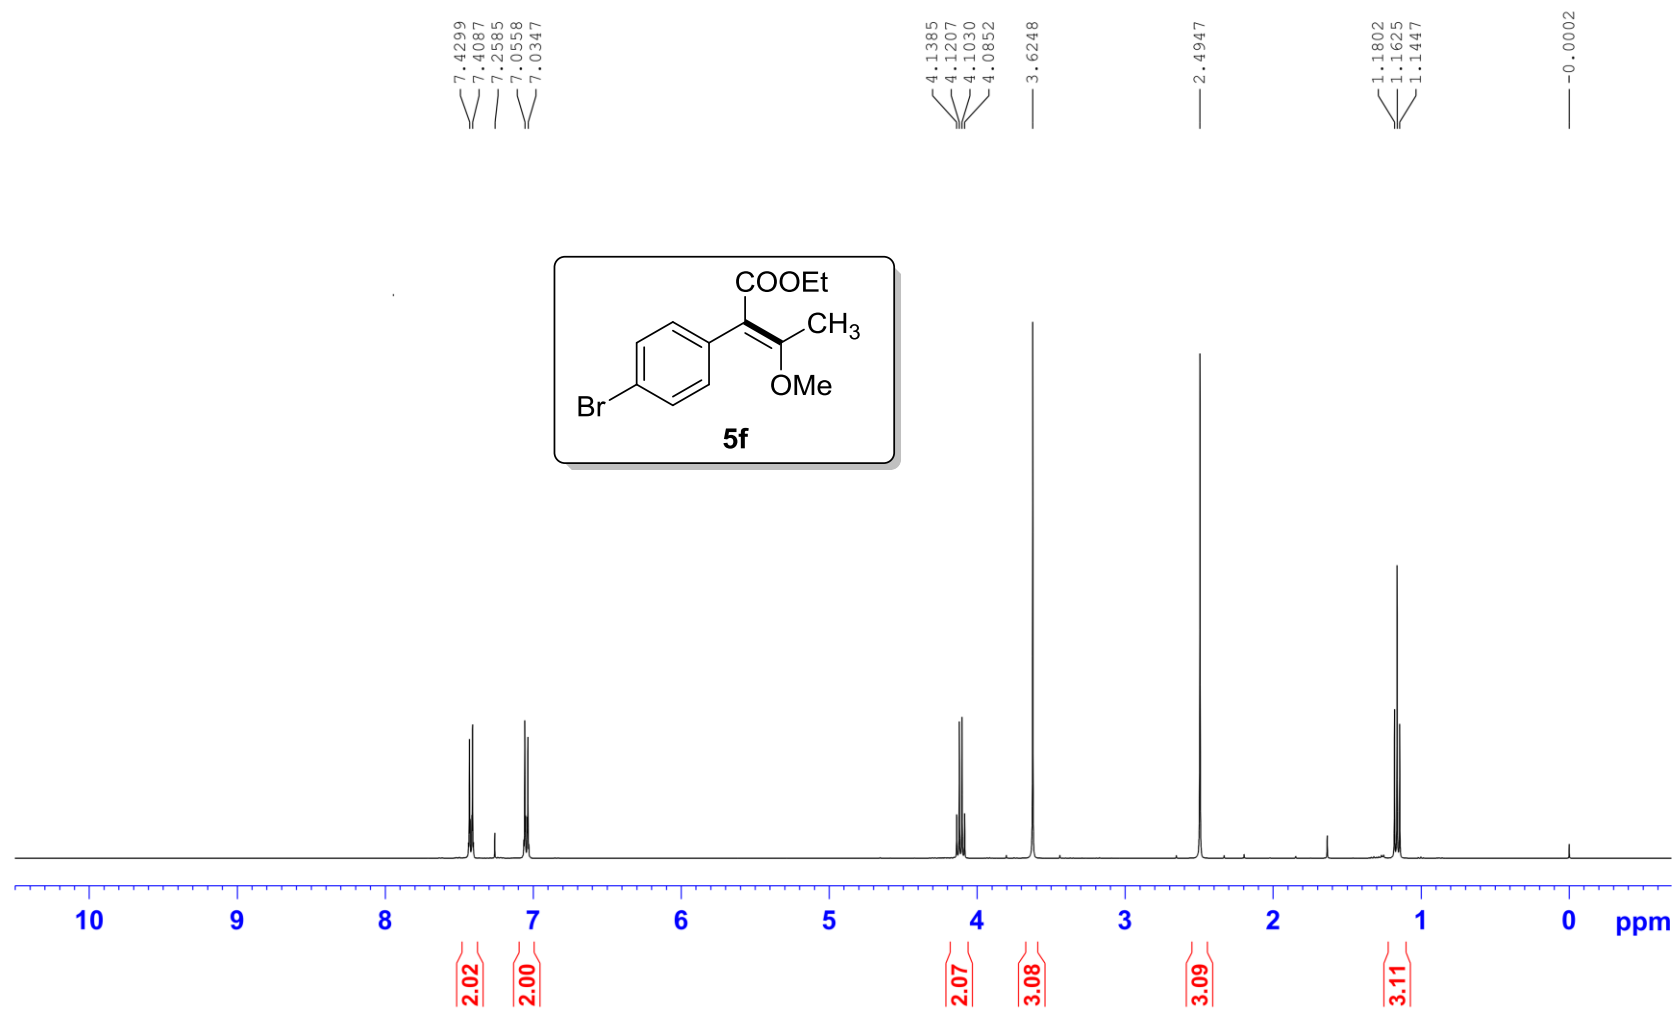

LJW-X170708-2-CNMR

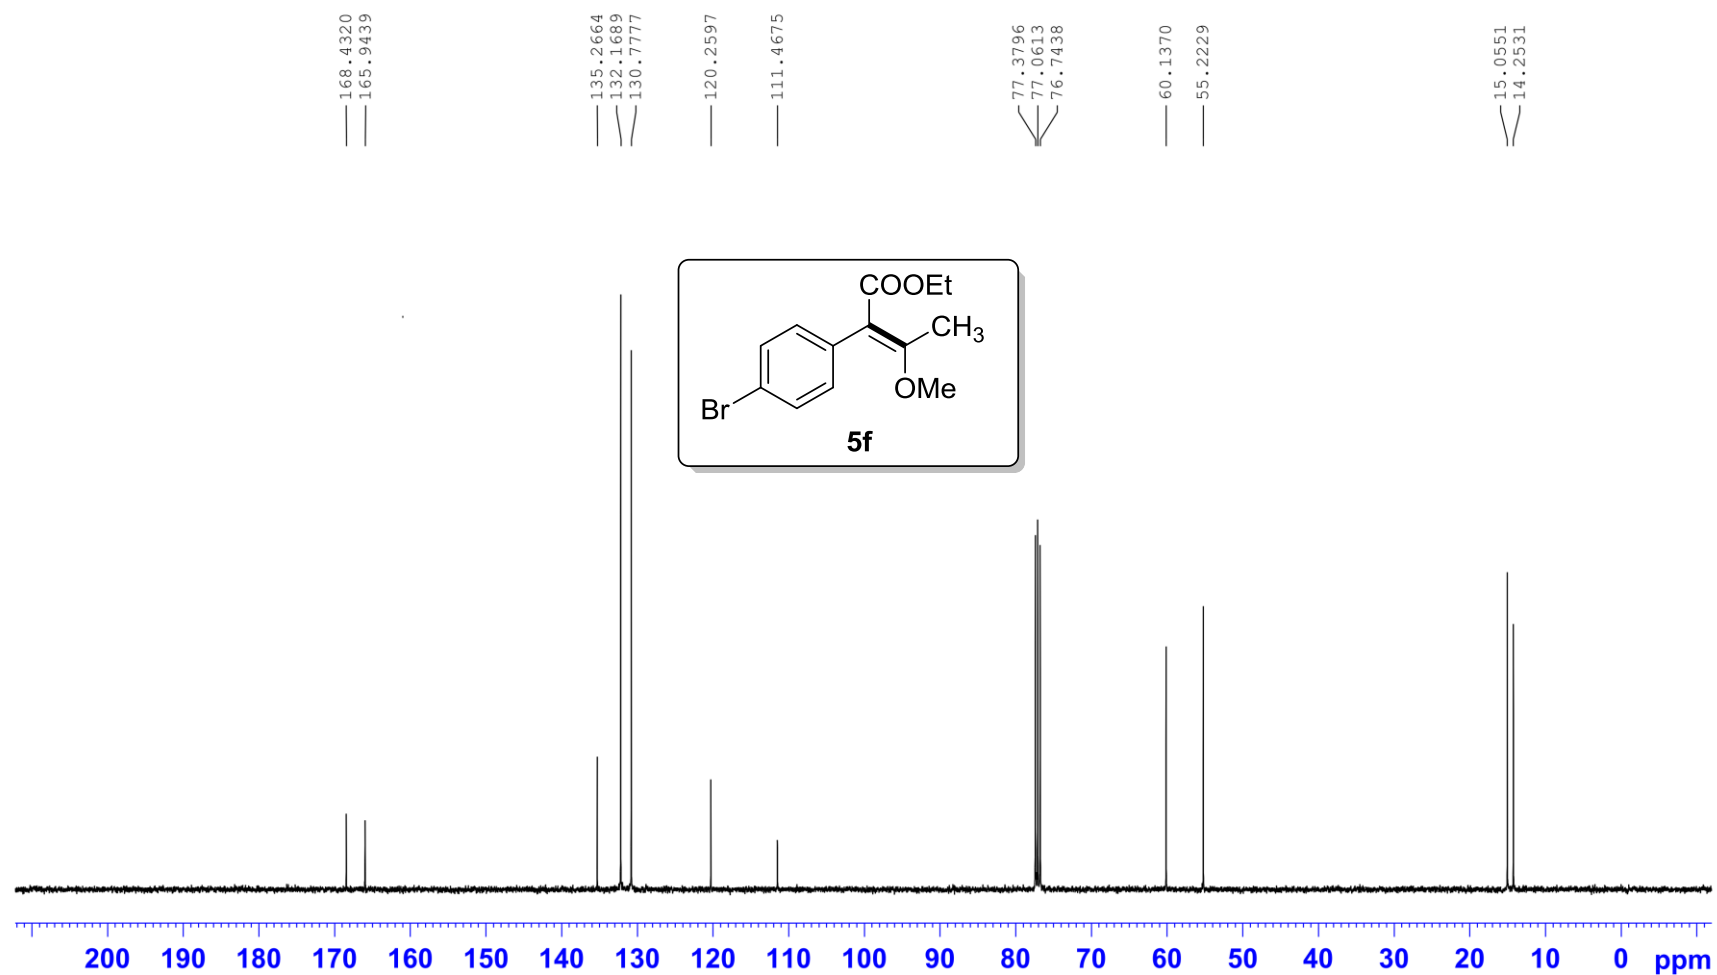

LJW-X170706-5-HNMR

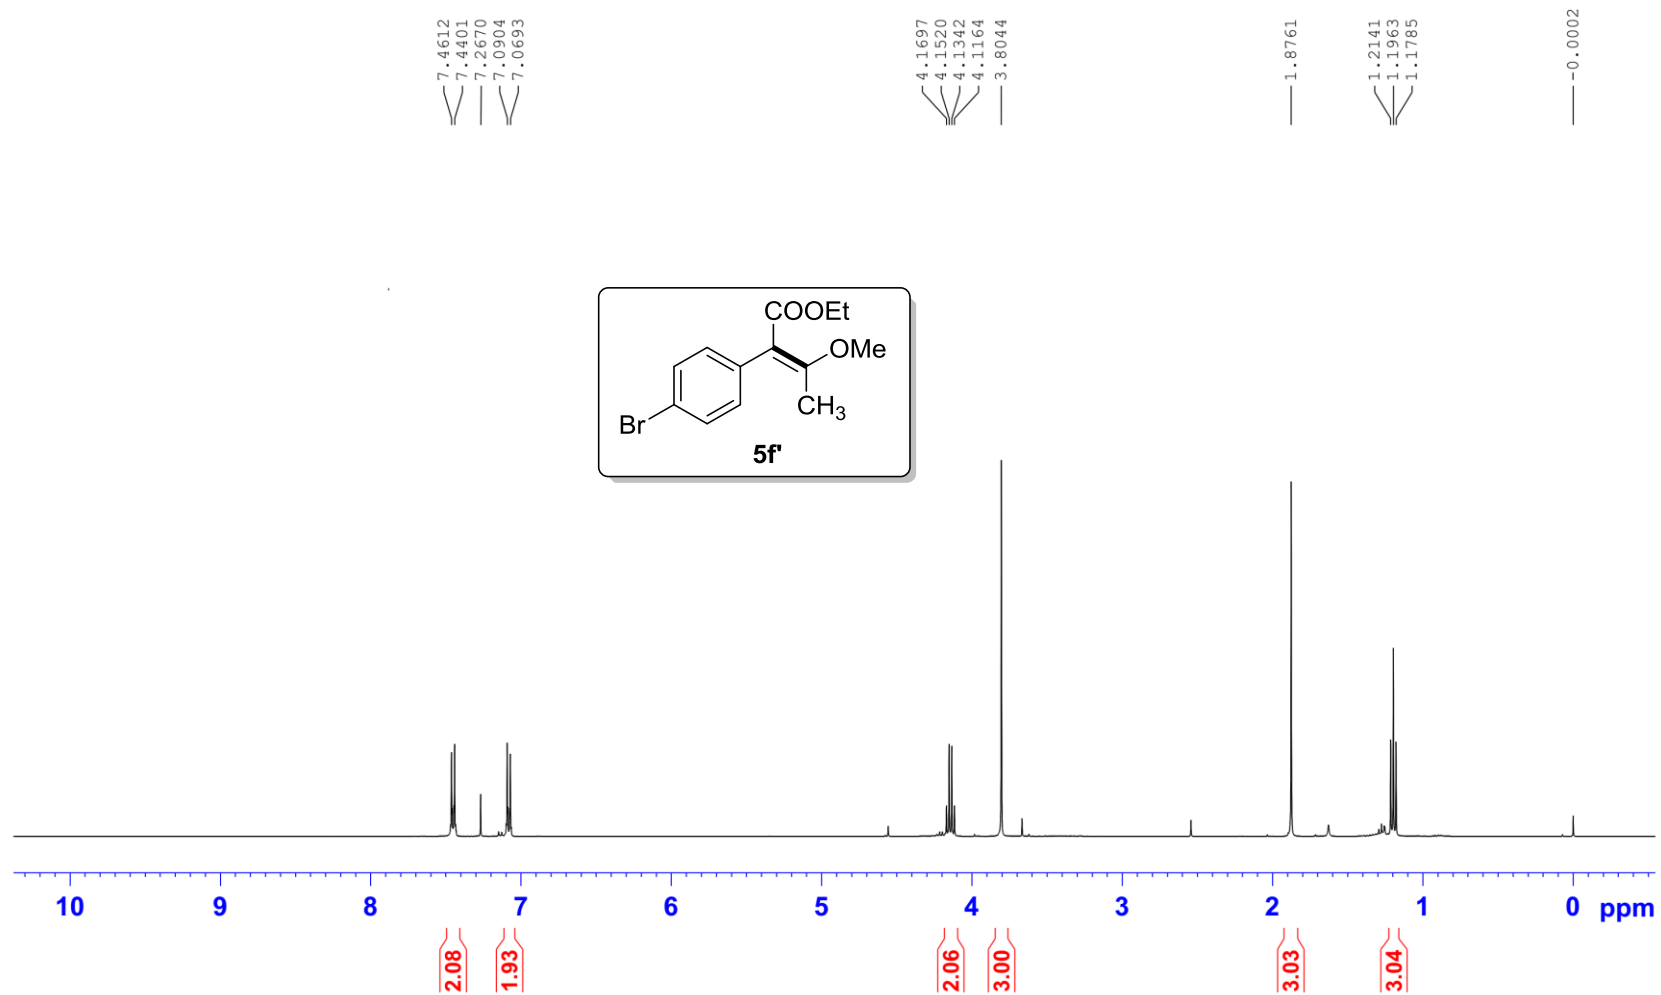

LJW-X170706-5-CNMR

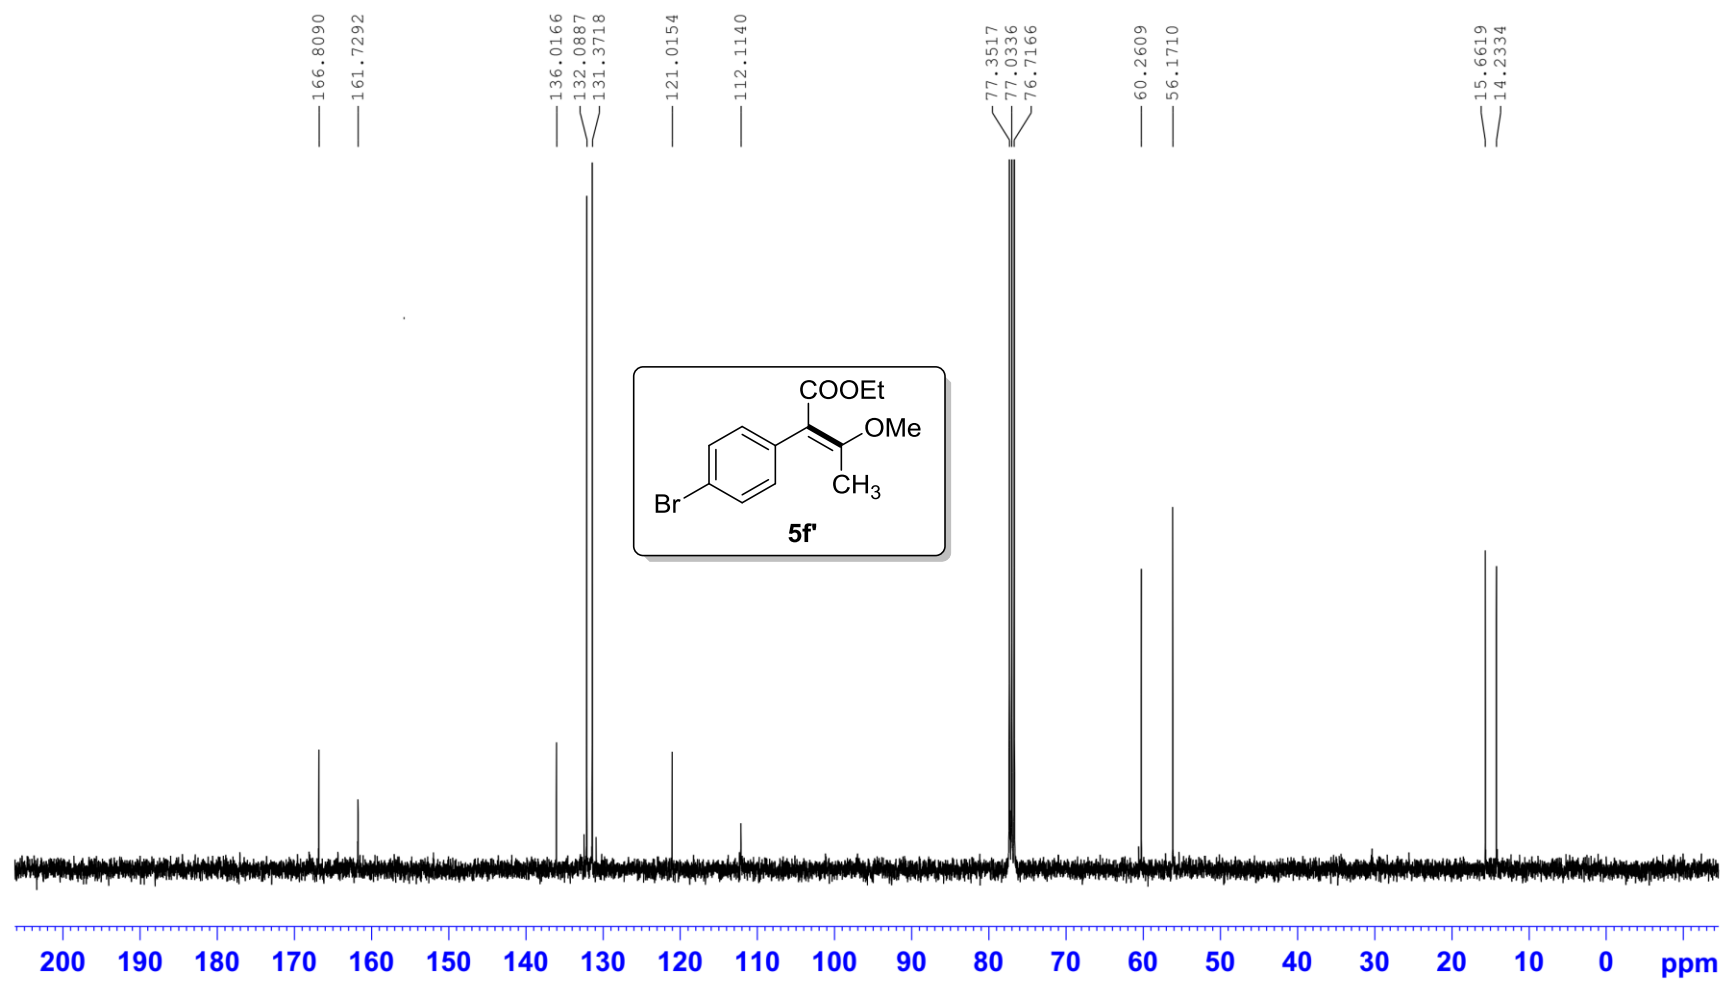

LJW-X180606-8-HNMR

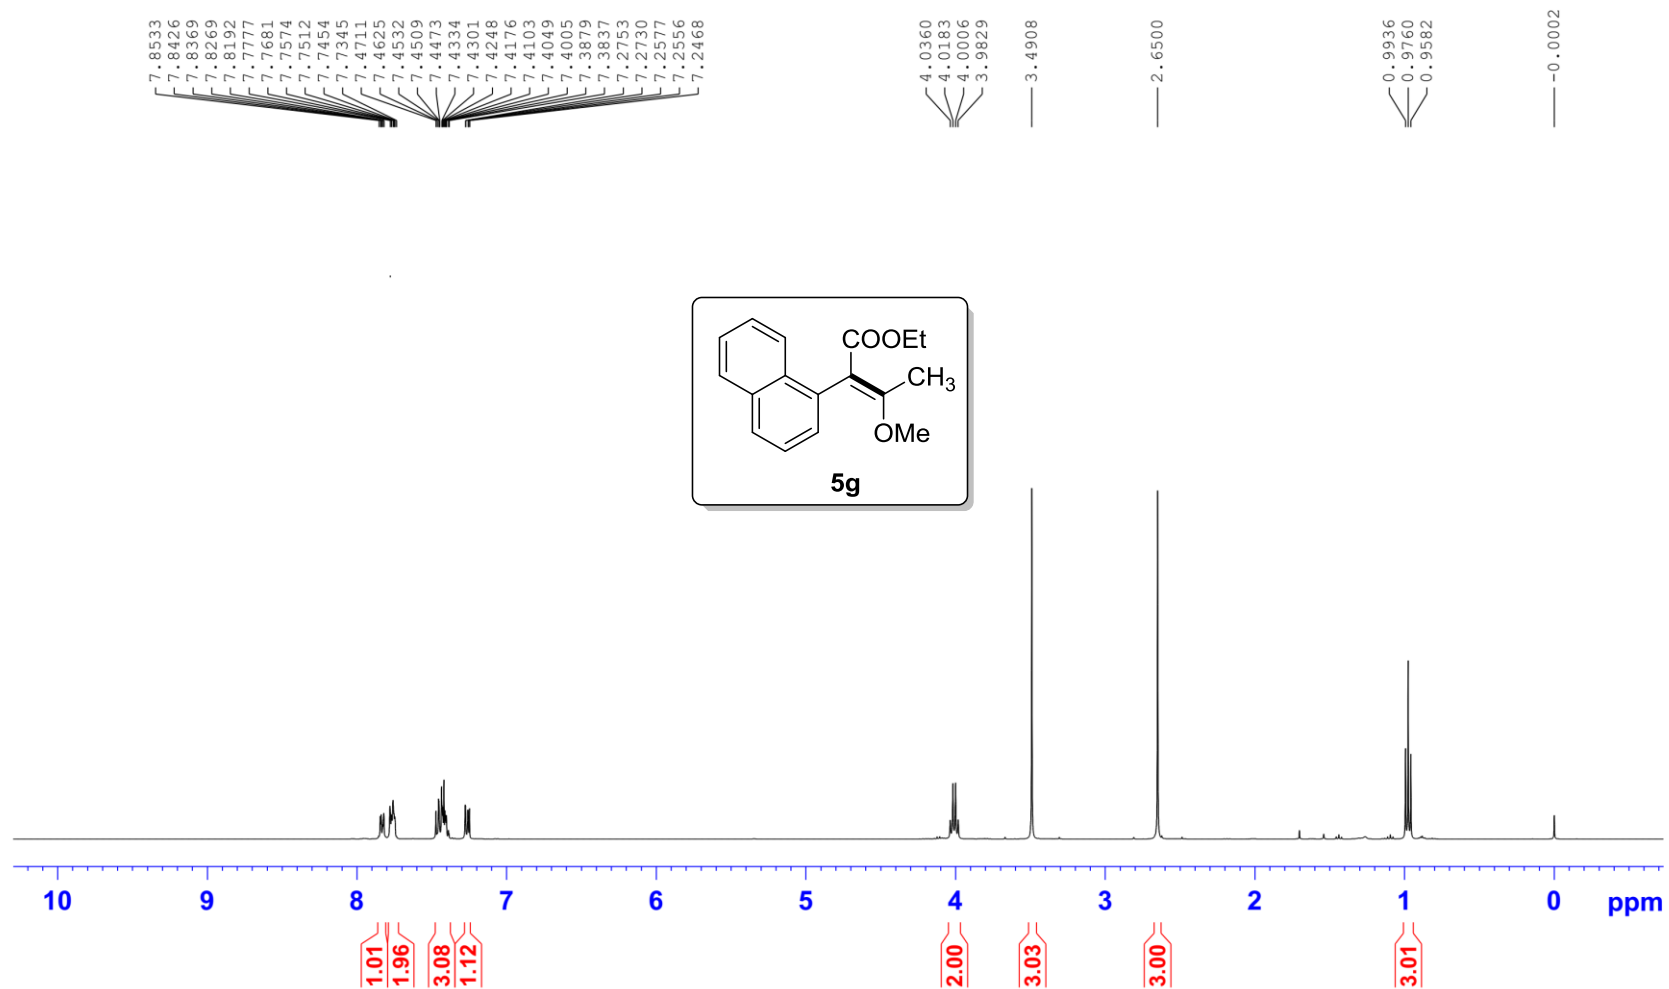

LJW-X180606-8-CNMR

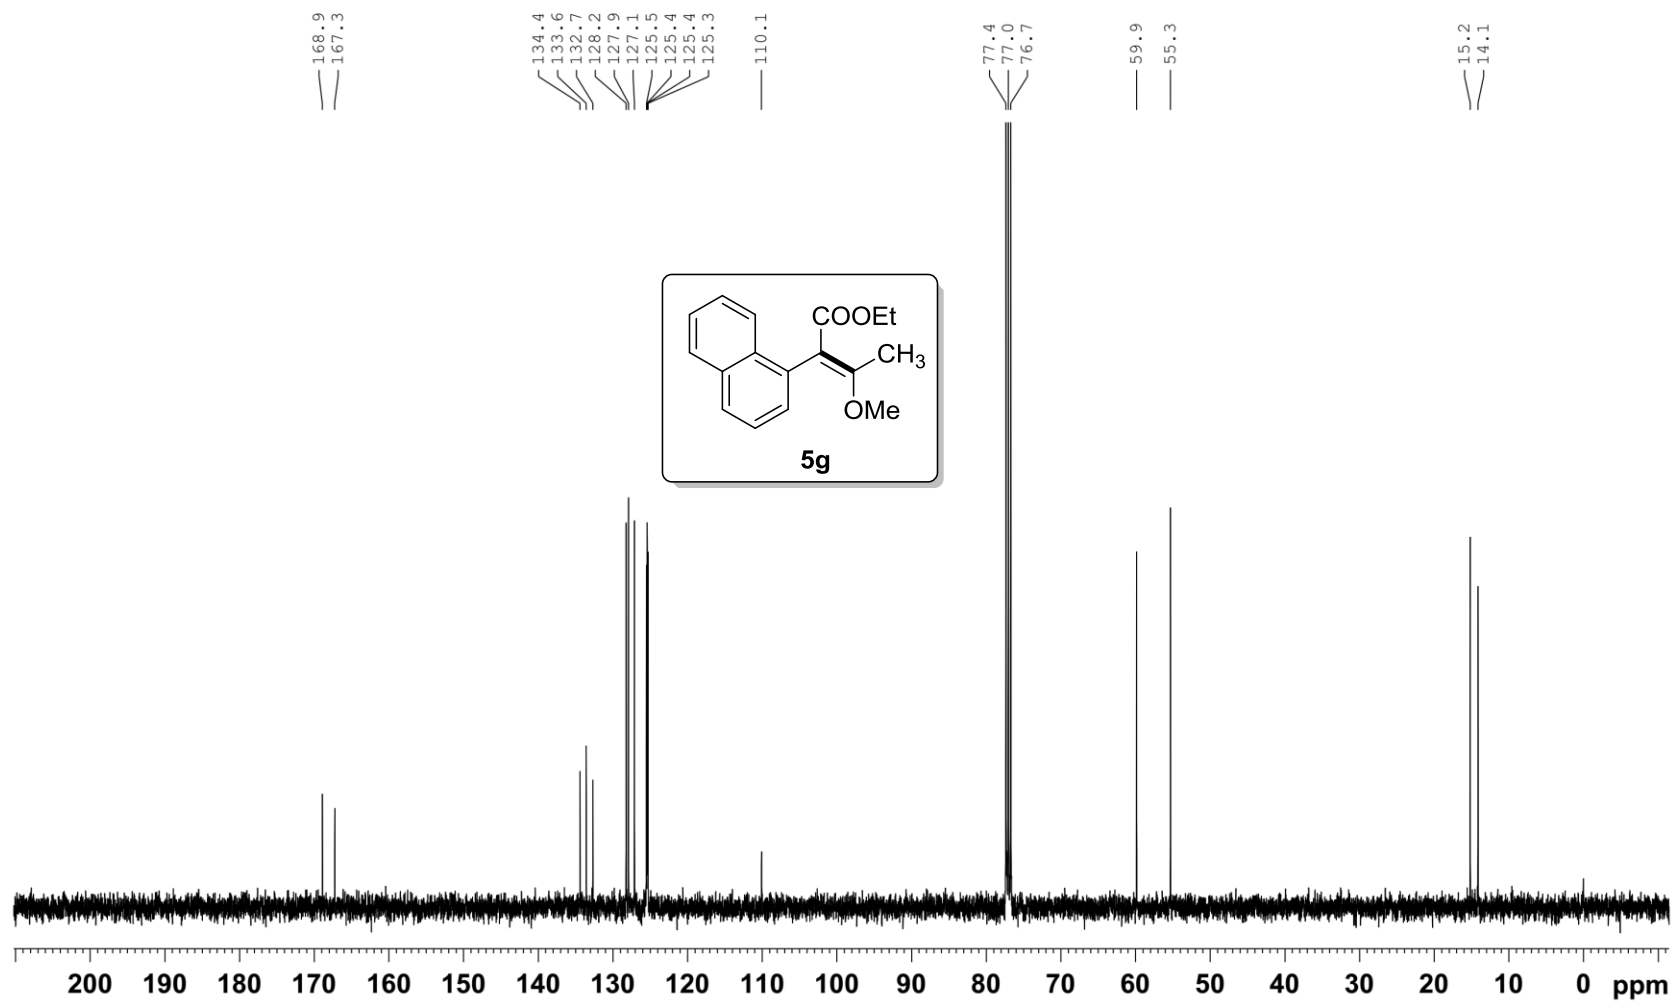

LJW-X180606-15-HNMR

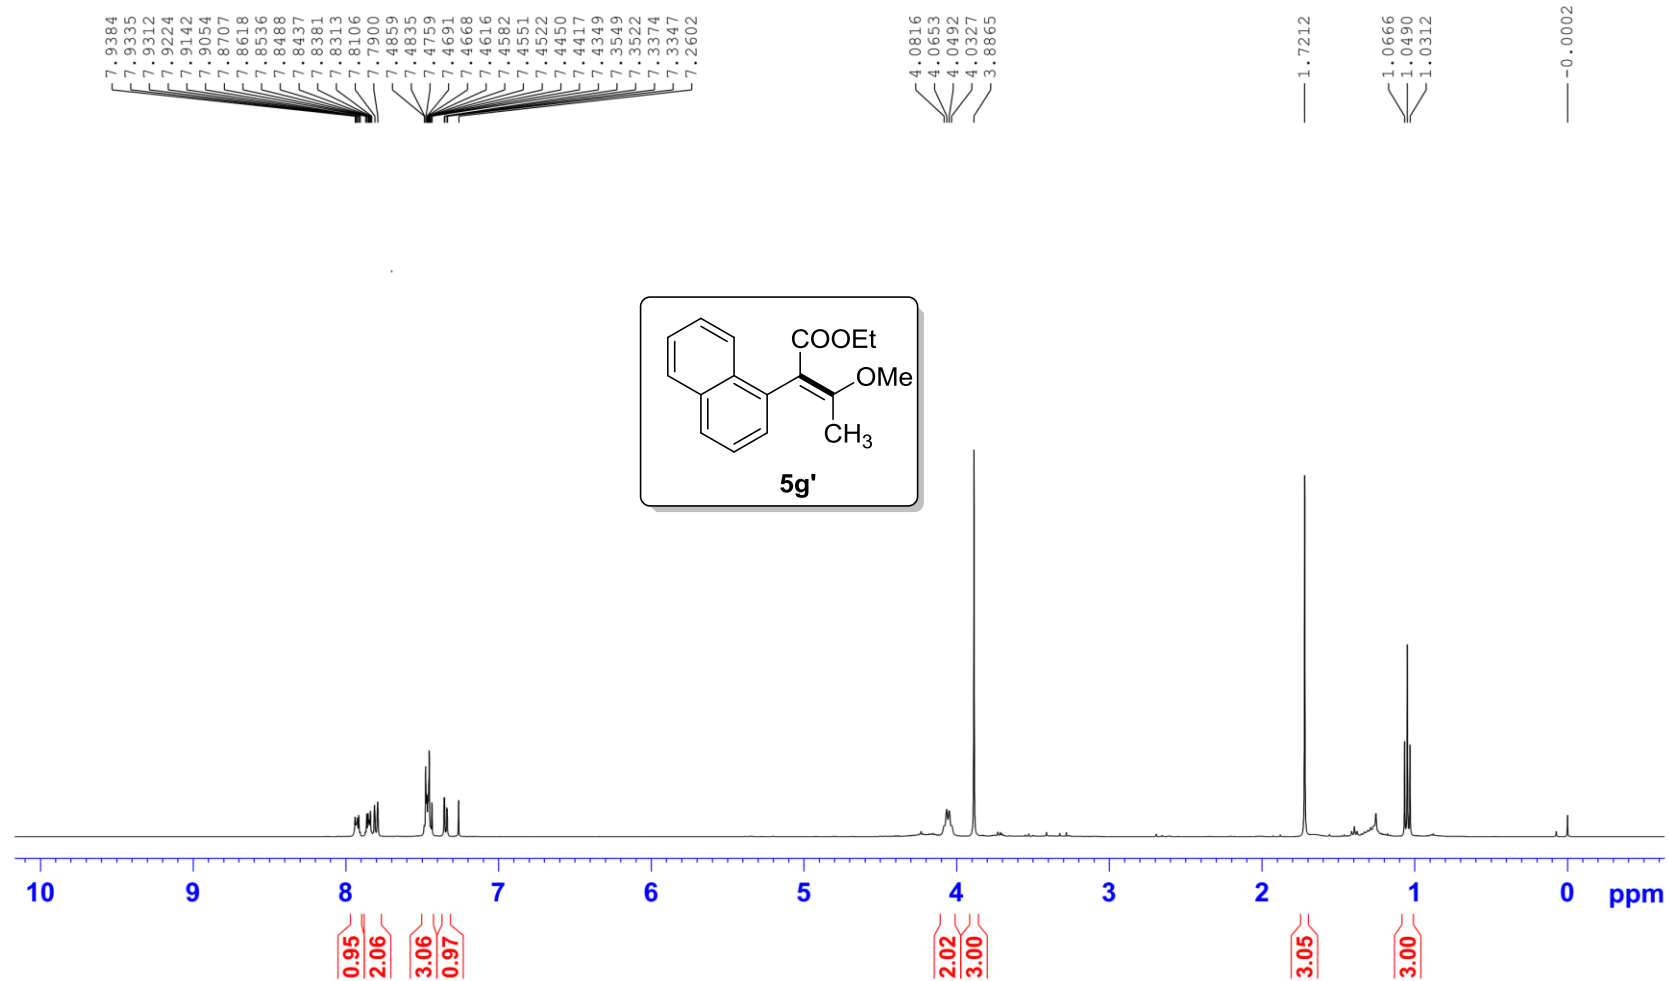

LJW-X180606-15-CNMR

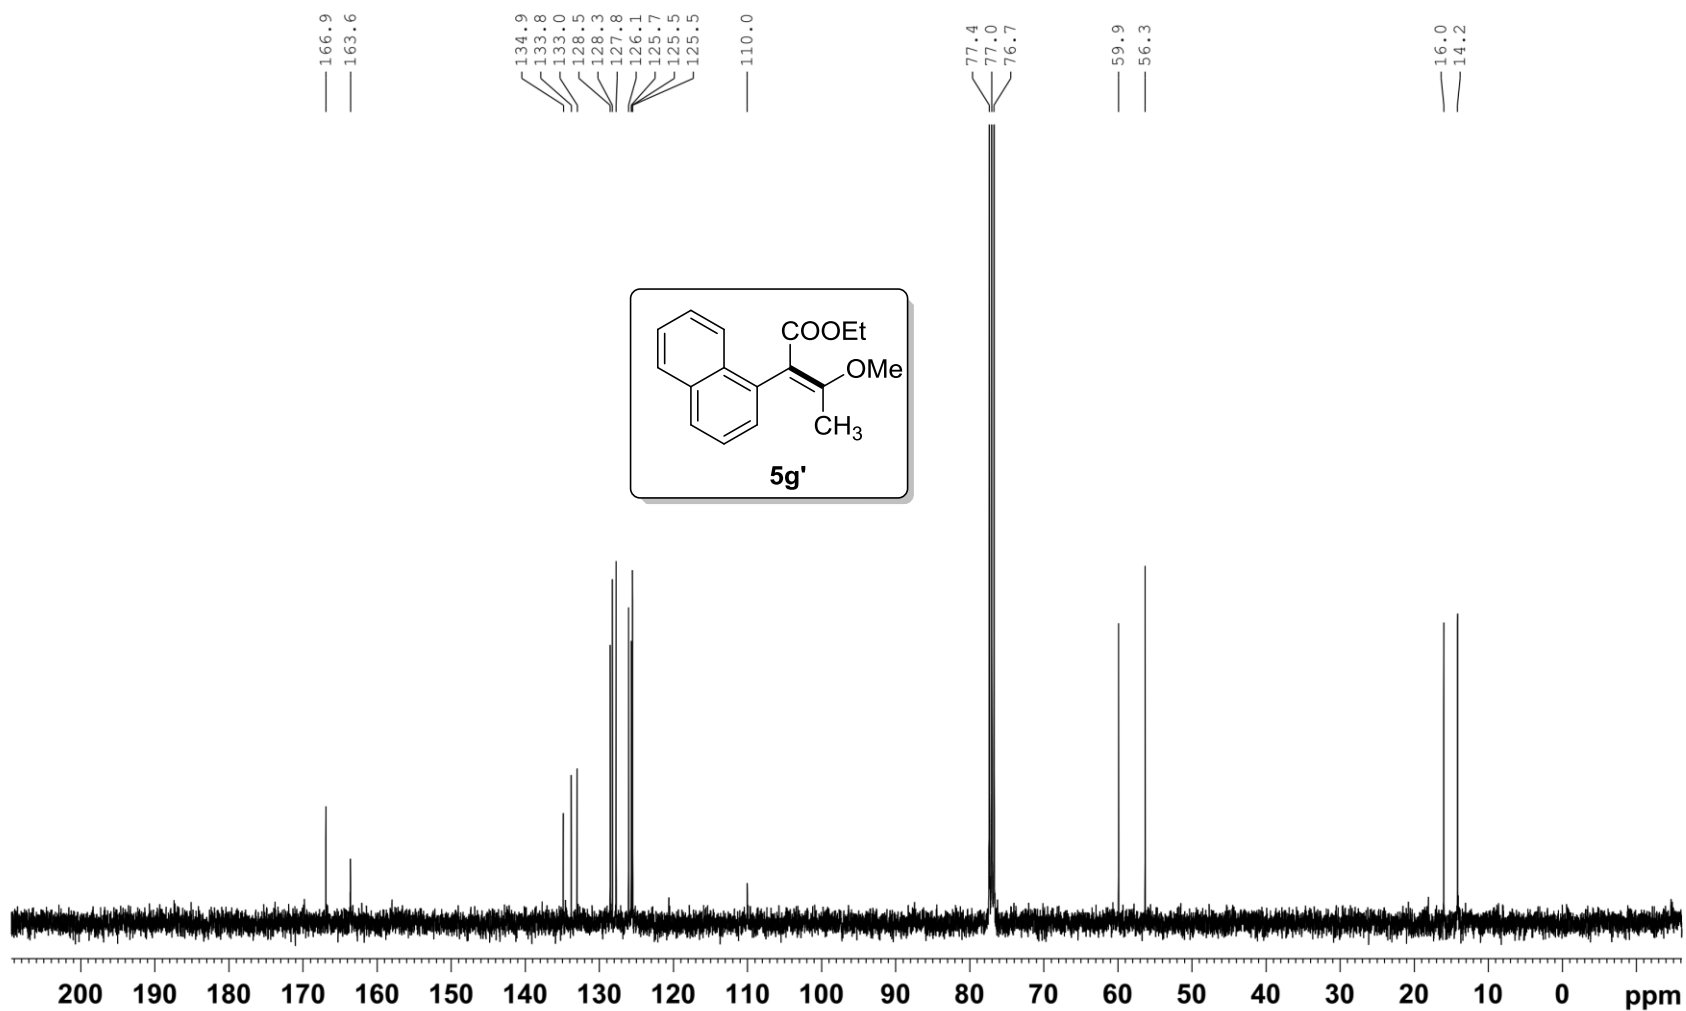

LJW-X170703-22-HNMR

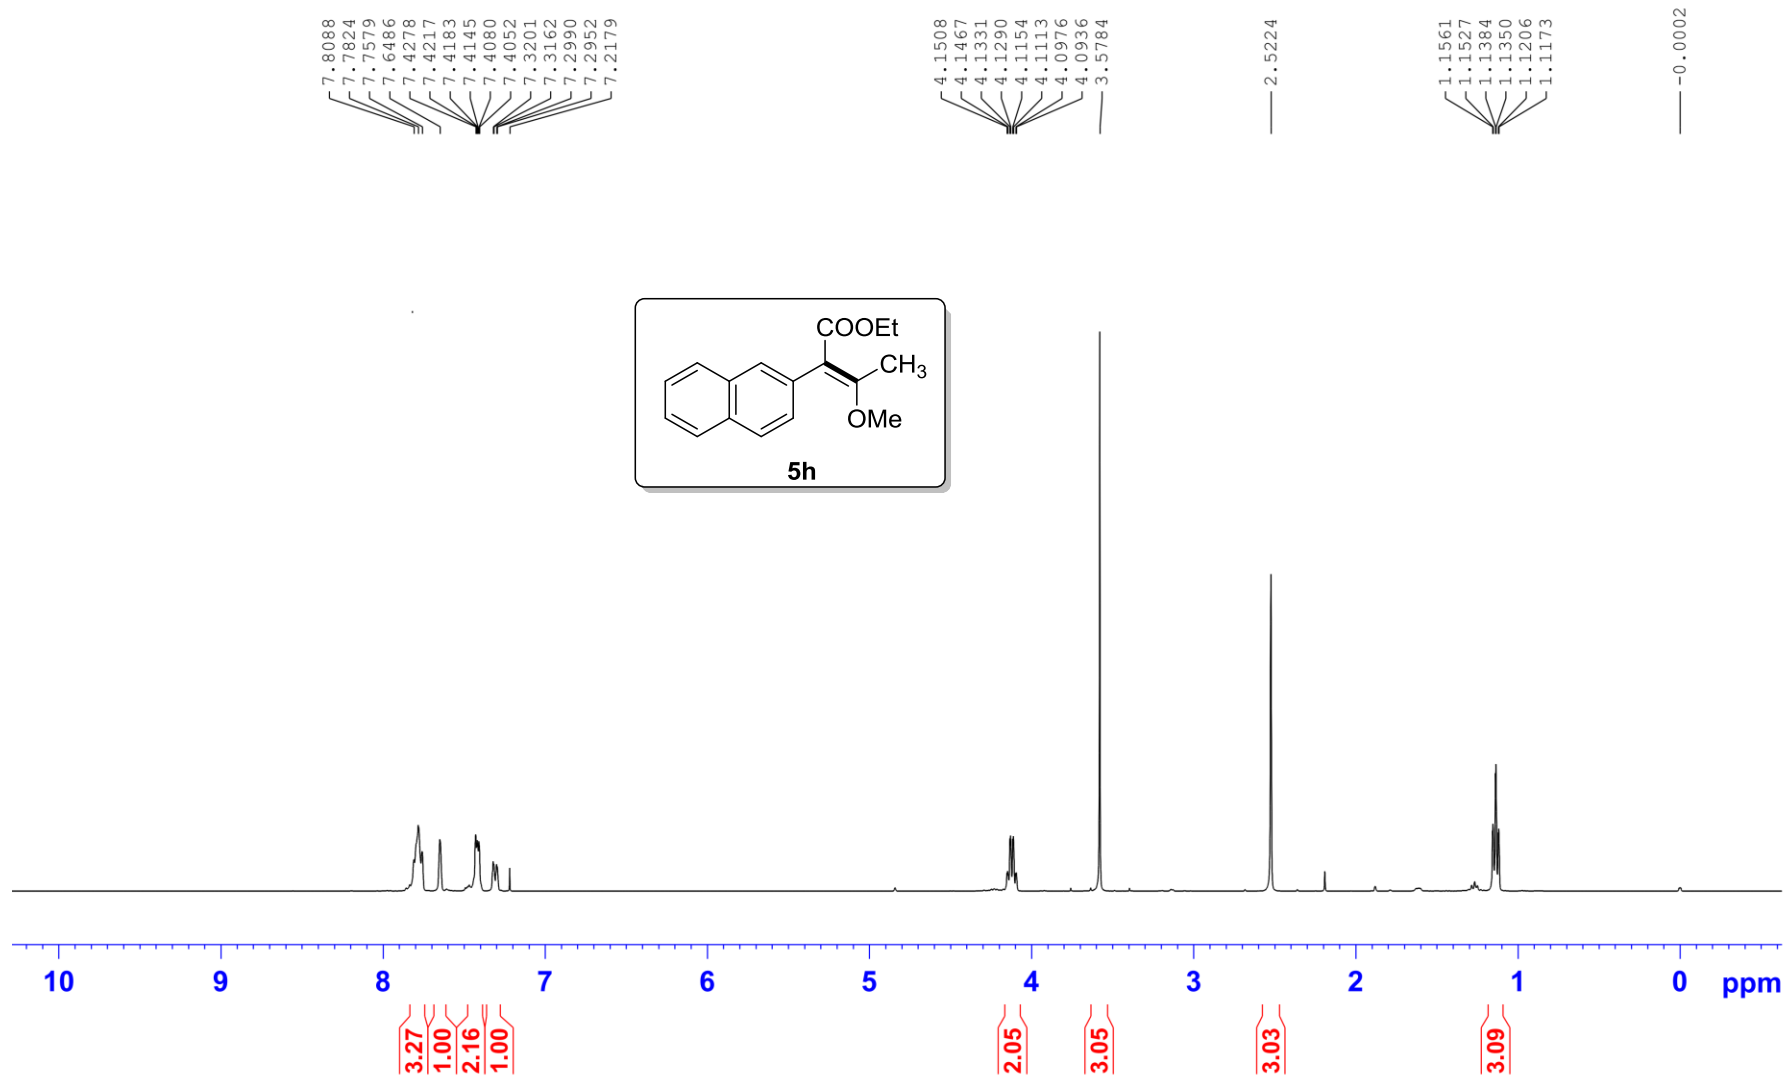

LJW-X170703-22-CNMR

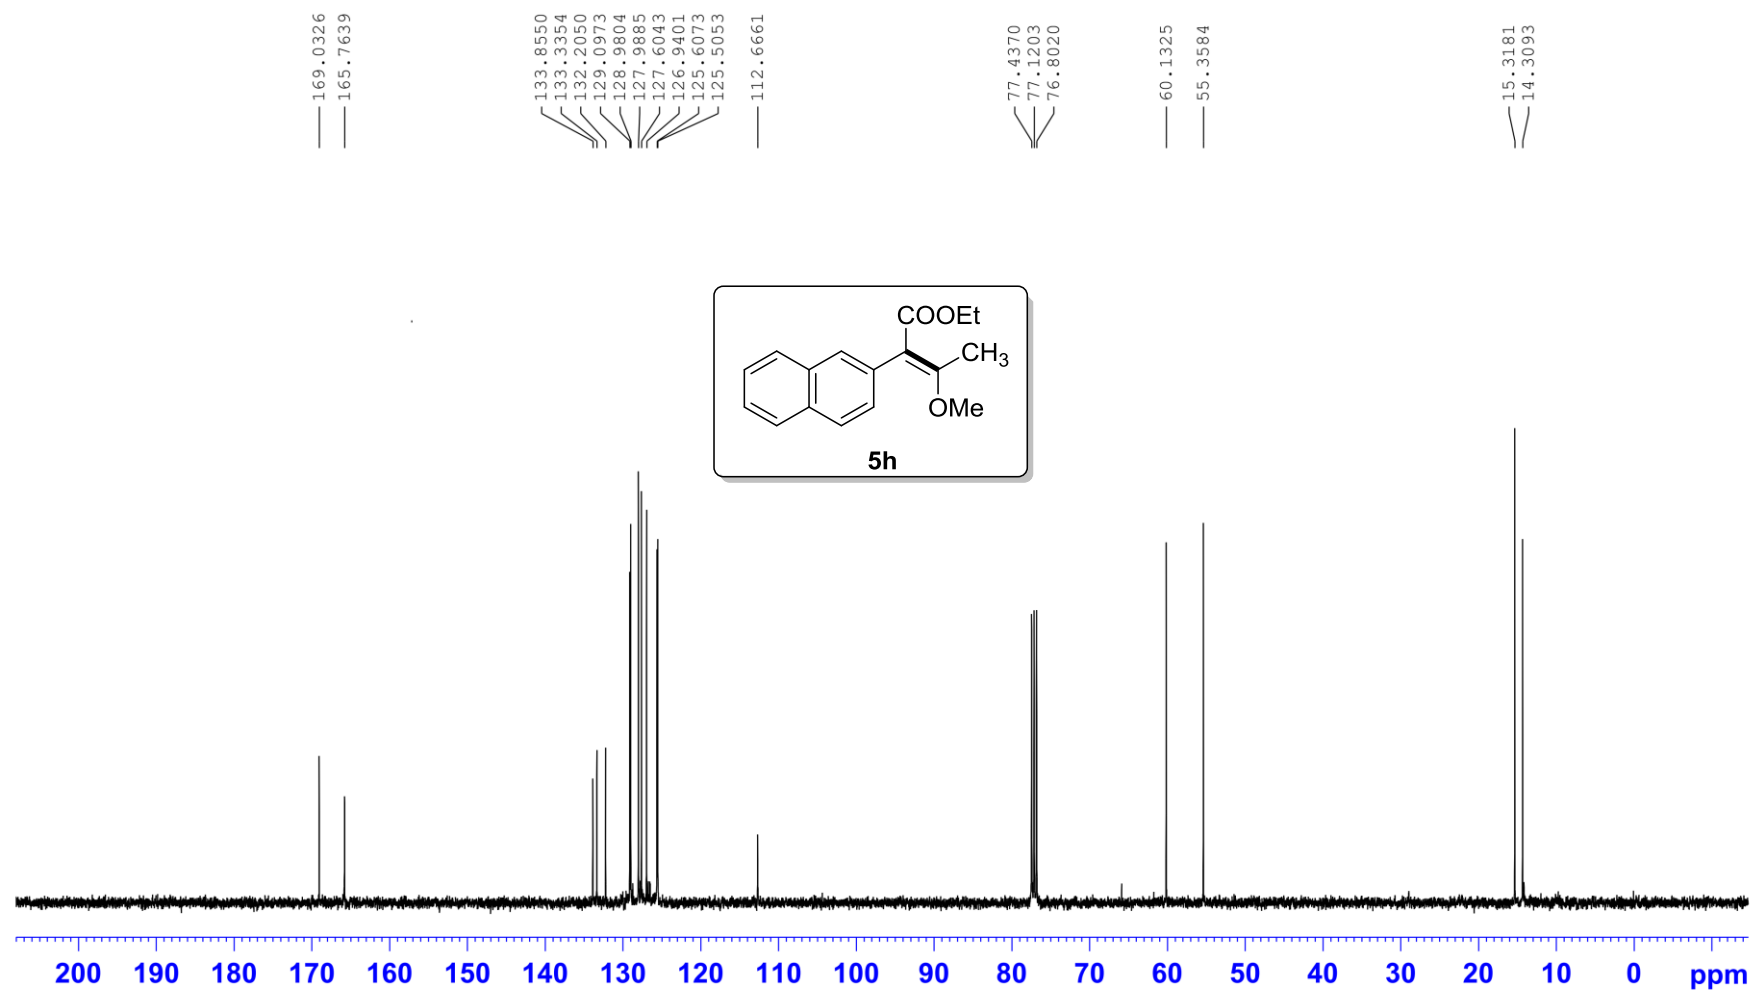

LJW-X170703-23-HNMR

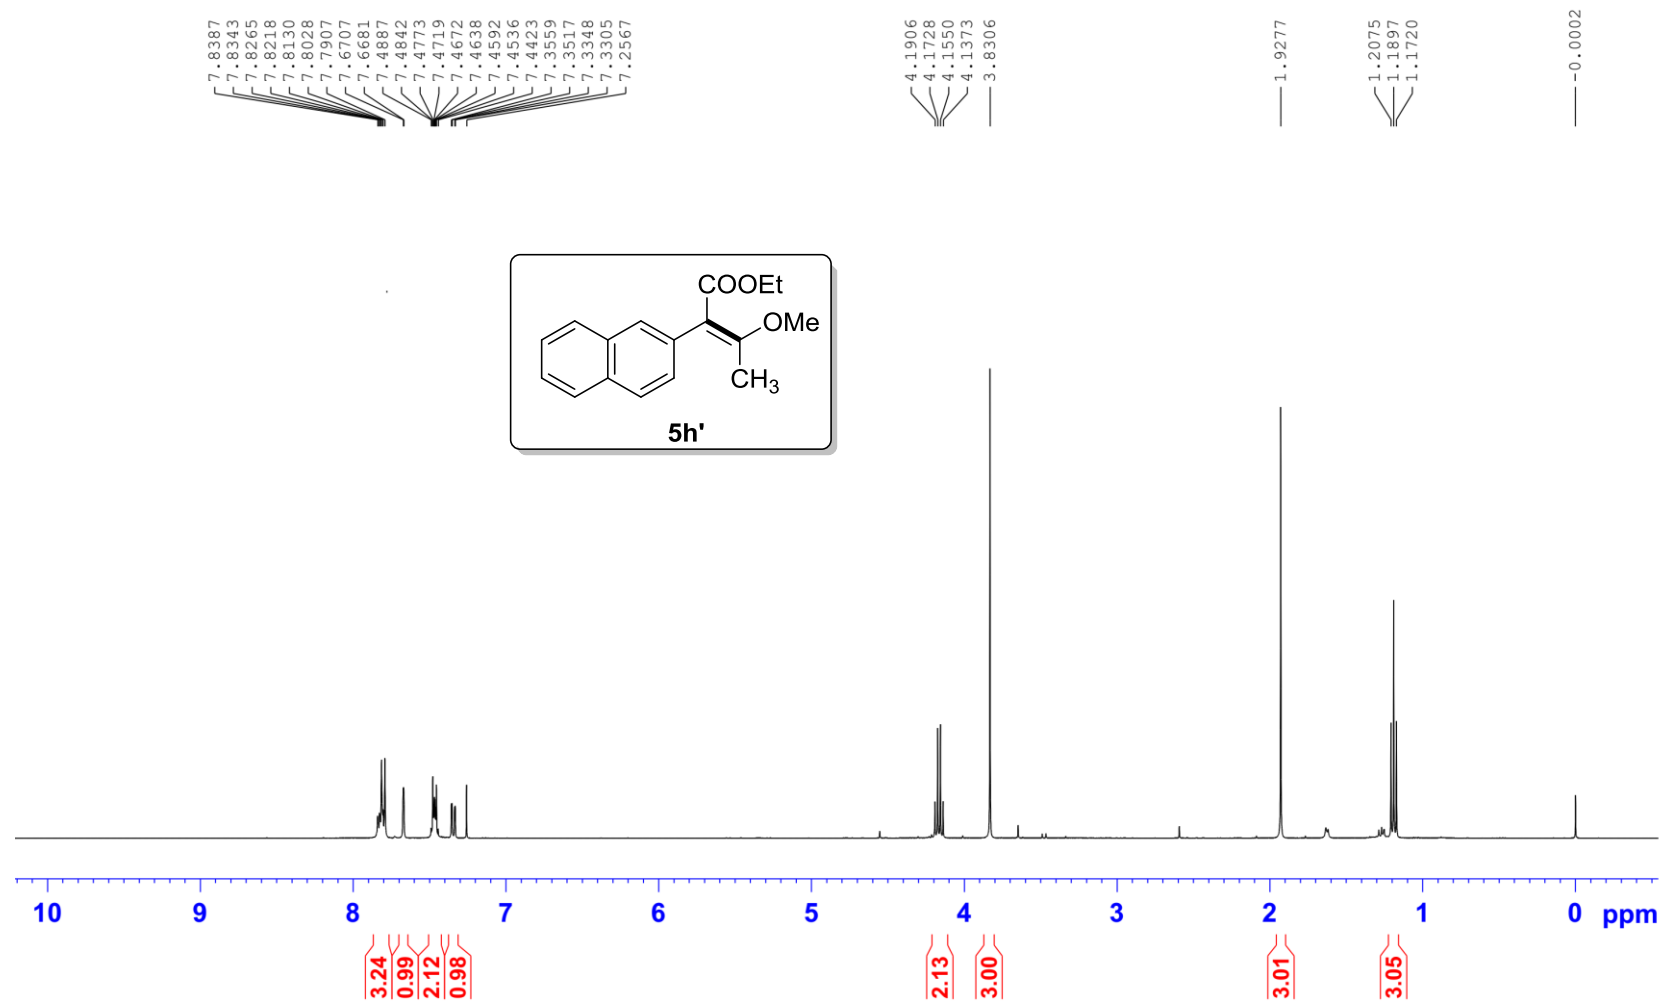

LJW-X180319-5-CNMR

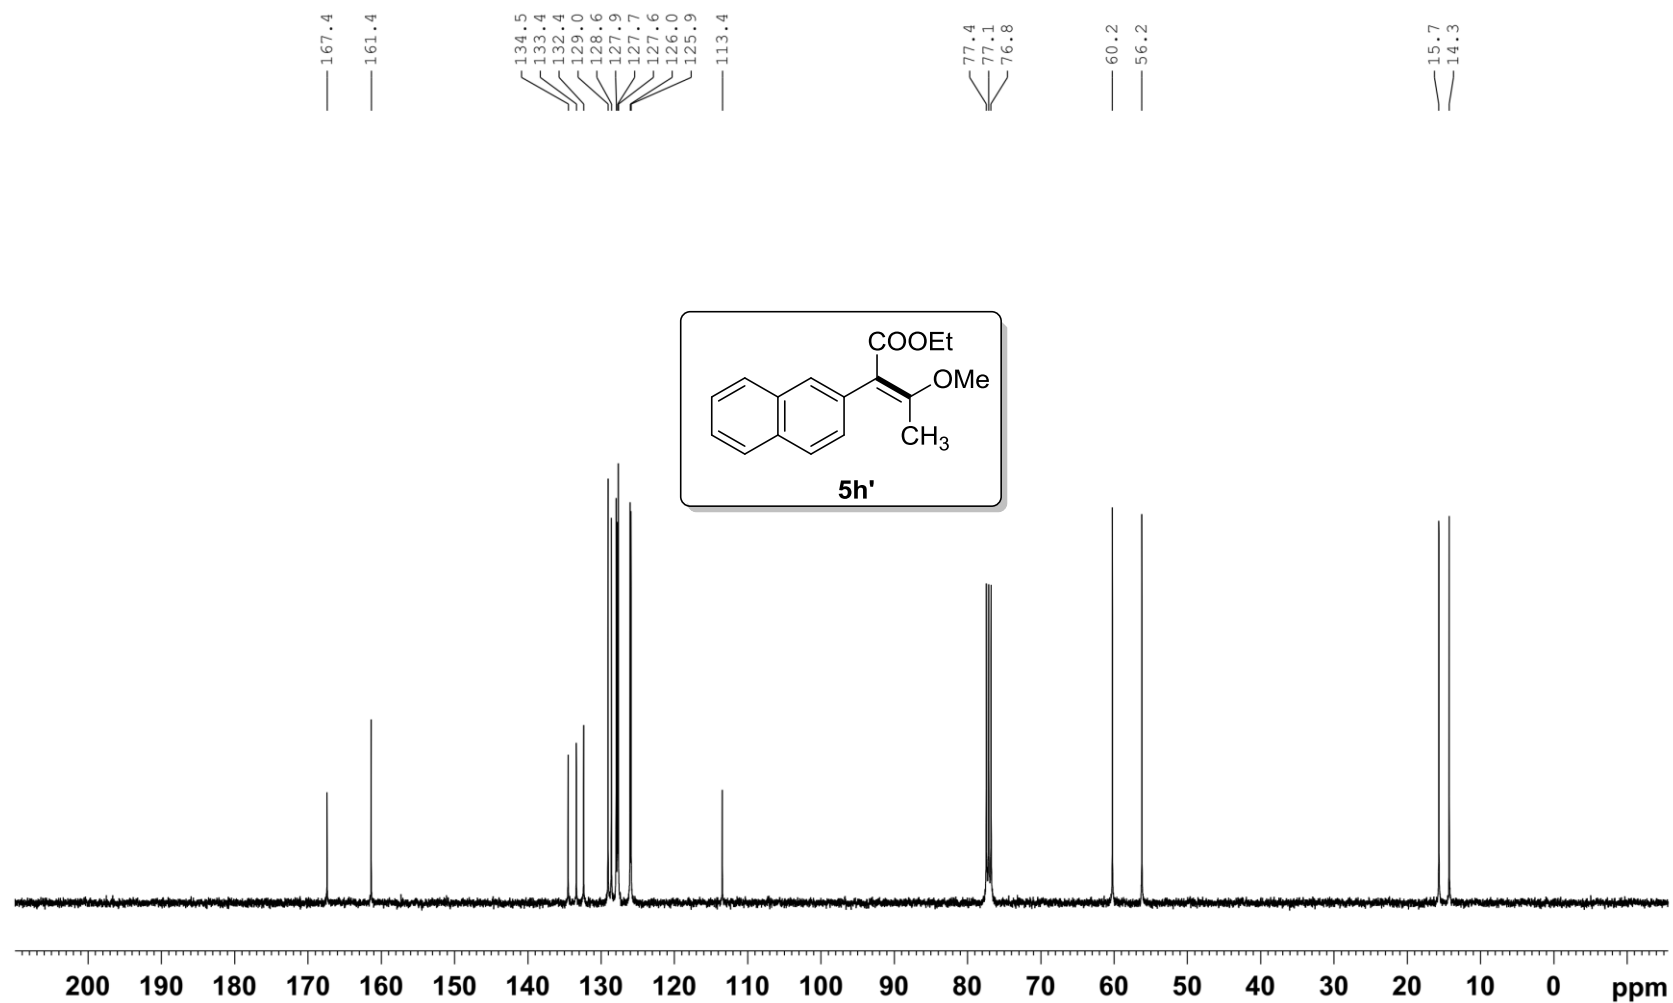

LJW-X170703-24-HNMR

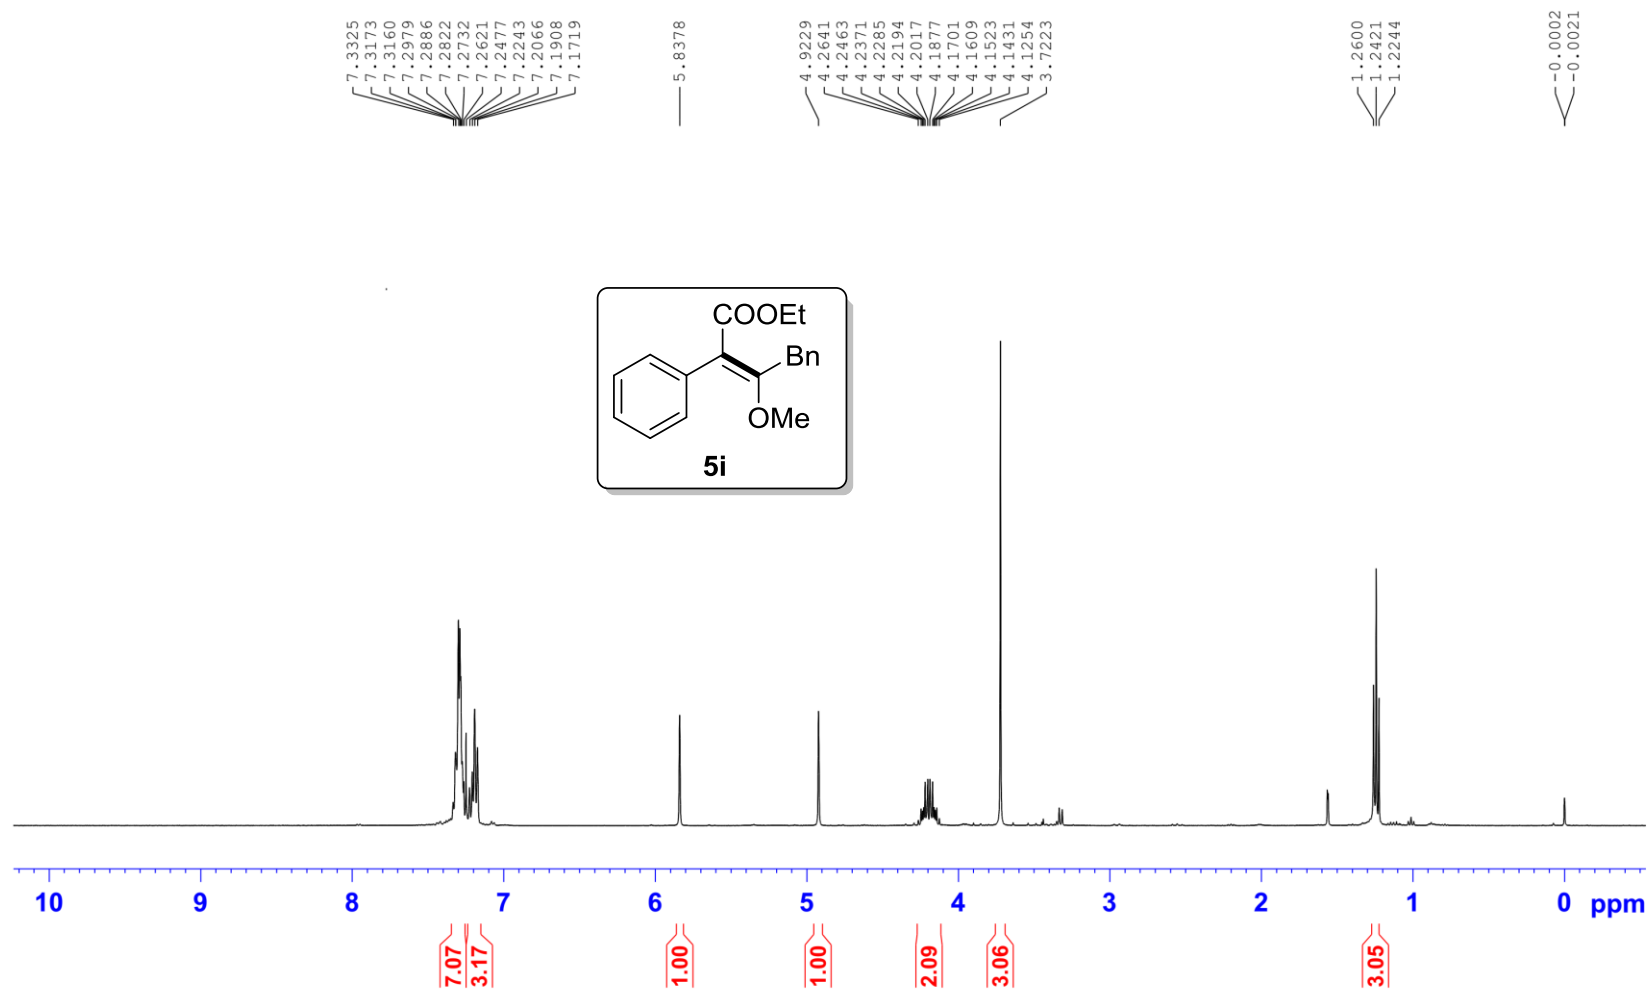

LJW-X170703-24-CNMR

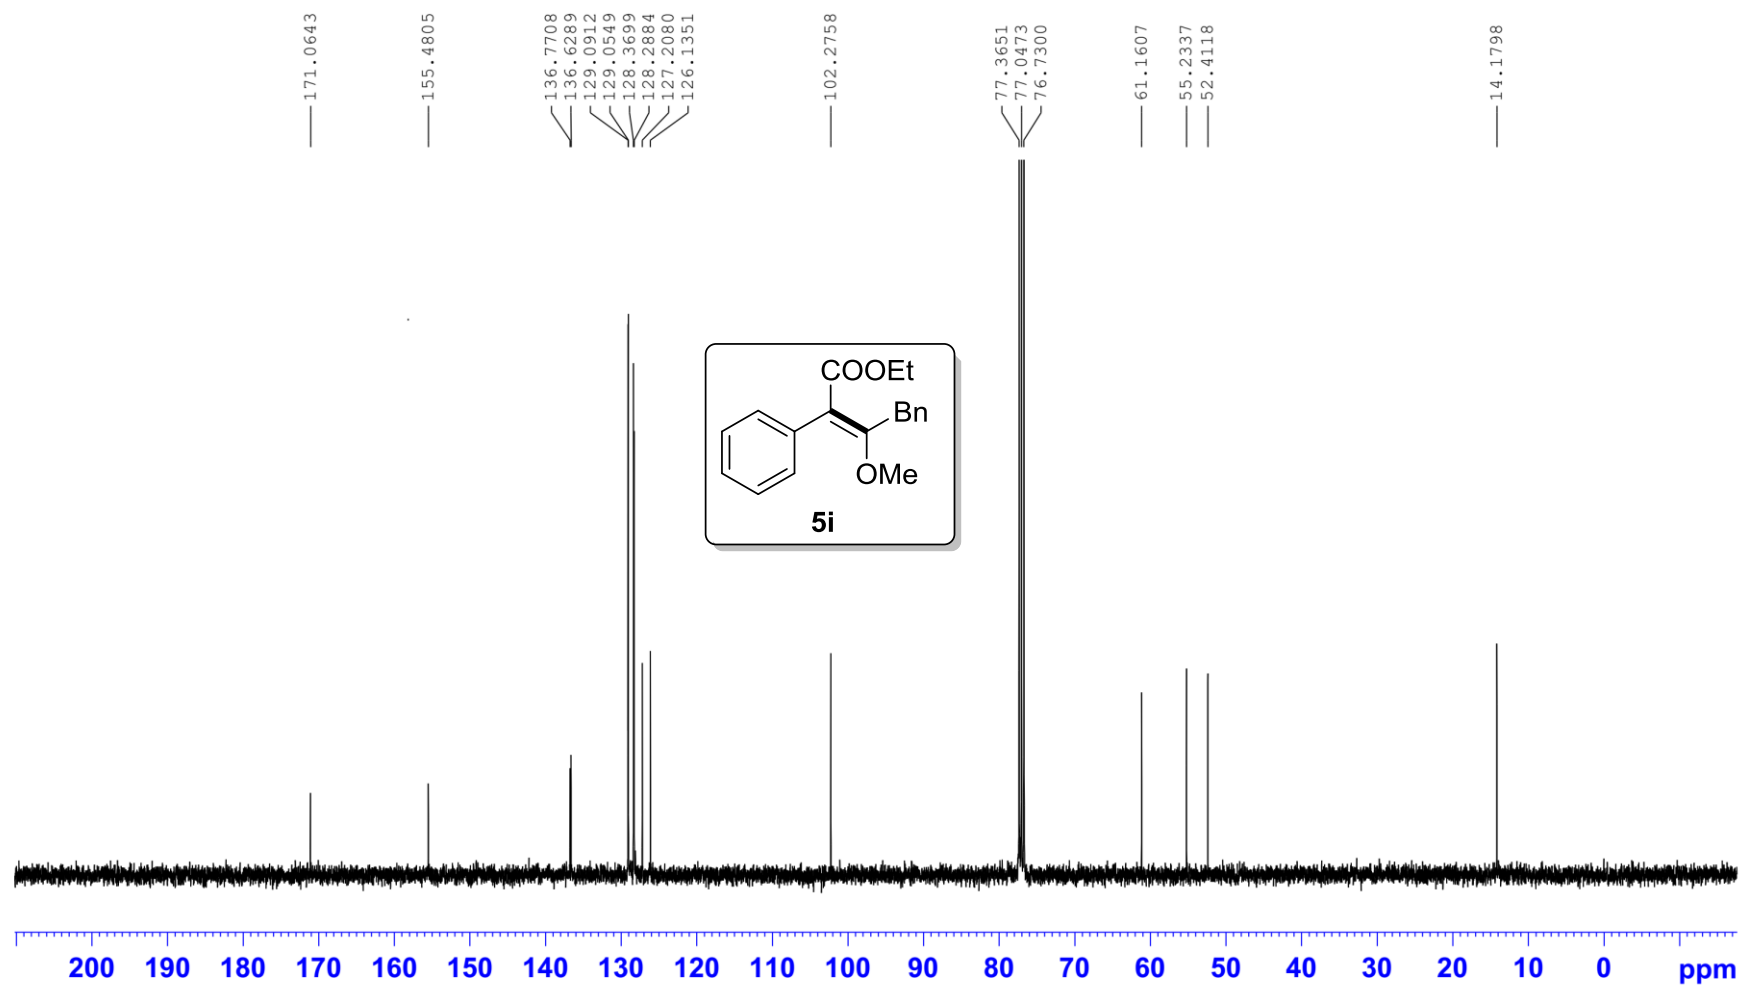

LJW-X180608-2-HNMR

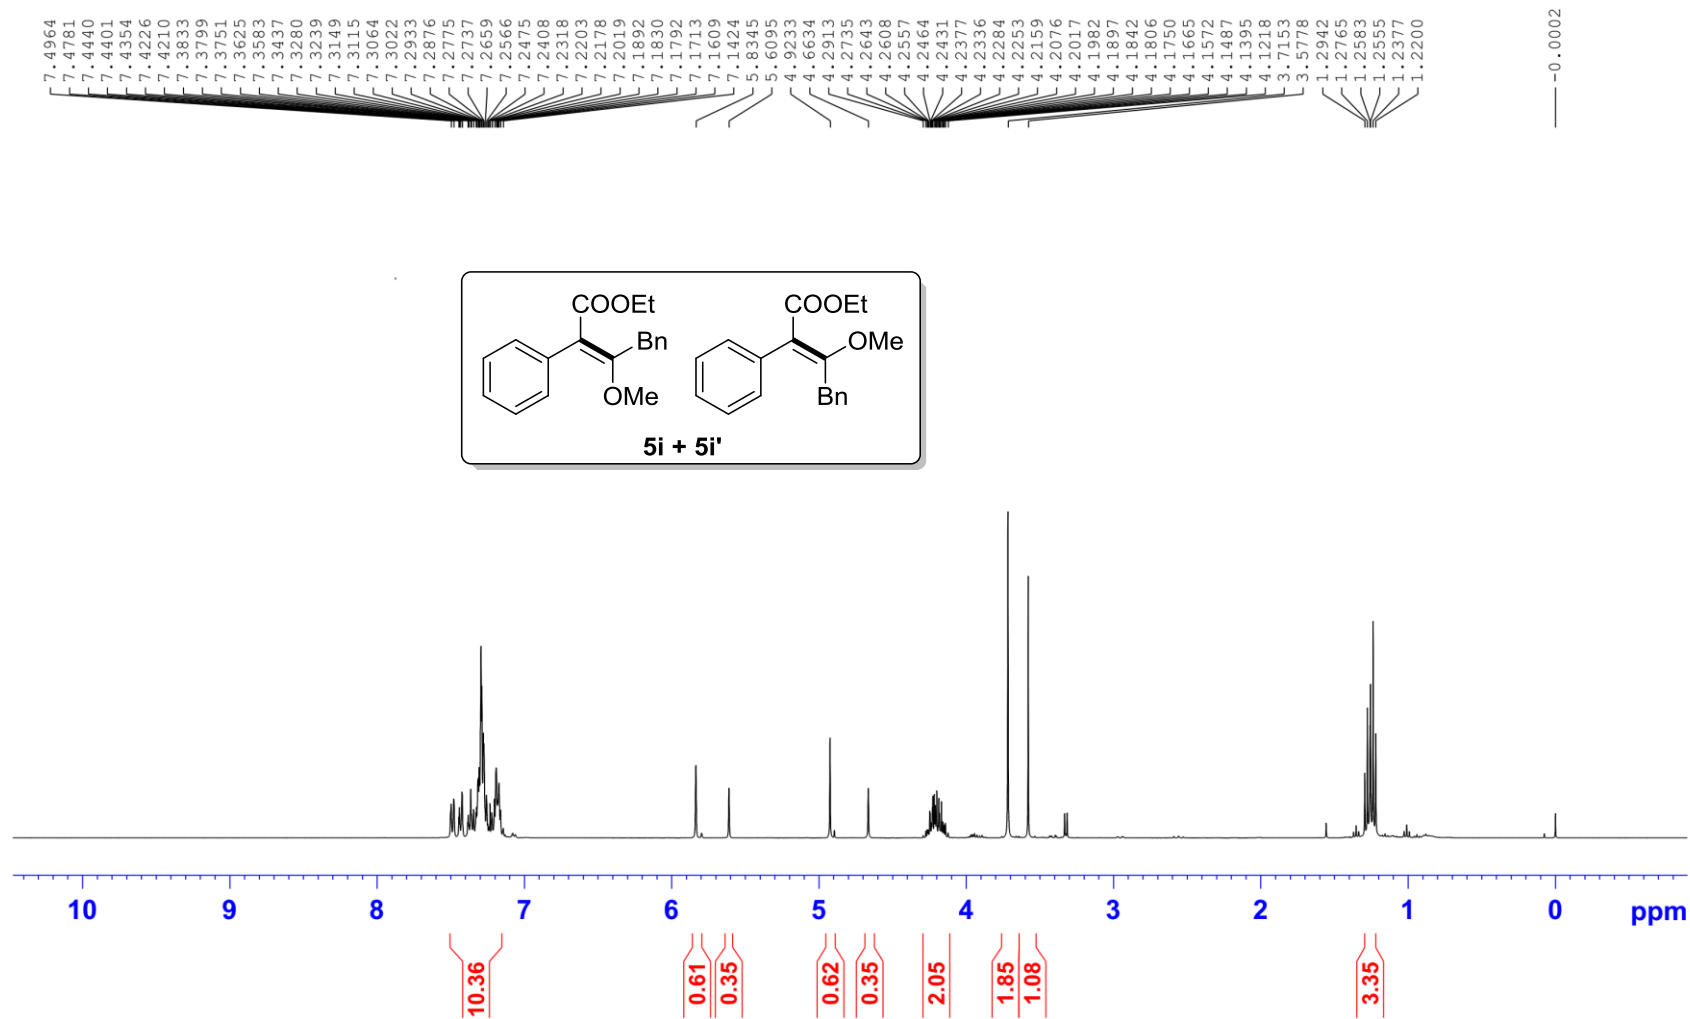

LJW-X180608-2-CNMR

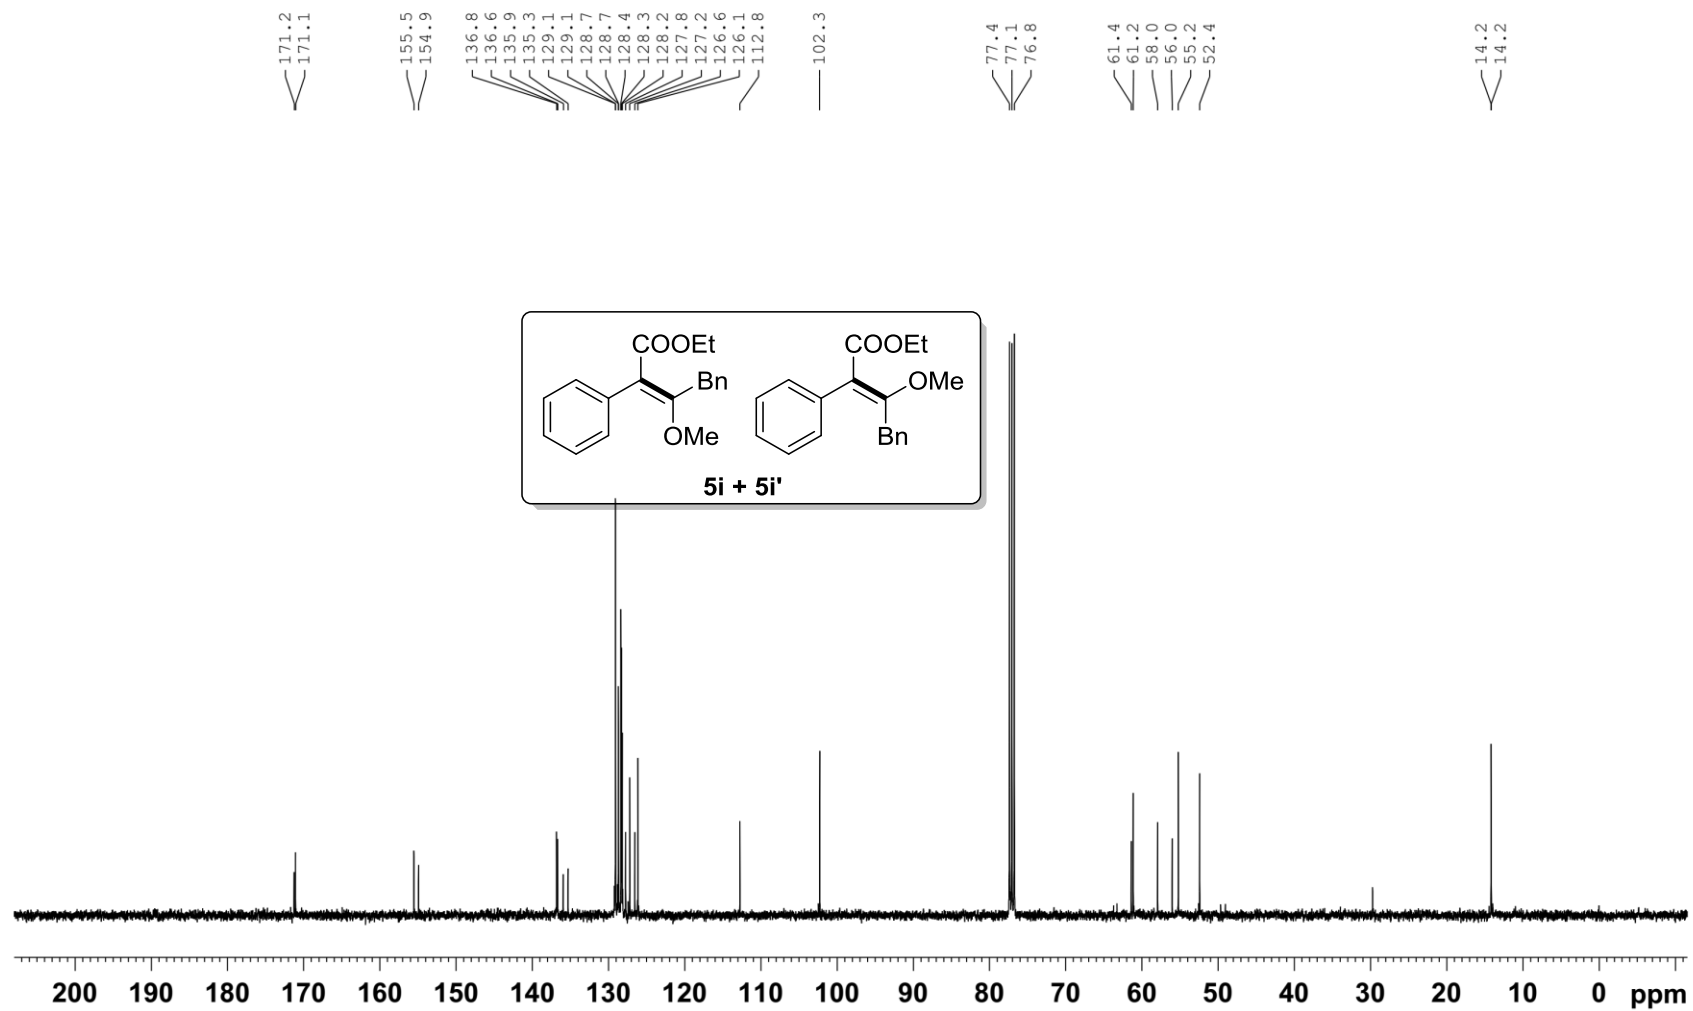

LJW-X170531-1-HNMR

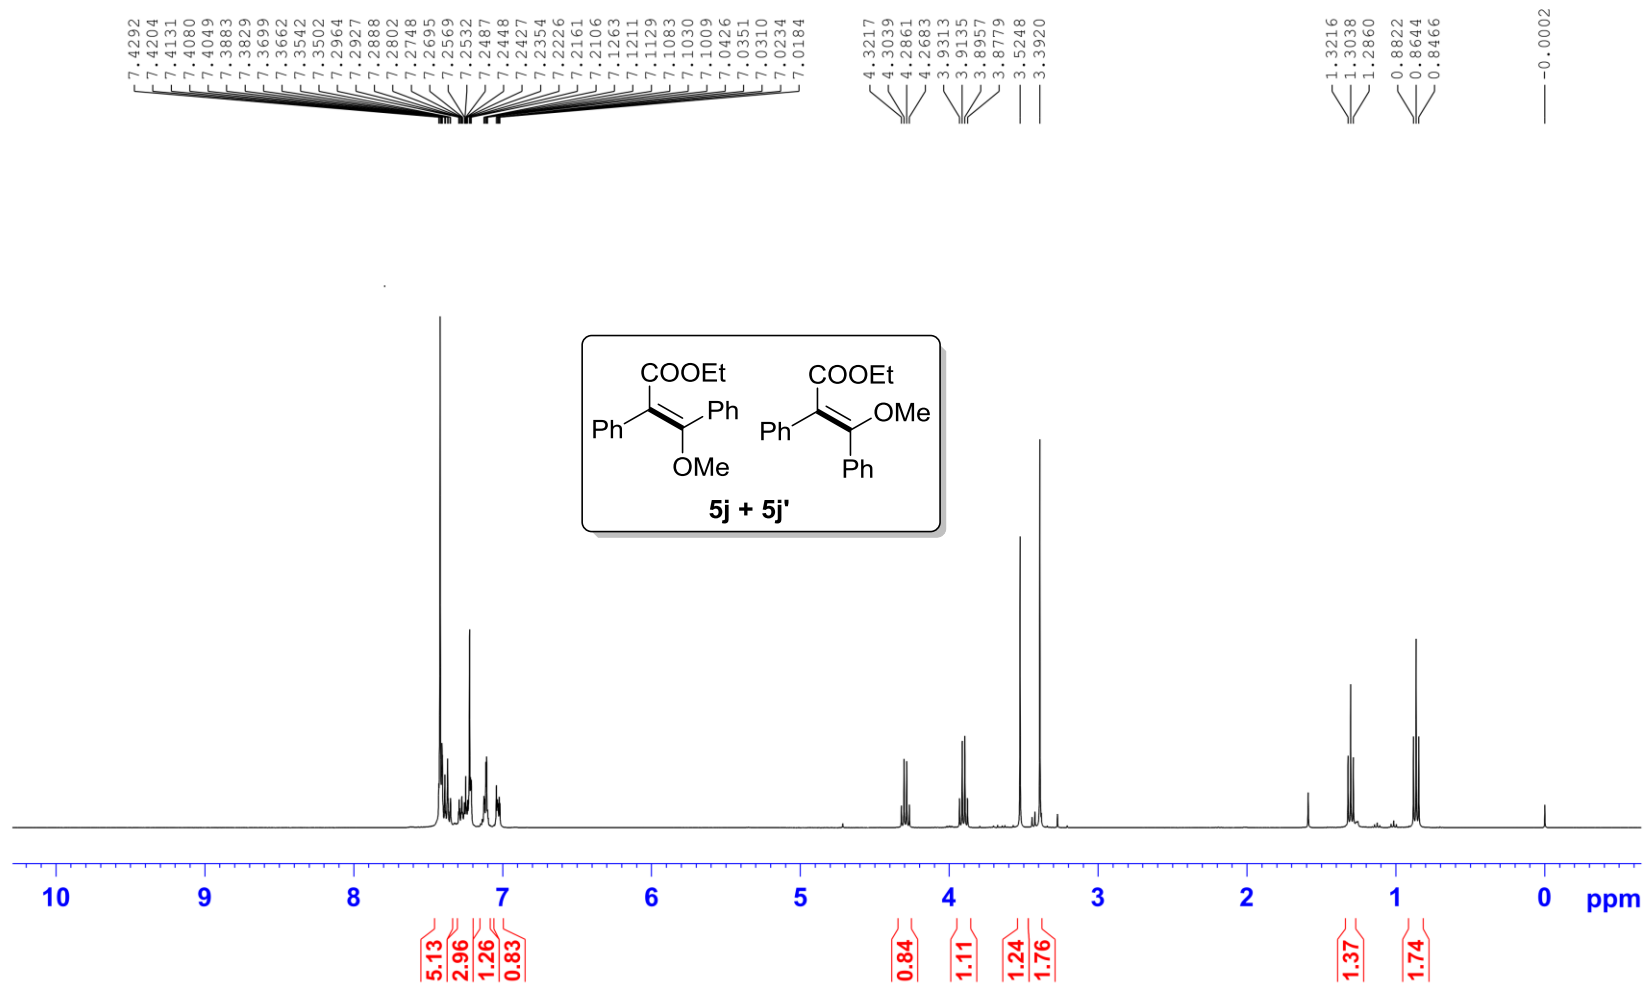

LJW-X170531-1-CNMR

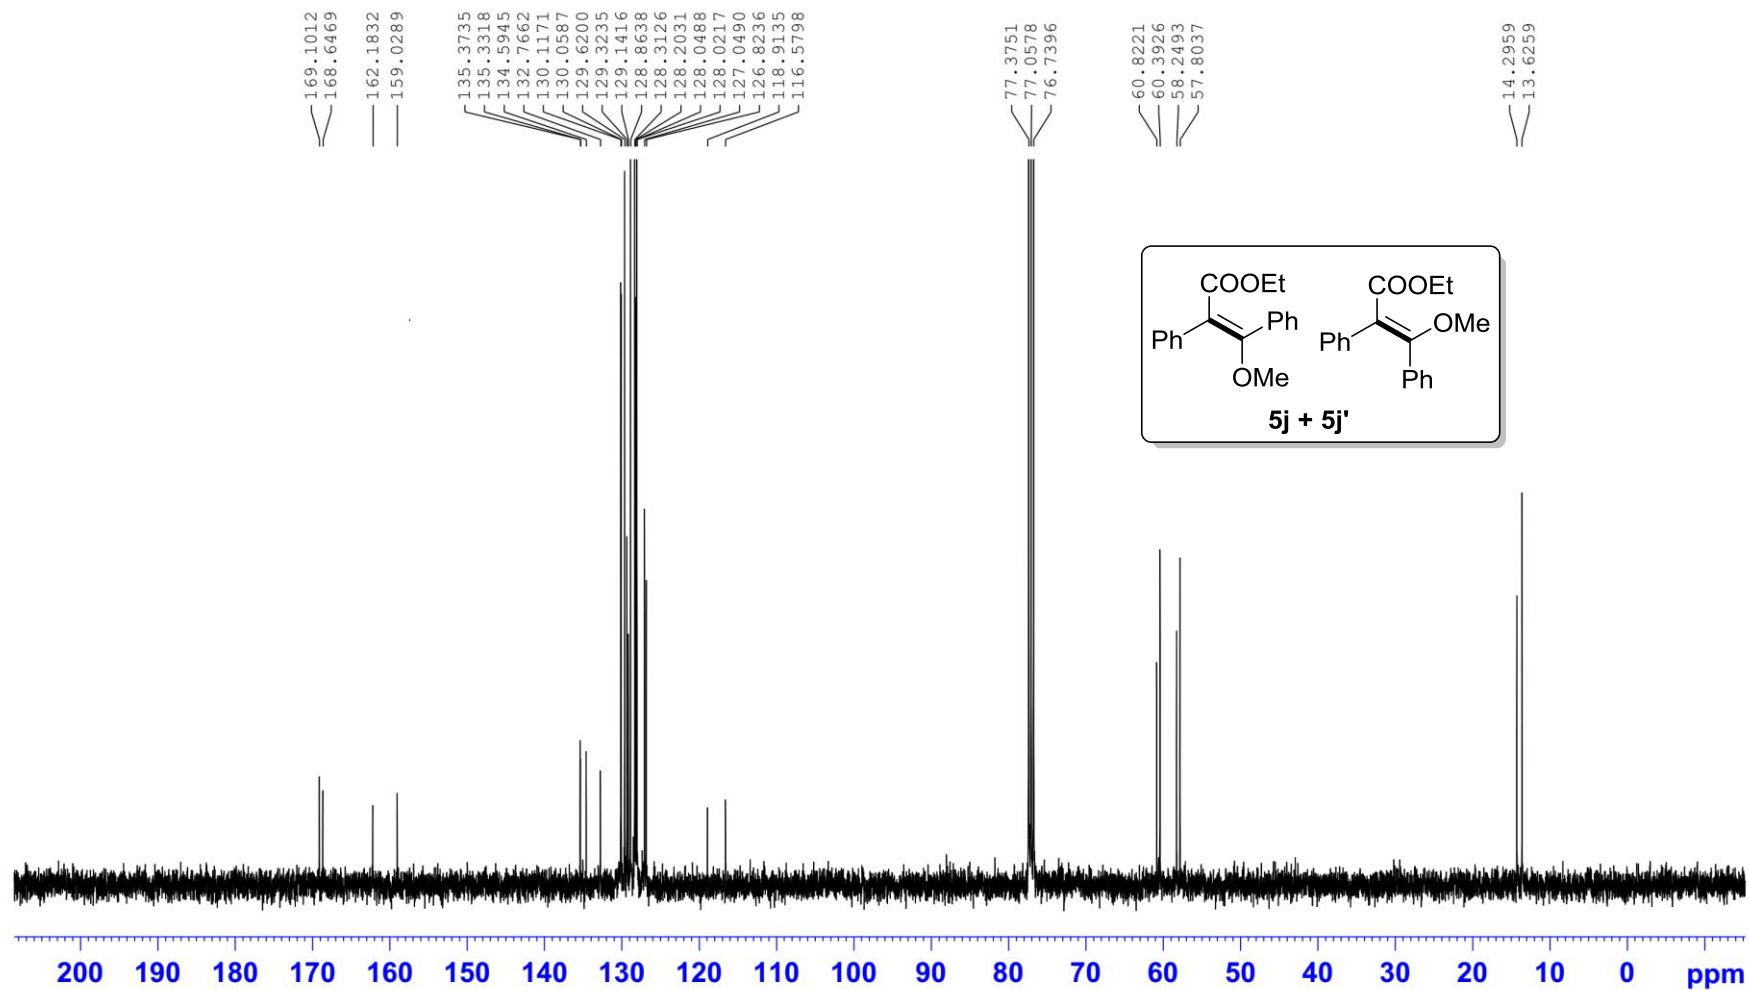

LJW-X180911-3-HNMR

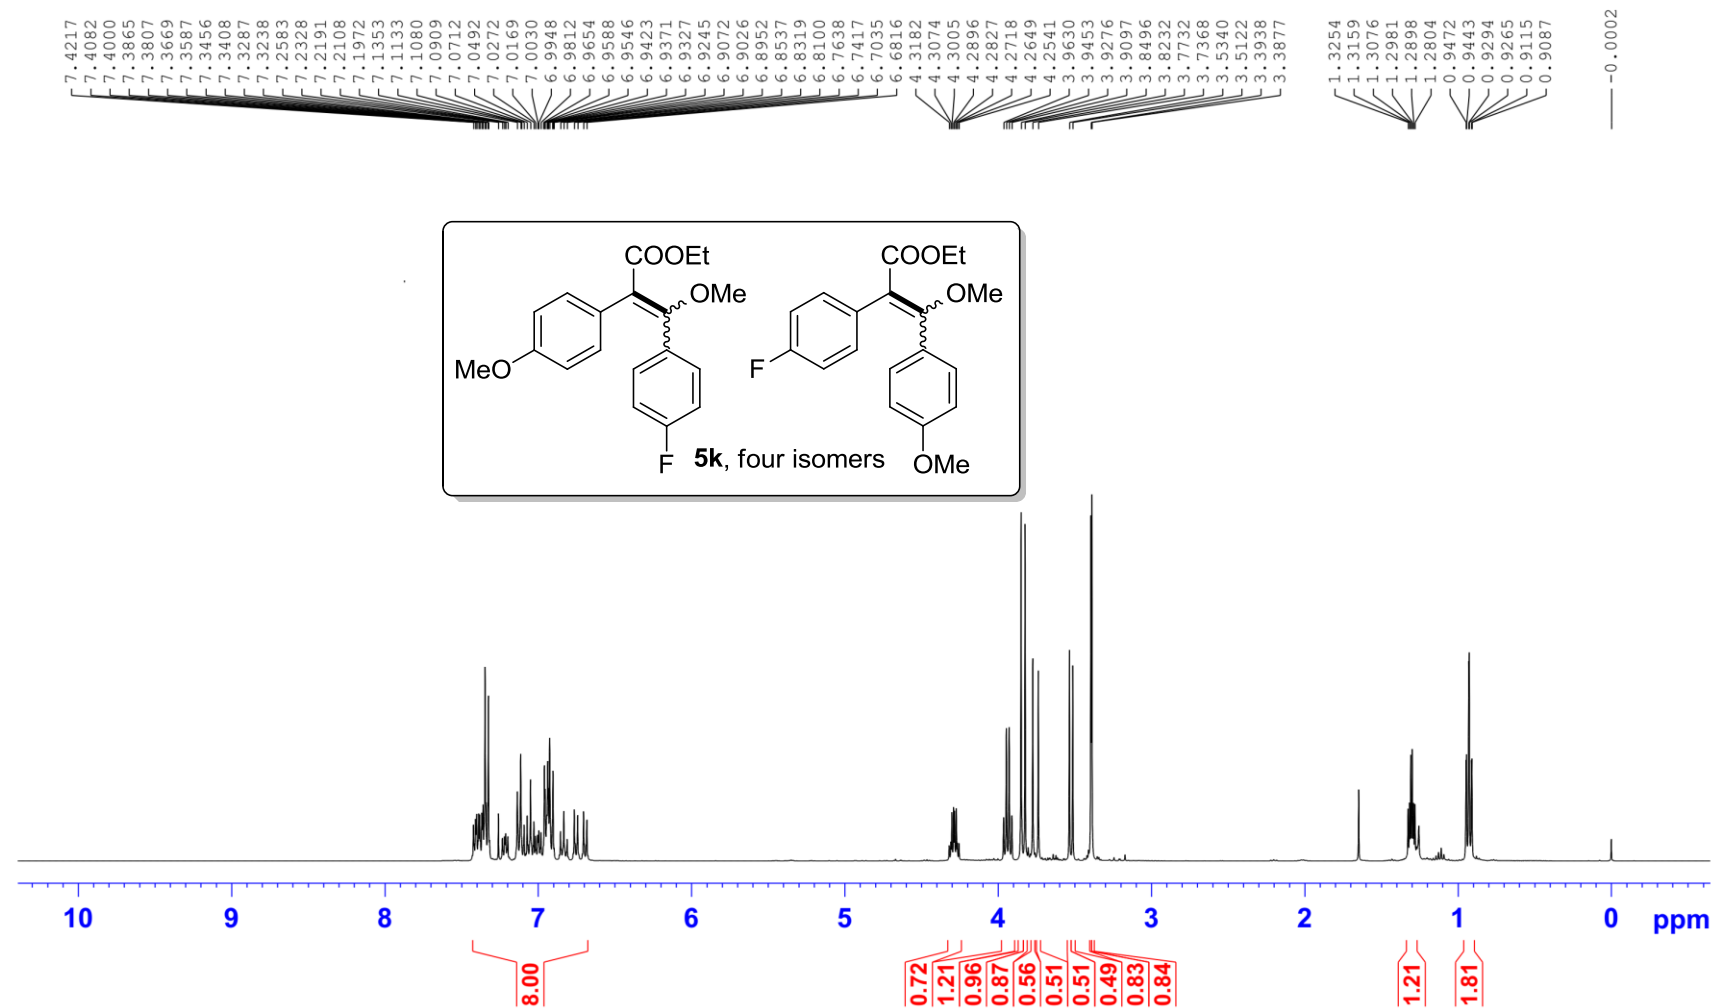

LJW-X180911-3-CNMR

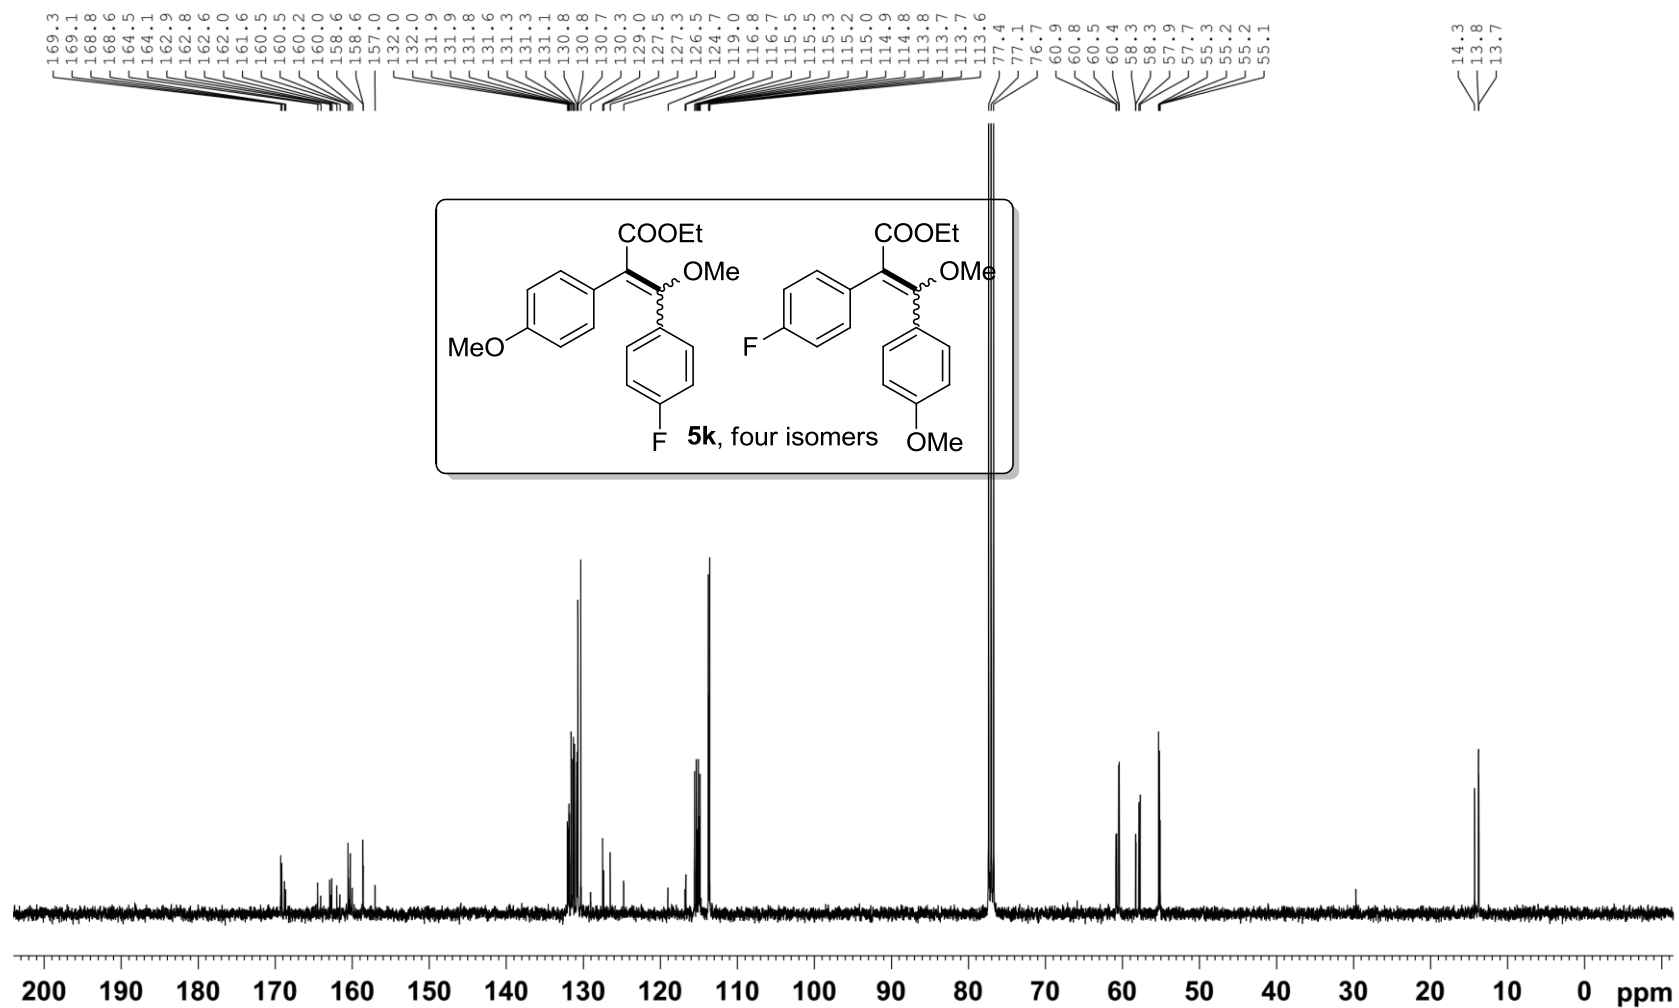

LJW-X180911-1-FNMR

-111.2  
-111.3  
-115.4  
-115.4

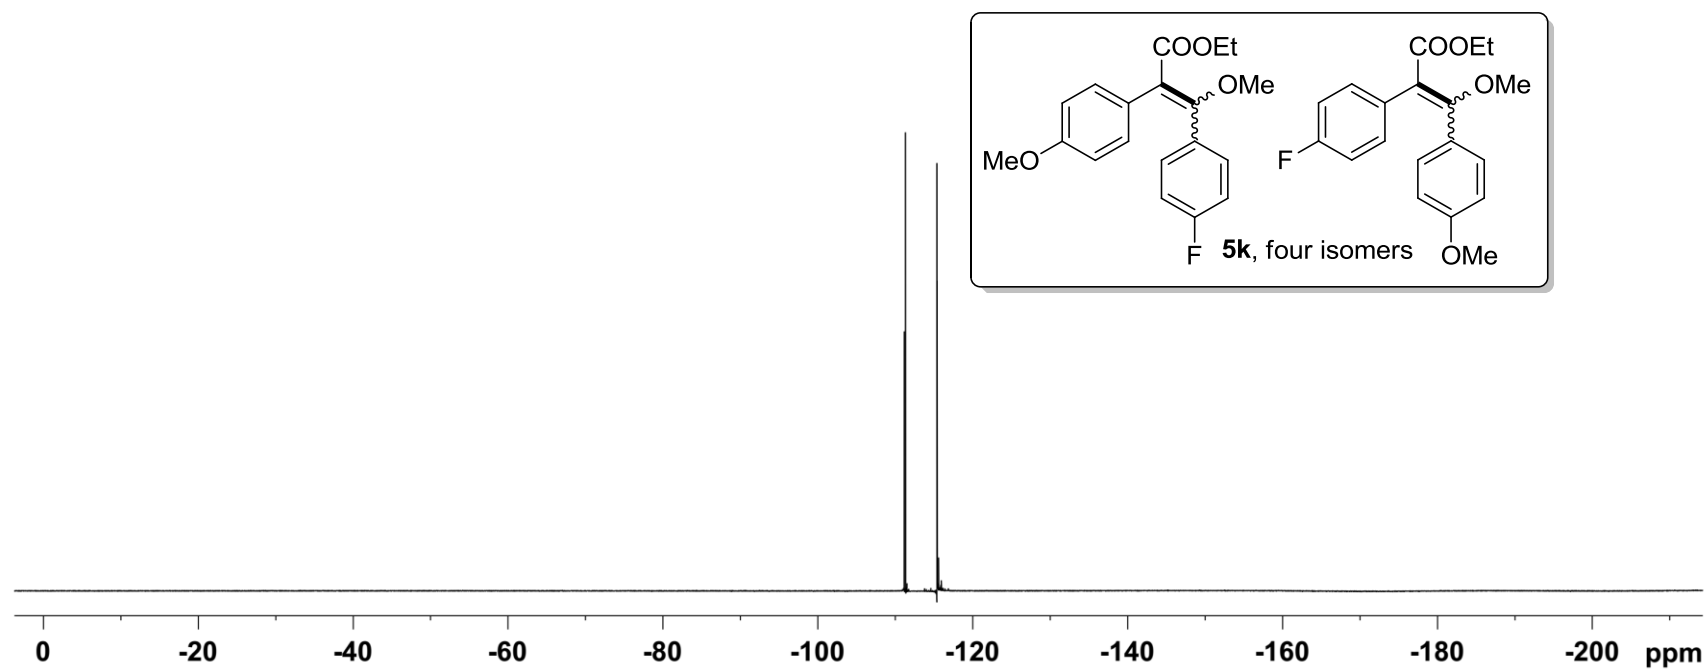

LJW-X170703-30-HNMR

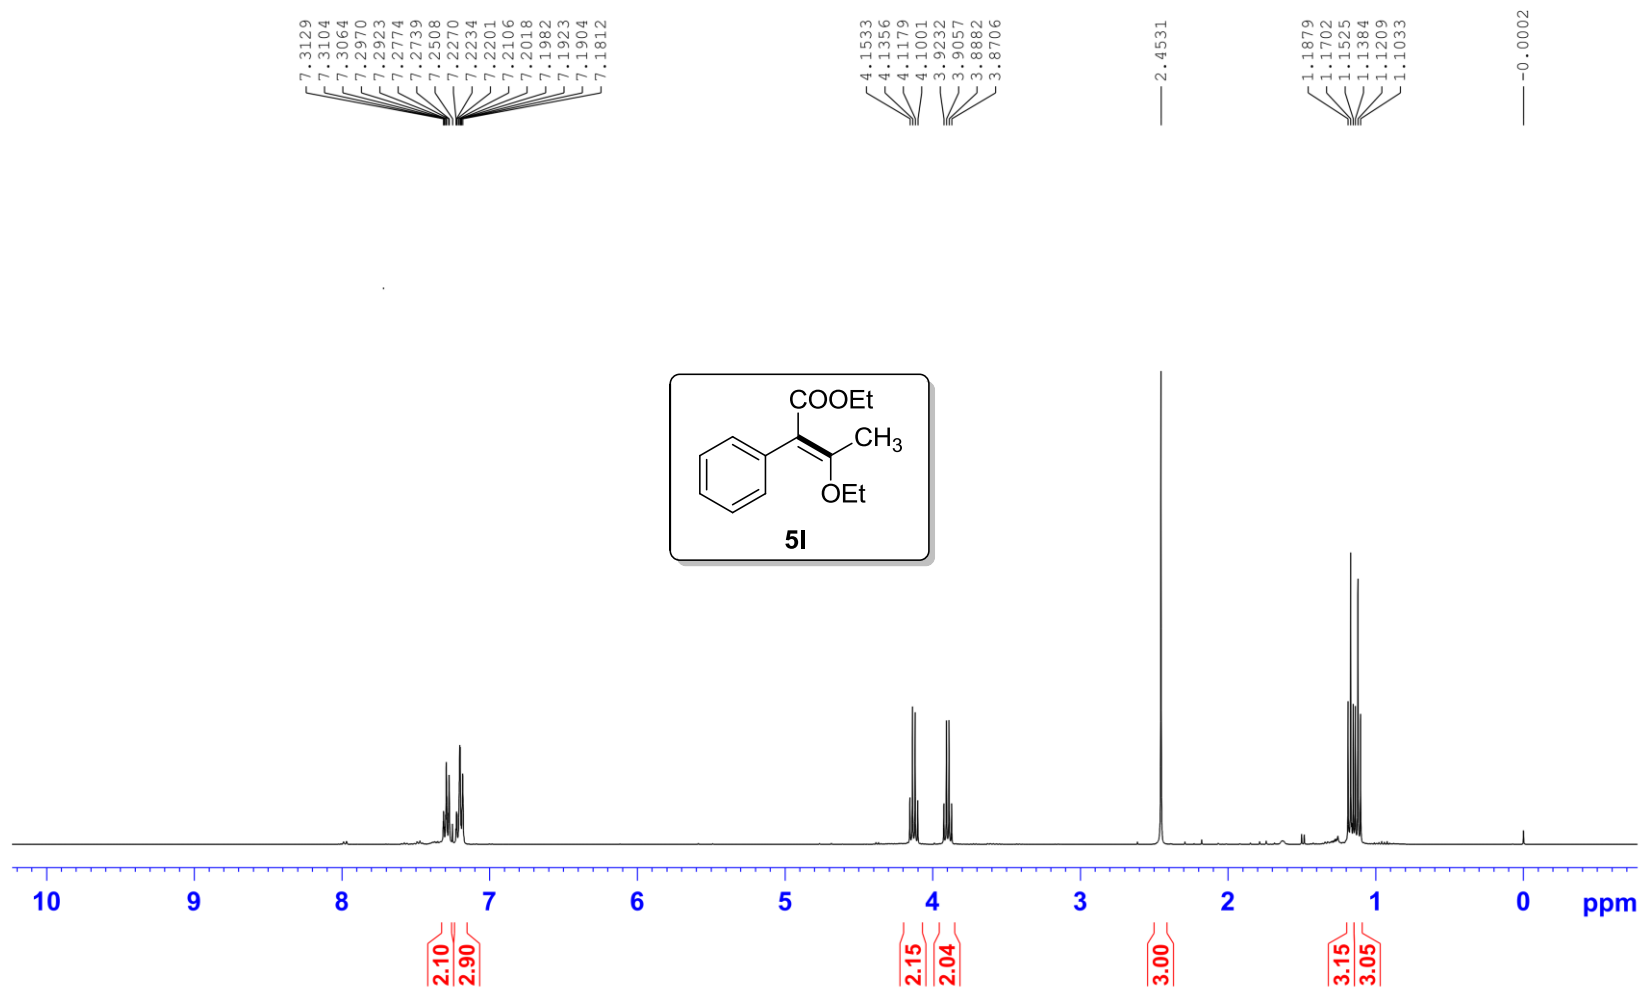

LJW-X170703-30-CNMR

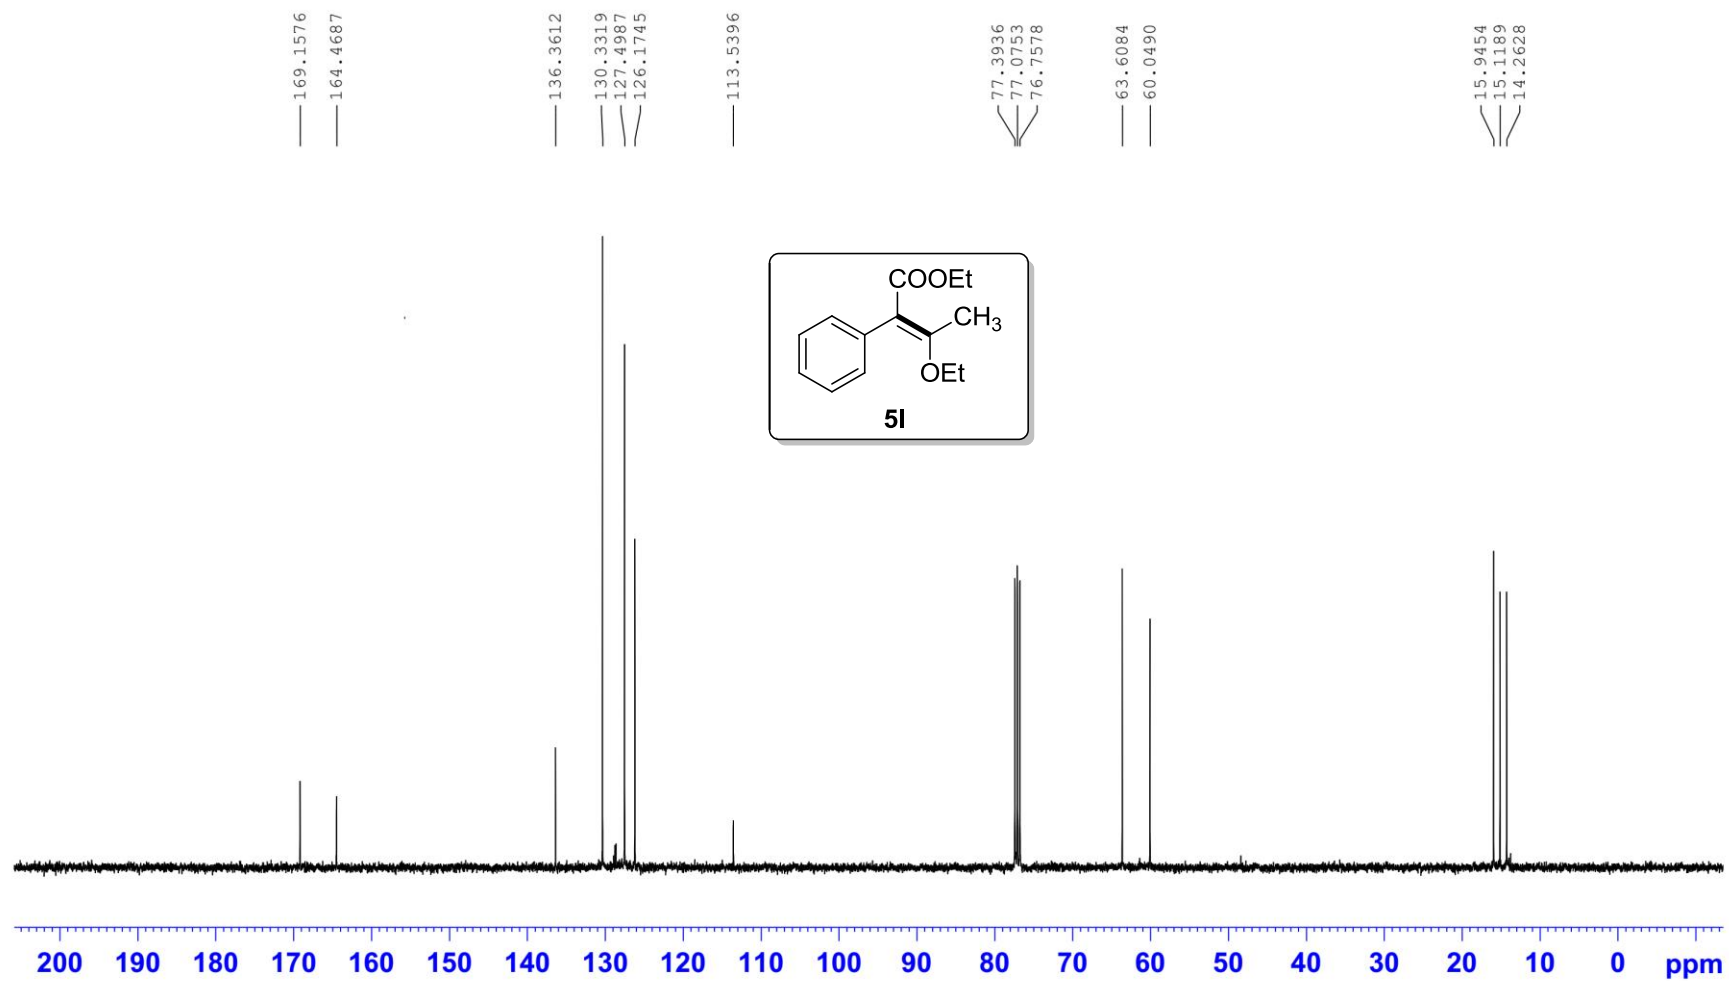

LJW-X170706-2-HNMR

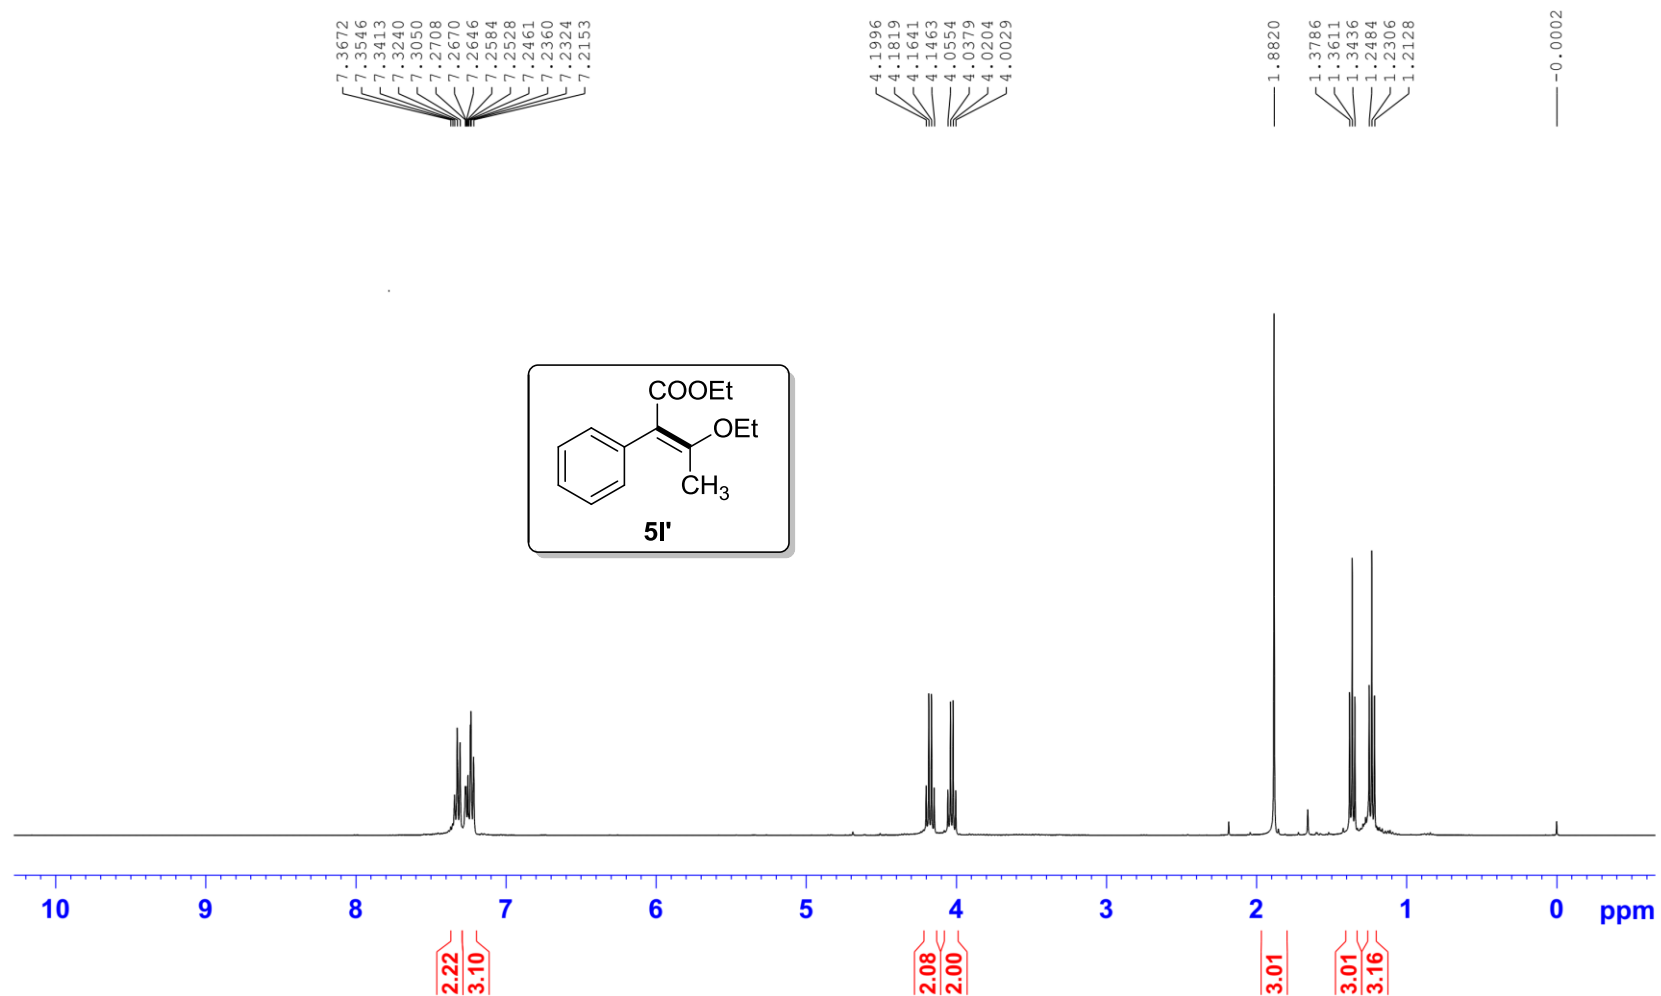

LJW-X170706-2-CNMR

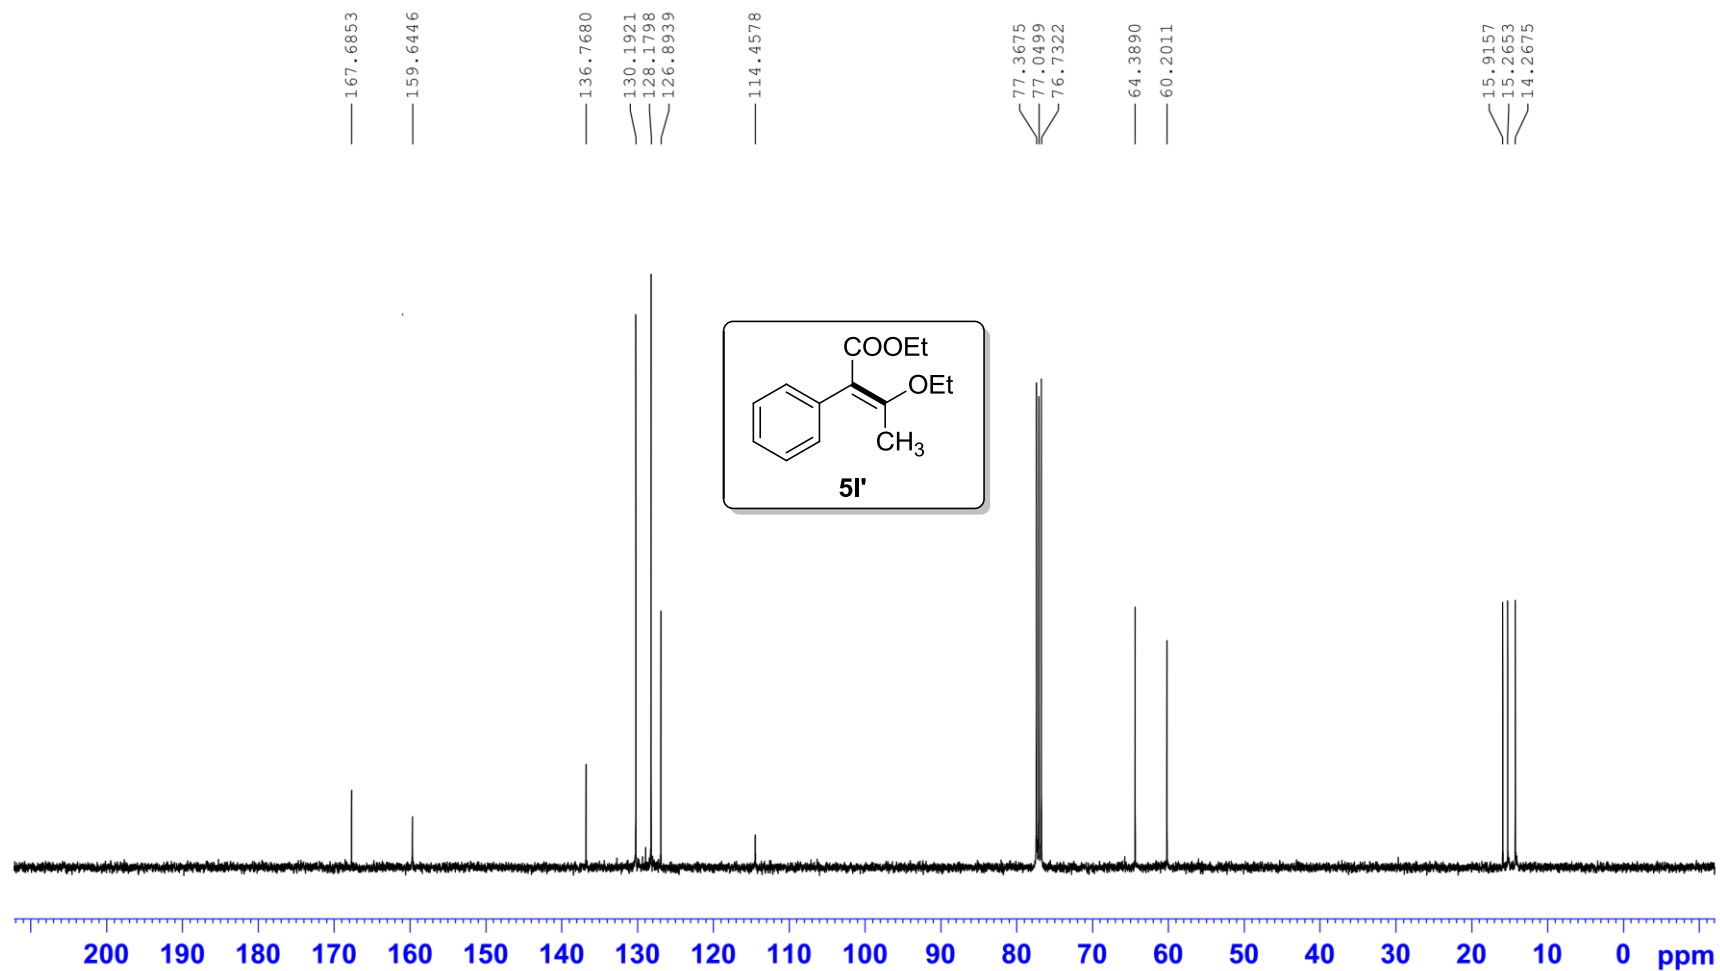

LJW-X170703-36-HNMR

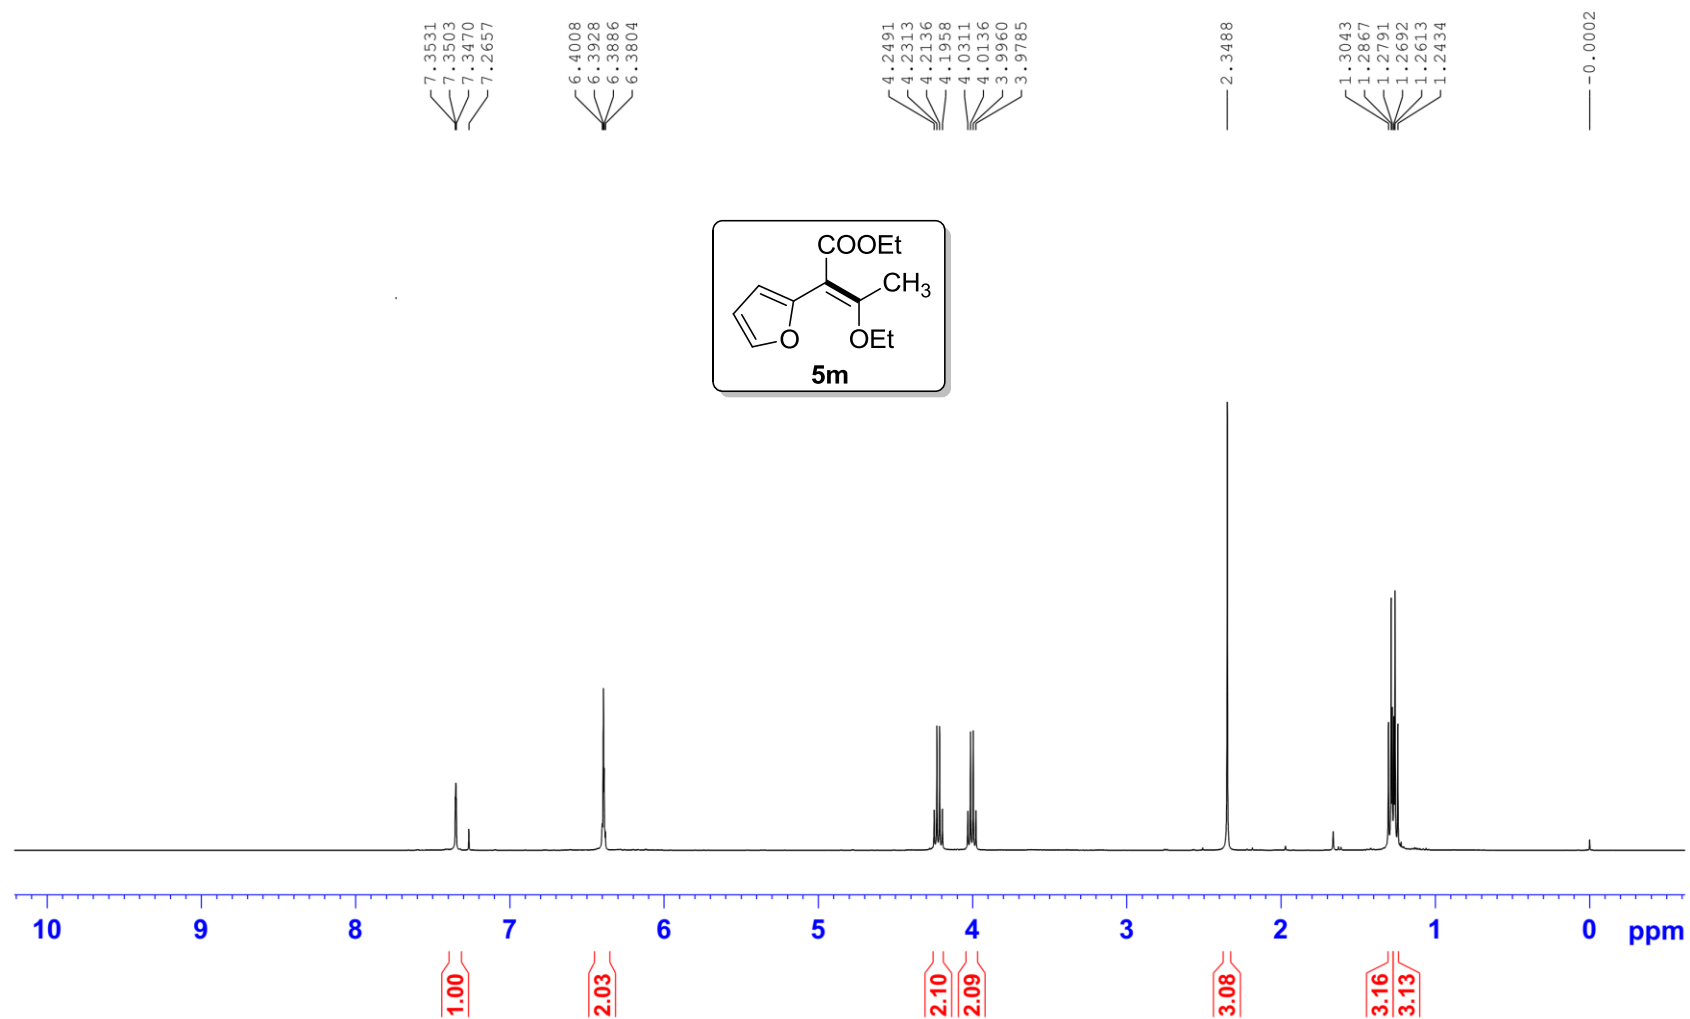

LJW-X170703-36-CNMR

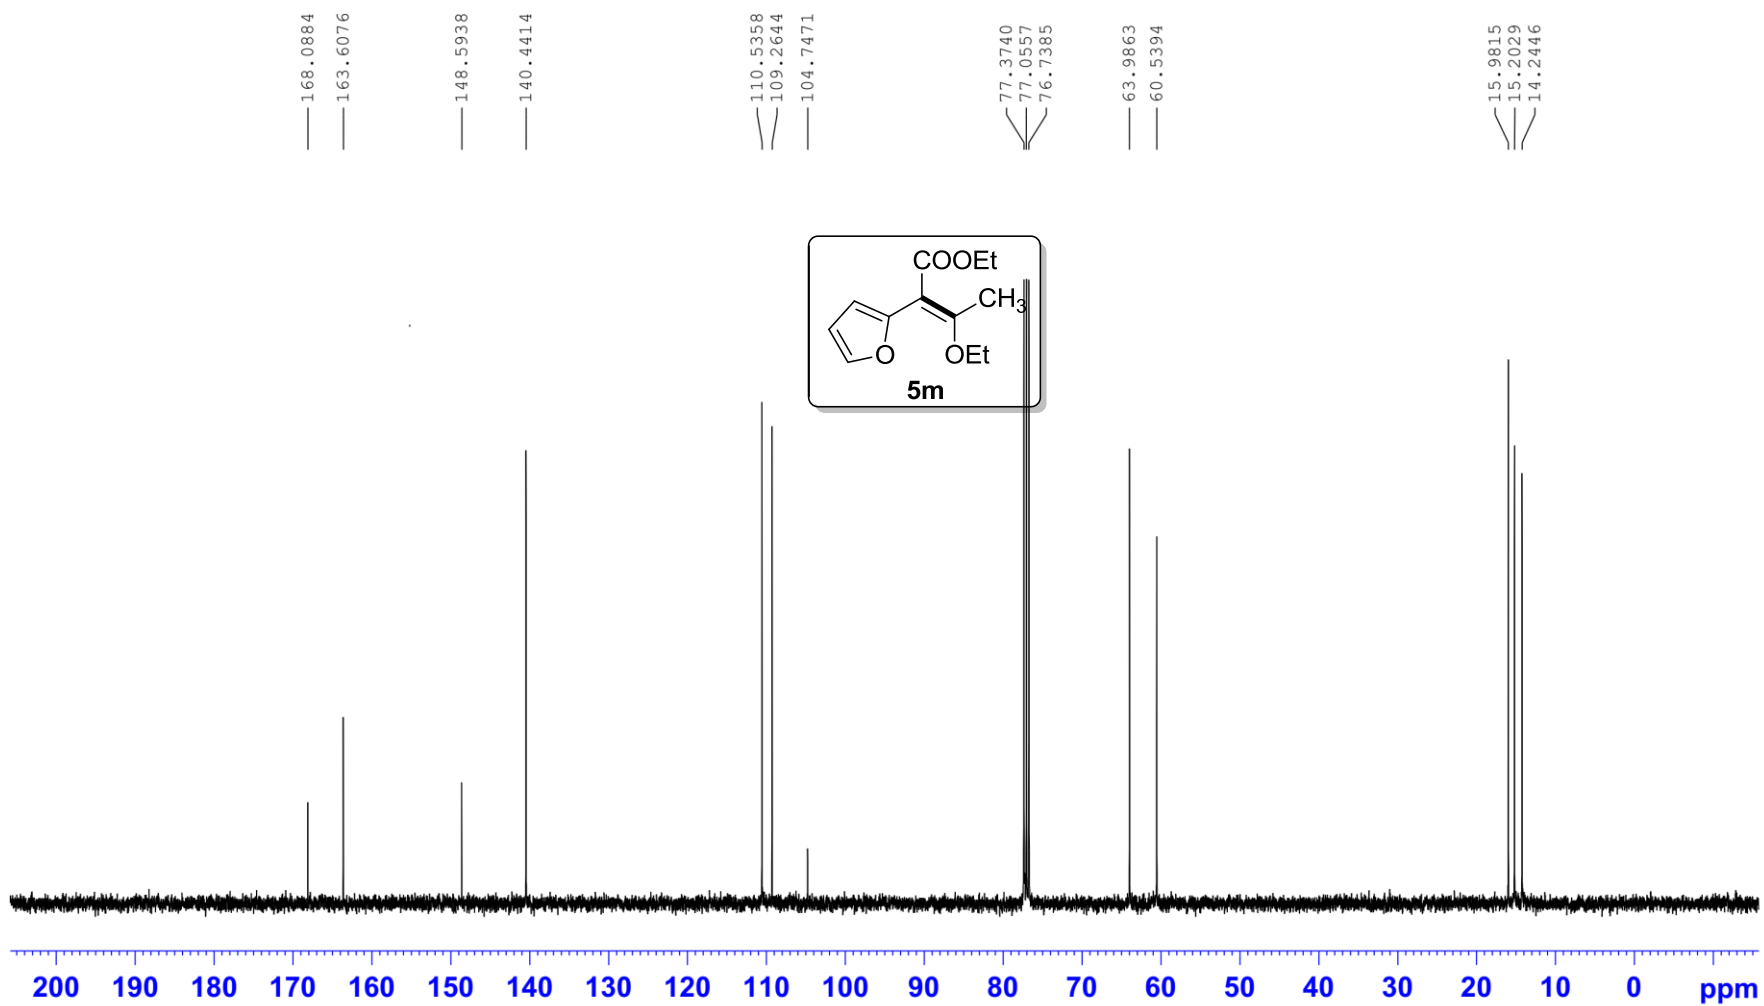

LJW-X170703-37-HNMR

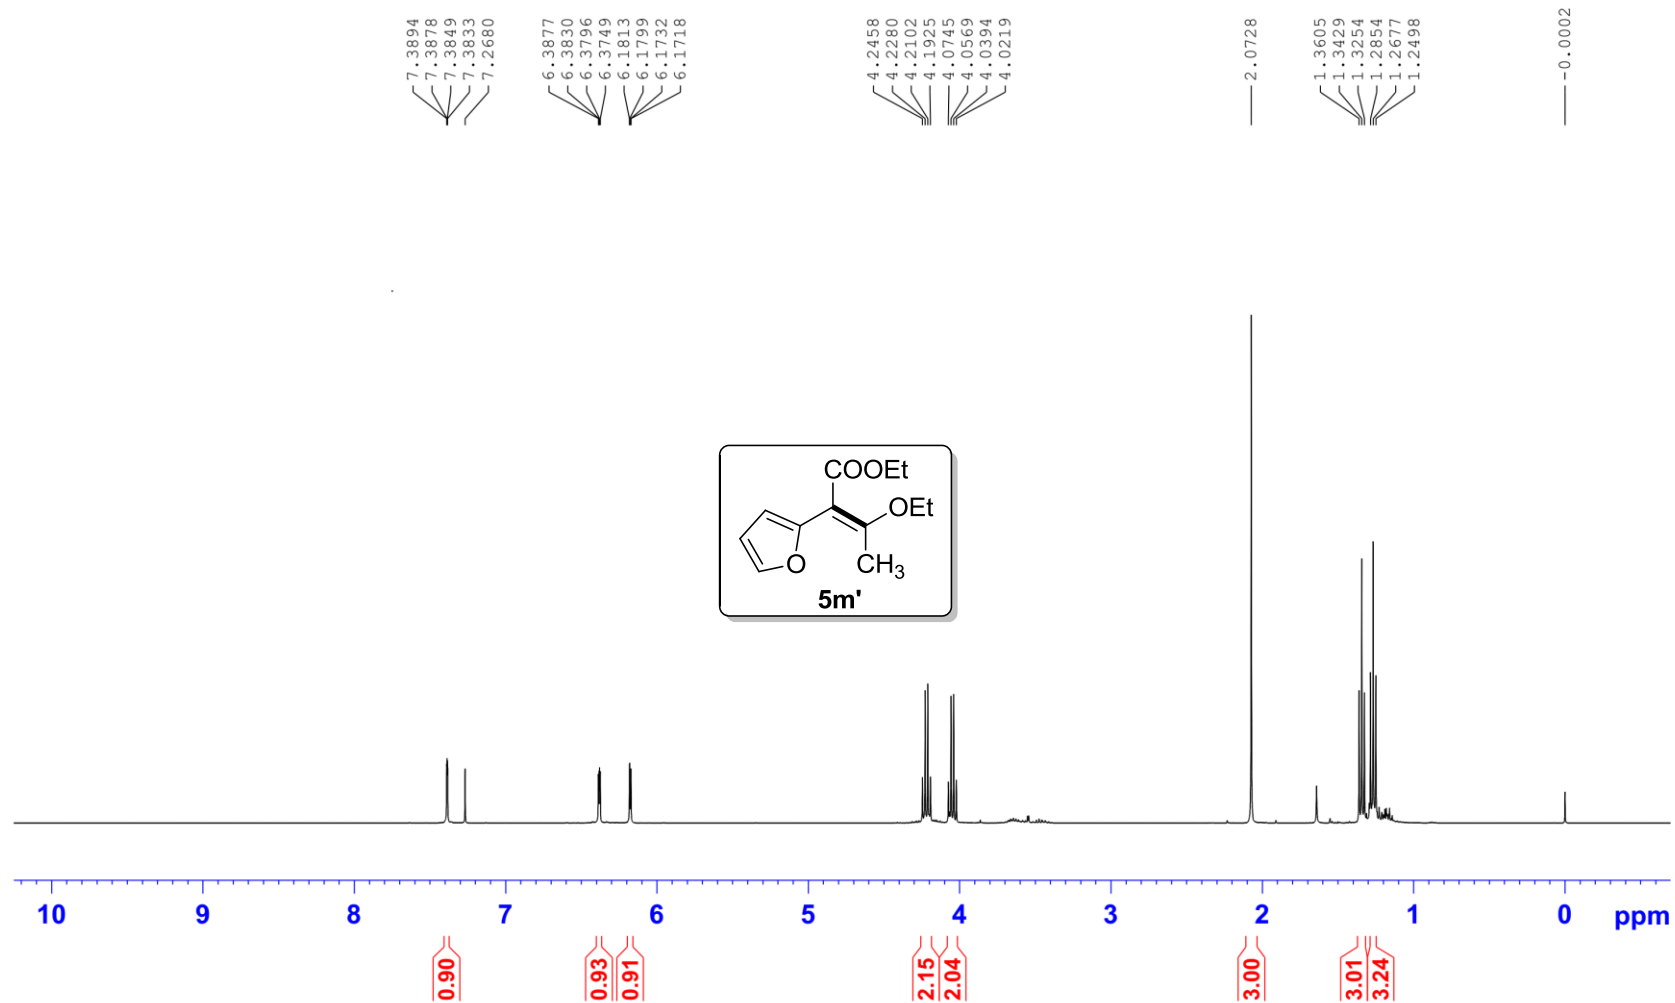

LJW-X170703-38-CNMR

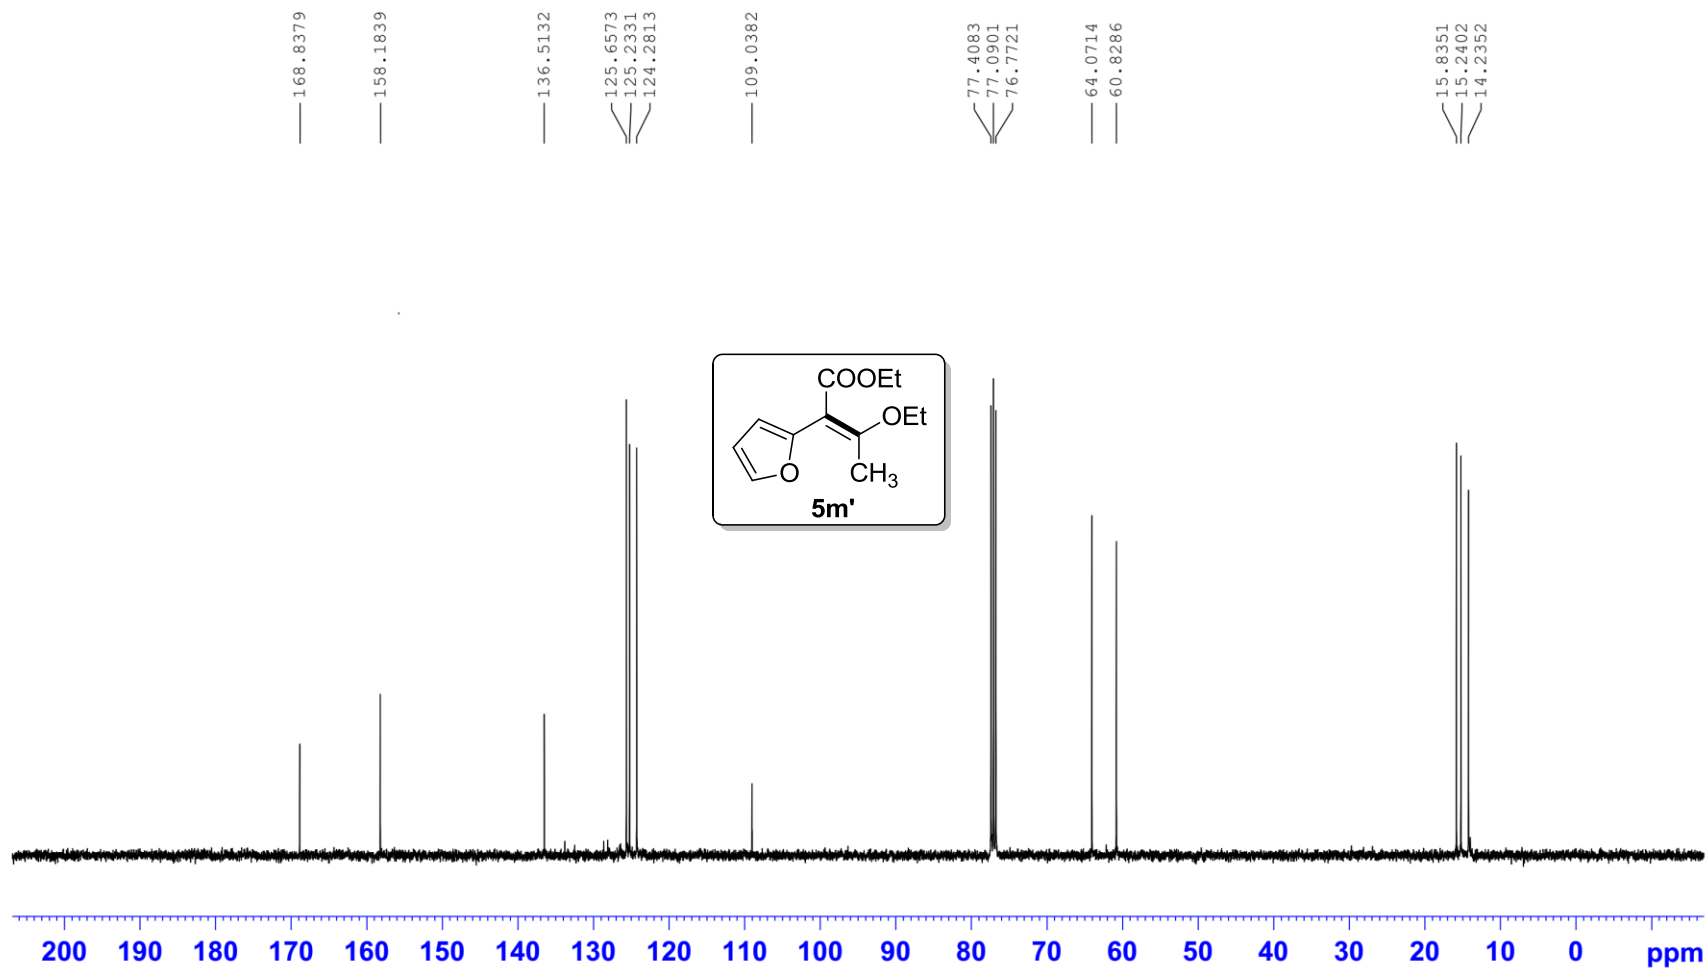

LJW-X170703-38-HNMR

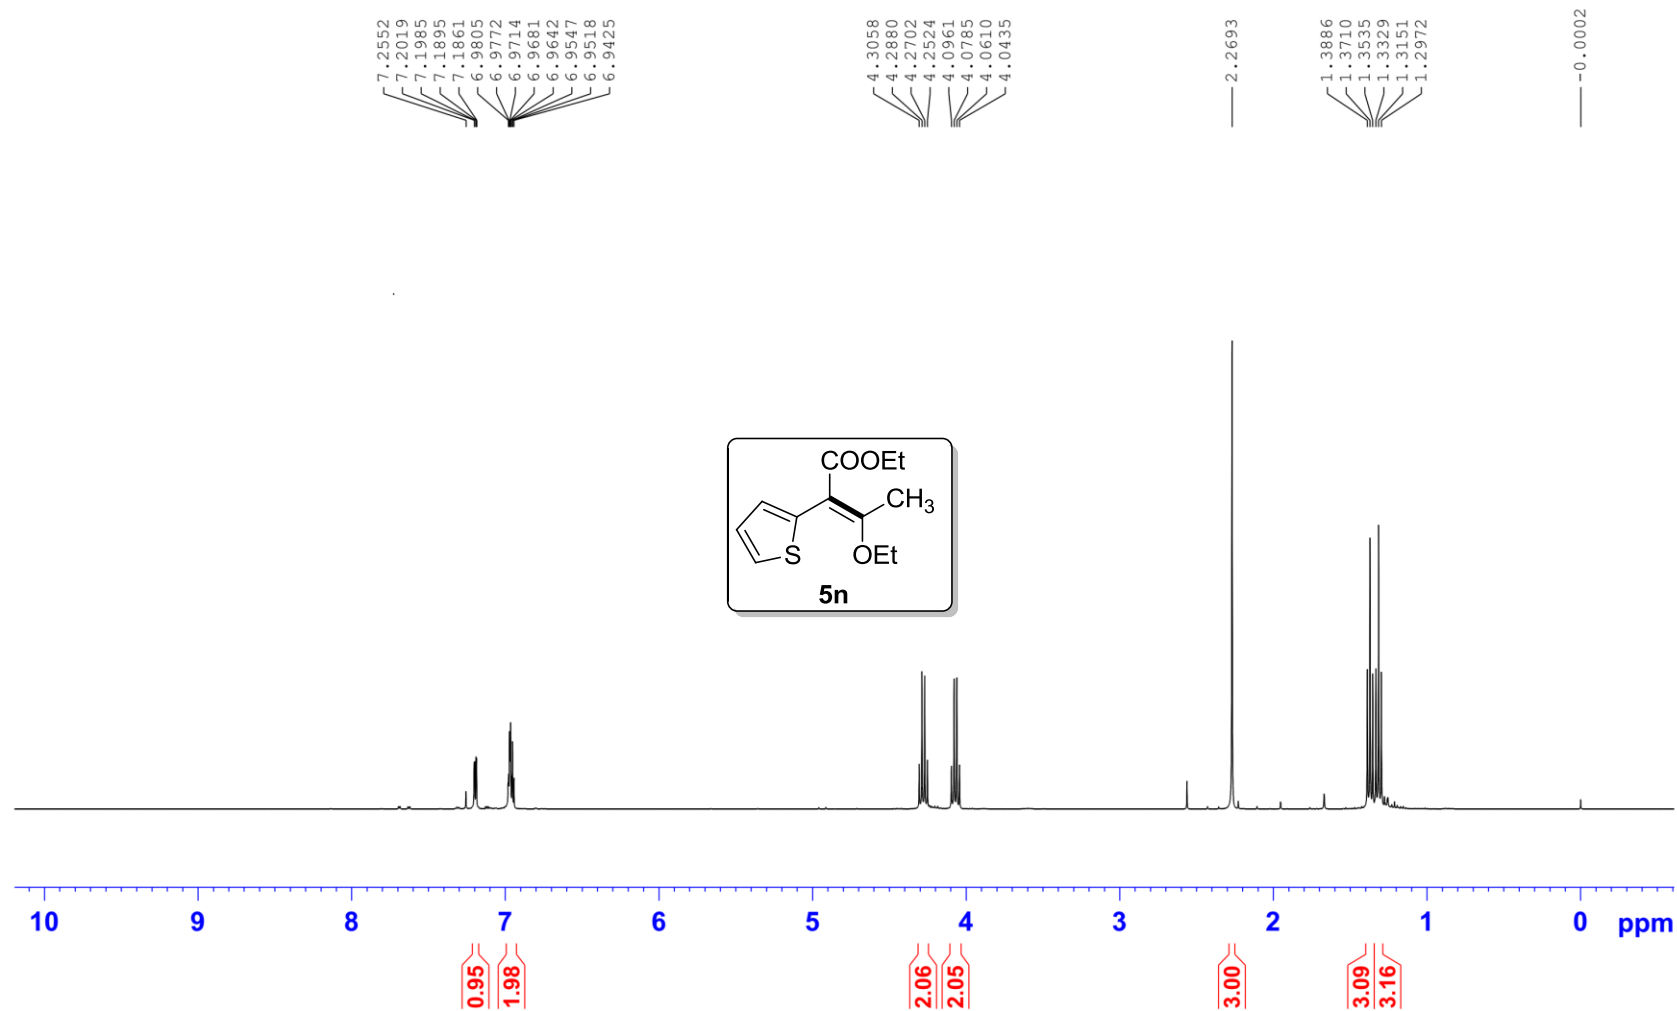

LJW-X170703-38-CNMR

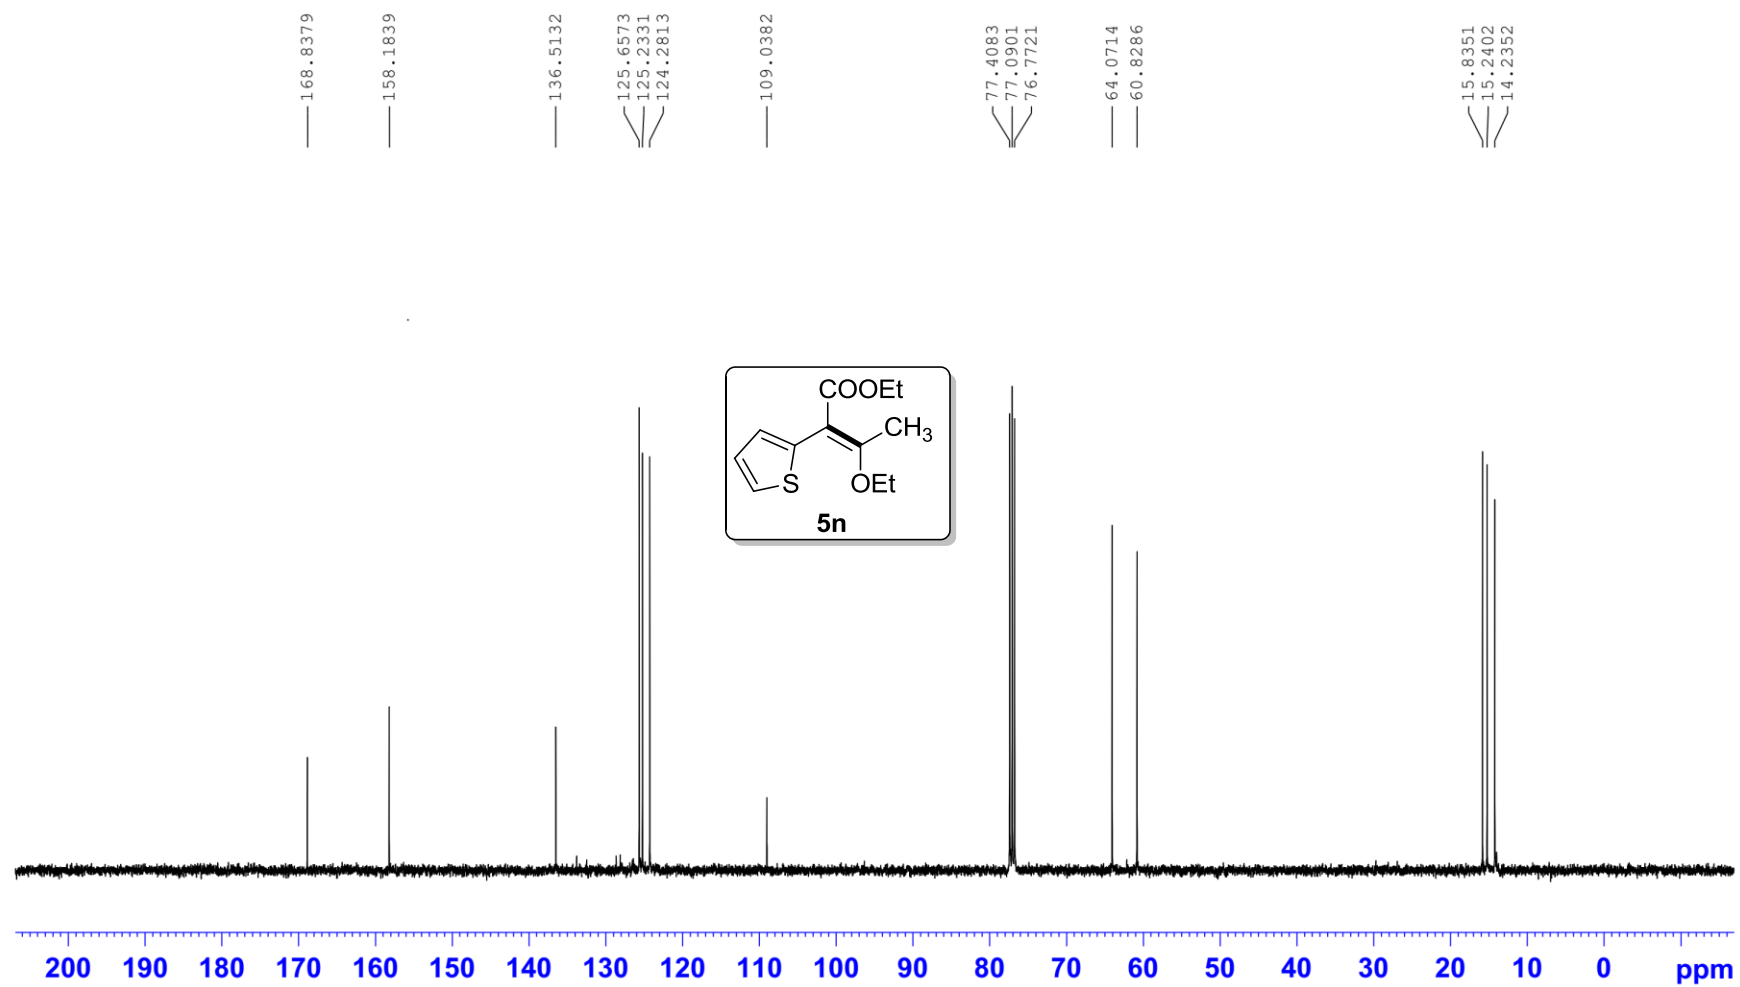

LJW-X170703-39-HNMR

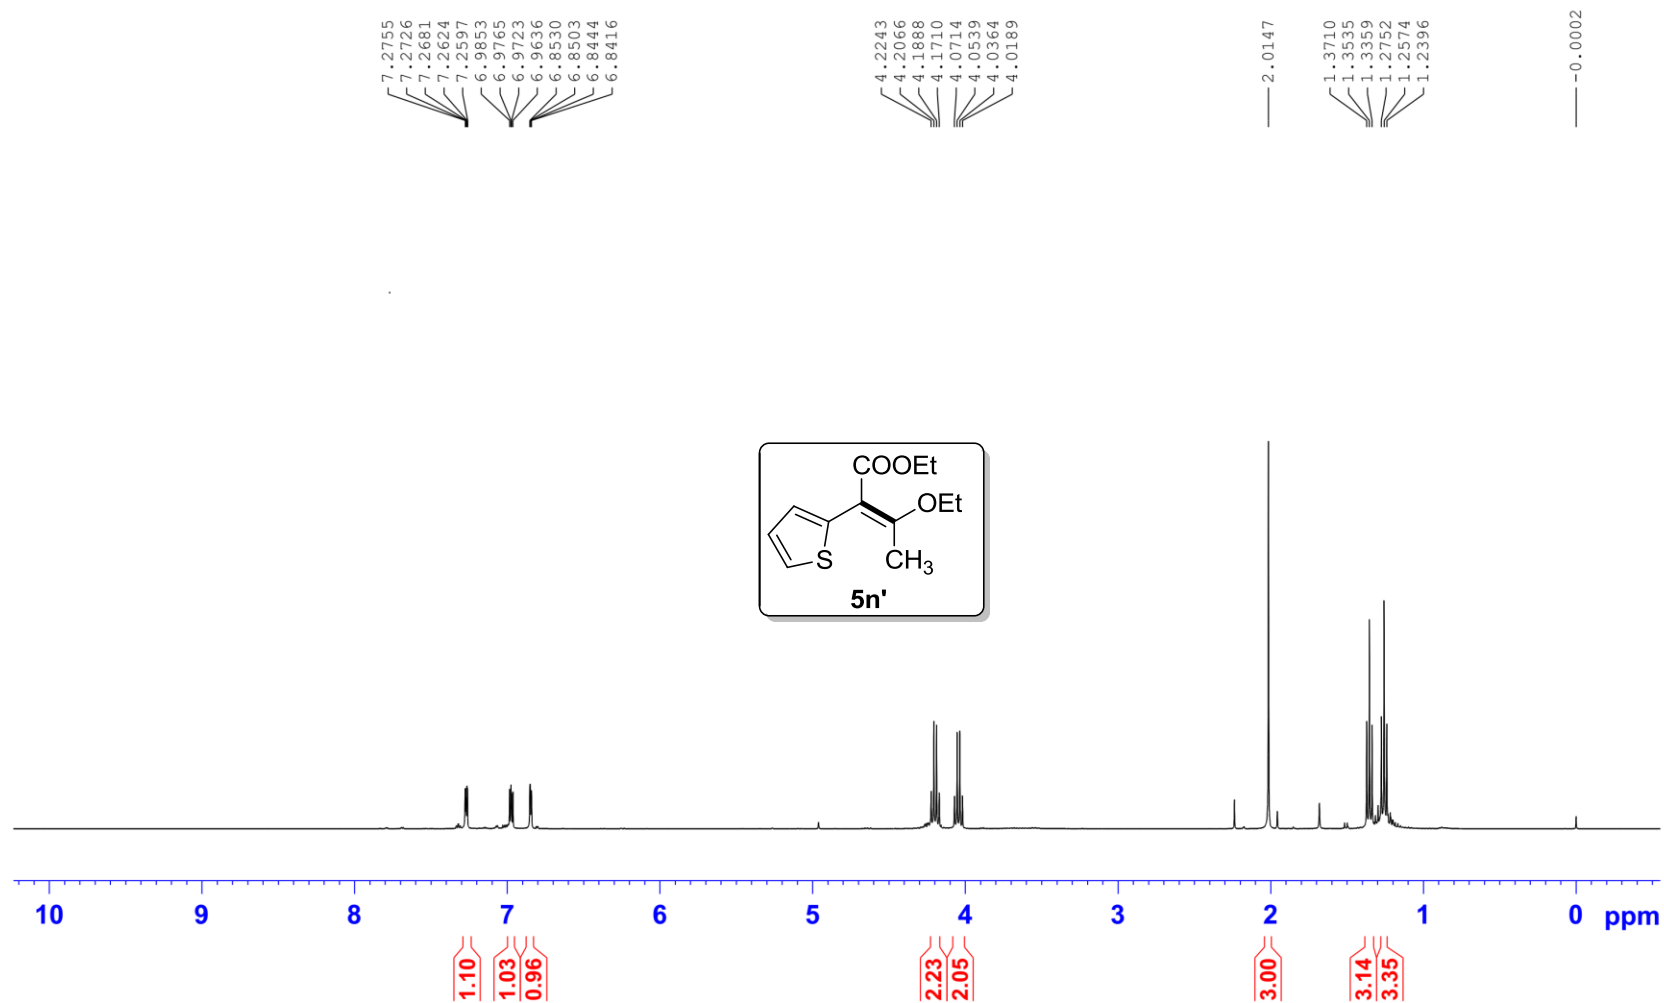

LJW-X170703-39-CNMR

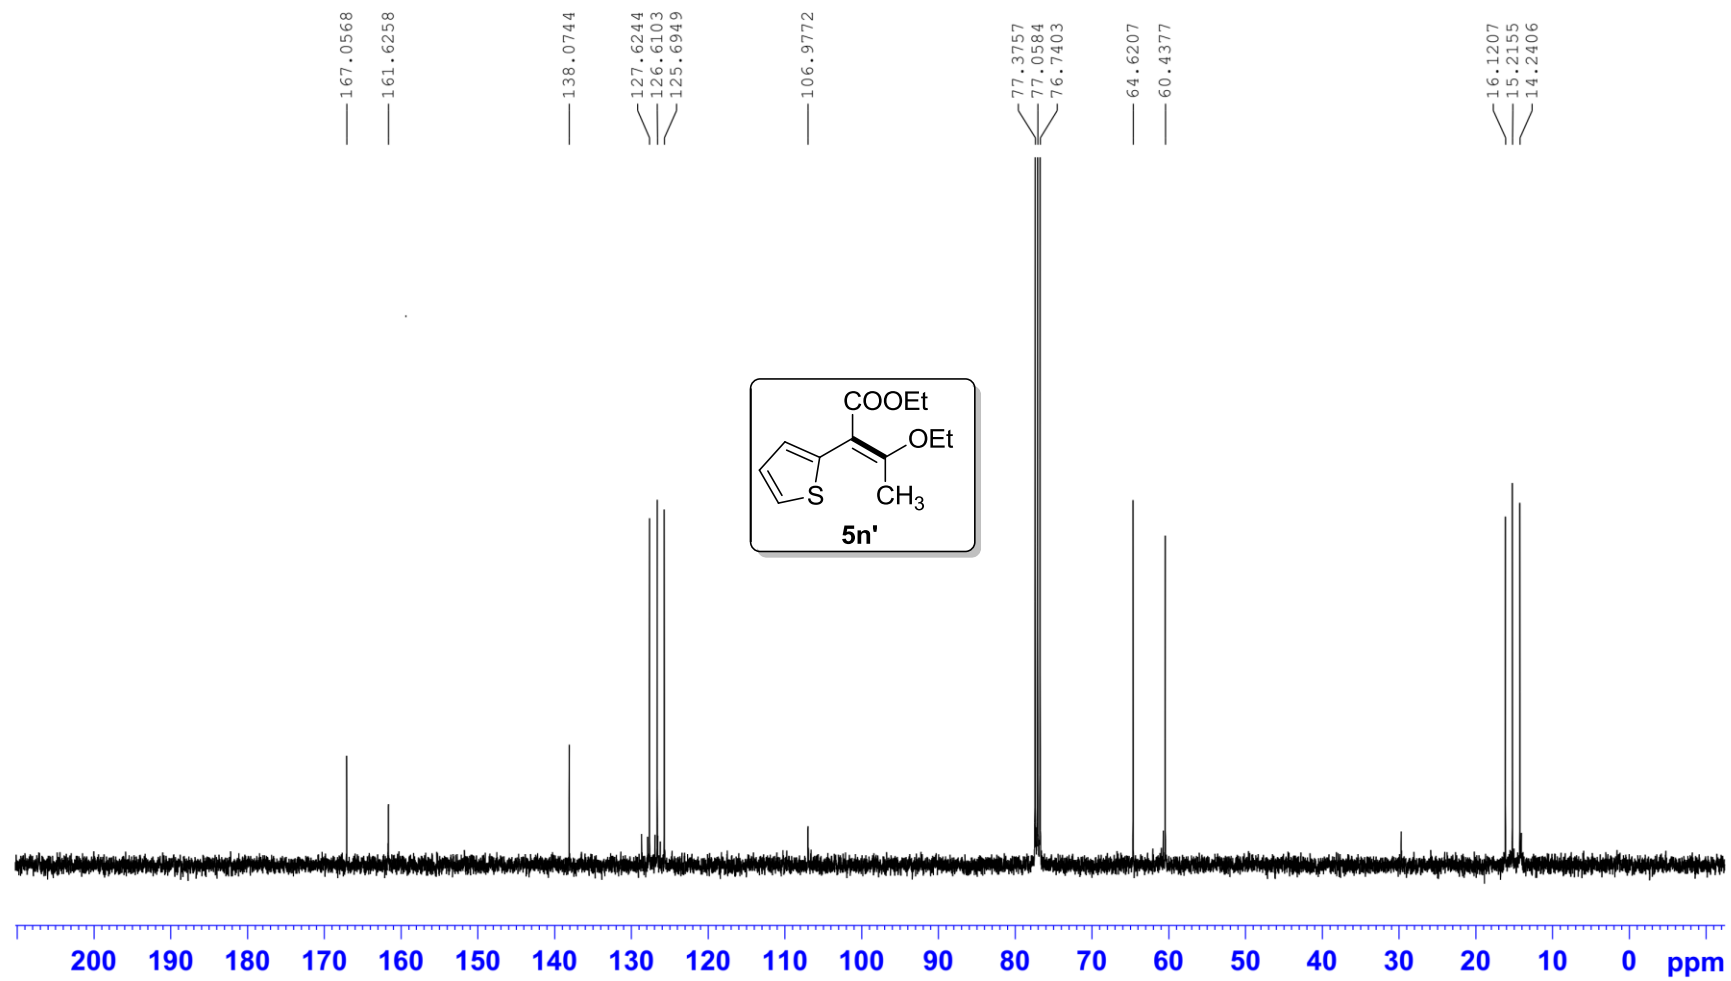

LJW-X180531-7-HNMR

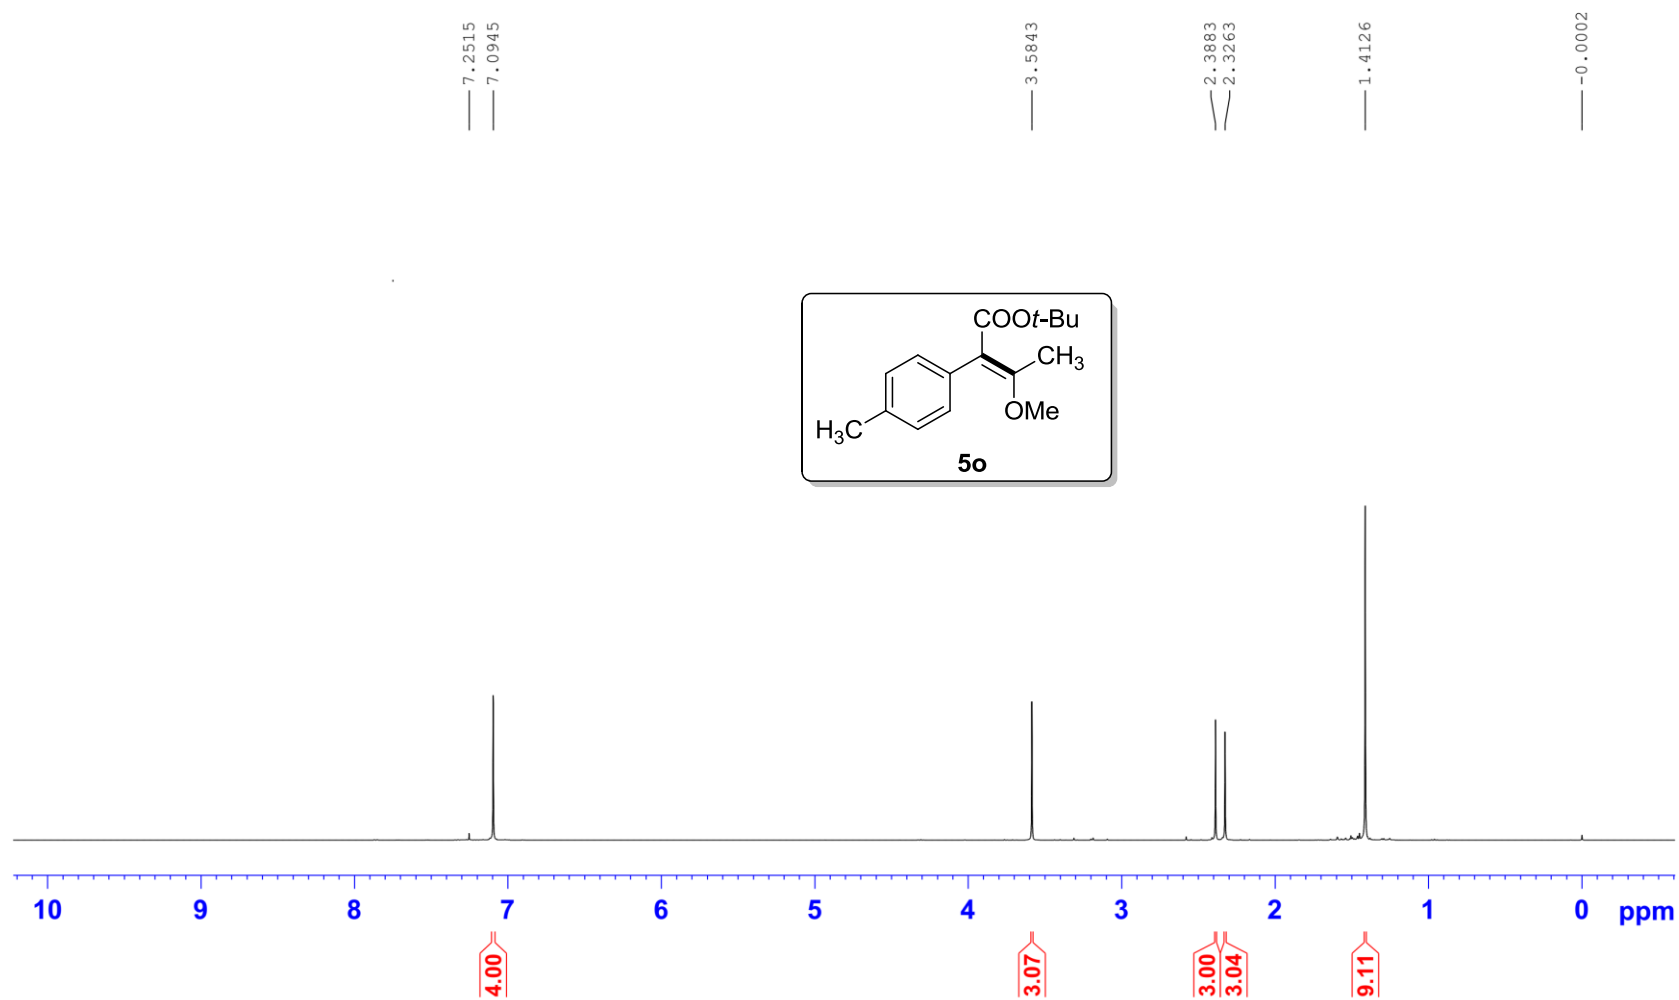

LJW-X180531-7-CNMR

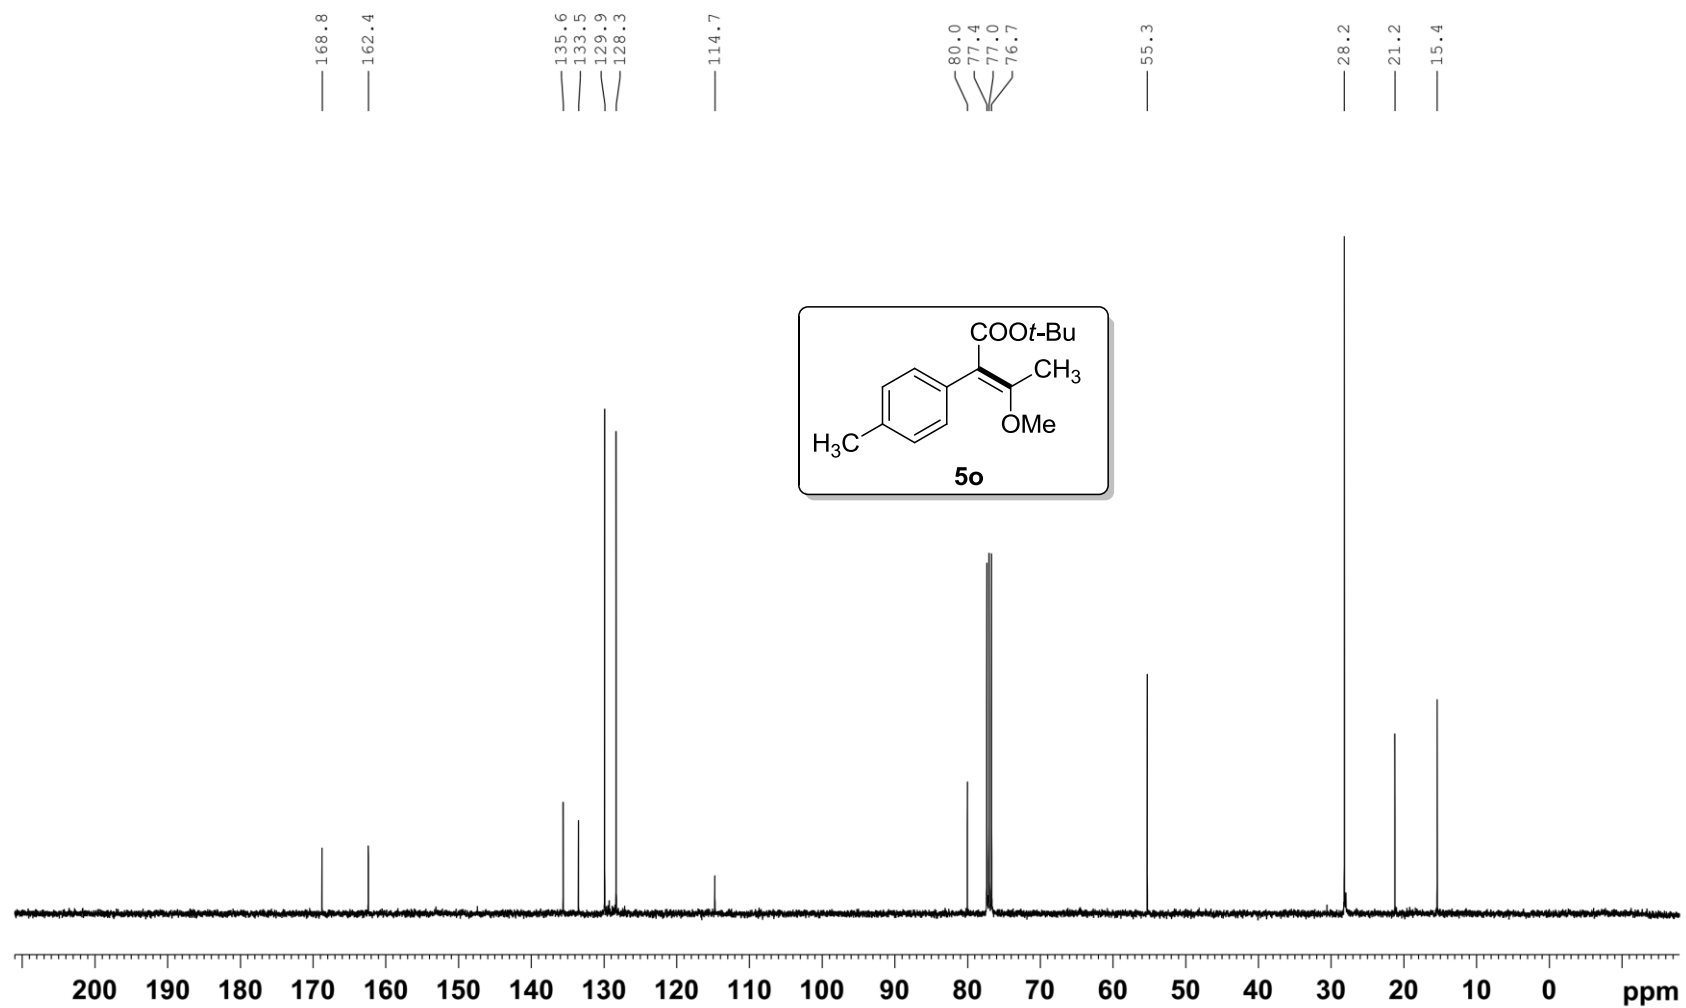

LJW-X180531-8-HNMR

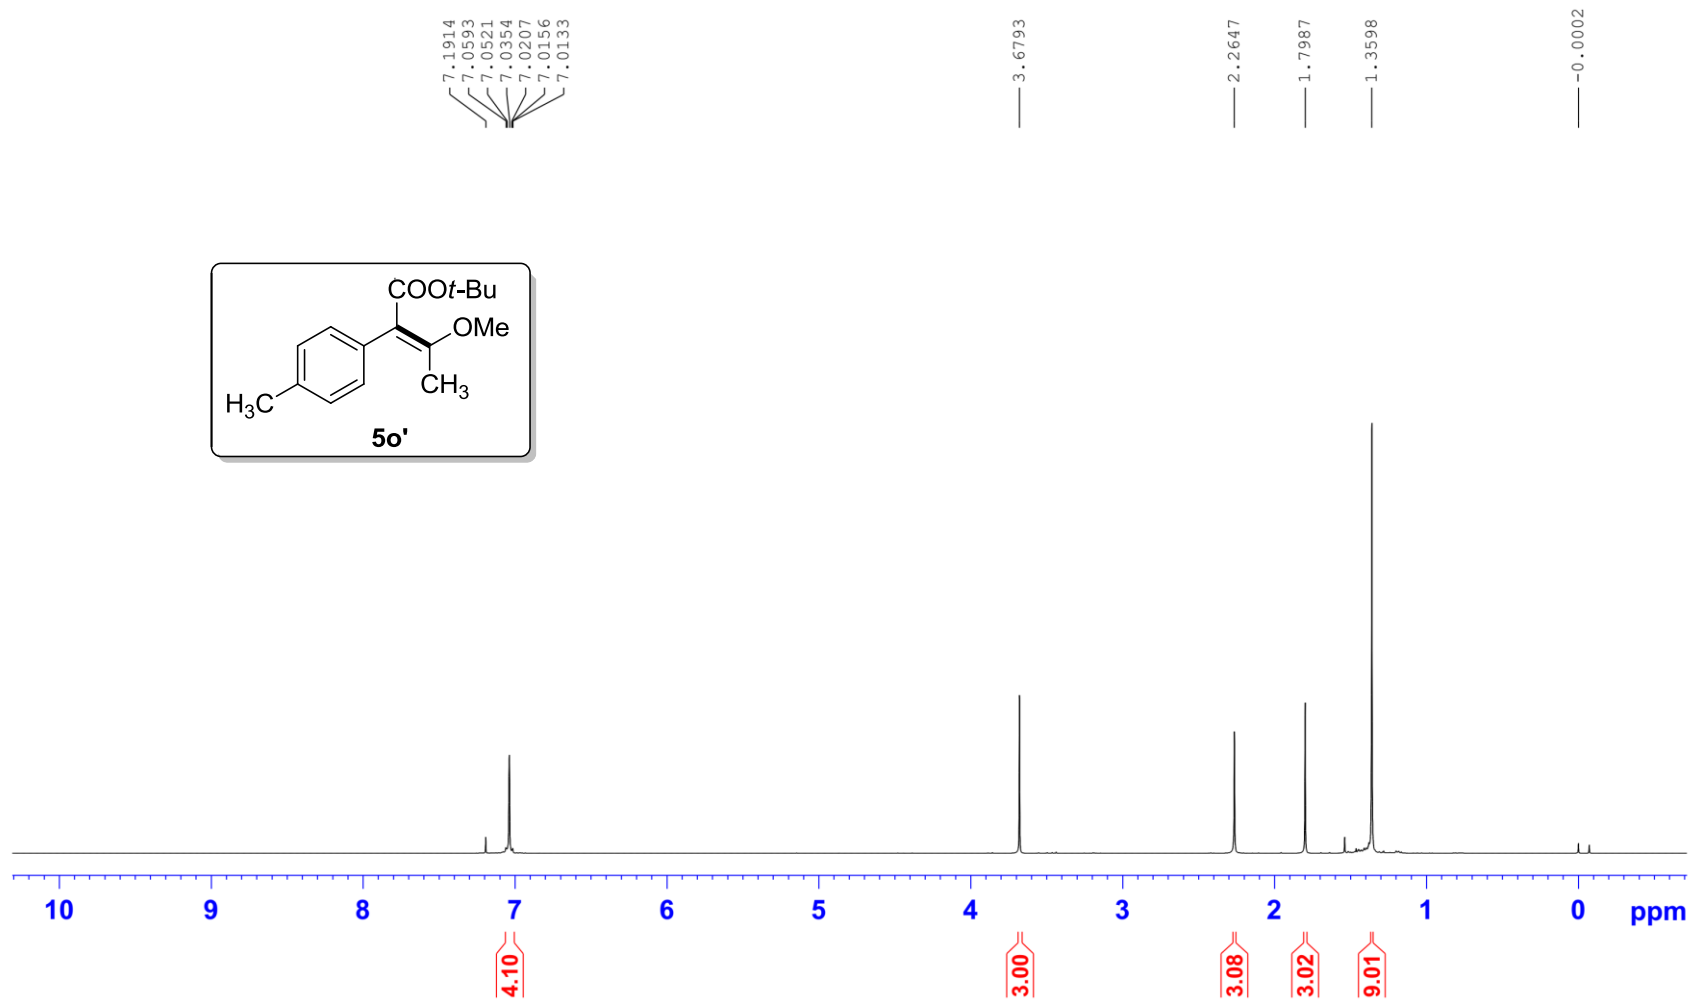

LJW-X180531-8-CNMR

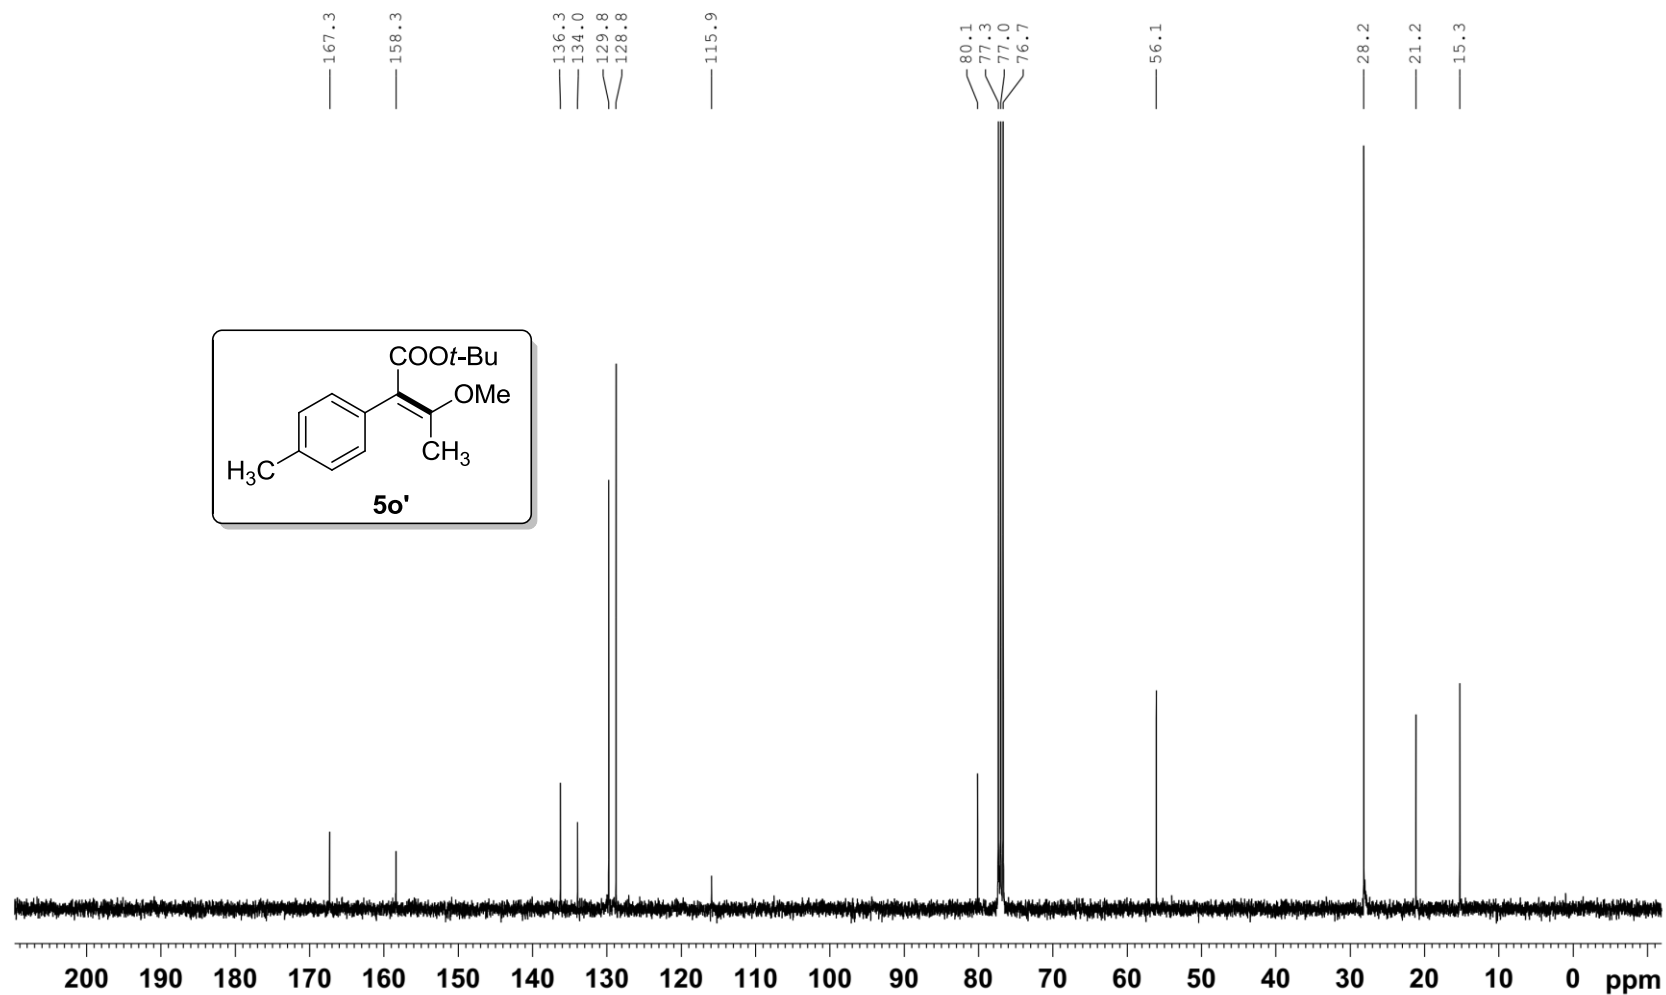

LJW-X170717-2-HNMR

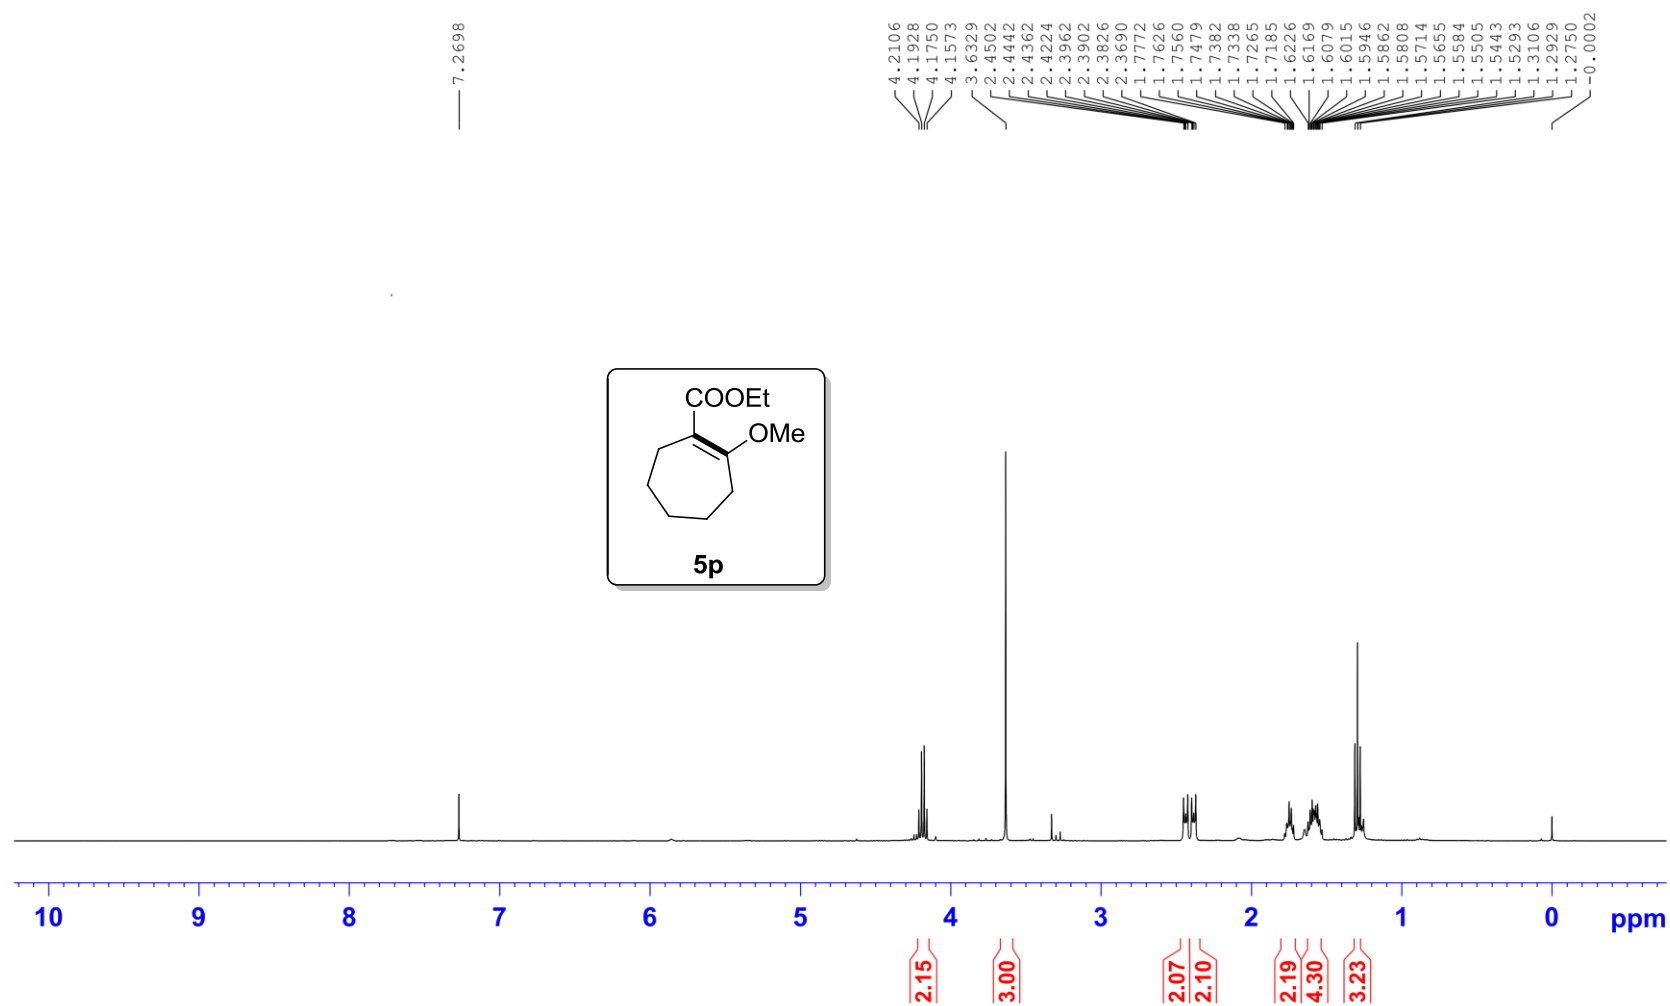

LJW-X170717-2-CNMR

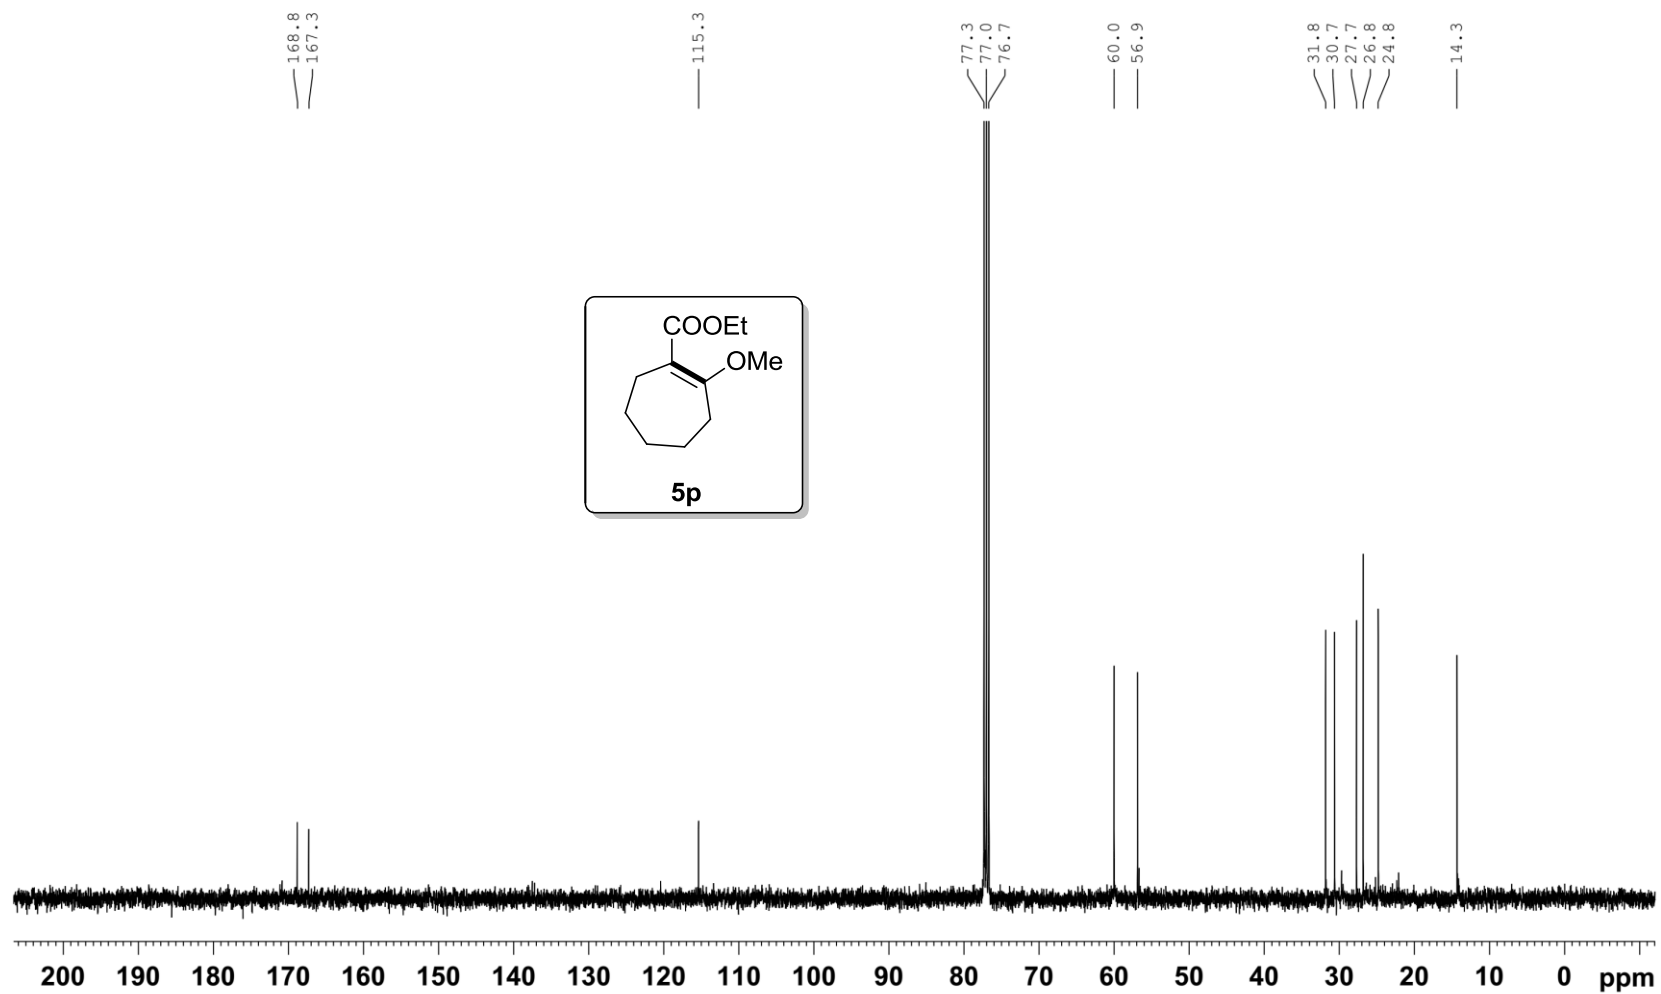

LJW-X180917-3-HNMR

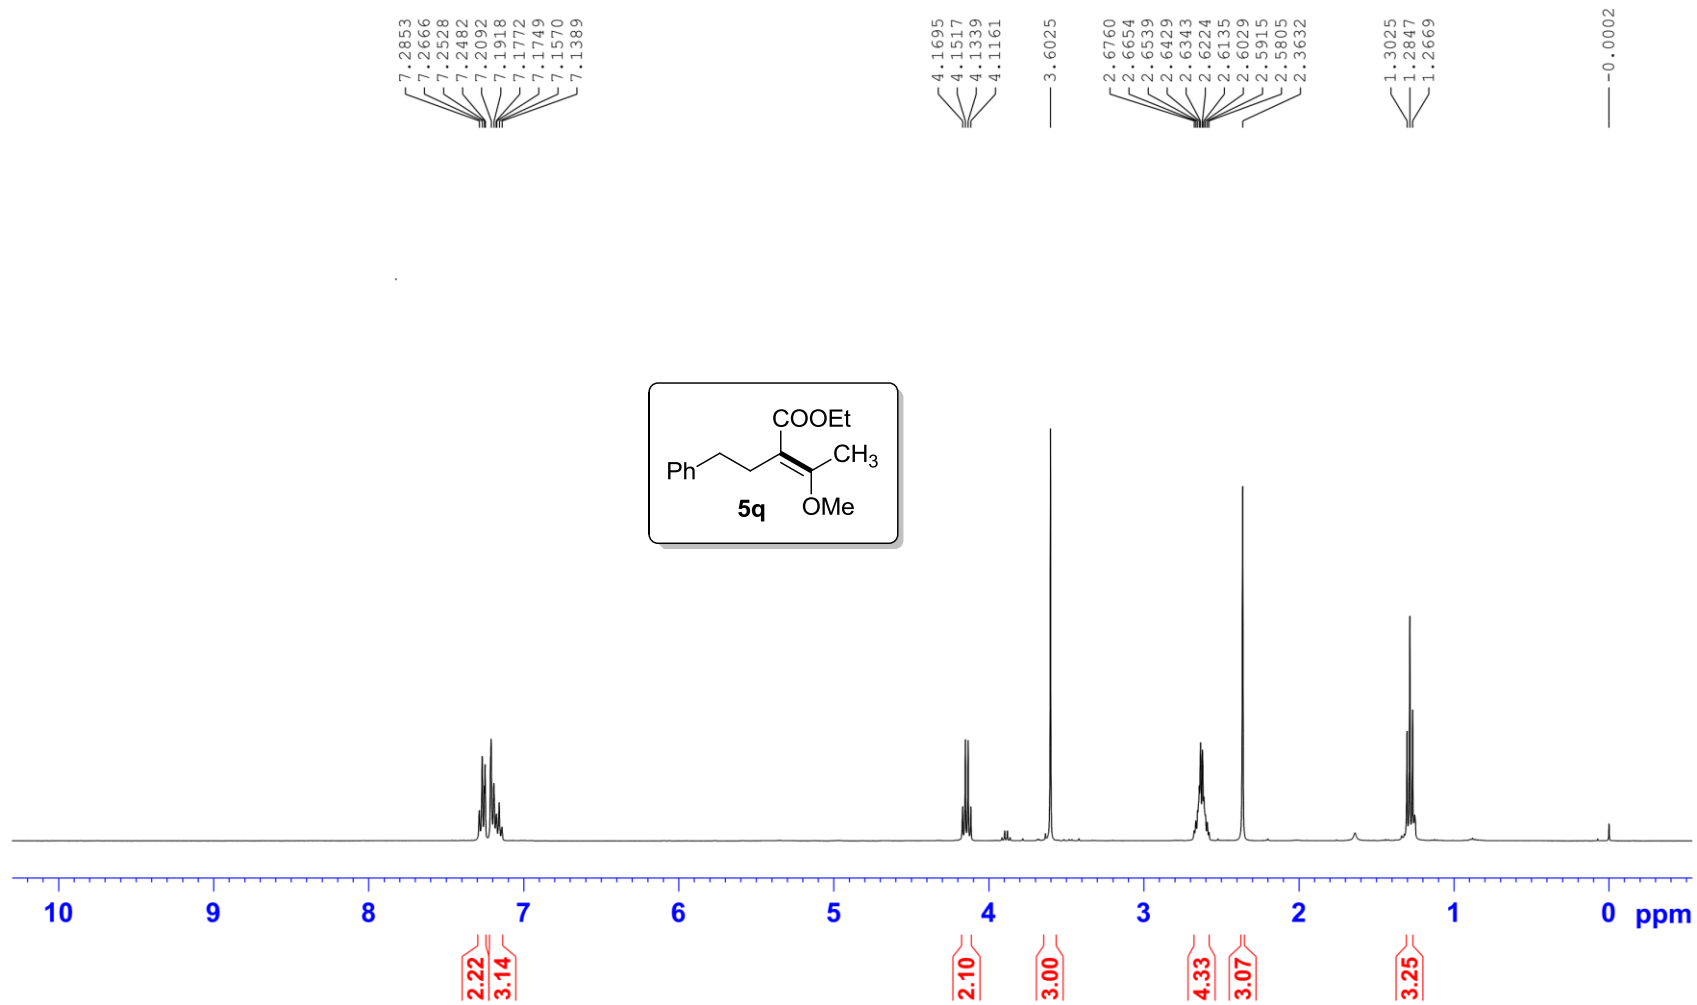

LJW-X180917-3-CNMR

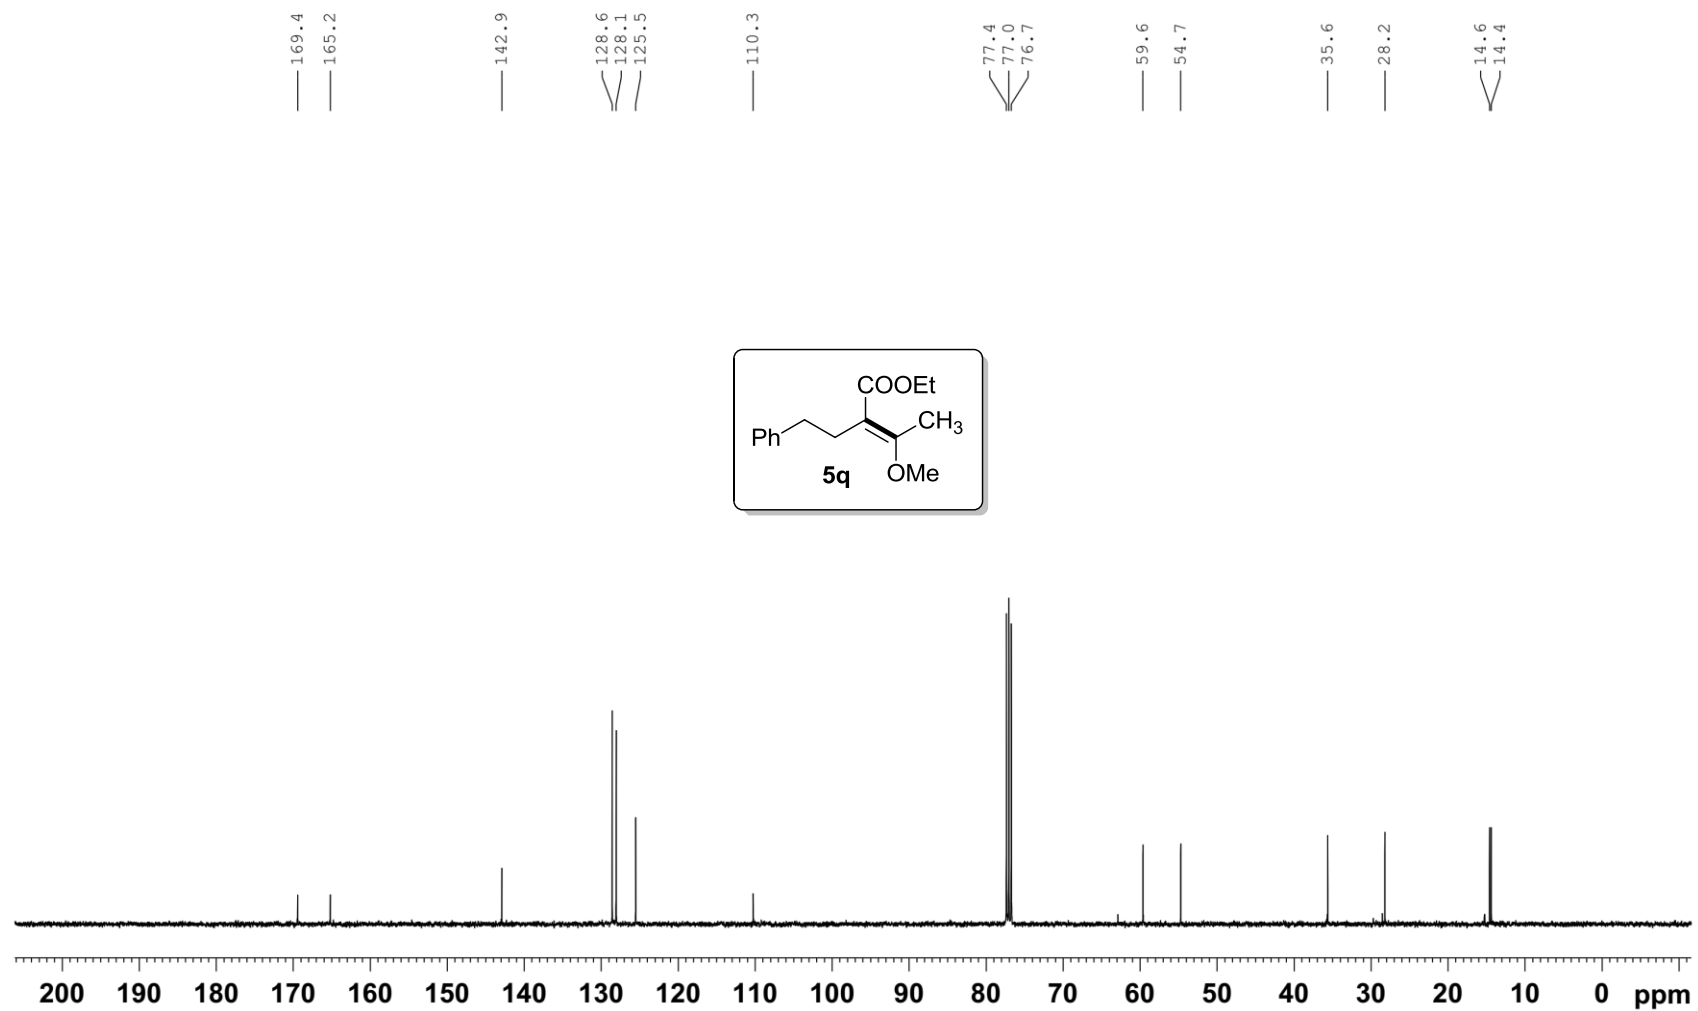

LJW-X180917-2-HNMR

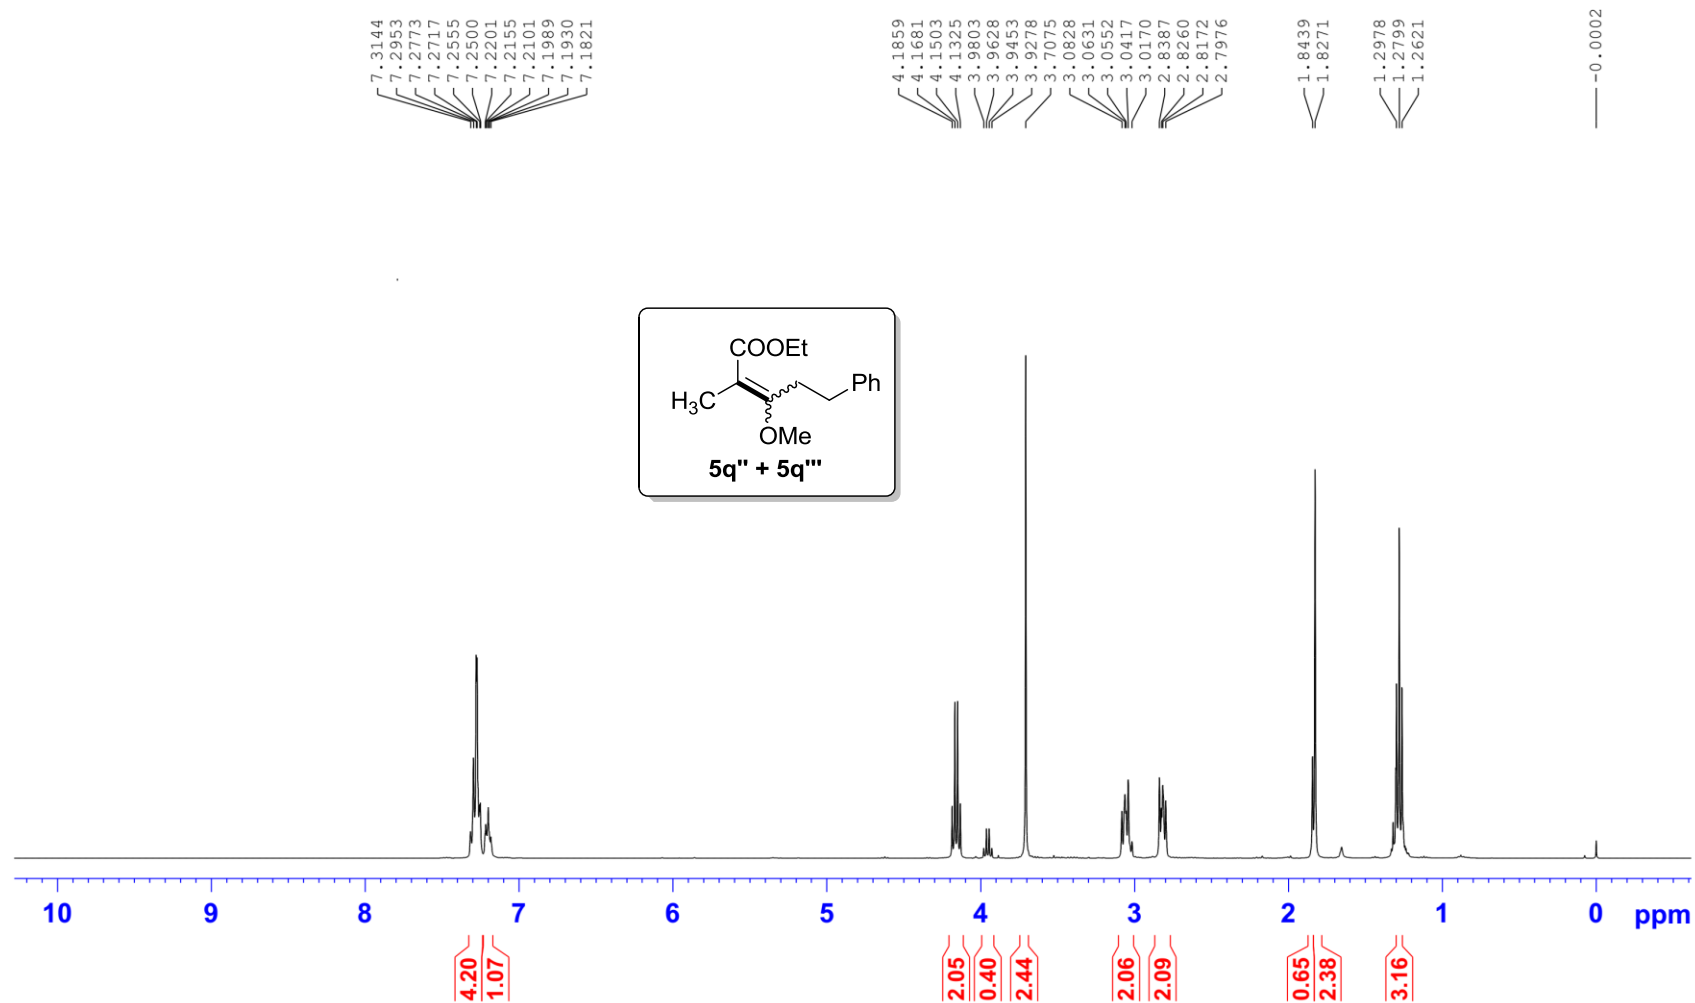

LJW-X180917-2-CNMR

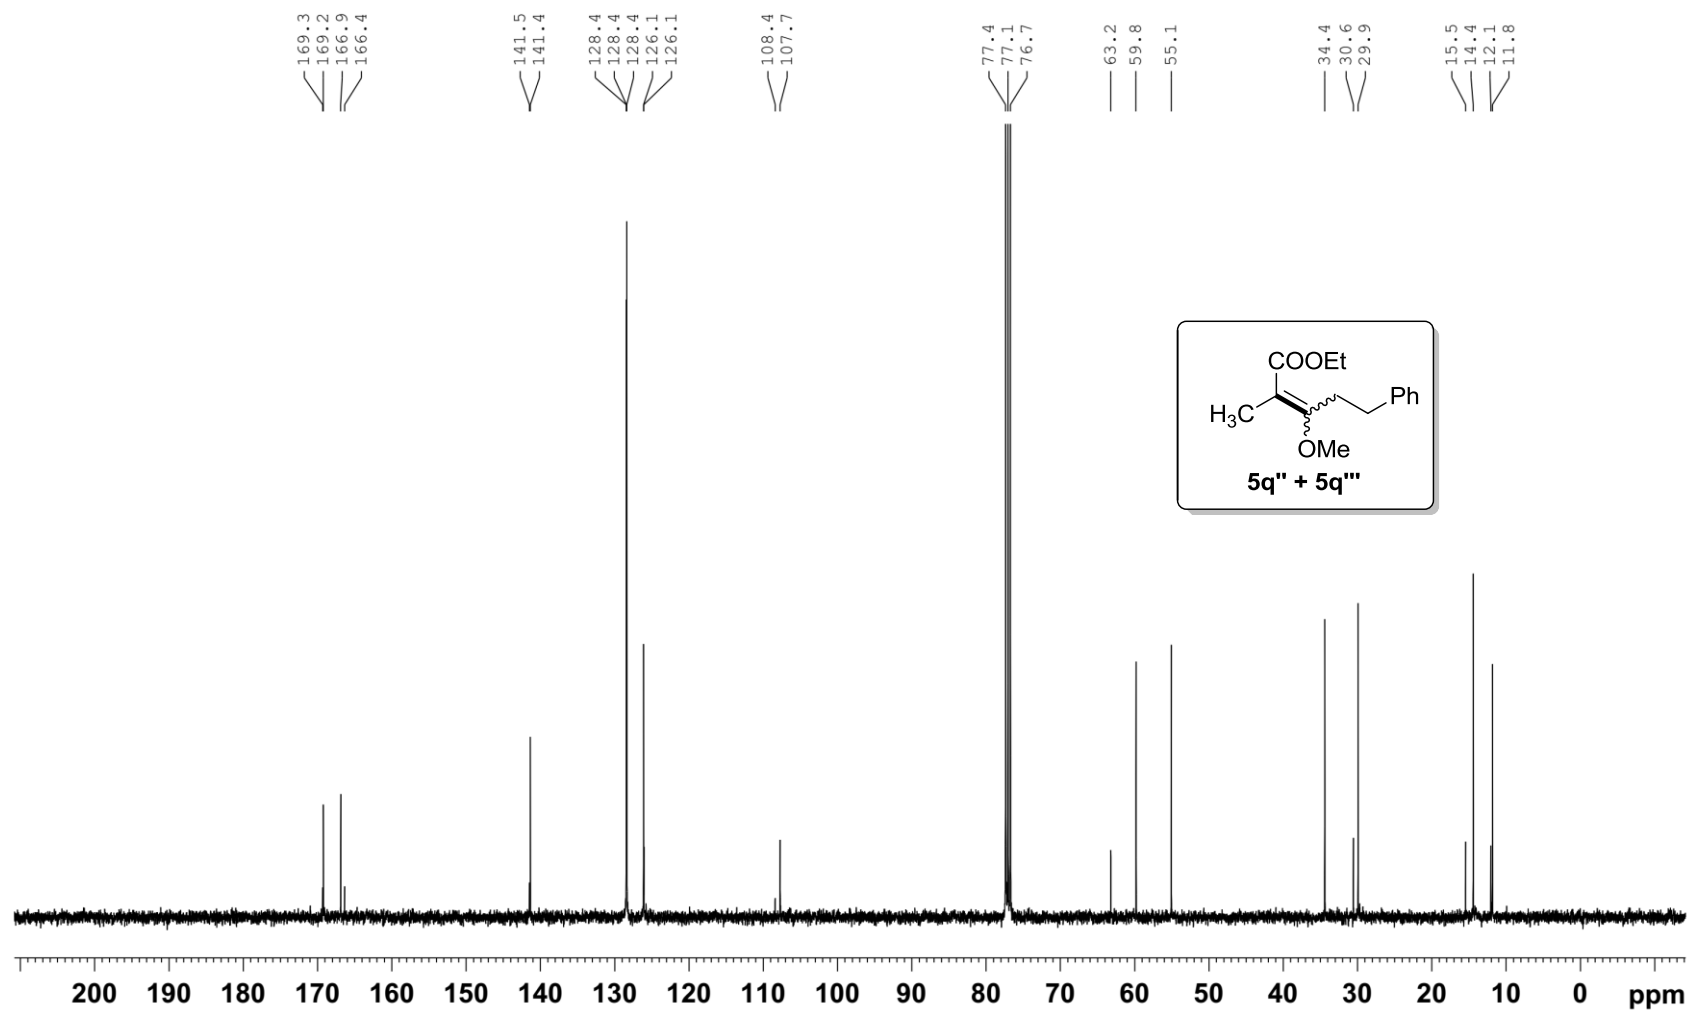

LJW-X170904-1-HNMR

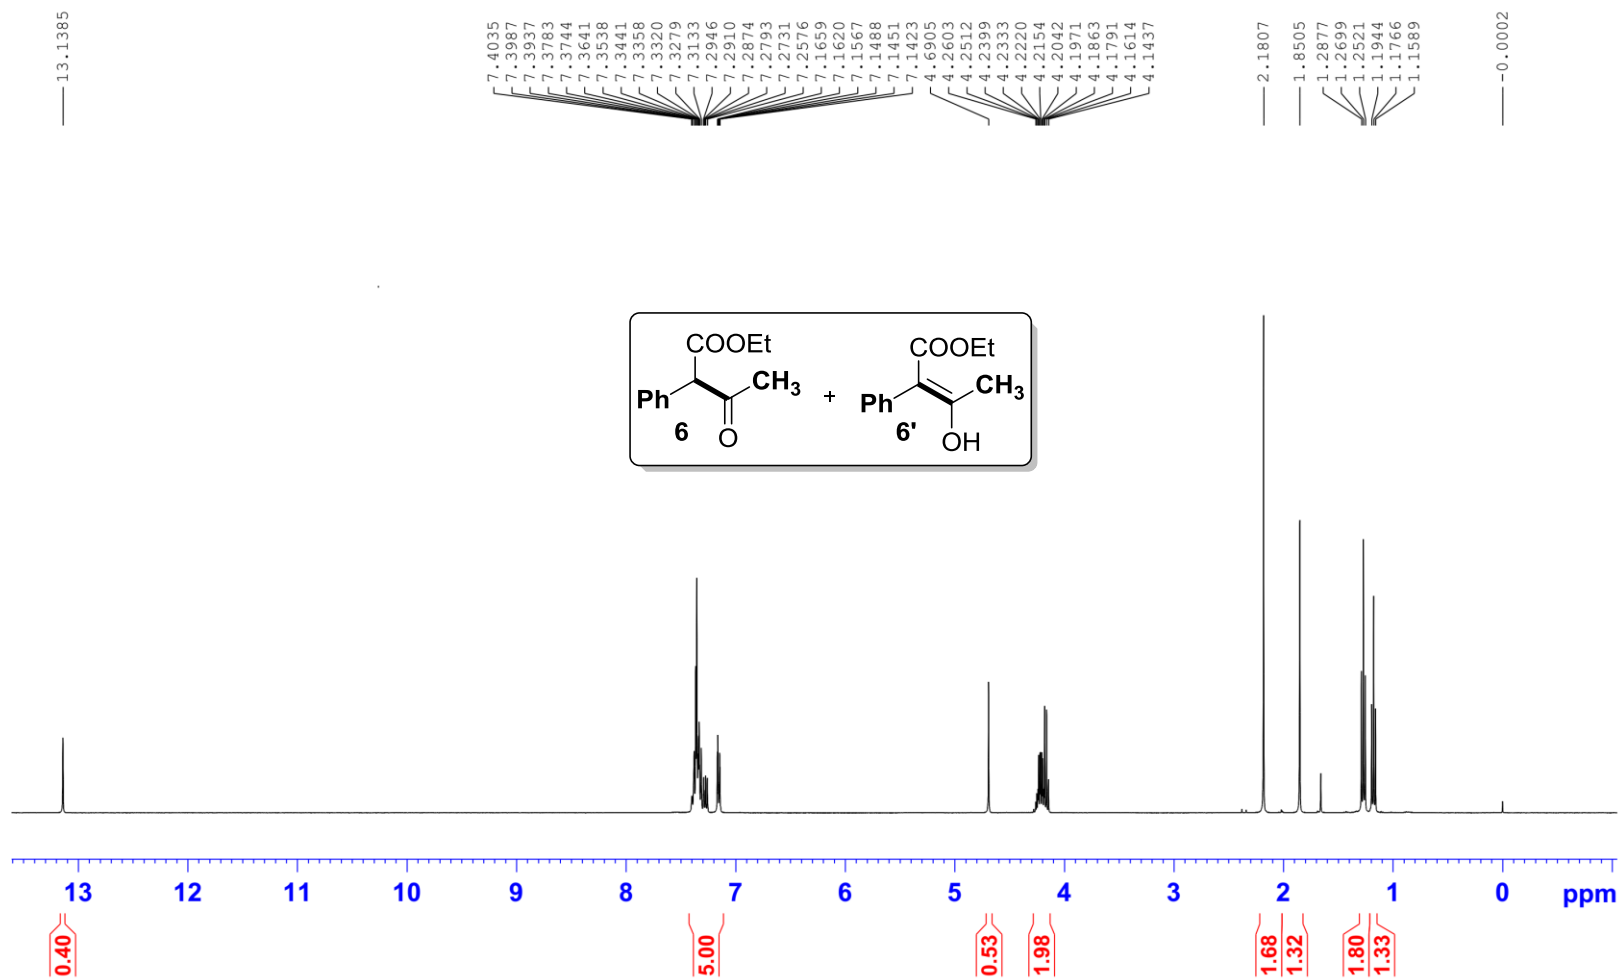

LJW-X170904-1-CNMR

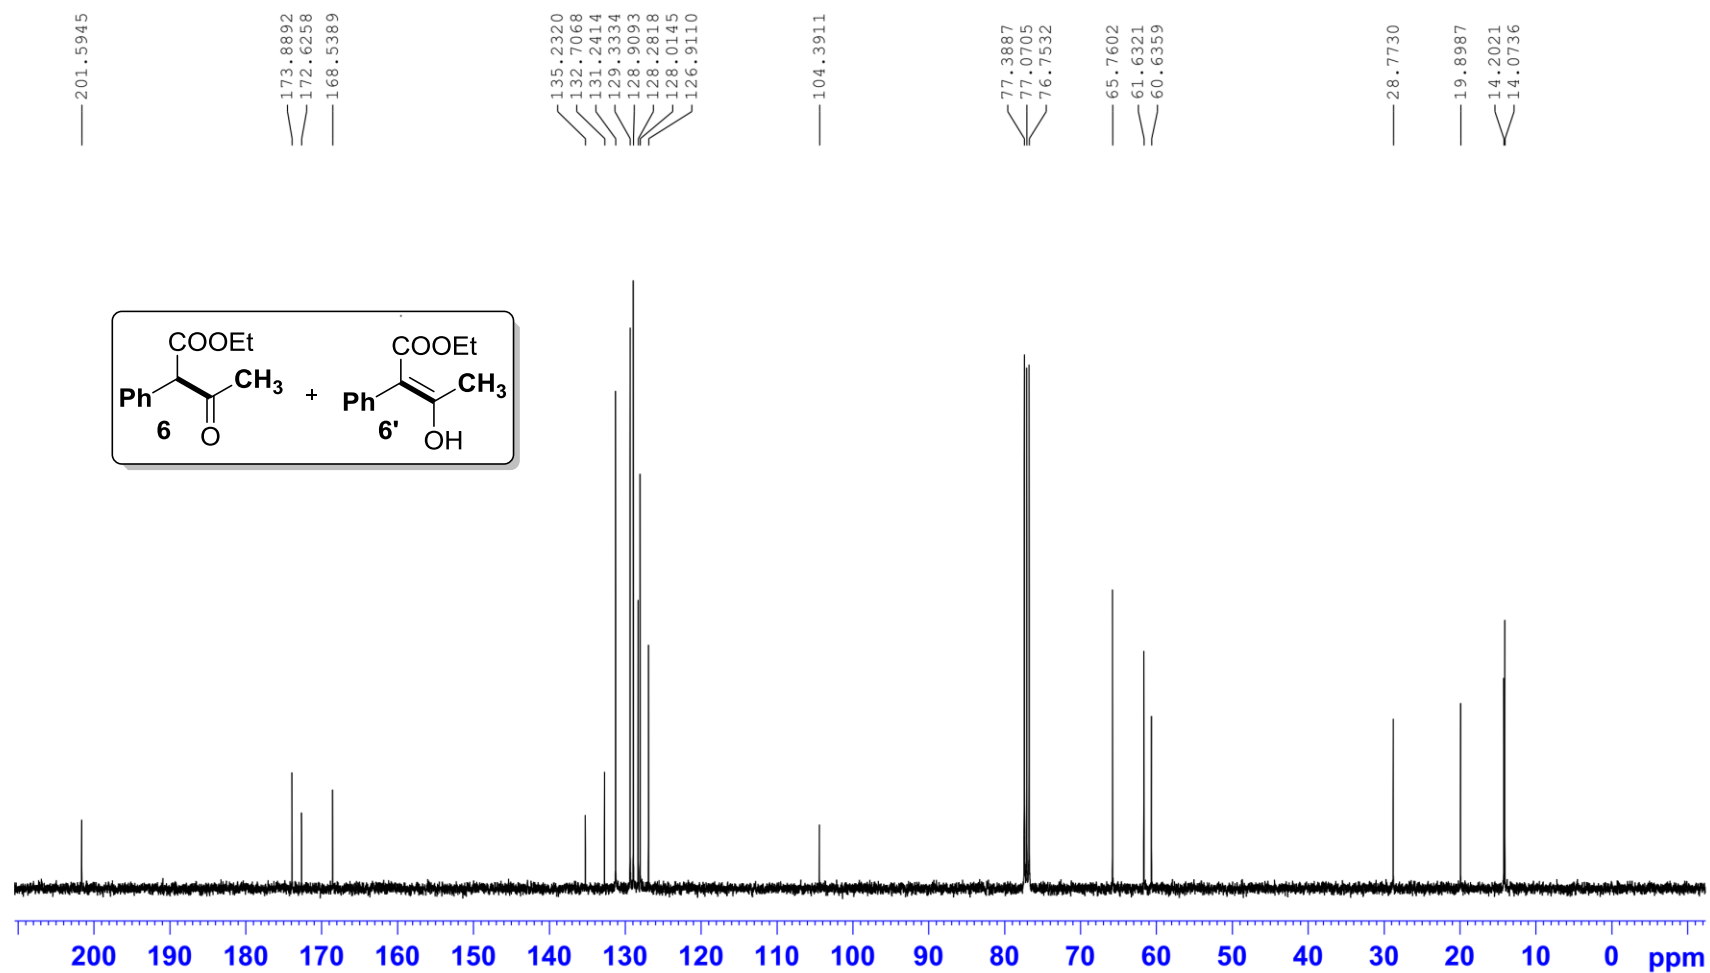

LJW-X180920-2-HNMR

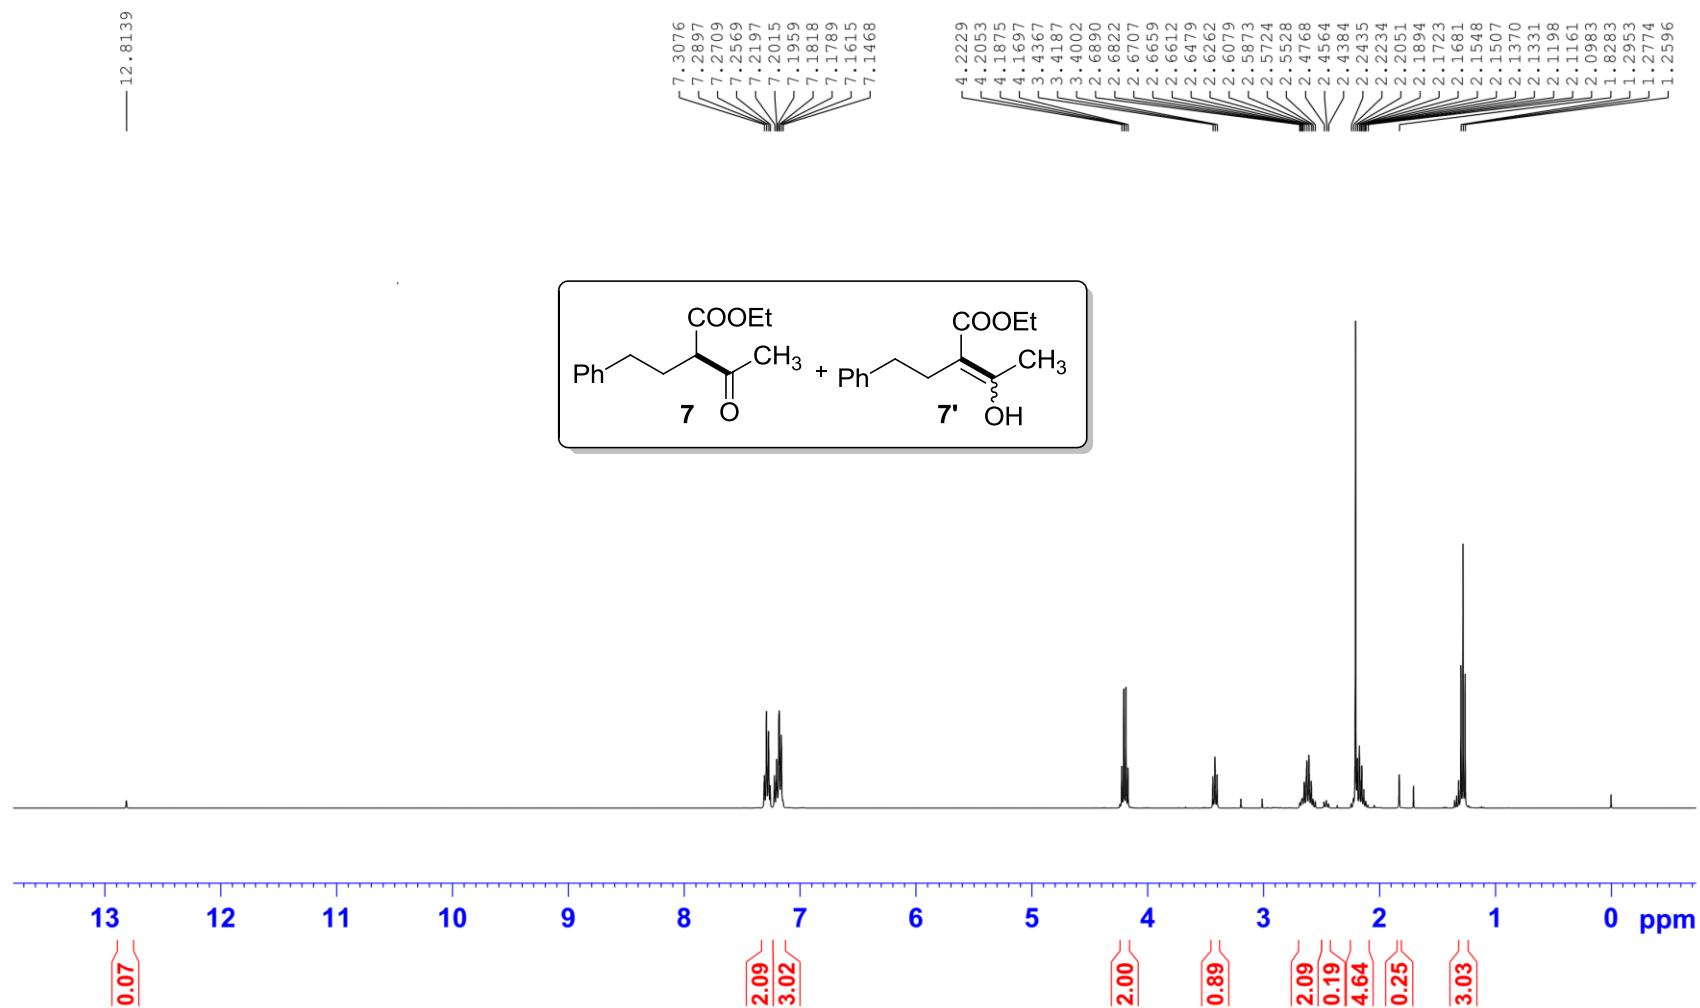

LJW-X180920-2-CNMR

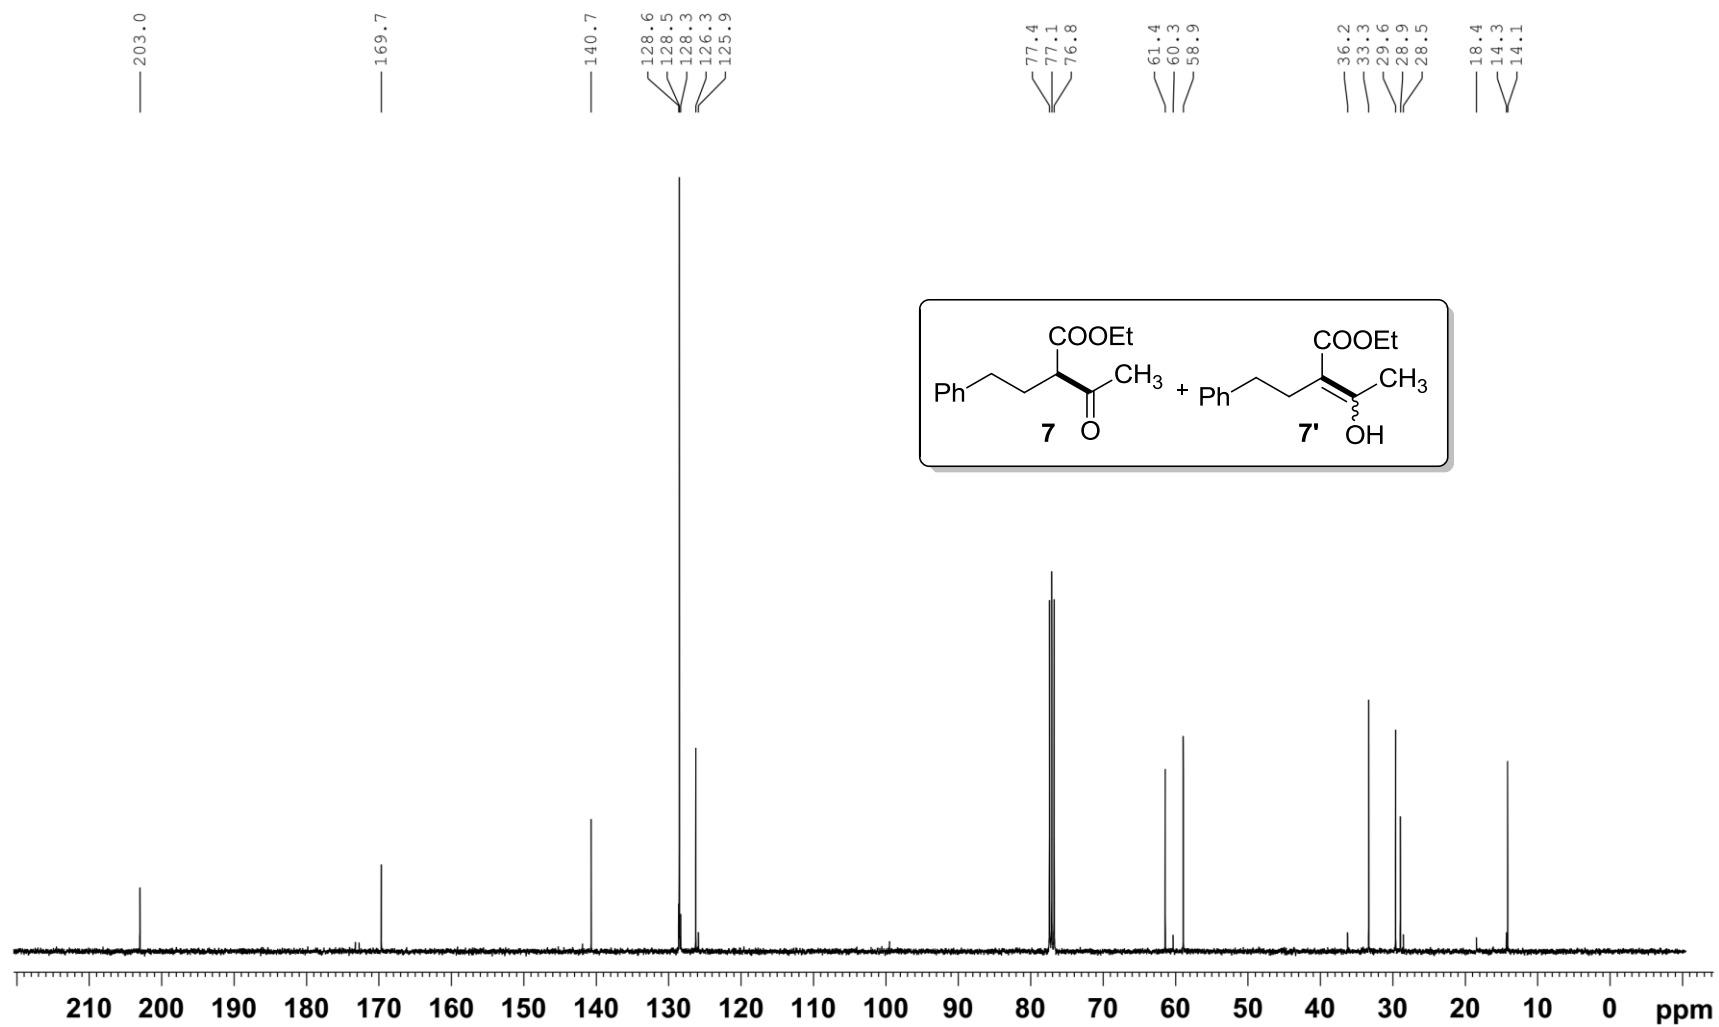

LJW-X180920-1-HNMR

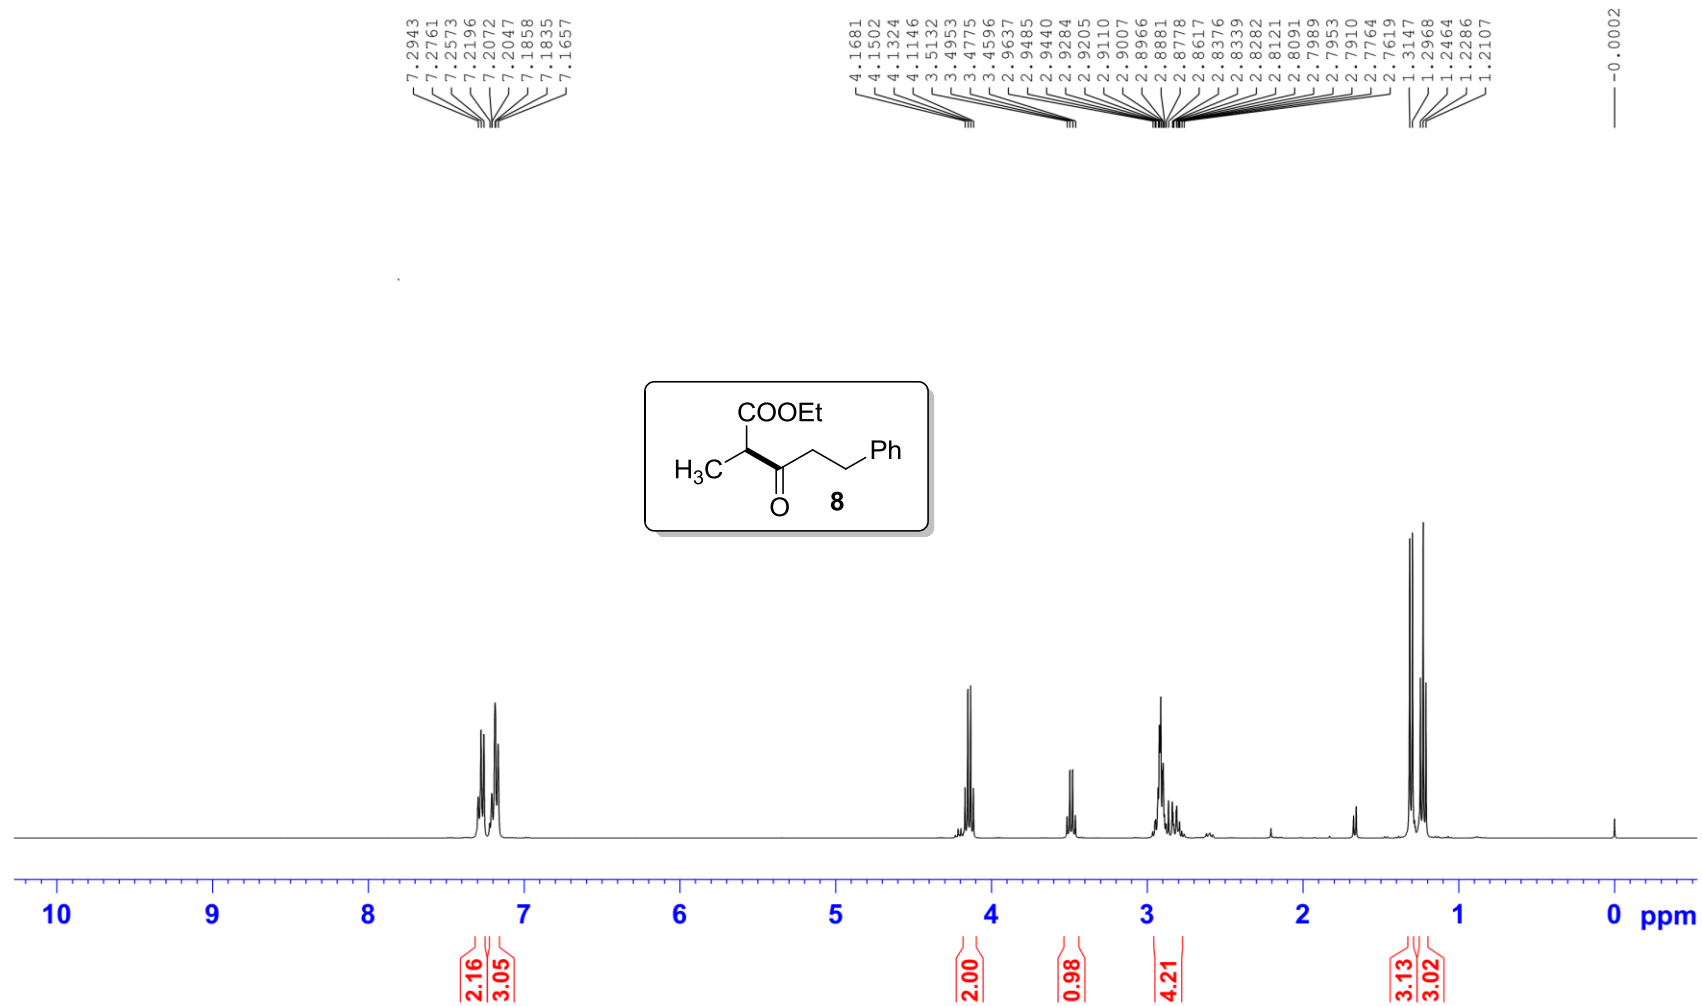

LJW-X180920-1-CNMR

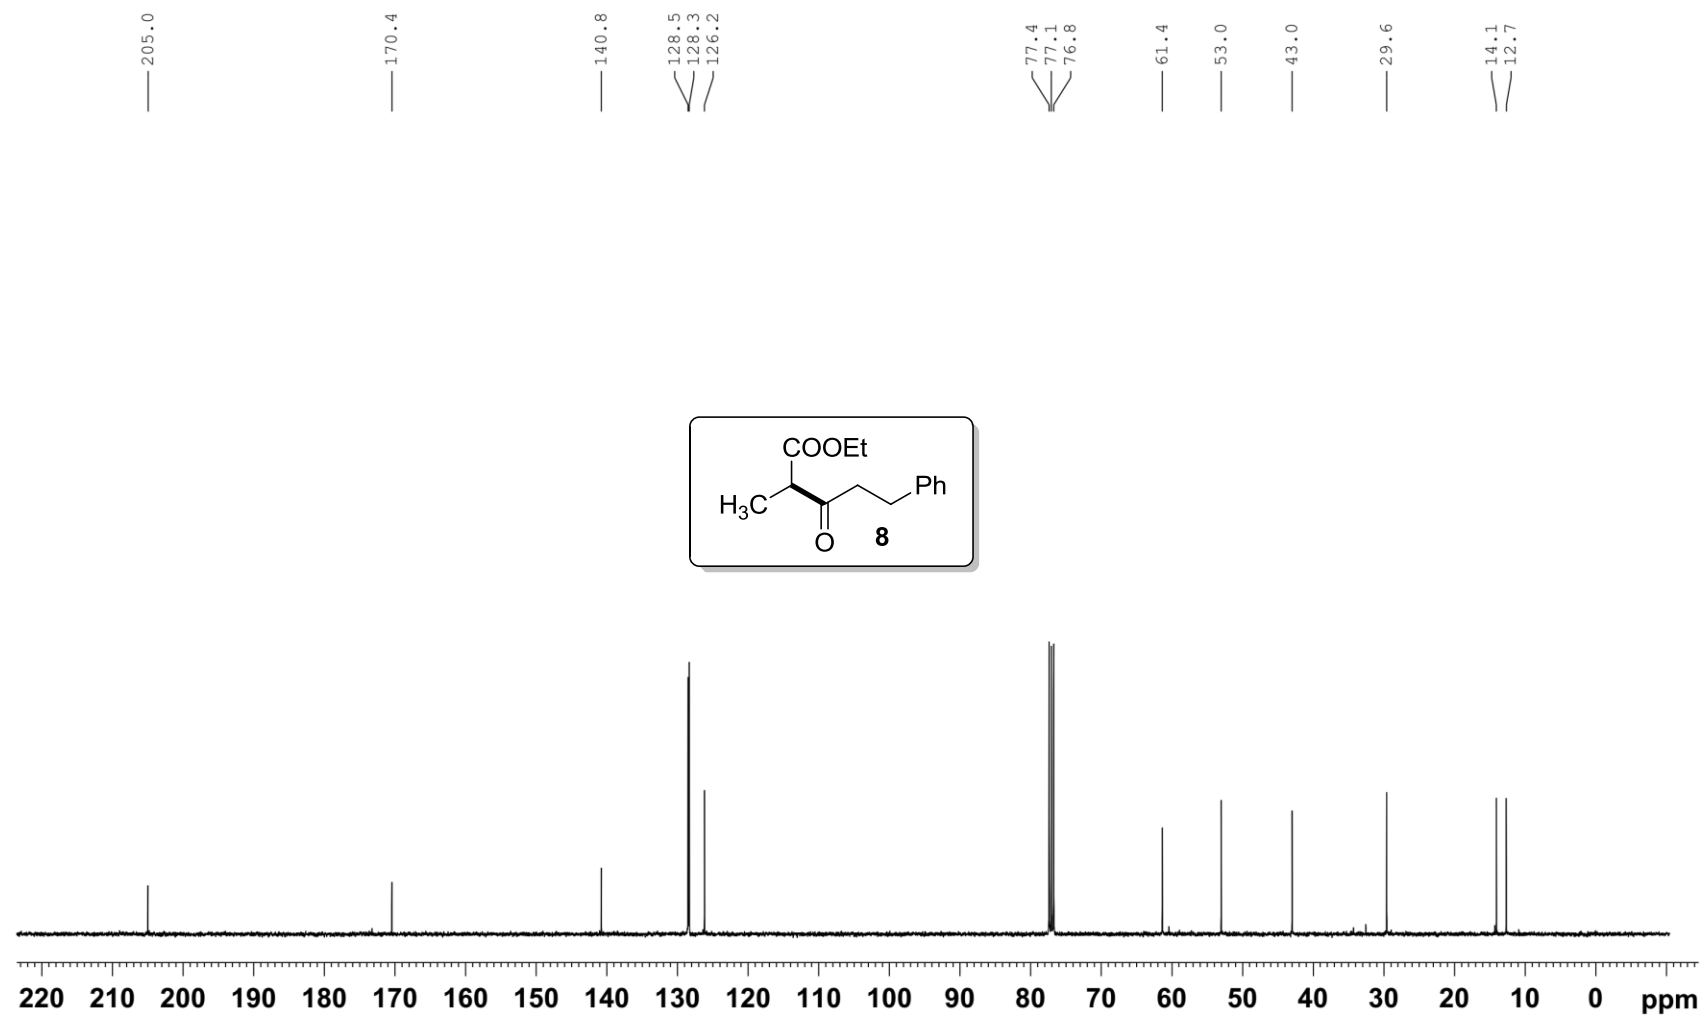

LJW-X180528-8-HNMR

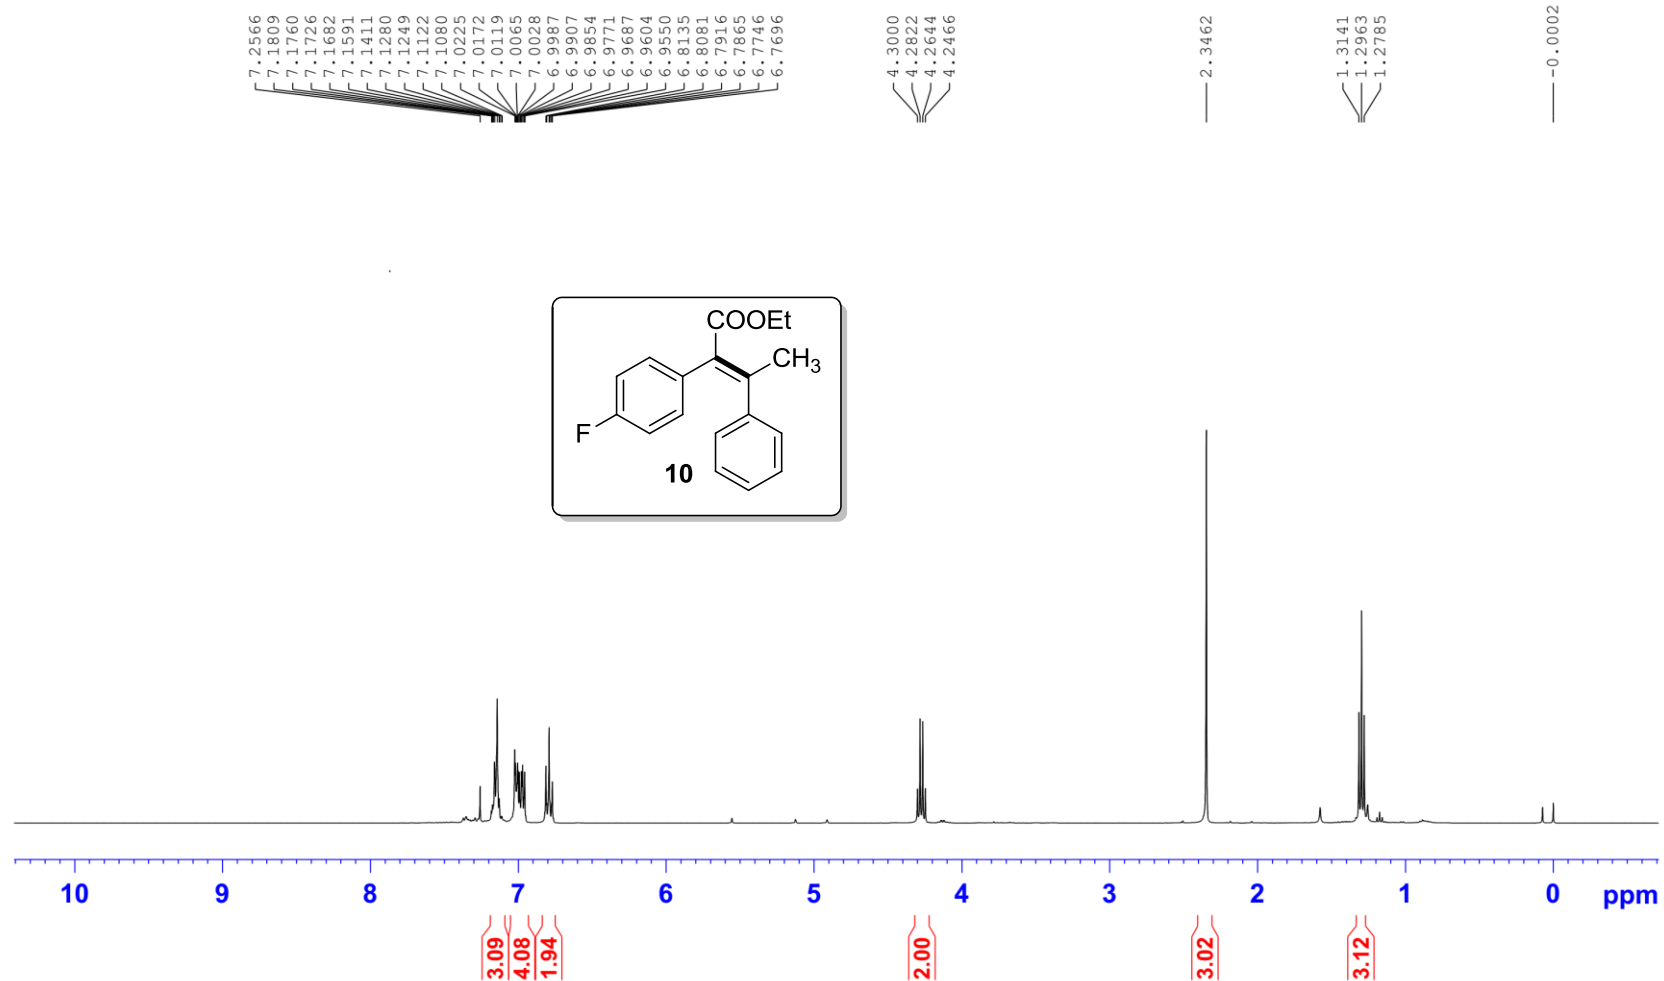

LJW-X180528-8-CNMR

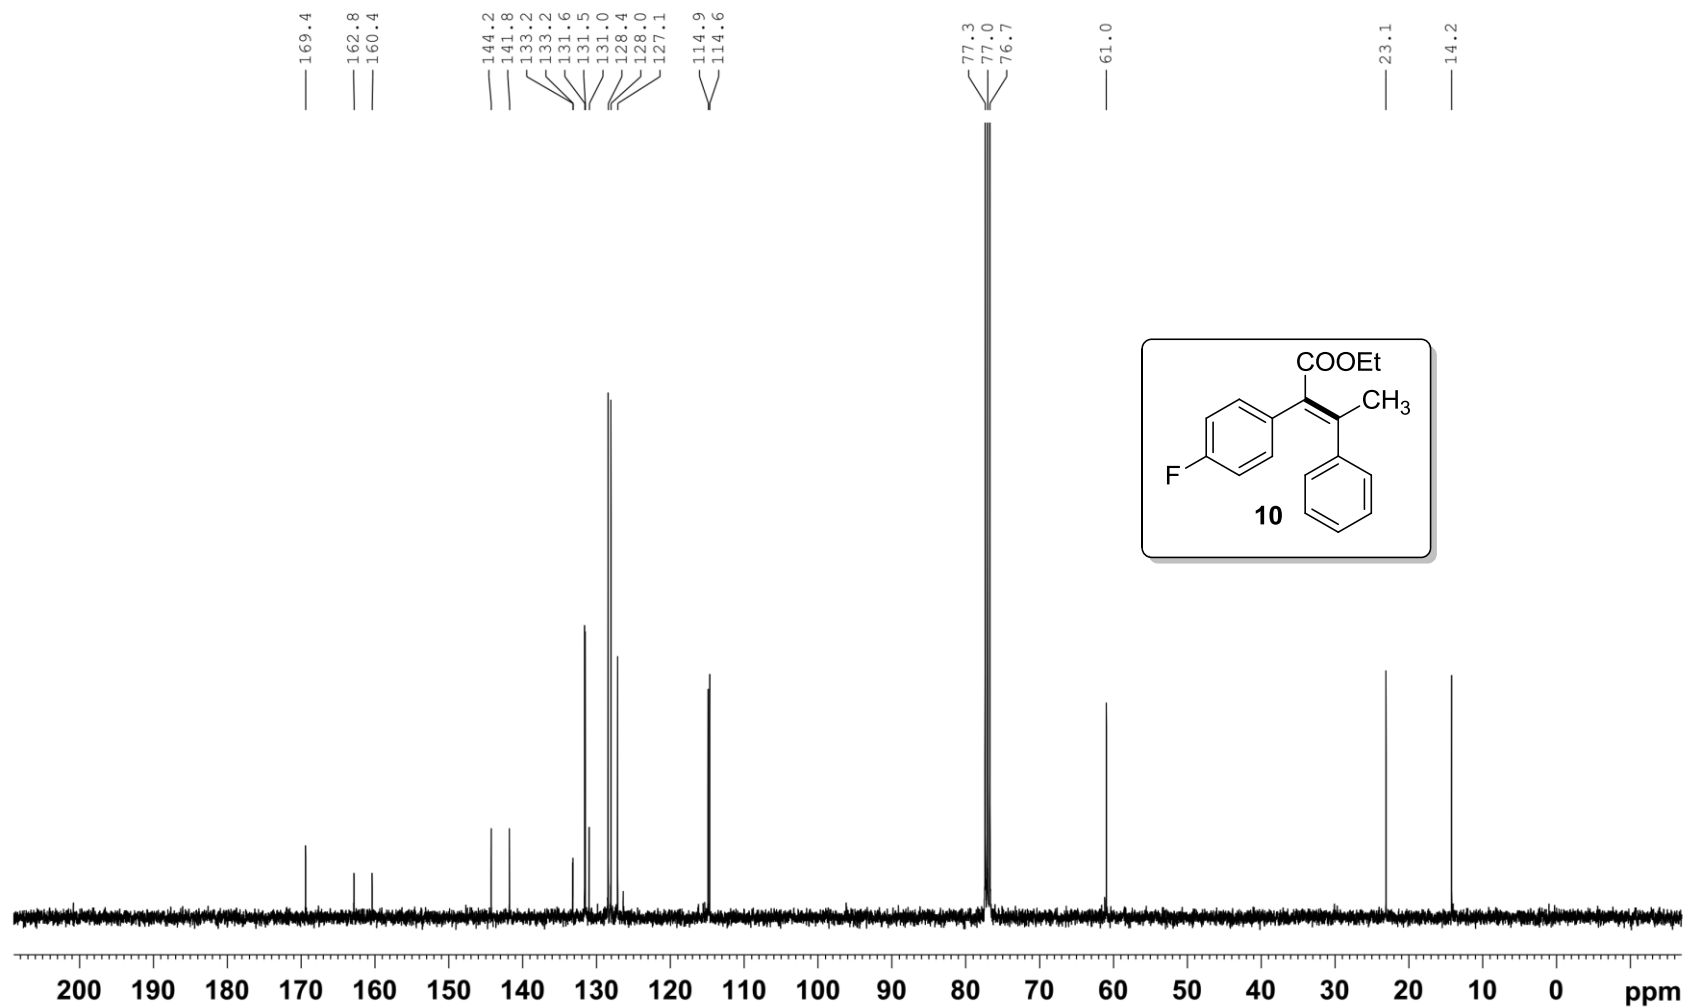

LJW-X180528-8-FNMR

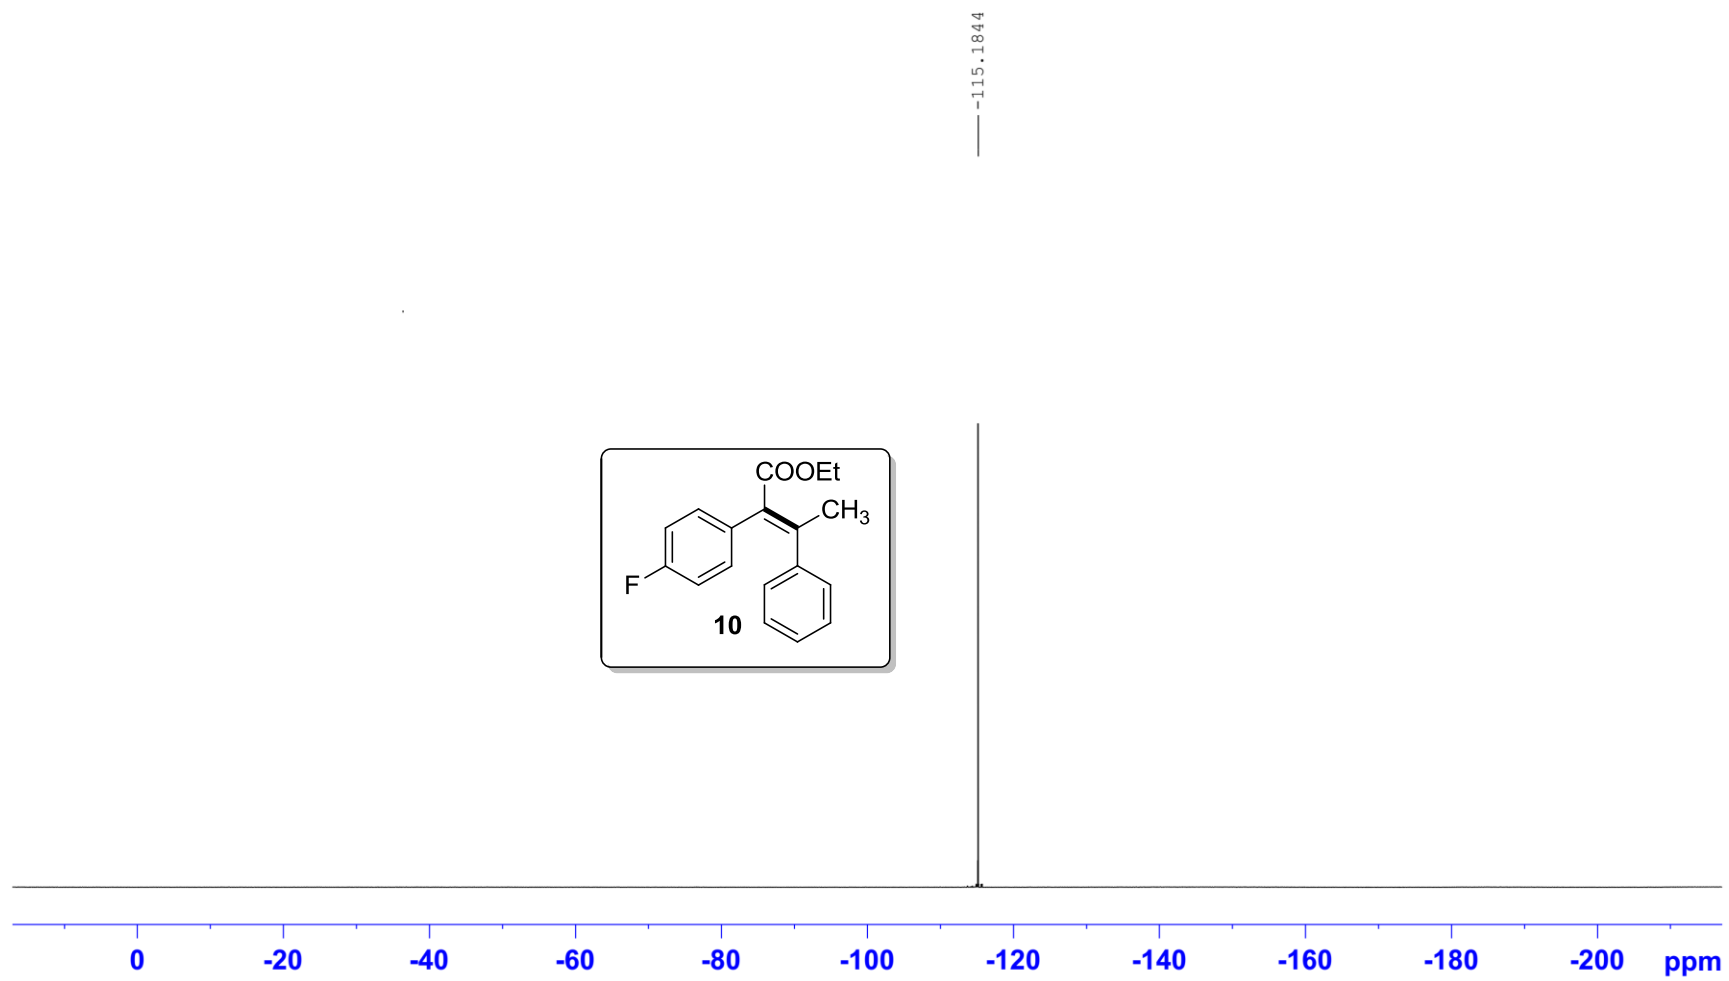

LJW-X180522-1-HNMR

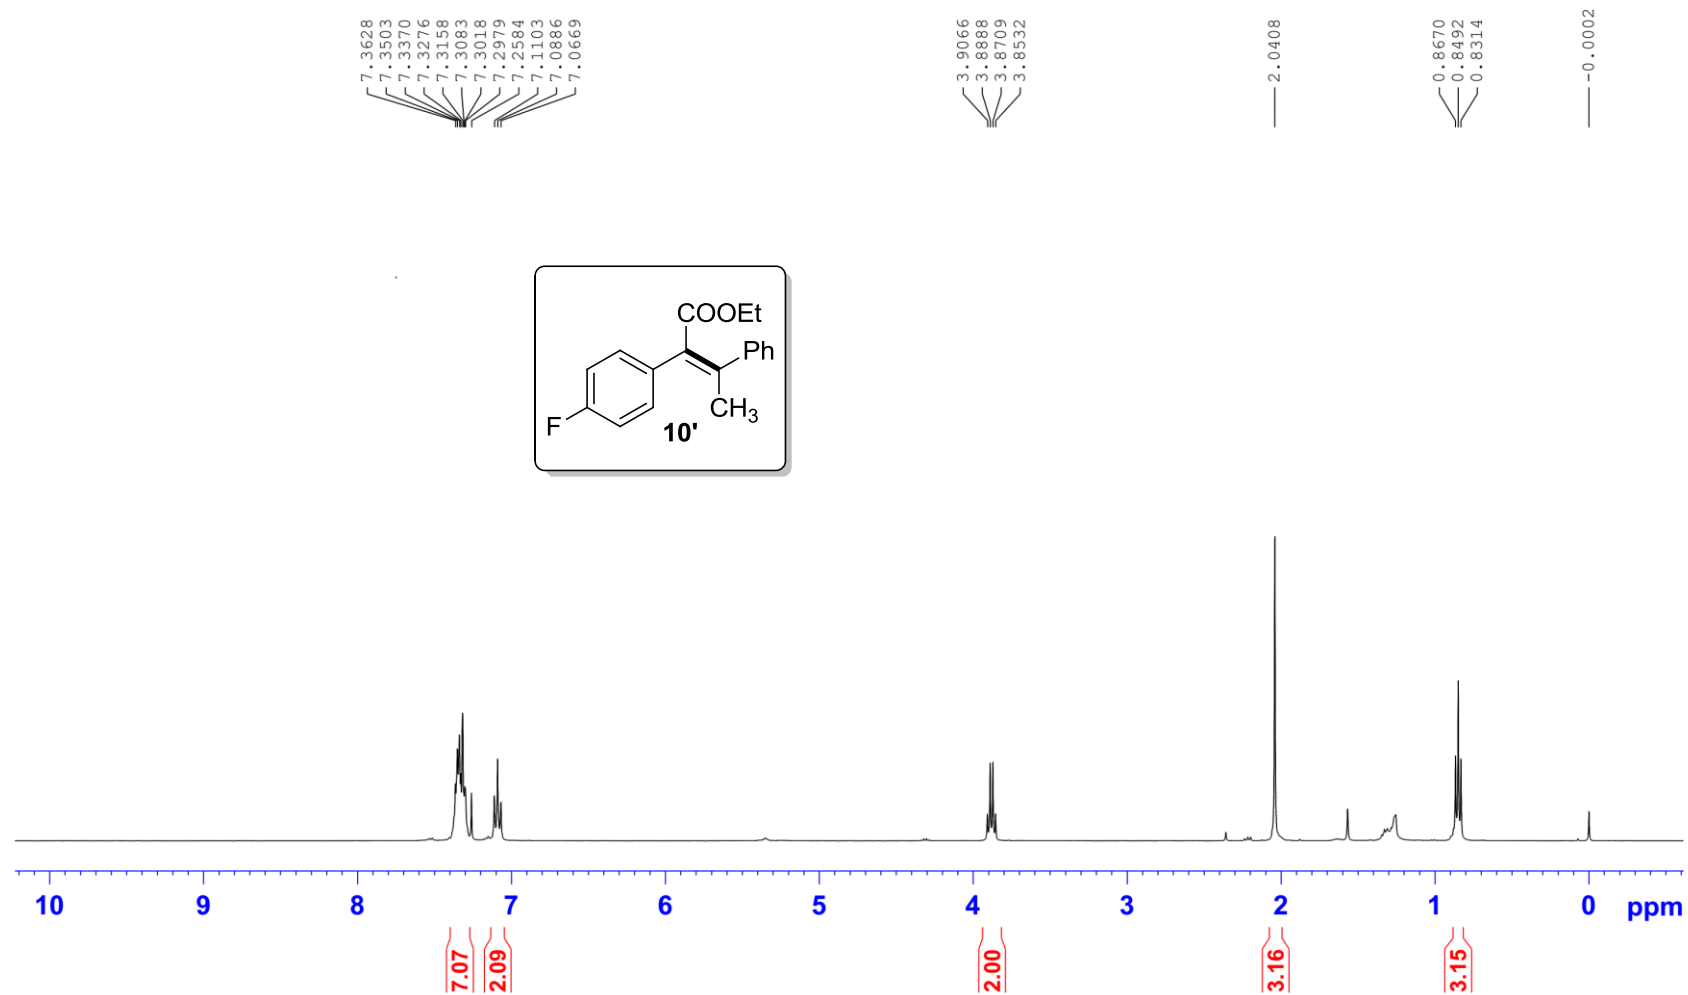

LJW-X170918-5-CNMR

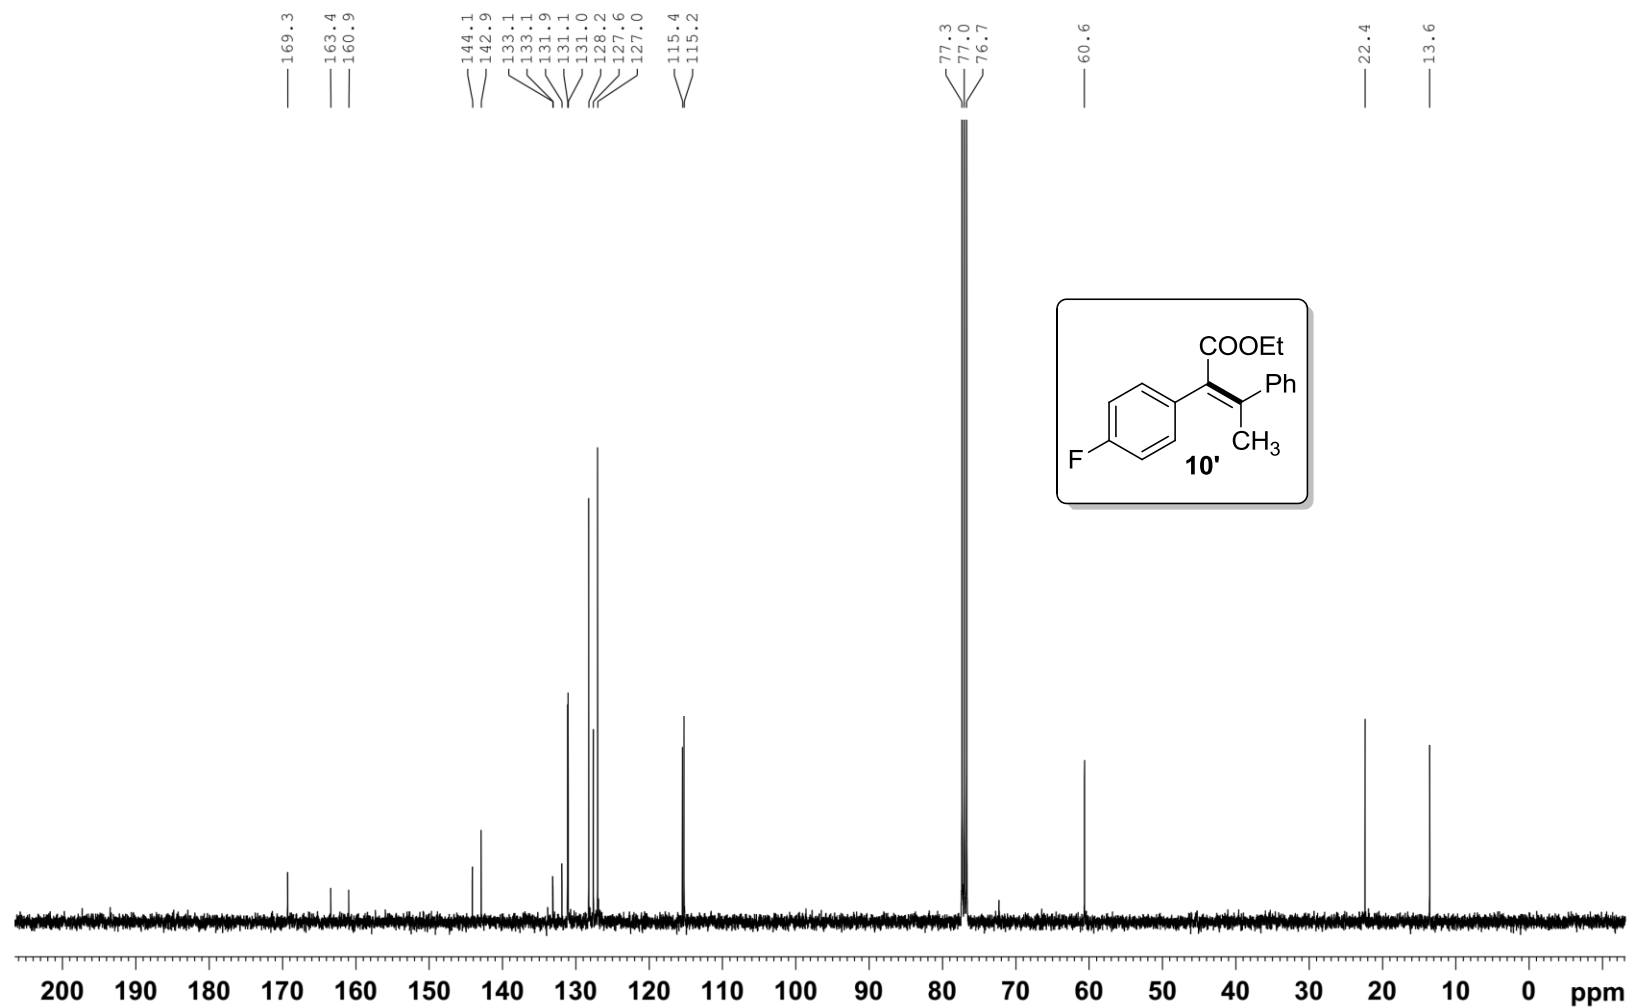

LJW-X170918-5-FNMR

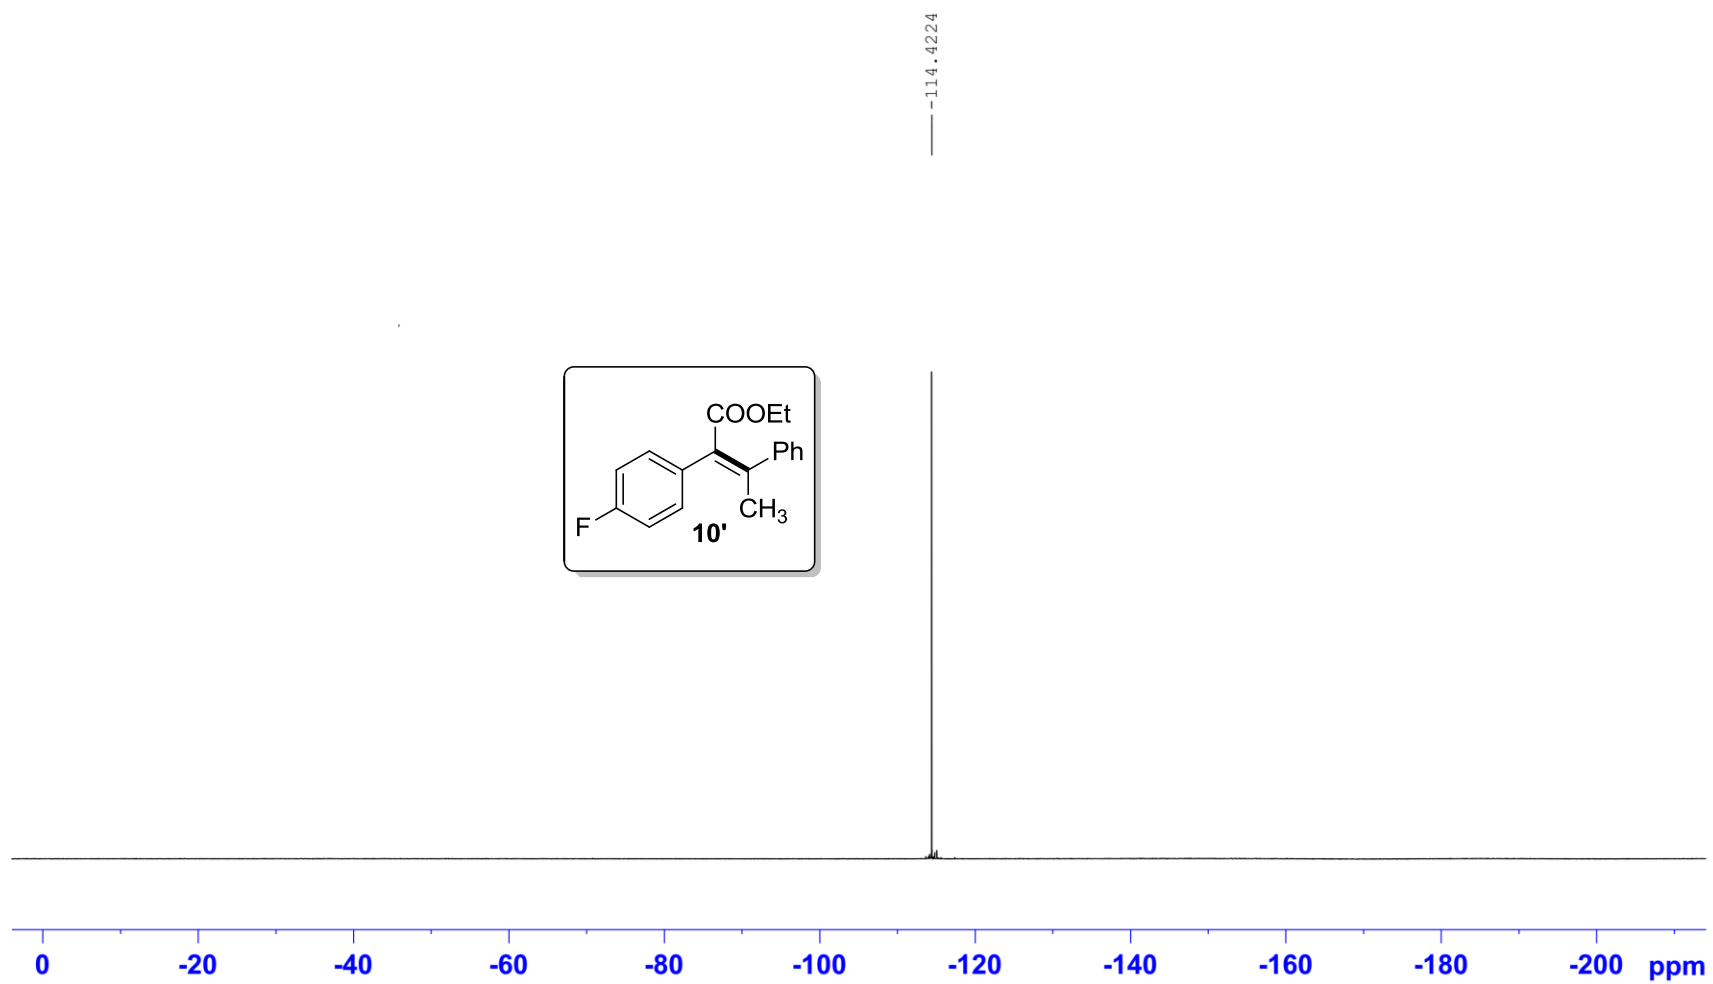

LJW-X180523-4-HNMR

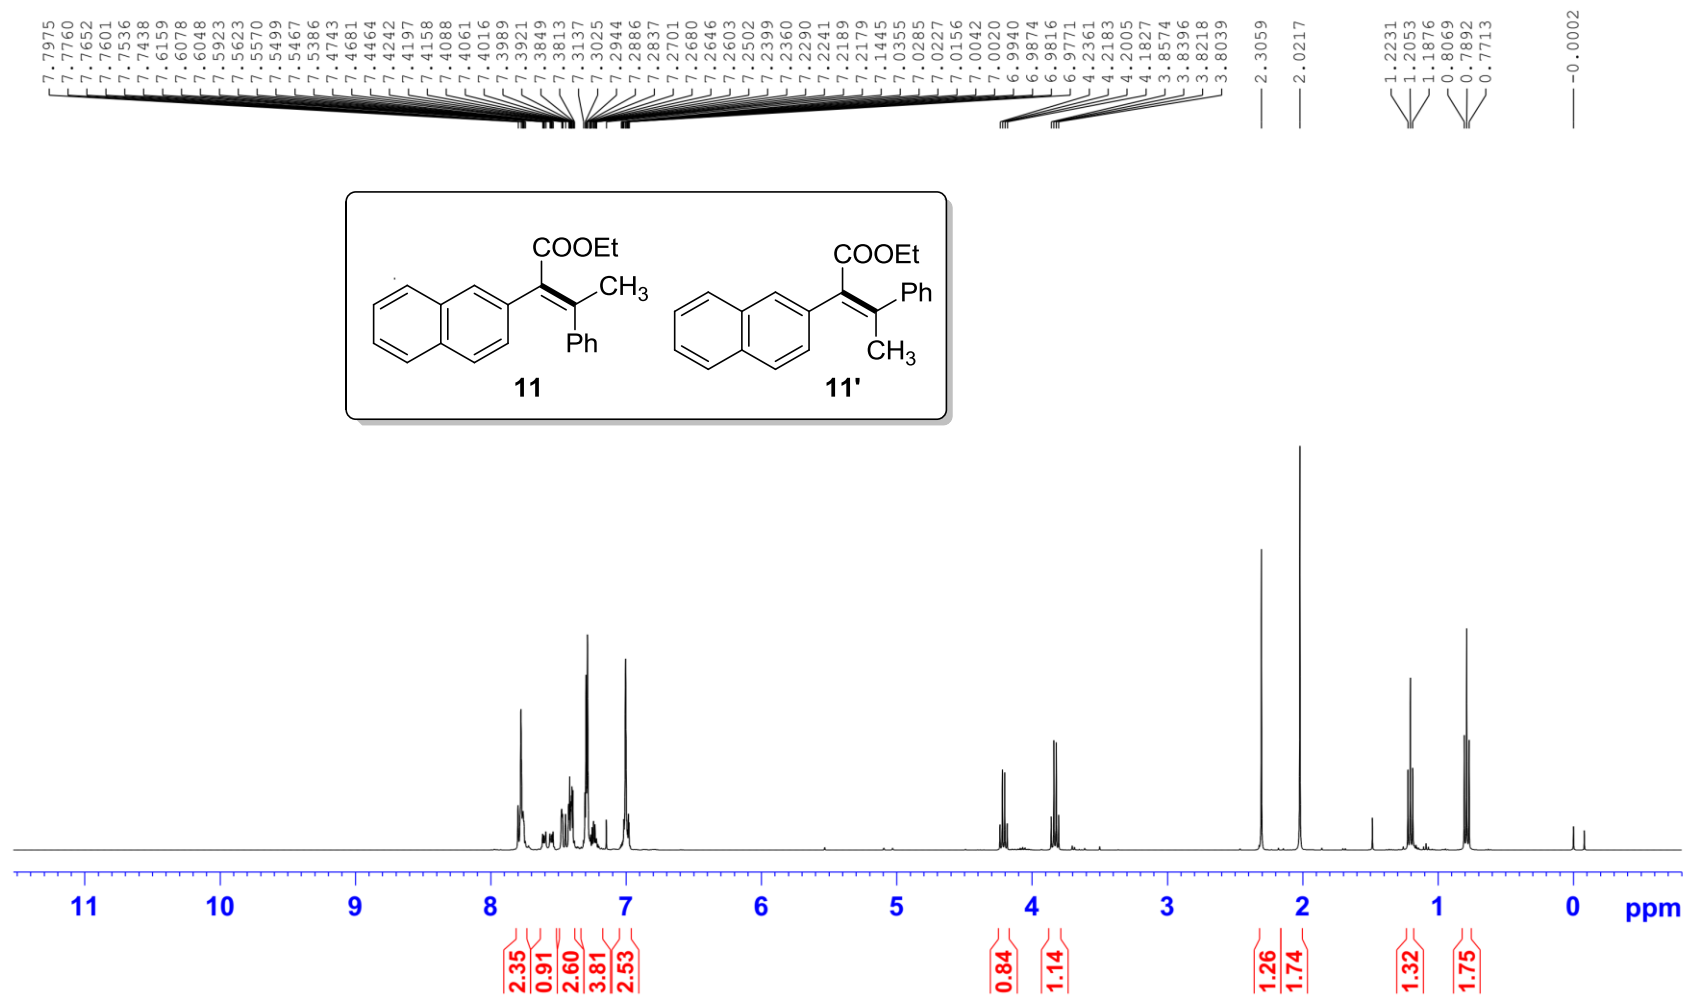

LJW-X180523-4-CNMR

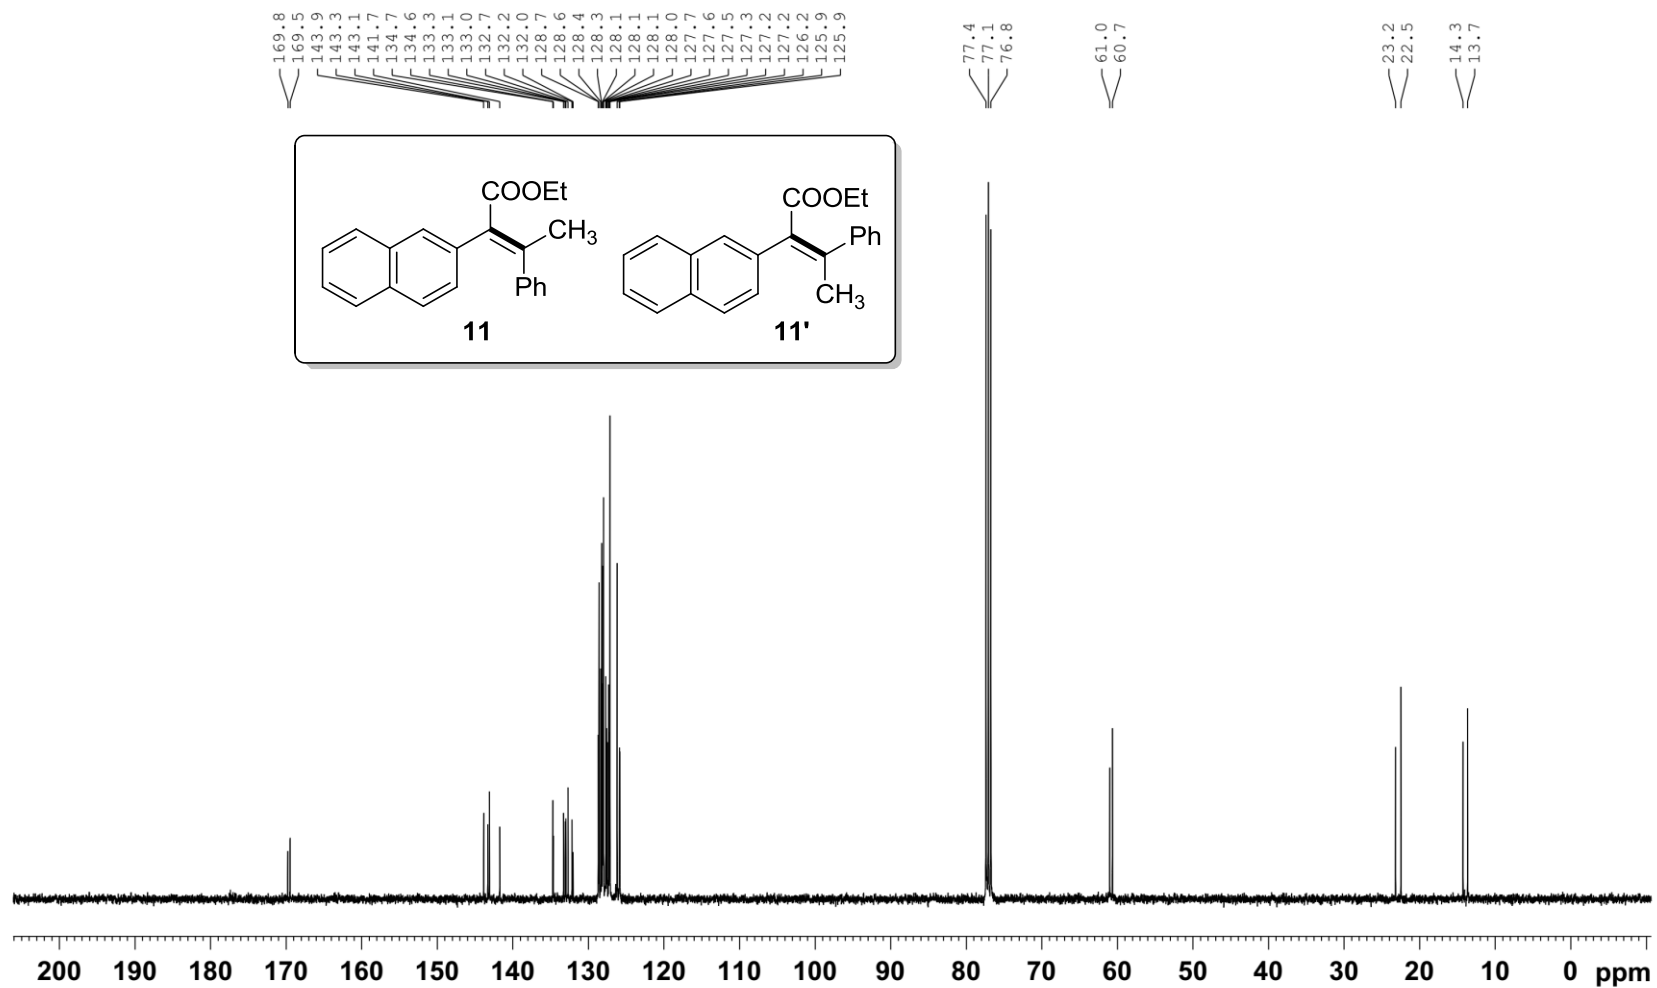

LJW-X180523-5-HNMR

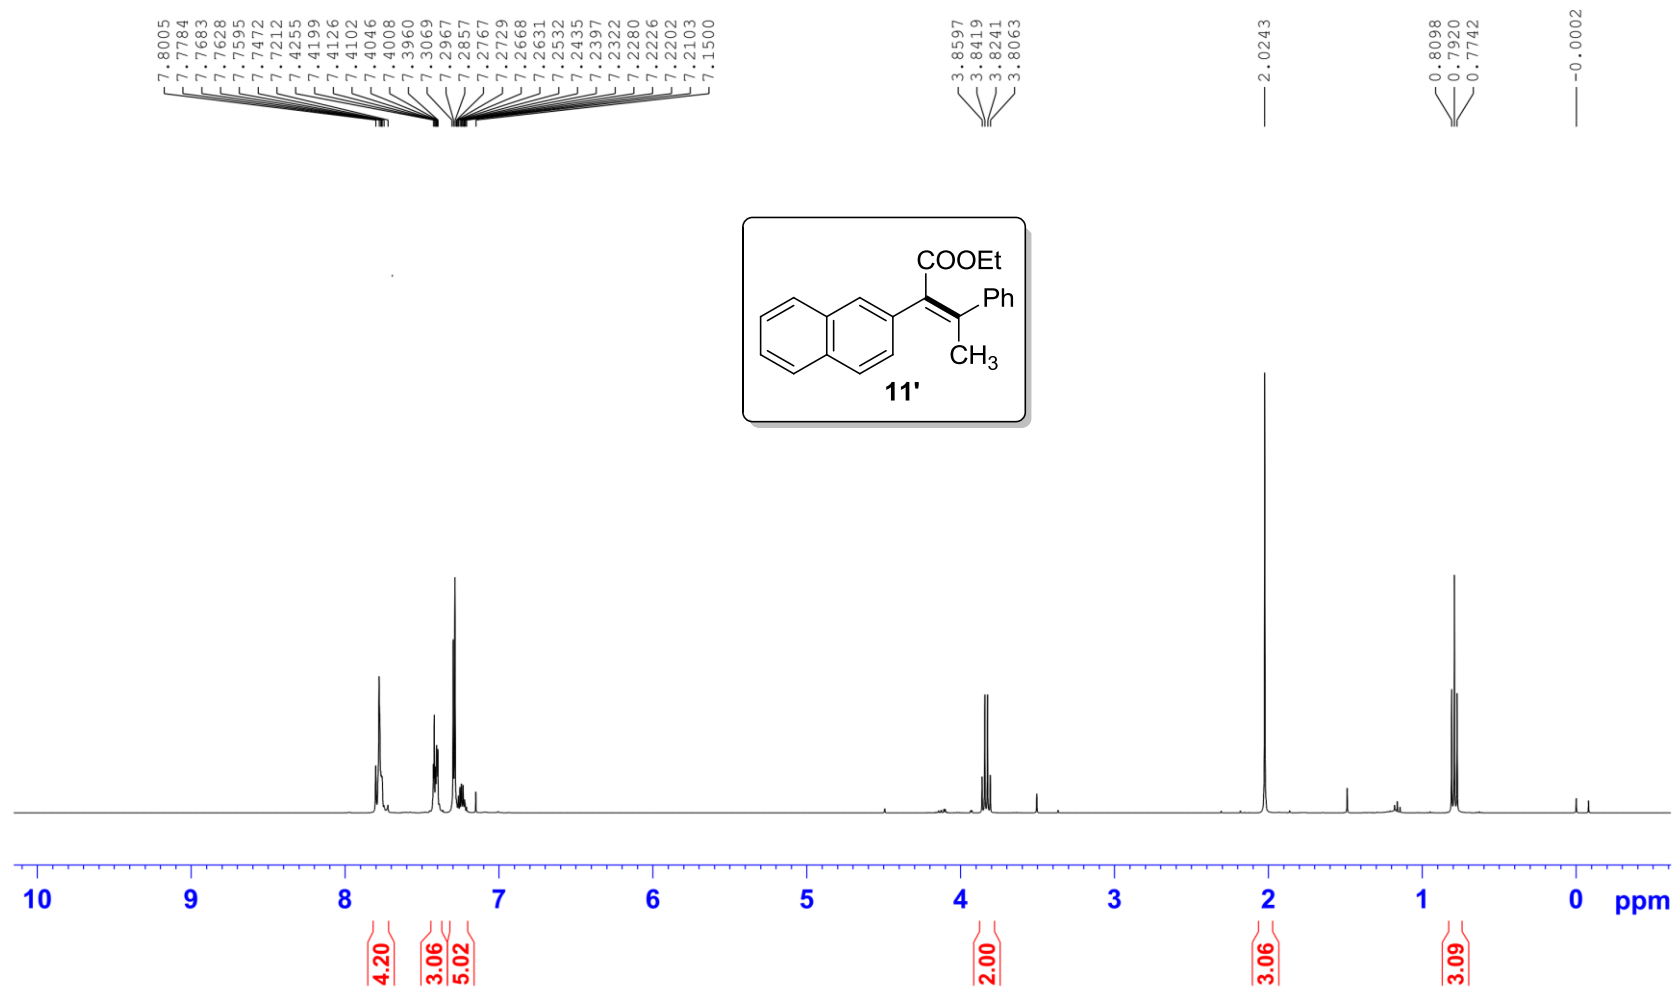

LJW-X180523-5-CNMR

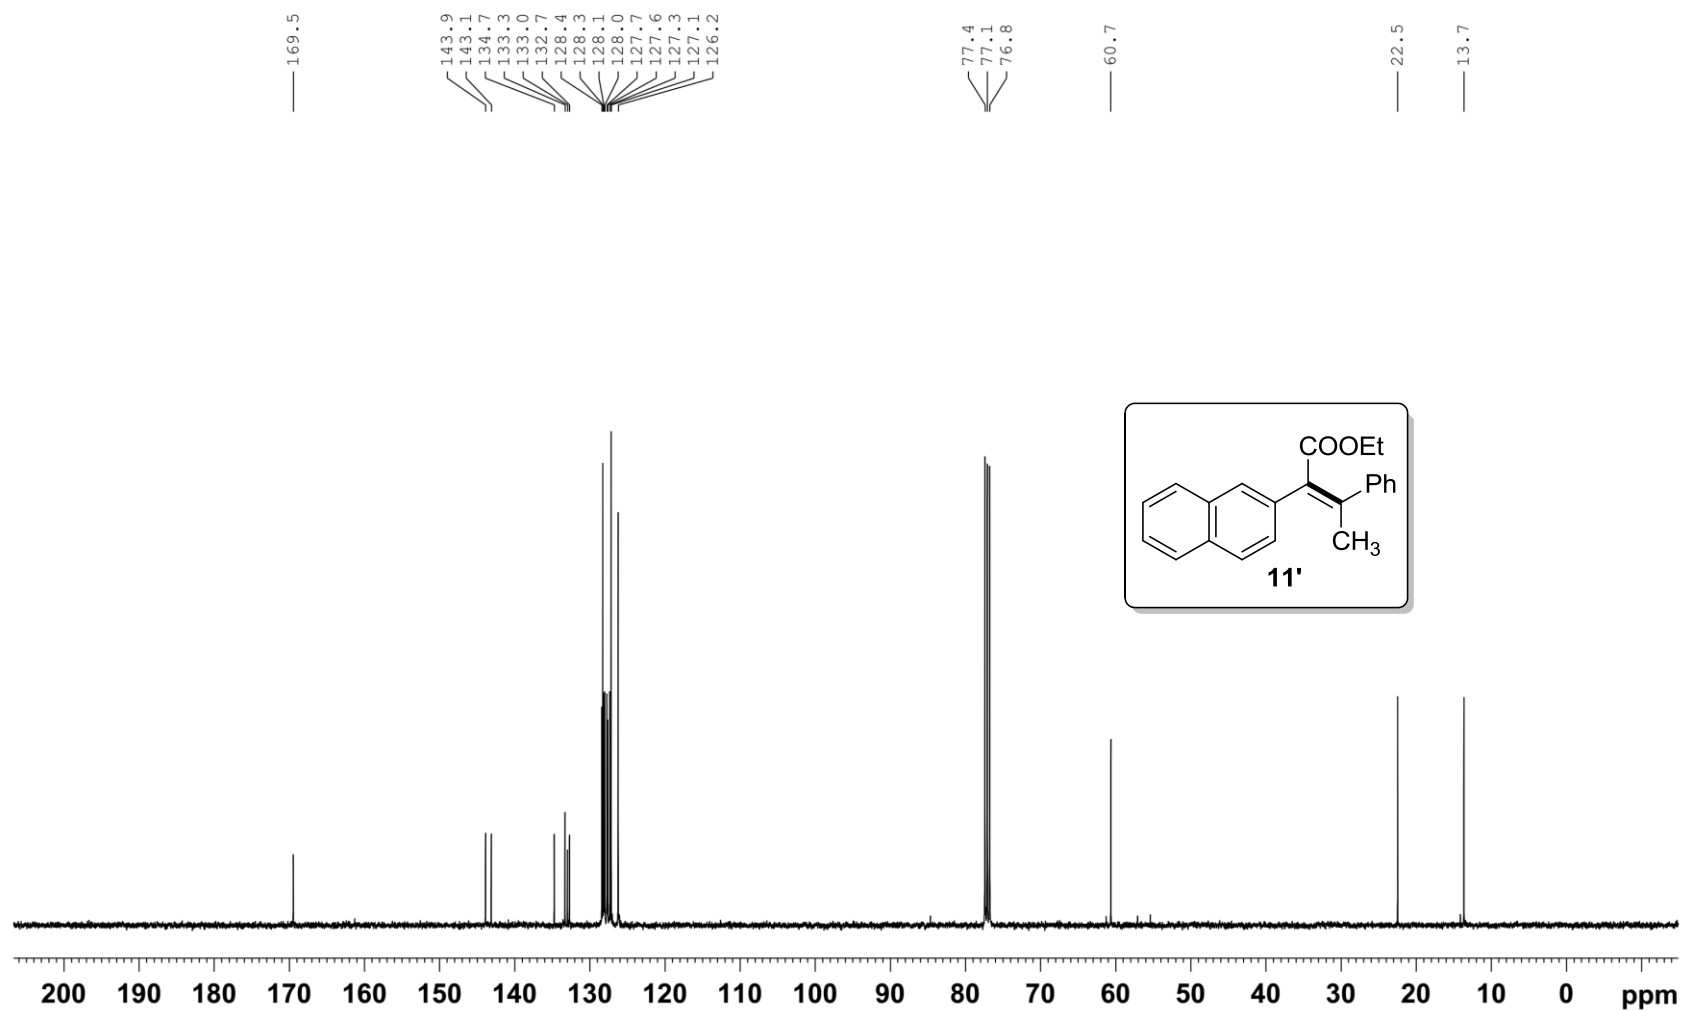

LJW-X180606-6-HNMR

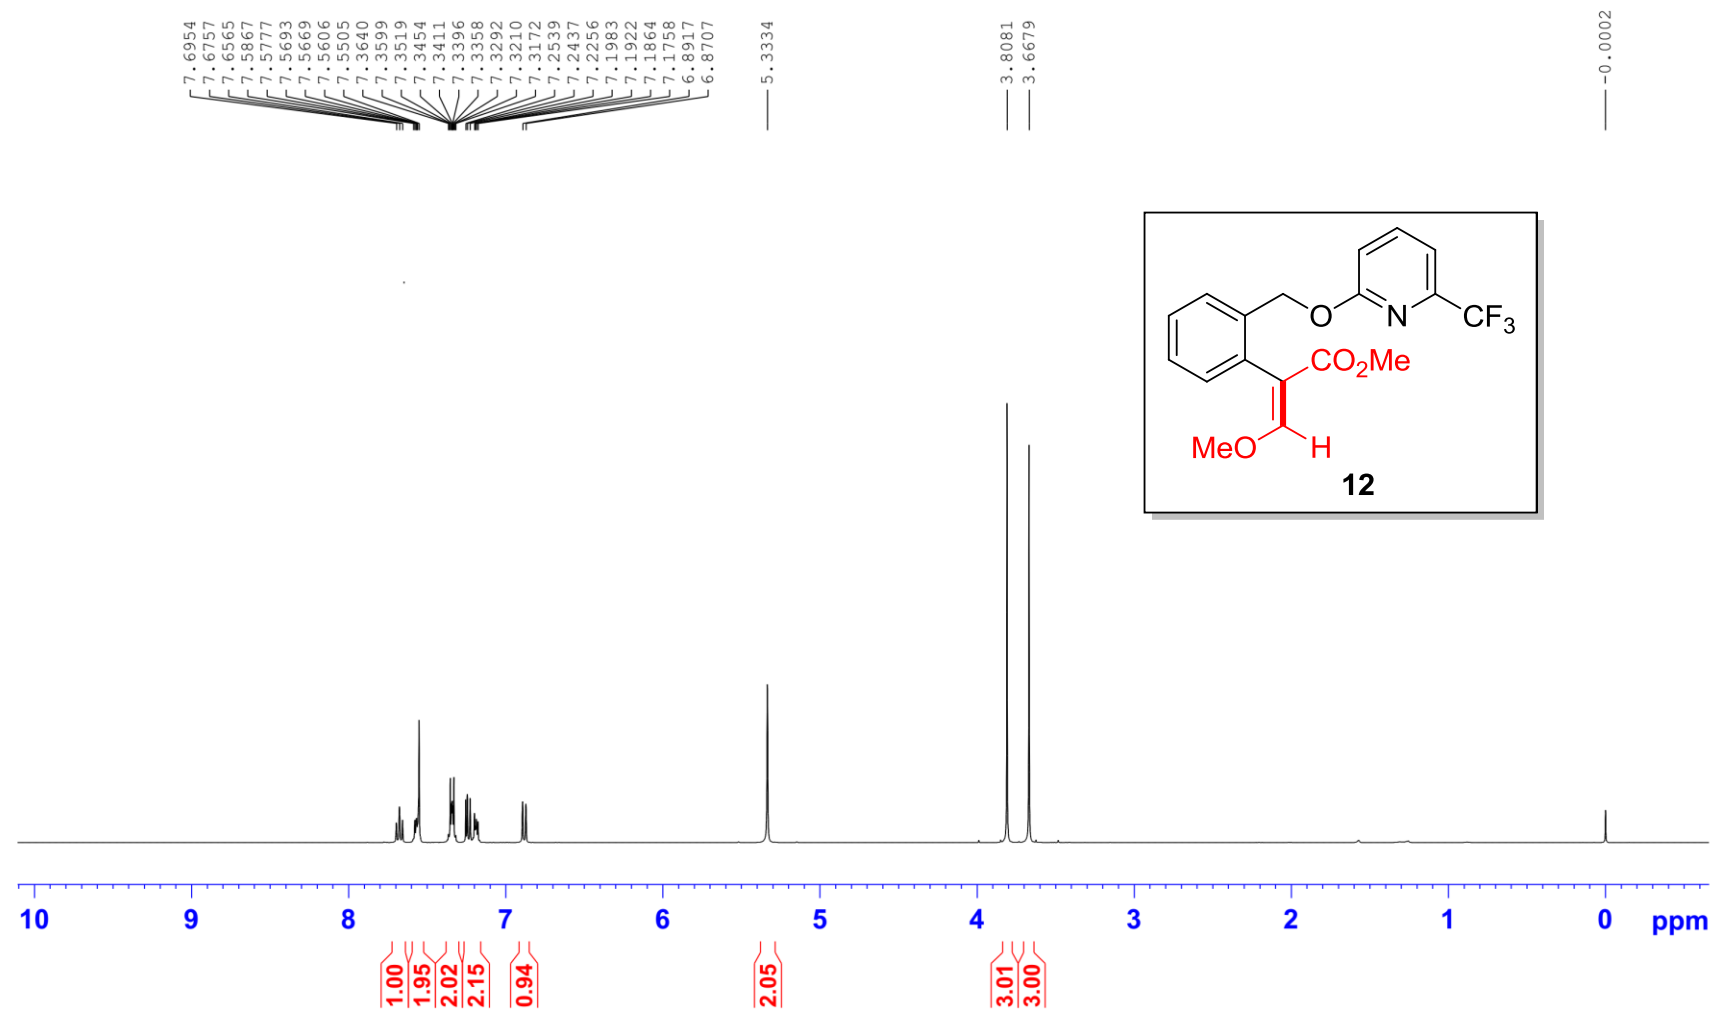

LJW-X180523-8-CNMR

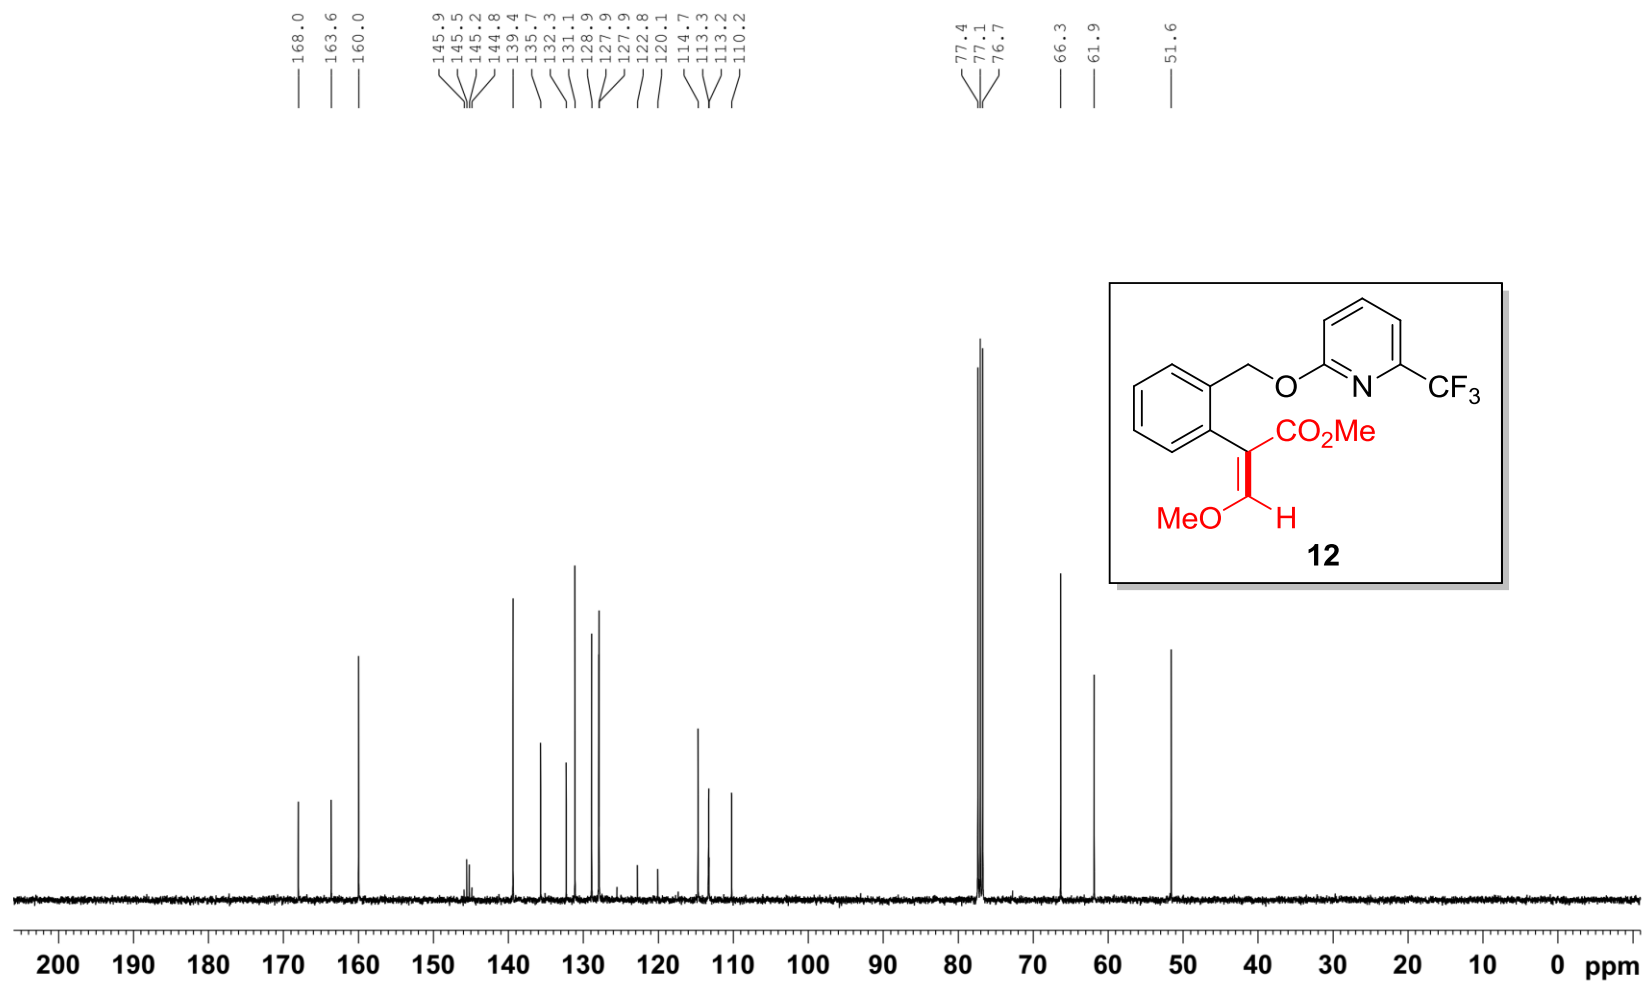

LJW-X180606-6-FNMR

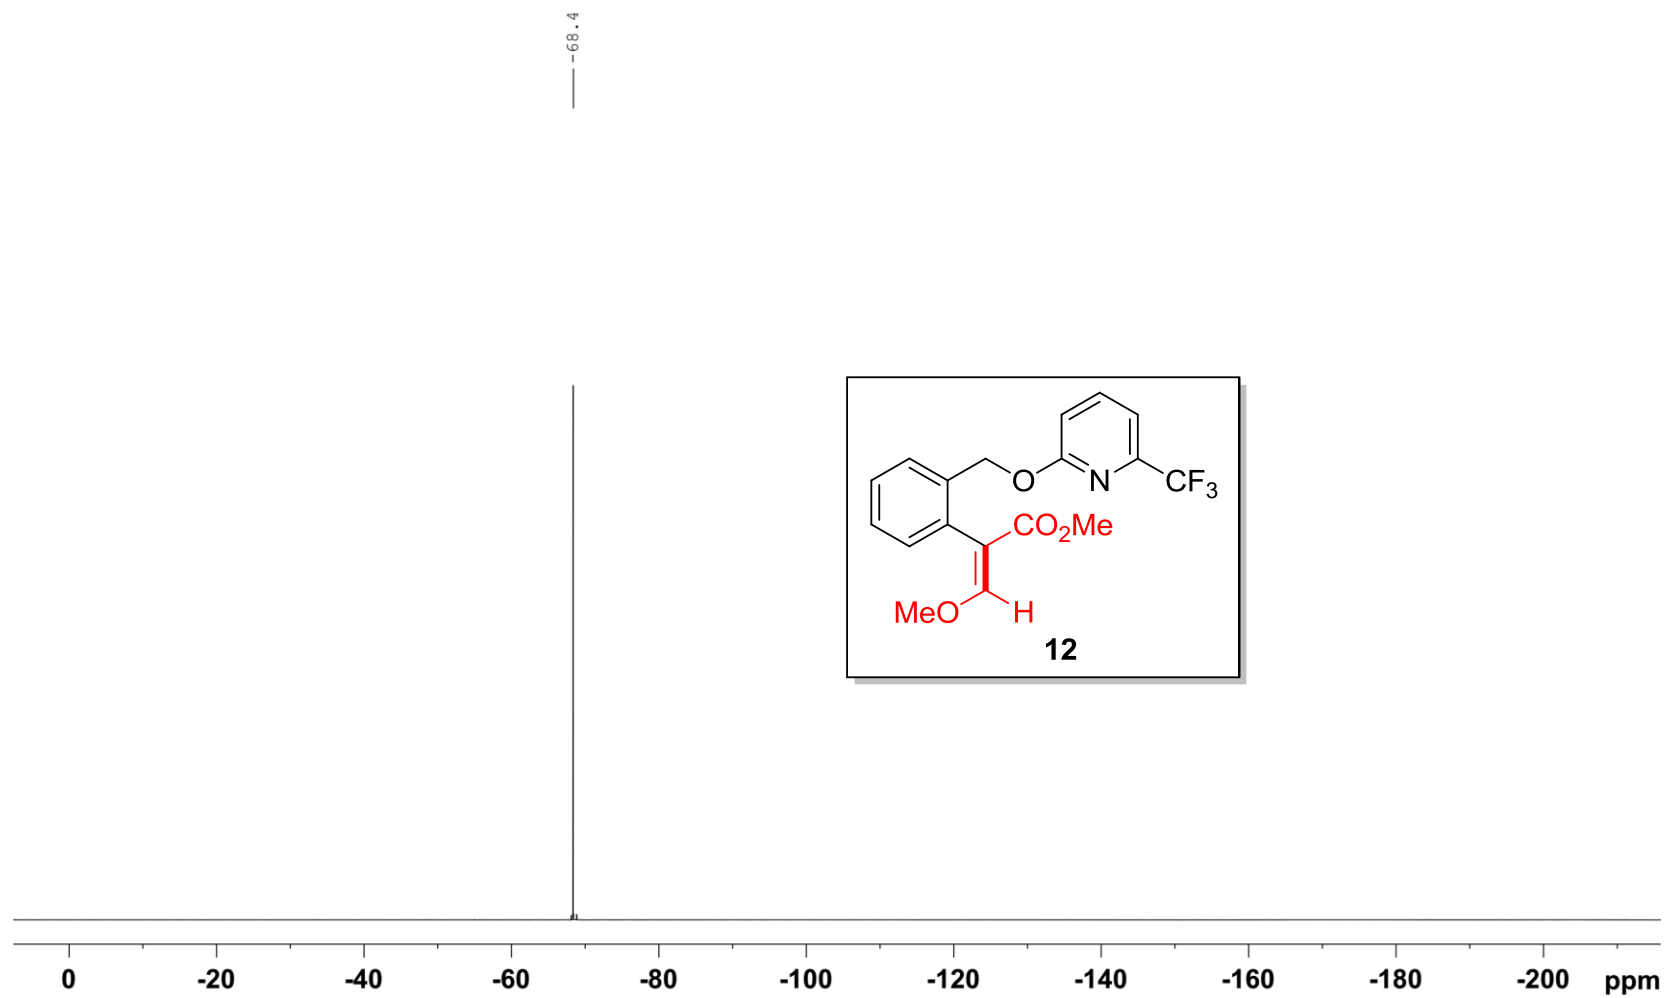

Supplement: Supplementary file 1 [file 13372694]
